# Supplementary material
Source: PubMed Central journal article supplement (PMC7197882)
Supplement: NIHMS1581308-supplement-1.pdf [file NIHMS1581308-supplement-1.pdf]

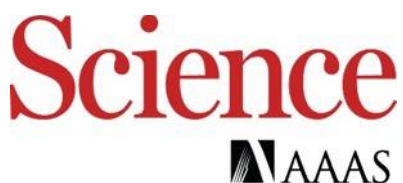

Supplementary Materials for

Genomic architecture and introgression shape a butterfly radiation

Nathaniel B. Edelman, Paul B. Frandsen, Michael Miyagi, Bernardo Clavijo, John Davey, Rebecca Dikow, Gonzalo García-Accinelli, Steven van Belleghem, Nick Patterson, Daniel E. Neafsey, Richard Challis, Sujai Kumar, Gilson Moreira, Camilo Salazar, Mathieu Chouteau, Brian Counterman, Riccardo Papa, Mark Blaxter, Robert D. Reed, Kanchon Dasmahapatra, Marcus Kronforst, Mathieu Joron, Chris D. Jiggins, W. Owen McMillan, Federica Di Palma, Andrew J. Blumberg, John Wakeley, David Jaffe, James Mallet

Correspondence to: nedelman@g.harvard.edu; jmallet@oeb.harvard.edu

**This PDF file includes:**

Materials and Methods

Figs. S1- S95

Tables S1- S14

References (36-88)

**Table of Contents**

|                                                                            |           |
|----------------------------------------------------------------------------|-----------|
| <b>Materials and Methods</b> .....                                         | <b>6</b>  |
| <i>Samples</i> .....                                                       | 6         |
| <i>Genome assembly with DISCOVAR de novo and w2rap</i> .....               | 6         |
| <i>Assembly quality assessment</i> .....                                   | 6         |
| <i>Alignment</i> .....                                                     | 7         |
| <i>Phylogeny</i> .....                                                     | 7         |
| <i>Introgression analysis</i> .....                                        | 8         |
| <i>Recombination rate estimates</i> .....                                  | 10        |
| <i>Triplet Gene Tree Test</i> .....                                        | 10        |
| <i>Mapping inversions</i> .....                                            | 11        |
| <b>Supplementary Text</b> .....                                            | <b>12</b> |
| <i>Section 1. DISCOVAR de novo/w2rap Assembly and Quality</i> .....        | 12        |
| Conclusion: comparison of DISCOVAR/w2rap with other assembly methods ..... | 14        |

|                                                                           |           |
|---------------------------------------------------------------------------|-----------|
| <i>Section 2: Scaffolding With DISCOVAR</i> .....                         | 15        |
| <i>Section 3: progressiveCactus Alignment</i> .....                       | 18        |
| <i>Section 4: Phylogeny</i> .....                                         | 19        |
| <i>Section 5: D-statistics</i> .....                                      | 21        |
| <i>Section 6: Phylogenetic Networks</i> .....                             | 22        |
| <i>Section 7: Triplet internal branch length test</i> .....               | 24        |
| <i>Section 8: Topology distribution</i> .....                             | 34        |
| <i>Section 9: Chromosome 2 Inversion</i> .....                            | 36        |
| <b>Supplementary Figures</b> .....                                        | <b>37</b> |
| <i>Fig. S1 K-mer spectra for all de novo assemblies.</i> .....            | 44        |
| <i>Fig. S2 Relationship of N50 to repeat content</i> .....                | 45        |
| <i>Fig. S3 Relationship of N50 to heterozygosity</i> .....                | 46        |
| <i>Fig. S4 Relationship of N50 to number of contigs</i> .....             | 47        |
| <i>Fig. S5 BUSCO gene content</i> .....                                   | 48        |
| <i>Fig. S6 H. melpomene w2rap to Hmel2 contig alignment quality</i> ..... | 49        |
| <i>Fig. S7 Contig alignment quality by contig size</i> .....              | 50        |
| <i>Fig. S8 Cumulative alignment length by quality</i> .....               | 51        |
| <i>Fig. S9 Scaffolding with DISCOVAR flow chart</i> .....                 | 52        |
| <i>Fig. S10 Example overview alignment</i> .....                          | 53        |
| <i>Fig. S11 Example full contig alignment</i> .....                       | 54        |
| <i>Fig. S12 Example full group alignment</i> .....                        | 55        |
| <i>Fig. S13 Coverage of gap-filled regions</i> .....                      | 56        |
| <i>Fig. S14 Coverage of gap-filled and non gap-filled regions</i> .....   | 57        |
| <i>Fig. S15 Coverage with distance from filled gap</i> .....              | 58        |
| <i>Fig. S16 Pairwise alignment depth</i> .....                            | 59        |
| <i>Fig. S17 Cumulative alignment depth to H. melpomene Hmel2.5</i> .....  | 60        |
| <i>Fig. S18 Cumulative alignment depth to B. mori</i> .....               | 61        |
| <i>Fig. S19 Consensus phylogeny</i> .....                                 | 62        |
| <i>Fig. S20 Summary of node support</i> .....                             | 63        |
| <i>Fig. S21 DensiTree plot with normalized branch lengths</i> .....       | 64        |
| <i>Fig. S22 Heliconiini 10 kb block statistics</i> .....                  | 65        |
| <i>Fig. S23 Heliconiini 10 kb block pairwise statistics</i> .....         | 66        |
| <i>Fig. S24 gene alignment statistics</i> .....                           | 67        |

Fig. S25 Pairwise gene statistics ..... 68

Fig. S26 All species, non-coding block statistics ..... 69

Fig. S27 All species, noncoding blocks pairwise statistics ..... 70

Fig. S28 All species, coding block statistics ..... 71

Fig. S29 All species coding block pairwise statistics ..... 72

Fig. S30 *Heliconius* species noncoding block statistics..... 73

Fig. S31 *Heliconius* species non-coding pairwise statistics ..... 74

Fig. S32 *Heliconius* coding block statistics ..... 75

Fig. S33 *Heliconius* coding block pairwise statistics ..... 76

Fig. S34 Maximum likelihood concatenated tree for genes generated in IQtree. .... 77

Fig. S35 ASTRAL tree for genes. Species tree generated in ASTRAL for gene alignments. .... 78

Fig. S36 Concatenated tree for noncoding, fully aligned blocks greater than or equal to 100 bp..... 79

Fig. S37 ASTRAL tree for noncoding, fully aligned blocks greater than or equal to 100 bp... 80

Fig. S38 Concatenated tree for noncoding, fully aligned blocks greater than or equal to 150 bp..... 81

Fig. S39 ASTRAL tree for noncoding, fully aligned blocks greater than or equal to 150 bp... 82

Fig. S40 Concatenated tree for coding, fully aligned blocks greater than or equal to 100 bp. 83

Fig. S41 ASTRAL tree for coding, fully aligned blocks greater than or equal to 100 bp..... 84

Fig. S42 Concatenated tree for coding, fully aligned blocks greater than or equal to 150 bp. 85

Fig. S43 ASTRAL tree for coding, fully aligned blocks greater than or equal to 150 bp..... 86

Fig. S44 Concatenated tree for noncoding, fully aligned blocks among *Heliconiini* that are greater than or equal to 100 bp. .... 87

Fig. S45 ASTRAL tree for noncoding, fully aligned blocks among *Heliconiini* that are greater than or equal to 100 bp. .... 88

Fig. S46 Concatenated tree for noncoding, fully aligned blocks among *Heliconiini* that are greater than or equal to 150 bp. .... 89

Fig. S47 ASTRAL tree for noncoding, fully aligned blocks among *Heliconiini* that are greater than or equal to 150 bp. .... 90

Fig. S48 Concatenated tree for coding, fully aligned blocks among *Heliconiini* that are greater than or equal to 100 bp. .... 91

Fig. S49 ASTRAL tree for coding, fully aligned blocks among *Heliconiini* that are greater than or equal to 100 bp. .... 92

Fig. S50 Concatenated tree for coding, fully aligned blocks among *Heliconiini* that are greater than or equal to 150 bp. .... 93

Fig. S51 ASTRAL tree for coding, fully aligned blocks among *Heliconiini* that are greater than or equal to 150 bp. .... 94

Fig. S52 D-statistic values for all triplets. .... 95

Fig. S53 Z-values for D-statistics for all triplets ..... 96

Fig. S54 D-statistics are consistent between alignments ..... 97

Fig. S55 melpomene-silvaniform clade phylogenetic network clustering. .... 98

Fig. S56 erato-sara clade phylogenetic network clustering. .... 99

Fig. S57 phylogenetic networks using PhyloNet Infer\_Network\_MPL. .... 100

Fig. S58 erato clade phylogenetic network using qpGraph ..... 101

Fig. S59 Coalescent framework ..... 102

Fig. S60 Branch length components ..... 103

Fig. S61 Branch length components of introgression topologies ..... 104

Fig. S62 Expected triplet branch length distributions ..... 105

Fig. S63 Branch length test EM algorithm ..... 106

Fig. S64 Tree simulation results ..... 107

Fig. S65 Sequence simulation demographic model ..... 108

Fig. S66 Sequence simulation results ..... 109

Fig. S67 Null demographic model used for simulations of demographic effects ..... 110

Fig. S68 Effects of changing demography ..... 111

Fig. S69 Effects of changing demography; observable introgression fraction ..... 112

Fig. S70 Representative branch length test ..... 113

Fig. S71 Comparison of introgression topology branch length test to  $f_d$  ..... 114

Fig. S72 Branch length test, all erato clade triplets ..... 116

Fig. S73 All topologies, comparison of branch length test to D and  $f_d$  ..... 117

Fig. S74 Effects of timing of introgression on migration rate estimation ..... 118

Fig. S75 Effects of introgression timing on observable introgression fraction estimation .... 119

Fig. S76 Effects of recombination ..... 120

Fig. S77 Heterogeneity of erato-sara clade evolutionary history across the *H. melpomene* genome ..... 121

Fig. S78 Heterogeneity of evolutionary history across the erato genome, 10 kb windows .... 122

Fig. S79 Basic alignment statistics ..... 123

Fig. S80 Correlation between statistics ..... 124

Fig. S81 Alignment statistics by tree topology ..... 125

Fig. S82 Alignment statistics by recombination rate quintile ..... 126

|                                                                                                                                                  |            |
|--------------------------------------------------------------------------------------------------------------------------------------------------|------------|
| Fig. S83 Relationship of recombination rate to number of coding base pairs per window ...                                                        | 127        |
| Fig. S84 Relationship of recombination rate to log number of coding base pairs per window .....                                                  | 128        |
| Fig. S85 Relationship of chromosomal position to recombination rate in <i>H. erato</i> .....                                                     | 129        |
| Fig. S86 Relationship of chromosomal position to number of coding bases per window .....                                                         | 130        |
| Fig. S87 Relationship of chromosome size in <i>H. erato</i> to fraction of coding bases .....                                                    | 131        |
| Fig. S88 Relationship of chromosome size to average recombination rate in <i>H. erato</i> .....                                                  | 132        |
| Fig. S89 Relationship of topology fraction to chromosome length in <i>H. erato</i> . .....                                                       | 133        |
| Fig. S90 Relationship of topology to <i>H. erato</i> chromosomal position, per tree .....                                                        | 134        |
| Fig. S91 Relationship of topology to <i>H. erato</i> chromosomal position, per position bin .....                                                | 135        |
| Fig. S92 Relationship of topology to local recombination rate in <i>H. erato</i> .....                                                           | 136        |
| Fig. S93 Relationship of topology to number of coding base pairs per window .....                                                                | 137        |
| Fig. S94 Relationships of triplet topologies with chromosome length in <i>H. erato</i> clade. ....                                               | 138        |
| Fig. S95 An inversion on chromosome 2. ....                                                                                                      | 139        |
| <b>Supplementary tables .....</b>                                                                                                                | <b>141</b> |
| Table S1 Sample Information.....                                                                                                                 | 141        |
| Table S2 Assembly statistics .....                                                                                                               | 142        |
| Table S3 Mapping to reference.....                                                                                                               | 143        |
| Table S4 Scaffolding with DISCOVAR filled gaps .....                                                                                             | 144        |
| Table S5 Gap-filling output .....                                                                                                                | 145        |
| Table S6 Comparison of general <i>H melpomene</i> de novo repeat content with repeat content of regions used to fill gaps in <i>Hmel2</i> . .... | 146        |
| Table S7 Pairwise coverage.....                                                                                                                  | 147        |
| Table S8 Phylogeny datasets .....                                                                                                                | 148        |
| Table S9 <i>erato</i> clade <i>D</i> -statistics given species tree.....                                                                         | 149        |
| Table S10 <i>melpomene</i> clade <i>D</i> -statistics given species tree .....                                                                   | 150        |
| Table S11 All <i>D</i> -statistics.....                                                                                                          | 151        |
| Table S12 Branch length test tree simulation parameters.....                                                                                     | 171        |
| Table S13 <i>erato-sara</i> clade <i>QuIBL</i> results .....                                                                                     | 172        |
| Table S14 Topology to chromosome size correlation.....                                                                                           | 173        |

## Materials and methods

### Samples

Individuals for sequencing were collected mainly in the wild, while others were from partially inbred stocks (Table S1). For *Heliconius melpomene*, we used a sibling of the strain of the original reference individual for the Hmel1 and Hmel2.5 assemblies (36). We also sequenced parents of a cross between *H. erato* and *H. himera*, and one of their F1 hybrid offspring – the *H. erato* mother was a sibling from the inbred strain used in the *H. erato demophoon* v1 genome (14).

### Genome assembly with DISCOVAR de novo and w2rap

DNA was extracted from each specimen (Table S1). DNA samples were fragmented to ~450 bp and sequenced to at least 60x coverage using paired-end, 250 bp reads on the Illumina Hi-Seq 2500 according to the DISCOVAR de novo protocol (37). The w2rap-contigger was then used to assemble contigs (Table S2). Heterozygous genomes such as these yield complex assembly graphs where loci fail to collapse into a single representation and instead are often expanded into two alternative alleles (Fig. S1, left side). To overcome this problem, we filtered initial contigs to create a collapsed mosaic of haplotypes where each locus is represented by only one of the alternative alleles, ignoring phase, using the following procedure:

- 1) Homozygous content was selected using frequency of kmer spectra (38); this is content shared by both haplotypes and in a mosaic collapsed scenario should be included only once in the solution.
- 2) Initial contigs were sorted by size and filtered one at a time starting from the longest.
- 3) A tally was kept for all included content and resulting contigs were filtered by comparing the content that they had from the selected unique set and not already included in the final set. If a contig contained mostly kmers already included in the final set this contig was marked as complementary and saved in a separate file.

This method will for the most part result in inclusion of only one alternative allele at each locus in the final set of contigs. This filtered set of contigs with a putative single representation for each locus was then further scaffolded, using the same paired-end sequence data, with SOAPdenovo2 scaffolder (39) (Fig. S1, right side)

### Assembly quality assessment

We used a custom python script (genomeStats.py) employing standard formulae to extract the number of contigs, their lengths, and N50 scores. In order to estimate heterozygosity, we used the k-mer based method GenomeScope (40). This online tool uses the output of jellyfish (41), which we ran with the commands

```
jellyfish count -m 15 -o <count output> -s 2000M -t 16 -F 2 -C <(zcat <readSfastq>) <(zcat <reads2.fastq>)>
jellyfish histo -t 16 <count output> > <hist output>
```

We characterized the repeat content with RepeatMasker v4.05 (42). For each genome, we used the command

```
RepeatMasker -pa 4 -species hexapoda -xsmall -nocut <genome.fa> .
```

We include full results on Dryad.

We used BUSCO\_v2 (43) with the arthropoda\_odb9 database to compute the percentage of complete, partial, duplicated, and missing genes in our genome assemblies. Specifically, we used the command:

```
BUSCO.py -i <genome fasta> -c 32 -m geno -l arthropoda_odb9 -sp heliconius_melpomene1 -o <output file> -r
```

We summarized the data with BUSCO\_plot.py, using R to display the results.

### Alignment

w2rap Genomes with fewer than 50,000 scaffolds were aligned with previously published, representative genomes from across the lepidopteran phylogeny using progressiveCactus (44). This tool generates pairwise alignments in cactus graph format between each pair of sister species, generating inferred ancestral sequences. It iteratively continues this process for each node of an input phylogeny, generating blocks of aligned homologous sequence among all input genomes. This process allows alignment blocks to be projected onto the coordinates of any genome assembly and produces little bias towards segments highly similar to any one reference genome. All configuration files are available on Dryad, and additional information can be found in Supplementary Information Section 3.

### Phylogeny

#### *Species tree construction*

We extracted nine different datasets to compute species phylogenies, consisting of two main types of data. First are "fully-aligned blocks". These were divided into coding and non-coding, as well as full Lepidoptera and Heliconiini, but all were filtered in the same way. Specifically we used the tool hal2maf from the haltools suite (45) to convert the hal-format multi-genome alignment into Multiple Alignment Format (MAF), with *H. melpomene* Hmel2.5 as the reference. This MAF file contains a separate "alignment block" for each homologous segment in the multi-species alignment. We filtered these alignment blocks for unambiguously aligned regions using phast tools (46) and a custom python script (getSingleCopy.py). We retained any alignment block in which all species of interest were represented by a single sequence. If either of these two criteria were not met, the entire alignment block was rejected. Genomic coordinates in BED format were intersected with coding sequence entries in the Hmel2.5 annotation file to separate coding from non-coding blocks. Finally, each filtered alignment was converted to fasta using msa\_view from the phast suite. Before estimating gene trees, we further filtered our alignments for those with at least 10 phylogenetically informative sites.

The second set of data are gene alignments. We first extracted gene models from the Hmel2.5 annotation file with UCSC Kent binaries (47), then used the resulting gene model bed file to extract hal alignments to MAF. Next, we applied the unambiguous alignment filter detailed above, and further filtered the dataset so that included only loci that included all species, were 150 base pairs or longer, and had 10 or greater parsimony informative sites. This filtered set of alignments were then masked using Aliscore (48) and then trimmed using AliCUT (49)

For each of the nine datasets, we first estimated individual locus maximum likelihood trees (for gene-based trees, each locus consisted of all coding sequence within each gene, while the block trees were single contiguous stretches of fully-aligned sequence). We selected the best model for each locus using ModelFinder as implemented into IQtree (50, 51). Following model selection, we estimated the best ML tree and 1000 ultra-fast bootstraps using IQtree (52). Since it is well known that, due to ILS, individual gene trees can be discordant with the species tree, we used a coalescent based method, ASTRAL (53), which accounts for discordance among gene trees, to generate species trees. ASTRAL takes individual gene trees as input and generates a species tree estimate by searching for the species tree that is most congruent with quartets garnered from the input gene trees. Using the resulting best ML trees from each locus as input, we generated species trees in ASTRAL (53). For each dataset, we also generated concatenated supermatrices using FASconCAT v.1 (54). We selected models for each supermatrix, first by searching for the best partitioning scheme using the relaxed clustering algorithm implemented in IQtree, using the individual loci as the starting data blocks, and second, by estimating substitution models for each partitioning scheme subset using ModelFinder. We then used the best fit model partitioning scheme to estimate maximum likelihood trees on the supermatrix. For each data set we performed 10 ML searches, five with parsimony starting trees and five with random starting trees in IQtree and chose the topology with the best maximum likelihood score.

#### *DensiTree construction*

We defined 10 kb non-overlapping windows on the *H. melpomene* (13) chromosomal scale using the *makewindows* tool in bedtools v2.1 (55). We then translated the chromosomal coordinates to scaffold coordinates using *bedtools intersect*, and extracted alignments from each window using *hal2maf* from the haltools suite (45). We filtered the MAF alignments for alignment blocks that were present as a single copy with a custom python script (*getSingleCopy.py*). We converted the MAF files to fasta with *msa\_view*, and reconstructed phylogenetic trees with IQTree, using the GTR model and with 1000 bootstrap replicates. After obtaining a single best tree for each window, we filtered for windows with a final alignment length of  $\geq 2000$  bp, mean bootstrap support for the tree  $\geq 80$ , and fewer than 25% total missing sites. We then sampled 500 trees and visualized them with *ape* v5.1 (56) in R. Summary statistics were calculated using code modified from

[https://github.com/mmatschiner/tutorials/blob/master/analysis\\_of\\_introgession\\_with\\_chromosome\\_length\\_alignments](https://github.com/mmatschiner/tutorials/blob/master/analysis_of_introgession_with_chromosome_length_alignments)

#### Introgession analysis

##### *ADMIXTOOLS*

We first extracted MAF alignments of each scaffold from the HAL-formatted whole genome alignment using the *hal2maf* command from the haltools suite (45), with the *H. melpomene* Hmel2 genome as reference. We then converted from MAF to FASTA using the *msa\_view* tool from the PHAST toolkit (46) FASTA to VCF using *snp-sites* (57), and finally VCF to



EIGENSTRAT using the *vcf2eigenstrat* tool from the *gdc* suite. Scaffold positions were converted to chromosomal positions using a custom python script (*scafNamesToNums.py*). Sites were included if they were present in all species (i.e. no missing data or gaps) as a single copy, bi-allelic SNPs. This resulted in a set of 6,671,421 SNPs.

We computed all possible *D*-statistics using the *qpDstat* command with default parameters, and considered all triplets of the 13 *Heliconius* species, holding *E. tales* constant as the outgroup. We assessed significance through a block-jackknifing approach as implemented in *Admixtools* (11), and applied a Bonferroni correction to assign significance at the 95% confidence level to a *p*-value of  $1.37 \times 10^{-4}$ , which corresponds to a *Z*-score of 3.81.

#### *Sliding window tree building*

Trees were inferred as described in "*DensiTree construction*", except that windows were 50 kb in length with start sites 25 kb apart on the *H. erato demophoon* v1 (14) chromosomal scale. In addition, a minimum of 5 kb of fully-aligned sites was required in order for a window to be used. After obtaining a single best tree for each qualifying window, we categorized them by topology with a custom python script (*findCommonTrees.py*) and visualized the results in R using the package *karyoploteR* (58).

#### *PhyloNet*

Due to computational limits, we were unable to analyze the whole *Heliconius* data set at once. We therefore divided our analysis into the *erato* and *melpomene* clades. When analyzing the *erato* clade, we used the *H. erato demophoon* genome v1 (14) as our reference, and when analyzing the *H. melpomene* clade, we used Hmel2 as our reference (19). We defined 10 kb windows, spaced 50 kb apart using the *makewindows* tool in *bedtools* v2.1. This was done to yield approximately independent of 10 kb windows; linkage disequilibrium blocks in *H. melpomene* are about 10 kb long, with virtually all disequilibrium lost by 100 kb (36). We then extracted MAF alignments of each region from the whole-genome alignment using the tool *hal2maf*. We considered only single-copy regions, and filtered for windows with at least 1000 bp aligned among all species. This resulted in 5445 usable *erato* clade windows and 3208 *melpomene* clade windows. Because of computational constraints, we were only able to include a subset of the alignments in a single run of the *PhyloNet* v3.6.7 program *MCMC\_Seq*. We therefore ran 100 iterations of the program for the *melpomene* clade and 150 for the *erato* clade, each time sampling 100 random loci without replacement. We ran a 10,000,000-iteration chain with a 2,000,000-iteration burn-in, sampling every 5,000 iterations. We also included two hot-chains of scale 2.0 and 3.0, and specified the maximum number of reticulations as 6. We generated consensus networks from these results in a method fully outlined in Supplementary Information Section 6.

#### *Topology distribution*

Trees were inferred as described in "*DensiTree construction*". To determine the fraction of each tree topology on each chromosome, we divided the number of windows that recovered the given topology by the total number of windows that successfully resolved any topology on that chromosome. For the distance to end of chromosome, we used the center of each window as the reference point and calculated the number of base pairs between that reference and the nearest edge. We then divided each chromosome into 10 equally-sized bins and calculated the fraction of each bin that recovered each topology in each chromosome independently. We assigned each of our 10 kb windows a local recombination rate (14) by intersecting the window positions with the

recombination map using bedtools (55). We then split the windows into bins based on their local recombination rate, and calculated the fraction of each bin that recovered each topology, again evaluating each chromosome separately. Finally, we used the gene annotations from *H. erato demophoon* v1 (14) to determine the number of coding bases in each 10 kb window. We found that the number of coding bases per window was distributed approximately exponentially, so we log-transformed the data before dividing it into bins. We then determined the topology distributions per bin per chromosome as above.

### Recombination rate estimates

We estimated fine-scale variation in recombination rate along the *H. erato demophoon* chromosomes from linkage disequilibrium in population genetic data using LDhelmet v1.7 (59). Genotypes were called from whole genome resequencing data of ten *H. erato demophoon* individuals from Panama obtained from Van Belleghem et al. 2017 (14) using the Genome Analysis Tool Kit Haplotypecaller (60) with default parameters. Individuals' genotypes were subsequently phased along each *H. erato demophoon* reference genome scaffold using Beagle v4.1 (61) with default parameters. For further analysis, phased genotypes were retained only if they had a minimum depth (DP)  $\geq 10$ , maximum depth (DP)  $\leq 100$  (to avoid false SNPs due to mapping in repetitive regions), and for variant calls, a minimum genotype quality (GQ)  $\geq 30$ . Next, from the phased genotypes, fasta sequences were generated for 50 kb windows. These 50 kb windows were transformed to haplotype configuration files with the recommended window size of 50 SNPs used by LDhelmet to estimate composite likelihoods of the recombination rate. From the haplotype configuration files, lookup tables for two-locus pairwise recombination likelihoods and Padé coefficients were generated within the recommended value range. Transition matrices were calculated for each chromosome separately by comparing genotypes obtained from *H. erato demophoon* to the outgroup species *H. ricini*, *H. sara*, *H. telesiphe*, *H. clysonymous*, *H. hortense*, *H. hermathena* and *H. charithonia*. The likelihood lookup tables, Padé coefficients and transition matrices were used in the rjMCMC procedure of LDhelmet to estimate the recombination map. In this latter step, 1,000,000 Markov chain iterations were run with a burn-in of 100,000 iterations, a window size of 50 SNPs and block penalty of 50. For convenience, recombination rate estimates ( $\rho$ ) were converted to cM/Mb by scaling values for each chromosome according to the map length of each chromosome as obtained from pedigree data.

### Triplet Gene Tree Test

We first calculated "gene trees" for 5 kb abutting loci (windows). In order to mitigate linkage between loci, we sampled roughly 10% of the loci for our analysis. We then split each full gene tree into its component triplet topologies, determined the outgroup for each triplet, and calculated the internal branch length. We next grouped each set of branch lengths by triplet and by outgroup, and for each subset determined the likelihood that the branch lengths were best described by a simple exponential distribution as expected under ILS or a mixture of ILS and either introgression or speciation processes. The full method is detailed in Supplementary Information Section 7.

### Simulations

Simulations were performed in ms (62) and msPrime (63). For each simulation, 1000 independent loci were generated using the parameters detailed in Supplementary Information

Section 7. From the tree outputs, sequences were generated for each locus using seq-gen (64). D and  $f_d$  statistics, as well as maximum likelihood trees (65) were then calculated from the sequence data using scripts from [https://github.com/simonhmartin/genomics\\_general](https://github.com/simonhmartin/genomics_general). Confidence intervals were generated by calculating means from random samples of 500 loci with replacement 100 times. We report the maximum and minimum values from those bootstrap samples. Similarly, QuIBL confidence intervals were generated by randomly sampling trees from 500 loci, using those as inputs to QuIBL, and reporting the maximum and minimum introgression fraction.

#### Mapping inversions

We first identified regions of interest (ROI) based on the coordinates of the first and last windows that displayed the altered tree topology. We then used the command *halLiftover* from the haltools suite to identify the contigs of each species that mapped to the ROI. We used a custom python script (pslToBed.py) to extract the relative positions of each alignment block on each contig and filtered for those that had segments aligned in both directions in the region of interest. We inspected these candidate contigs manually with IGV (66) and identified those in which the beginning of the contig mapped in one direction to one side of the ROI, and the end mapped in the opposite direction to the other side of the ROI. We used the coordinates where the contig alignments terminated as candidate breakpoints, and manually inspected all contig alignments for those that mapped across the breakpoints in a single direction.

**Supplementary Text****Section 1. *DISCOVAR de novo/w2rap* Assembly and Quality**

---

As stated in the main text, our initial assemblies contained many uncollapsed haplotypes, so that single-copy genomic loci actually appeared multiple times in k-mer plots (Fig. S1, left side). We used the protocol detailed in the main text methods to collapse those haplotypes in the final assembly (Fig. S1, right side).

We assessed the quality of our *de novo* assembled genomes by calculating standard metrics including N50, number of contigs, repeat content, and gene content. These values can be found in Table S2. N50 values reported here are relatively low compared to published *Heliconius* genomes due to the fact that they were assembled solely using short-read Illumina sequencing, and the number of contigs is relatively large for the same reason. Both of these metrics were quite variable, with N50 values ranging from 21,413 to 106,325 and number of contigs ranging from 17,678 to 62,414. We investigated whether the variation in contiguity could be explained by repeat content by evaluating each *de novo* genome with RepeatMasker (42). The distribution of repeat content appeared bimodal, with most *melpomene* clade species containing roughly 15% masked bases and most *erato* clade species containing 18-22% masked bases. However, there was no correlation between repeat content and N50 (Fig. S2).

Another possible factor contributing to variation in contiguity is heterozygosity. Heterozygosity may have been especially important, as *Heliconius* species generally have 1-5% heterozygous sites, and most of our specimens were wild-caught rather than inbred. We estimated heterozygosity using the k-mer based GenomeScope method (40), but found no correlation between heterozygosity and N50 value (Fig. S3). The only variable we tested that was correlated with N50 was contig number which, if genome sizes are comparable, is as expected (Fig. S4).

We further assessed the quality of the genome assemblies by aligning the *H. melpomene* and *H. erato* w2rap genomes to their respective reference assemblies (14, 19). We examined the coverage of the w2rap assembly on the previously published reference and vice versa and found that on average the w2rap assemblies covered 94 percent of the reference genomes, while the reference genomes covered 91 percent of the w2rap genomes (Table S3). The discrepancy is likely due in large part to a difference in total assembly size. The *H. melpomene* w2rap assembly is 14 Mb (5.2%) larger than Hmel2, and the *H. erato* w2rap assembly is 58 Mb (15%) larger than the *H. erato demophaon* reference. This difference cannot be explained purely by overrepresentation of repetitive elements, as the overall proportion of the genome identified by RepeatMasker as repeats is almost identical between the conspecific assemblies (42). It is more likely that the larger w2rap genome sizes are caused by uncollapsed haplotypes due to stringent thresholds employed in w2rap for collapsing heterozygous regions. This hypothesis is further supported by the observation that the F1 interspecific hybrid individual (*H. erato/H. himera* hybrid) has by far the largest total assembly size among *Heliconius* species and by BUSCO analysis showing slight increases in duplicated genes relative to high quality lepidopteran assemblies, as well as to other w2rap assemblies (Fig. S5) (43).

Apart from genomic coverage, we also queried whether w2rap contigs contained assembly errors by mapping all scaffolds greater than 1000 bp of the *H. melpomene* w2rap genome onto its

conspecific reference Hmel2. In order to assess alignment quality, we scored each contig according to the following scale. Colors in parentheses correspond to those in Fig. S6-Fig. S8:

*Unique Map* (dark green): The entire w2rap contig maps as a block to a single location in the genome.

*All Inside* (light green): The alignment of the contig may be broken into multiple blocks, but more than 95% of the contig maps to a single location defined by projecting the ends of the contig out from its highest quality alignment block.

*>75% inside* (yellow): More than 75%, but less than 95% of the contig maps to a single location as defined above.

*>50% inside* (orange): More than 50%, but less than 75% of the contig maps to a single location as defined above.

*>50% Scaffold* (pink): Fewer than 50% of the contig maps to a single location, but more than 50% of the contig maps to a single scaffold.

*<50% Scaffold* (red): There is no scaffold in which more than 50% of the contig maps.

*2X Duplicated* (sky blue): entire contig maps to exactly 2 locations in genome.

*<=5X Duplicated* (blue): entire contig maps to 3-5 locations in genome.

*>5x Duplicated* (dark blue): entire contig maps to at least 5 locations in genome.

We expect that each contig should map to a unique location in the reference, and we find that to be the case for 4,540 contigs (38% of contigs, 45% of genome size). We find that an additional 4,827 contigs (41% of contigs, 49% of genome size) map primarily to a single contig but not a single location (Fig. S6-Fig. S8). These cases could indicate that the w2rap contigs contain repetitive elements, are chimeric in content, or were able to bridge a gap in the reference assembly. We developed a method to identify regions that were likely in the latter case and successfully used the w2rap assembly to patch gaps in the Hmel2 reference (Supplement Section 2). A similar successful approach had also been adopted using our first pass *DISCOVAR de novo H. erato* assembly by the team assembling the *H. erato demophoon* reference genome (14).

*Conclusion: comparison of DISCOVAR/w2rap with other assembly methods*

This 20 genomes project was designed in 2013, testing how a then-novel, low-cost, short-read-only genome sequencing and assembly methodology (DISCOVAR *de novo*), might aid comparative genomics in non-model organisms such as *Heliconius*. The DISCOVAR assembler was originally designed as a variant caller for the human genome (67), but was later extended and upgraded to allow whole genome assembly for large genomes, under the name DISCOVAR *de novo* (37). More recently, DISCOVAR *de novo* (68) and a successor assembly method, w2rap (69), have been used to aid assembly of complex polyploid plant genomes, such as hexaploid wheat (70, 71). These methods attempt to push low cost, short read sequencing to assemble very high quality contigs, by taking advantage of low cost, high sequence read accuracy, and relative computational simplicity of a single PCR-free library type with relatively long Illumina reads (2 x 250bp paired end).

As can be seen from the results above, w2rap used on the basic DISCOVAR protocol sequence data for *Heliconiini* was successful in assembling contigs of up to N50 lengths of ~ 20-100 kb (Table S2), but presumably due to the presence of perfect repeats longer than ~ 500 bp, failed to obtain greater contiguity. Nonetheless as we show below (Section 2), w2rap contigs can successfully be used to patch a substantial fraction of gaps found in traditional mixed library projects (e.g. Illumina, mate pair, and PacBio). In our case, these were the reference assemblies, *Heliconius erato* (14) and *Heliconius melpomene* where 30% of gaps could be patched (Section S2 below). We demonstrate below that this is because higher fidelity sequencing of imperfect repeats or low complexity regions by DISCOVAR complements the longer scaffolds obtainable by mixed library methods. We believe that this may be because higher levels of base-call errors from platforms like PacBio are very difficult for assembly methods to distinguish from imperfect repeats, at least without the added cost of very high PacBio or other long-read coverage. PCR-free Illumina-based sequencing protocols such as in DISCOVAR thus have the potential to provide low cost supplements to these more conventional mixed library projects, especially in complex genomes with many imperfect repeats (see also (71)).

Today, the Illumina HiSeq 2500 platform capable of sequencing 2x250bp reads upon which DISCOVAR was originally built is obsolete, and the purpose specific library construction pipeline at The Broad Institute is no longer supported. But PCR-free libraries of similar characteristics have become the current standard, and the 2x250bp reads in Illumina platforms have returned with the Illumina Novaseq, due to their sustained use in both small structural variant detection and assembly. Assembly of short read sequence data is often aided these days by longer range technologies: long-reads such as PacBio and Oxford nanopore, linked reads (e.g. 10X), or Hi-C (72), but short-read data remains a feature of most sequencing projects for its higher consensus accuracy. With PCR-free libraries now commonplace, and 2x250bp reads re-introduced with an even lower cost in the new Illumina platforms, we expect these analysis methods to co-exist with longer-range technologies for the time being.

## Section 2: Scaffolding With *DISCOVAR*

The assemblies in this study were generated with high coverage, PCR-free sequencing. One advantage of this strategy is that slightly imperfect repeats can be distinguished more readily than in traditional assemblies that must account for PCR errors and base call uncertainty. Generally, contigs tend to "break" when they encounter repetitive elements, and if *w2rap* is more efficient at assembling these areas, we should be able to link contigs within scaffolds with the *de novo* assemblies. In fact, we may be able to correct ordering and orientation errors as well, but here we focus minimally on gap-filling between contigs. We developed a pipeline "Scaffolding With *DISCOVAR*" (SWD) for this purpose, though it can be used with any pair of assemblies and is not limited to *DISCOVAR/w2rap*. Code is available at [www.github.com/nbedelman/ScaffoldingWithDiscovar](http://www.github.com/nbedelman/ScaffoldingWithDiscovar). SWD was designed with the assumption that one assembly has high-confidence scaffolding but some gaps ("reference genome"), and the other has high-confidence base-call quality but is not well scaffolded ("filler genome"). The flow chart for this process is shown in Fig. S9 and is composed of 4 major steps. Below we give an explanation of the process assuming one is attempting to fill gaps between contigs within scaffolds. The tool will also be useful for ordering and orienting scaffolds, but these functionalities are still under development as of this writing. The commands below can be altered to fill gaps between scaffolds within chromosomes by simply replacing "chromosome" for "scaffold" and "scaffold" for "contig".

### *Step 1: Preparing the data*

SWD takes:

- 1) a reference genome fasta with a sequence for every scaffold and containing a string of Ns between each contig,
- 2) a reference genome fasta with a sequence for every contig,
- 3) a map in bed format indicating the location of each contig on its respective scaffold, and
- 4) a filler genome.

If a user has (1), the scripts "*makeGenomeMap.py*" (SWD script) and *bedtools getfasta* (from the *bedtools* suite) will convert such reference genome FASTA files into (2) and (3). *makeGenomeMap.py* is capable of dividing a genome either at regions of *at least* a given number of N's (default) or a specific number of Ns (flag "exact").

### *Step 2: Aligning the filler genome to the reference genome*

This pipeline was developed using *LAST*, but any aligner can be used so long as the output is in MAF format (45). The SWD package has wrapper scripts for building a genome index and running the *LAST* aligner (*SWD.py genomeBuild* and *SWD.py lastAlign*), which are optional but hopefully useful. After the genome has been aligned, the pipeline follows the chain and net protocol developed by UCSC, which can be read in more detail here (46). This ensures that we are examining the location of best alignment for each filler genome contig on the reference genome.

### *Step 3: Filtering for contigs that may be useful in gap-filling*

We convert the resulting MAF alignments into specially-formatted BED files. Specifically, each BED file is comprised of the alignment location of a single filler genome contig and contains information as to which part of the contig aligns to which reference region, and provides a score based on how contiguous the full contig alignment is. The scoring strategy begins by projecting

the location of the end points of the contig out from the longest sub-alignment. For example, if a *DISCOVAR* contig is 10 kb in length, and its longest sub-alignment begins at contig position 2000 and ends at contig position 5000, and maps to a reference scaffold from positions 102000 to 105000, the projected position would be from reference scaffold 100000 to 110000 (Fig. S10-S11). The contig would then be scored as follows:

- 10: The contig maps as a single alignment to a single location in the reference genome
- 9: The contig maps as multiple sub-alignments, but at least 95% maps within the projected region
- 8: At least 75% of the contig maps within the projected region
- 7: At least 50% of the contig maps within the projected region
- 6: At least 50% of the contig maps to the same scaffold as the longest sub-alignment
- 5: Less than 50% of the contig maps to the same scaffold as the longest sub-alignment
- 4: The entirety of the contig maps to exactly two locations in the reference genome
- 3: The entirety of the contig maps to 3-5 locations in the reference genome
- 2: The entirety of the contig maps to more than 5 locations in the reference genome

Contigs whose score ranges from 6 to 8 are retained for the next step.

#### *Step 4: Gap Filling*

This step takes as input the bed files of contigs that passed the filter in step 3, the fasta file of reference genome contigs, and the fasta file of the filler genome contigs. For gap filling, as was done here, the flag "consecutiveOnly" must be set to True. The procedure in this step is as follows:

First, we identify groups of reference contigs and filler contigs that are linked together. For example, if filler contig 1 overlaps with reference contigs A and B, and filler contig 2 overlaps with reference contigs B and C, reference contigs A, B, and C, and filler contigs 1 and 2 would form a group. Next, we consolidate sub-alignments that are collinear and neighbor one another on a single reference contig. Once the sub-alignments are consolidated, we form super-contigs by joining together all the reference contigs that can be linked by each filler contig. In order to approve a link, there must be at least 1000bp of aligned sites on each of the reference scaffolds, and the order and orientation must be correct. This means that for reference contigs A and B to be linked by filler contig 1, the beginning of filler contig 1 must overlap the end of reference contig A by at least 1000bp, and the end of filler contig 1 must overlap the beginning of reference contig B by at least 1000bp. Once the super-contigs are made with the information from each individual fill contig, the super-scaffolds within a group are linked together in a similar manner. In each case, the end of the reference contig being joined will be replaced by the filler contig that overlaps it. This ensures contiguity across the gap and reflects the heuristic that the per-base accuracy of the filler contig is more trustworthy in these areas than the reference contig (Fig. S11-S12, Table S4).

In this study, we filled gaps solely within reference scaffolds. Taking a conservative approach, in which we assumed that the published order of contigs was correct, we were able to fill 30% of gaps (899/2990 stretches of  $\geq 100$  Ns) and increased the contig N50 by 39%. The overall genome size was reduced by 97 kb, after a reduction of 248 kb of Ns (Table S5). A similar approach was previously employed to use *DISCOVAR* data to fill gaps in the *H. erato*



*demophoon* v1 reference genome (14), resulting in a 12x improvement in N50. We examined the regions of the w2rap contigs that were inserted into the reference genome and found that they were more than twice as rich in repetitive elements as the full genome. This elevation was driven primarily by retroelements (15.69% of inserted sequences, 1.52% of whole genome) and small RNAs (9.41% of inserted sequences, 0.02% of whole genome). Interestingly, the abundance of DNA transposons decreased in inserted regions, comprising just 4.72% as opposed to 10% in the whole genome (Table S6). In order to confirm that our scaffolding procedure was not collapsing tandem repeats into single elements, we calculated read coverage in 10 kb windows and compared the mean coverage of gap-filled regions to that of other genomic loci. We found that the distribution of coverage depth was similar between the two groups, consistent with valid contig joins (Fig. S13-Fig. S15). The transposon content of these genome assemblies has been studied in great detail; see Ray *et al* 2019 (73)

### Section 3: progressiveCactus Alignment

We generated a multi-species whole genome alignment using progressiveCactus (44). In order to create a high-quality alignment with power to detect evolutionary change at the root of the *Heliconius* clade, we filtered *de novo* *Heliconius* assemblies for those with fewer than 50,000 scaffolds, and further filtered the resulting assemblies for scaffolds larger than 1000 base pairs. We included previously published Lepidoptera assemblies including three additional species in the family *Nymphalidae* (*Melitaea cinxia* v1.0 (74), *Bicyclus anynana* v1.2 (75) and *Danaus plexippus* v3 (76)), one additional butterfly (*Papilio polytes* v1.0 (77)), one skipper (*Lerema accius* v1.1 (78)), and two moths, (*Bombyx mori* ASM15162v1 (79) and *Plutella xylostella* DBM\_GJ\_v1.1 (80)). Genome size filtering was performed with a custom python script (filterGenome.py).

In order to run progressiveCactus on the Harvard Odyssey compute cluster, modification of the program was carried out by Harvard Research Computing to integrate with the SLURM scheduler. The modified version we used can be found here:

<https://github.com/harvardinformatics/progressiveCactus> .

The final alignment was run with the command

```
runProgressiveCactus.sh <sequence file> <work directory> <hal output file>
--batchSystem=slurm \
--slurm-partition=serial_requeue \
--slurm-jobname <job name> \
--slurm-scriptpath=<batch script path> \
--slurm-time=1440 --slurm-constraint='holyib' \
--defaultMemory=6000000000 --bigMemoryThreshold=5000000000 \
--retryCount=3 --bigBatchSystem=singleMachine \
--configFile=local_config.xml \
--maxThreads=32 \
--logLevel=DEBUG \
--stats
```

All config files are available on Dryad.

In order to assess the success of the progressiveCactus alignment, we calculated pairwise alignment coverage between all species and *H. melpomene* Hmel2.5 (13) (Fig. S16, Table S7). We also computed cumulative ‘alignment depth’ using *H. melpomene* and *B. mori* as reference sequences. The cumulative alignment depth is a measure, calculated for each number between 0 and the total species in the alignment, of the percent of the reference genome that is aligned among at least that number of species (Fig. S17, Fig. S18).

## Section 4: Phylogeny

This data and the resulting alignment comprise a truly genome-wide dataset that we used to infer phylogenies on multiple subsets of the data. In general, we analyzed three different data sets: full genes, fully aligned sites (defined as sites that contain a nucleotide for each species in the alignment) that are coding, and fully aligned sites that are non-coding. For the block alignments, we generated the same data sets for only those taxa included in Heliconiini (*Heliconius* species plus *Agraulis* and *Eueides*) (Table S7), and we further partitioned these data into regions greater than or equal to 100 base pairs, and greater than or equal to 150 base pairs. For the gene set, we removed all genes that had missing taxa, were shorter than 150 base pairs, and had fewer than 10 parsimony informative sites. In order to identify sites from the alignment that could mislead phylogenetic analysis due to random signal, we used Aliscore (48). Aliscore performs Monte Carlo resampling within a sliding window across the alignment and identifies regions of the alignment that are indiscernible from randomly generated sequence. Those regions were then removed using AliCUT v2.31 (49).

For each data set, we generated single locus trees, ASTRAL "species" trees (using the single locus trees as input), and concatenated trees. For each single locus tree, we used IQtree v. 1.6.1 to estimate the model (using the ModelFinder function in IQtree), the tree, and 1000 ultrafast bootstraps (command: `iqtree -s <alignment> -m MFP -bb 1000 -safe`) (50-52). For each concatenated species tree, we used IQtree v1.6.5 to:

- (1) select an optimal partitioning scheme using the relaxed clustering algorithm (command: `iqtree -s <alignment> -spp <partition_definition> -m TESTMERGEONLY -rclusterf 5 -rcluster-max 5000 -mset GTR -nt 48`),
- (2) select optimal models for each subset in the partitioning scheme selected from the previous run using ModelFinder, followed by a ML tree search and 1000 ultrafast bootstrap (command: `iqtree -s <alignment> -spp <partition_definition>.best_scheme.nex -m MFP -nt 24 -safe -bb 1000`), and
- (3) conduct 15 additional ML searches for each concatenated data set using the relaxed clustering + ModelFinder partitioning scheme generated in step 2 (command for each search: `iqtree -s <alignment> -spp <partition_definition>.best_scheme.nex -nt 24 -bb 1000 -safe`). For each set of trees, we selected the tree with the best maximum likelihood value.

As mentioned in the main text, trees generated from all methods were largely congruent. However, there were some interesting differences between phylogenies inferred from each dataset. To aid interpretation and allow for direct comparison of tree topologies, we have summarized the support for each node of the consensus phylogeny in graphical format, shown in Fig. S19 and Fig. S20. In addition, one region of the tree was so poorly resolved that we maintained it as a polytomy in Fig. 1A. Specifically, monophyly of the traditional silvaniform group is supported by both analyses using full genes, but only a small subset of analyses that used fully-aligned blocks. In contrast, the clade *H. pardalinus* + *H. melpomene* subgroup is supported by almost all analyses that rely on fully-aligned coding blocks, and a topology with *H. besckei* basal to the other silvaniforms + the *H. melpomene* group is supported in a set of fully-

aligned coding blocks using a coalescent approach (Fig. S20 B). In addition we display node support based on the number of non-overlapping windows that contain each node. We restrict this data to those alignments  $\geq 2$  kb and with  $\geq 80\%$  bootstrap support, as in the heat map on Fig. 1A. A DensiTree figure with branch length information discarded highlights the relative frequency of each type of topology observed (Fig. S21). We summarize these resulting datasets by calculating the alignment length (total sites in the alignment), number of fully-aligned sites (sites with a nucleotide present for each species), mean bootstrap support, number of phylogenetically informative sites, total percent missing data, and probability of internal recombination ( $\delta I$ ) (Fig. S22-Fig. S33)

All inferred species trees are shown individually in Fig. S34-Fig. S51.

## Section 5: *D*-statistics

We calculated *D*-statistics for all 364 triplets of the selected 14 *Heliconius* species, holding *Eueides tales* constant as the outgroup (we excluded the two w2rap assemblies that were conspecific with a reference genome). For each triplet, we calculated the *D*-statistic for all three possible species topologies. The distribution of the lowest *D*-statistic score for each triplet are shown in Fig. S52, and the corresponding Z-scores are shown in Fig. S53. Excluding the hybrid, which is inappropriately included as a "species" in a test for gene flow, we had 286 triplets total; this value is therefore reported in the main text.

To ensure our analysis was not biased due to aligning the genomes with a guide tree, we calculated *D*-statistics for the same set of species using an alternative progressiveCactus alignment with a guide tree that reflects a different order of branching in the uncertain silvaniform clade (42). In addition, the two alignments differed in species composition. The "LepBase" alignment included all genome assemblies, including those of low quality (accessed from lepbases.org). The values for the two alignments within each clade were very highly correlated, indicating no strong effect of the input guide tree on these results (Fig. S54, green points). Across clades, the correlation was not perfect, particularly when the *H. doris* genome was one of the samples (Table S9-Table S11, Fig. S54, blue points). Anomalies over longer evolutionary distances are expected, as the *D*-statistic was developed to examine very similar populations and assumes only a single mutation per polymorphic site. In addition, this deviation from the main correlation did not affect our downstream analyses, as we focused only on within-clade alignments.

Consistent with our other analyses, the strongest *D*-statistic we observed in the *erato-sara* clade was using the topology (*E. tales*, (*H. telesiphe*, (*H. hecalesia*, *H. erato*))) (Table S9). Here, the statistic was strongly negative, implying introgression between *H. telesiphe* and *H. hecalesia*. This helps to explain the discrepancy between the consensus species tree, in which *H. hecalesia* groups with *H. himera* and *H. erato* as in earlier studies, and the PhyloNet base topology, in which *H. telesiphe* and *H. hecalesia* are sisters (Fig. 1C). In addition, we find evidence for an association between both *H. telesiphe* and *H. hecalesia* with *H. sara* and *H. demeter*. This is consistent with the introgression proposed for the chromosome 15 inversion, and with the deep introgression event inferred by PhyloNet (Fig. 1C).

In the *melpomene*-silvaniform clade, the strongest *D*-statistic implied gene flow between *H. melpomene* and *H. pardalinus* to the exclusion of *H. besckei* (Table S10). Again, this is consistent with the network proposed in Fig. 1B, where *H. pardalinus* is inferred to have introgressed with the ancestor of *H. melpomene* + *H. cydno* + *H. timareta*. When examining the three silvaniform species, none of the possible topological relationships yields a *D*-statistic below 0.11, or a Z-value below 31. These high values imply that there is not a truly tree-like relationship among these species, consistent with our inability to resolve the polytomy shown in Fig. 1A and expanded upon in Fig. S20.

## Section 6: Phylogenetic Networks

As stated in the main text, we used the MCMC\_Seq method of PhyloNet to generate phylogenetic networks for the *erato* and *melpomene* clades separately. The MCMC\_Seq method takes sequence alignments as input, and simultaneously estimates each local gene tree and the species network through the course of its MCMC run. Using sequence alignments in this way incorporates more information than contained in independently inferred gene trees, and in theory requires fewer loci to accurately reconstruct the true species network(12). We started by running 100 iterations of the program using 100 randomly sampled loci each time. We considered all runs in which the final output network had greater than 50% posterior probability, and summarized the results by generating a correlation matrix of those networks based on Luay Nakhleh's metric of reduced phylogenetic network similarity (43). We calculated each pairwise similarity score, and then used the R heatmap function to group all trees by similarity (Fig. S55-Fig. S56). For the *melpomene* clade, there was a single region of tree-space that was strongly supported. However, there were still slight differences among the specific networks represented in that strongly-supported region. Therefore, the most common introgression events are represented as solid red lines in the main text (Fig. 1B), while the less-common events are represented as dashed lines. We feel that this representation captures the uncertainty inherent in this analysis (main text, Fig. 1C). However, the *erato* clade was less clear, and we therefore repeated the analysis using 150 loci per run and doubled the chain length. Still, several regions of tree space seemed equally supported. Upon close examination, many of the differences are simply in direction or timing of introgression events. The clearest structural difference (i.e. change to the backbone tree structure) was that roughly half of the networks infer a base tree that recovers *H. telesiphe* and *H. hecalesia* as a monophyletic clade that admixed with the ancestor of *H. erato* and *H. himera*. The other half recovers *H. hecalesia* as sister to *H. erato* and *H. himera*, and identifies an introgression event either from *H. telesiphe* into *H. hecalesia* or vice versa. The remainder of the uncertainty lies in the timing of the introgression event into the ancestor of *H. sara* and *H. demeter*. Various networks place it at all possible branches of the tree with the exceptions of the *H. erato* and *H. himera* terminal branches. As in the *melpomene* clade, the most strongly supported introgression events are represented by solid lines while less well-supported events are indicated by dashed lines.

We next aimed to test the robustness of the network results by repeating our analysis with other inference methods. A major drawback of the MCMC\_Seq method above is its limitation to small datasets, so we only used a subset of available data in each run, and were only able to combine them after running each set. We therefore used another PhyloNet method, Infer\_Network\_MPL, to corroborate the result. This method uses all loci, but uses inferred gene trees as input data as opposed to sequence alignments (50, 51). The method estimates the network by maximizing pseudolikelihood scores based on those input trees. We inferred gene trees using PhyML (52, 65) from the same set of loci used in the MCMC\_Seq method. In both clades, the major introgression events identified by MCMC\_Seq were also found by Infer\_Network\_MPL, though not always in the same direction (i.e. *H. besckei*-*H. numata* in the *melpomene*-silvaniform clade; *H. sara*/*H. demeter* - *H. telesiphe*/*H. hecalesia* in the *erato*-*sara* clade) (Fig. S57).

Finally, we used the biallelic SNP dataset generated for our *D*-statistic analysis to generate a phylogenetic network with qpGraph (53). We iteratively added taxa to a model according to the following algorithm:

1. Begin with 3 species that have a well-defined, bifurcating history.
2. Add one species ("test taxon") to the tree in its most likely location based on previously published phylogenies and *D*-statistic values.
3. Run qpGraph.
4. If all statistics are equal to 0, return to 2. If not, continue to 5.
5. If the test taxon can be moved to a different location without adding a reticulation node, continue to 6. If not, move to 8
6. Move the test taxon to a different location without adding a reticulation node. The position should be informed by the output of qpGraph.
7. Return to 3.
8. Add a reticulation node whose position is informed by the output of qpGraph.
9. Return to 3.

Continue until all species are included in the phylogenetic network.

This method was successful for the *erato* clade (Fig. S58), because sister species relationships between *H. erato* and *H. himera*, as well as *H. sara* and *H. demeter*, were generally stable. This allowed us to build a backbone tree and vary the placements and admixture events involving *H. hecalesia* and *H. telesiphe* until we had a reasonably well-supported tree. These admixture events included the previously supported events between *H. hecalesia* and *H. telesiphe*, and between *H. telesiphe* and *H. sara+H. demeter*. The backbone tree differs slightly from that inferred by either PhyloNet method, most notably by the placement of *H. hecalesia* as sister to *H. sara+H. demeter*. However, a significant amount of *H. hecalesia* genetic material is inferred to trace its ancestry to its more classical placement as sister to *H. erato+H. himera*. We were also able to infer small admixture events involving *H. demeter*. This differs from the PhyloNet methods, which inferred admixture events involving the ancestor of *H. sara* and *H. demeter*.

Unfortunately, we were not able to use the qpGraph method with the *melpomene* clade. No sister species relationships were stable, and the space of possible models proved too large to search manually.

## Section 7. Quantifying Introgression via Branch Lengths (QuIBL)

---

### 7.1 Introduction

Identifying introgression through its genetic signatures is of interest due to its impact on adaptation and speciation. However, random features such as deep coalescence (also called incomplete lineage sorting, or ILS) can muddy the signal of introgression by generating gene trees which differ from the species tree without any interspecies gene flow. One robust genome-wide approach to detecting introgression is Patterson’s  $D$  statistic, which looks at imbalances in the frequency of discordant gene tree topologies (11). This statistic and related  $F$  statistics can be motivated from a coalescent standpoint (82), and can provide genome-wide estimates of introgression. Our goal in this section is to explain new tests that can be used to obtain more localized information. Specifically, we describe a test that does not rely on topology imbalances, but instead use the additional information in gene tree branch lengths within topologies to locate introgressed loci or estimate the likelihood that a given region displays its gene tree topology due to introgression rather than ILS.

We present a statistical framework for assessing whether a given set of gene trees shows evidence for introgression events or could be generated by ILS alone, as well as for calculating the odds that a given discordant locus was generated by ILS or introgression. The required calculations are unwieldy on the full gene tree, so inspired by the approach of Zairis *et al.* (83), we study the statistics of the set of three-leaf gene subtrees for each gene genealogy in our sample. Rather than consider every relationship in our sample at a particular locus, we take all sets of three terminals in the original tree and examine these triplet trees independently of each other. In particular, we compare the internal branch length of a given triplet at a locus to the genome-wide distribution of branch lengths in that triplet to classify it as likely introgressed or not. We implement this procedure as ‘Quantifying Introgression via Internal Branch Lengths,’ or QuIBL (<https://github.com/michaelmiyagi/QuIBL>). We assess the accuracy of QuIBL via coalescent simulations of gene trees detailed in section 7.5.4, and find that it performs well at inferring both the timing and proportion of introgression from nonrecombining loci. In addition, we compare QuIBL to  $D$ . We use the following notation in the remainder of the section.

---

|                    |                                                                                                                       |
|--------------------|-----------------------------------------------------------------------------------------------------------------------|
| $N_e$              | Effective population size, assumed to be constant through time.                                                       |
| $u$                | Per-site, per-generation mutation rate.                                                                               |
| $\theta$           | $4N_e u$ , the population mutation parameter.                                                                         |
| $EXP(\lambda)$     | Exponential distribution with scale parameter $\lambda$ .                                                             |
| $TEXP(\lambda, C)$ | Truncated exponential distribution with scale parameter $\lambda$ and truncation point $C$ .                          |
| $S_i$              | Time interval during which the species tree has exactly $i$ extant lineages, measured in units of $2N_e$ generations. |
| $H$                | Time back from the present until a hybridization event, measured in units of $2N_e$ generations.                      |

---

Definitions S7.1



## 7.2 Motivation and assumptions

The method detailed in this supplement represents both the use of an alternative type of evidence in the assessment of the likelihood of introgression throughout the genome, as well as a test for introgression in a locus-by-locus manner. A particular innovation of this framework is its assignment of probabilities of introgression for individual loci under the multispecies network coalescent by leveraging expectation maximization, as detailed in section 7.5.1. Methods such as ABBA-BABA use information about the genome-wide frequencies of different site patterns, which give robust results but cannot always resolve local patterns of introgression in the genome, and rely on gene tree asymmetries to infer introgression.

By using information about the branch length distributions detailed in section 7.4, QuIBL only uses the inferred gene tree topology for partitioning the data. This means that each topology of each triplet is tested independently, and consequently we use a different line of evidence than site pattern-based introgression metrics like  $f_d$  (35). Thus, our method can be used in a complementary fashion with these statistics to produce an even more robust picture of the gene flow history of a set of taxa.

The theoretical justification for our method requires the hypothesis that the data take the form of nonrecombining neutral loci; this is standard for multispecies network coalescent resolution methods such as PhyloNet (12). As part of our model, we also assume that population sizes are constant within each individual branch of the multispecies network, as arbitrary changes in population size can create selection-like distortions in the expected distribution of coalescence times.

Via coalescent simulations detailed in section 7.5.4, we demonstrate that when our assumptions about the loci are met, QuIBL is consistently conservative about introgression events, and that the noise added by mutation causes conservative estimation of introgression rates. Additional sequence simulations described in sections 7.5.5 and 7.5.7.1 show that QuIBL is conservative and accurate at recovering the observable introgression fraction under a variety of demographic scenarios and recombination rates both absolutely and relative to  $D$  and  $f_d$ .

## 7.3 Intuition

We model the distribution of the length of the internal branch of a gene tree as a mixture of distributions resulting from the coalescence of two lineages within a branch of the species tree which only they share (e.g. introgression or speciation) and coalescence within the common ancestral population (e.g. ILS). Consider the simple case of a rooted species tree with three terminals. We can use coalescent theory to derive the expected branch length distribution of gene trees generated by that species tree. ILS alone will generate all three topologies with equal frequency and expected branch lengths, since the three lineages are exchangeable once they have reached the ancestral population. In addition to this, the gene tree topology consistent with the species tree is realized when the two sister lineages coalesce within the internal branch of the species tree, and as a result this matching gene tree topology will be both enriched in frequency and contain longer internal branches (Fig. S59).

We condition on the gene tree topology, and focus on the information present in its internal branch. Gene trees generated by ILS will have an internal branch length that follows an exponential distribution with scale parameter equal to one when time is measured in units of  $2N_e$  generations.

If there is no introgression, all discordant gene tree topologies are generated by ILS alone, and will have internal branches sampled from an  $EXP(1)$  distribution. In contrast, the concordant gene tree topology will have internal branches pulled from the distribution  $EXP(1) + S_2 - TEXP(1, S_2)$ , as shown in Fig. S60. Further, as shown in Fig. S61, if introgression has occurred at a locus, we can take the corresponding set of paths in the species network and obtain another distribution of the form  $EXP(1) + C - TEXP(1, C)$ .

The full branch length distribution for a given gene tree topology will be a mixture generated by multiple of these phenomena. Our goal is to use the observed branch length distributions to infer the mixture proportions of gene trees coming from each possible source.

## 7.4 The mixture distribution of internal branches of triplets

So far we have described the internal branch length of a triplet gene tree as  $EXP(1) + C - TEXP(1, C)$  in coalescent units. In reality, branch lengths must be inferred from genetic data, in units proportional to mutations rather than  $N_e$ . We assume that they are measured in units of substitutions per site. If we take mutations to be Poisson distributed along the branches of the genealogy we require a scaling factor of  $\lambda = \theta/2$ . This gives us the following:

$$f(x; C, \lambda) = \begin{cases} \frac{1}{2\lambda}(1 + e^C)e^{-x/\lambda} & C\lambda \leq x \\ \frac{e^{-x/\lambda} - e^{x/\lambda}}{2\lambda(1 - e^C)} & C\lambda > x \\ 0 & x < 0 \end{cases}$$

Equation S7.1: The branch length distribution.

Notably, this is non-differentiable at  $C\lambda$ , where it achieves its maximum, and reduces to an exponential distribution when  $C = 0$ , corresponding to the lineages being sampled from a single population. For any given gene tree triplet topology, the internal branch length distribution will be a mixture of distributions of this type (Fig. S62). There will always be some ILS component that has  $C = 0$ , with a possible additional distribution with  $C$  corresponding to the amount of time during which the two sister gene lineages are isolated. In reality, the mixture proportions between these distributions will be determined by the effective population sizes and lengths of each branch in the species tree. However, our implementation of expectation maximization to infer these parameters treats them as independent for computational simplicity, as it allows us to estimate the mixture proportions and parameters of each distribution iteratively (explained in greater detail in section 7.5.1). We find that our method still performs well despite this relaxation (see sections 7.5.4 and 7.5.5).

## 7.5 Inference

Since we need to estimate both the assignment of each locus to a distribution as well as the parameters of the distributions themselves, we use an iterative inference algorithm called expectation maximization (EM), which we describe using notation from definitions S7.2. Given  $K$  distributions to fit, EM works by alternating between two problems. First is the E-step, where we calculate the relative probability that a given branch length could be sampled from either of the distributions given values for the parameters  $\{C_k\lambda\}$ ,  $\lambda$ , and  $\{\pi_k\}$  (the peak locations, scaling, and mixing proportions respectively). Next is the M-step, where we fix the probabilities calculated in the E-step and search for the values of  $\{C_k\}$ ,  $\lambda$ , and  $\{\pi_k\}$  that maximize the log-likelihood.

---

|                                      |                                                                                                                                                 |
|--------------------------------------|-------------------------------------------------------------------------------------------------------------------------------------------------|
| $X$                                  | The data, in the form of internal branch lengths in units of substitutions per site, represented as a vector with length $n$ .                  |
| $x_i$                                | The $i^{th}$ branch length in $X$ .                                                                                                             |
| $K$                                  | The total number of contributing distributions in the observed triplet branch length mixture distribution, either 1 or 2 in our implementation. |
| $\lambda$                            | Scaling factor for converting the distributions in coalescent units to the observed branch lengths ( $2N_e\mu$ ).                               |
| $C_k$                                | Interval parameter $C$ of the $k^{th}$ distribution.                                                                                            |
| $\pi_k$                              | Mixing proportion of the $k^{th}$ distribution.                                                                                                 |
| $q_{C\lambda}(x_i)$                  | $\pi_i f(x; C, \lambda) / \sum_k^K \pi_k f(x; C, \lambda)$ , the soft assignment of the value $x_i$ to either of the two $K$ in $\{0, 1\}$ .    |
| $\log(L(\{x_i\}, \{C_k\}, \lambda))$ | The log-likelihood, $\log \prod_{x_i \in X} \sum_{C_k} \pi_k f(x_i; C, \lambda)$ .                                                              |

---

Definitions S7.2

As we need a fixed  $K$ , we will define two competing models for each gene tree triplet topology, one with initial parameters  $K = 1, C_1 = 0$  (a pure ILS model) and another with  $K = 2, C_1 = 0, C_2 = 1$  (a model with a non-ILS component, whether due to speciation and/or introgression).

## 7.5.1 Expectation Maximization

We use EM to infer the parameters of the mixture models (see algorithm, Fig. S63). For the initial values, we take the mixture proportion of the  $k^{th}$  distribution,  $\pi_k$  to be  $1/K$ ,  $C_0 = 0$ , and  $C_1 = 1$ . Given  $\{C_k\}$ , the optimal assignments of data to the  $k^{th}$  distribution is the ratio  $\pi_k f(x; C, \lambda) / \sum_k^K \pi_k f(x; C, \lambda)$ , which we denote  $q_{C_k \lambda}(x_i)$ . We update this value in the E-step and split the M-step into two parts, updating first the the peak of the  $k^{th}$  distribution ( $C_k \lambda$ ) followed by the scalar  $\lambda$  conditioned on  $C_k \lambda$ . This repeats until the change in log-likelihood is below an input precision threshold, or a user-specified number of iterations have passed.

### 7.5.1.1 Picking $C\lambda$

In the M-step we want to maximize the log-likelihood by solving the following for each  $k$ :

$$C_k \lambda = \operatorname{argmax}_{C, \lambda} \sum_{i=1}^n q_{C_k}(x_i) \ln(f(x; C, \lambda))$$

However, since  $f$  is not differentiable at  $C\lambda$  we need to consider points on either side of each  $C\lambda$  separately. We rewrite  $\sum_{i=1}^n q_{C_k}(x_i) \log(f(x; C, \lambda))$  in terms of the data above and below  $C\lambda$ :

$$\begin{aligned} E[\log(L)] &= \sum_{x_i < C\lambda} q_C(x_i) \log\left(\frac{-e^{\frac{x_i}{\lambda}} + e^{\frac{x_i}{\lambda}}}{2\lambda(-1 + e^C)}\right) + \sum_{x_i \geq C\lambda} q_C(x_i) \left(-\log(2) + \log\left(\frac{e^{-\frac{x_i}{\lambda}}(1 + e^C)}{2\lambda}\right)\right) \\ &= \sum_{x_i < C\lambda} q_C(x_i) (\log(\sinh(x_i/\lambda))) - \sum_{x_i > C\lambda} q_C \log(e^{-\frac{x_i}{\lambda}/2\lambda}) + \sum_{x_i > C\lambda} q_C (-\log(2)) \\ &\quad + \sum_{x_i > C\lambda} q_C(x_i) (\log(1 + e^C)) - \sum_{x_i < C\lambda} q_C(x_i) (\log(e^C - 1)) \end{aligned}$$

Equation S7.2: The expectation of the log-likelihood.

Conditioned on a particular value of  $\lambda$ , only the two terms on the last line differ between values of  $C\lambda$  equal to sequential elements of the data. Furthermore, they are both convex, and consequently the whole sum is convex for values of  $C\lambda$  between adjacent values in  $X$ . As a result, the expected likelihood is maximized by  $C\lambda$  taking on a value realized by the branch lengths in the data. We need only search these finite possible values for our optimal  $C\lambda$  and return it.

### 7.5.1.2 Finding the conditional $\lambda$ using gradient ascent

To find  $\lambda$  given  $C_k \lambda$ , we calculate the  $\lambda$ -derivative of  $\log(L)$  at the given value for  $\lambda$  and change  $\lambda$  by an amount proportional to this quantity. In the space of mixture models we are considering, we only need this derivative for  $k = 2$ , as when  $k = 1, C_1 = 0$  we only have an exponential and the maximum likelihood estimate of  $\lambda$  is  $\bar{x}_i$ . For the former case, we still take  $C_1 = 0$  as the exponential ILS component. This gives us the following for  $k = 2$ :

$$\begin{aligned}
\log(L) &= \log \prod_{x_i \in X} \sum_{C_k} \pi_k * f(x_i; C_k, \lambda) \\
\frac{\partial \log(L)}{\partial \lambda} &= \partial \lambda \sum_{x_i \in X} \log \sum_{C_k} \pi_k * f(x_i; C_k, \lambda) \\
&= \sum_{x_i \in X} \partial \lambda \log(\pi_1 * f(x_i; C_1, \lambda) + \pi_2 * f(x_i; C_2, \lambda)) \\
&= \begin{cases} \frac{-C_2 \lambda - \lambda + \frac{C_2 \lambda (2 - \pi_2)}{\pi_2 e^{C_2 \lambda} + 2 - \pi_2} + x}{\lambda^2} & C_2 \lambda \leq x \\ \frac{\frac{C_2 \lambda}{e^{C_2 \lambda} - 1} - \lambda - \frac{C_2 \lambda (2 - \pi_2) + \pi_2 (2x - C_2 \lambda) e^{\frac{2x}{\lambda}}}{2(1 - \pi_2)(e^{C_2 \lambda} - 1) + \pi_2 \left( e^{\frac{2x}{\lambda}} - 1 \right)} + x}{\lambda^2} & C_2 \lambda > x \end{cases}
\end{aligned}$$

Equation S7.3: The derivative of the log likelihood with respect to  $\lambda$ .

We note that this can be extended to  $K > 2$ , but we do not observe distributions with more than two modes in our dataset. For completeness, we include the  $k = 3$  case below. We use the following symbols for simplicity:  $C_2 \lambda = \beta$ ,  $C_3 \lambda = \gamma$ ,  $\pi_2 = p$ , and  $\pi_3 = q$ .

$$\left\{ \begin{array}{l} \frac{x \cosh\left(\frac{x}{\lambda}\right) \left( -\frac{p}{e^{\beta/\lambda} - 1} - \frac{q}{e^{\gamma/\lambda} - 1} \right) + \sinh\left(\frac{x}{\lambda}\right) \left( \frac{p(e^{\beta/\lambda}(\beta - \lambda) + \lambda)}{(e^{\beta/\lambda} - 1)^2} - \frac{\lambda q}{e^{\gamma/\lambda} - 1} + \frac{1}{4} \gamma q \operatorname{csch}^2\left(\frac{\gamma}{2\lambda}\right) \right) + (p+q-1) \left( -e^{-\frac{x}{\lambda}} \right) (x - \lambda)}{\lambda^2 \left( \sinh\left(\frac{x}{\lambda}\right) \left( \frac{p}{e^{\beta/\lambda} - 1} + \frac{q}{e^{\gamma/\lambda} - 1} \right) - (p+q-1) e^{-\frac{x}{\lambda}} \right)} \quad x_i < \beta, \gamma \\ \frac{\frac{px(e^{\beta/\lambda} + 1)e^{-\frac{x}{\lambda}}}{2\lambda^3} - \frac{\beta p e^{\frac{\beta}{\lambda} - \frac{x}{\lambda}}}{2\lambda^3} - \frac{p(e^{\beta/\lambda} + 1)e^{-\frac{x}{\lambda}}}{2\lambda^2} + \frac{x(-p-q+1)e^{-\frac{x}{\lambda}}}{\lambda^3} - \frac{(-p-q+1)e^{-\frac{x}{\lambda}}}{\lambda^2} + \frac{\gamma q e^{\gamma/\lambda} \sinh\left(\frac{x}{\lambda}\right)}{\lambda^3 (e^{\gamma/\lambda} - 1)^2} - \frac{qx \cosh\left(\frac{x}{\lambda}\right)}{\lambda^3 (e^{\gamma/\lambda} - 1)} - \frac{q \sinh\left(\frac{x}{\lambda}\right)}{\lambda^2 (e^{\gamma/\lambda} - 1)}}{\frac{p(e^{\beta/\lambda} + 1)e^{-\frac{x}{\lambda}}}{2\lambda} + \frac{(-p-q+1)e^{-\frac{x}{\lambda}}}{\lambda} + \frac{q \sinh\left(\frac{x}{\lambda}\right)}{\lambda (e^{\gamma/\lambda} - 1)}} \quad \beta \leq x_i < \gamma \\ -\frac{\gamma + \lambda + \frac{p(\beta - \gamma)e^{\beta/\lambda} + \gamma(p+q-2)}{p(e^{\beta/\lambda} - 1) + q(e^{\gamma/\lambda} - 1)} + 2}{\lambda^2} - x \quad \beta, \gamma \leq x_i \end{array} \right.$$

Equation S7.4: The derivative evaluated for the general three distribution mixture case.

We then add a value proportional to the derivative by a factor  $s$  to the current value of  $\lambda$  and check the likelihood. If it increases, we keep the new value and repeat until convergence. If at any point the proposed step decreases the likelihood, we decrease  $s$  by half and retry until we find the appropriate step size.

We note that given external knowledge about the value of  $\lambda = \theta/2$ , we recommend inputting this value directly, which our implementation supports. This both speeds up the procedure and increases power for inferring  $C$  and  $\pi$ .

## 7.5.2 Discrete case

If there is sufficient recombination or insufficient mutation such that the average locus contains  $O(1)$  SNPs, treating the branch lengths as continuous may be misleading. Instead, one could use the discrete distribution of the counts of mutations on branches in the same way as the branch lengths, which we have included for completeness. We derive the probability mass function by treating mutations as a Poisson process with parameter a random variable distributed as the true coalescent branch length. Given our branch length distribution  $f(l; C, \lambda)$ , and taking  $\Gamma(a, b)$  as the upper incomplete gamma function, we can write this as the following:

$$\begin{aligned}
P(X = n) &= E[P(X = n|l)] = \int_0^\infty \left( e^{-\theta l/2} \frac{(\theta l/2)^n}{n!} \right) f(l; C, \lambda) dl \\
P(X = n) &= \theta^n \left( ((\theta^2 - 4)^{-2n-1} ((\theta^2 - 4)^n ((\theta - 2)^{n+1} (\Gamma(n+1, \frac{1}{2}C(\theta+2)) - n\Gamma(n)) \right. \\
&\quad + (\theta+2)^{n+1}\Gamma(n+1)) - (\theta+2)((\theta-2)(\theta+2)^2)^n \Gamma(n+1, \frac{1}{2}C(\theta-2))) / ((e^C - 1)n!) \\
&\quad \left. + \frac{(e^C + 1)(\theta+2)^{-n-1}\Gamma(n+1, \frac{1}{2}C(\theta+2))}{\Gamma(n+1)} \right)
\end{aligned}$$

Equation S7.5: The PMF for the SNP counts on internal branches.

Notice that we have reparameterized from  $\lambda$  to  $\theta$ , the population mutation rate. For computational efficiency, we'll still use the inferred branch lengths as the search space for  $C$ . As a result, the algorithm remains unchanged, except that our likelihood is now composed of the above probability mass function. We include this for completeness, but do not use this formulation in our analysis, as it is significantly slower and our windows have many more than  $O(1)$  SNPs on average.

### 7.5.3 Model selection

EM requires that we input a specified value for  $K$ , the number of distributions. As a result, we can test each triplet for  $K$  equal to 2 (an introgression model) and  $K=1$  (an ILS-only model) as described in the opening of section 7.5. The introgression proportion estimates from the  $K = 2$  test can be taken directly, or a filter can be applied to take only introgression events which significantly improve the likelihood fit of our model over an ILS-only model. To discriminate between these, we use the Bayesian Information Criterion test (BIC) in order to penalize models based on their number of parameters. We calculate the BIC value of the model using the following equation, where  $N$  is the number of datapoints in a topology, and  $\hat{L}$  is the likelihood of the model with parameters we estimate via EM:

$$BIC = \log(N) * (2 * K - 1) - 2\log(\hat{L})$$

Equation S7.6: The Bayesian Information Criterion test.

The first term is meant to capture the number of parameters in a given model, with each distribution indexed by  $k$  having a value for  $C_k$  and a mixture proportion  $p_k$ , the latter of which must sum to 1. The model with the lower BIC value is then preferred, with a significance threshold for  $\Delta BIC$  of  $> 10$ , which was selected prior to analysis per the standard set by Kass and Raftery. If the  $K = 2$  introgression model is not significantly supported, we say that the introgression proportion fit to the data does not significantly improve the fit over an ILS-only model. We report these inferred introgression values in addition to the raw values as an additional, conservative, estimator.

### 7.5.4 Coalescent simulation tests

To verify the behavior of the procedure given knowledge of the true gene genealogies, we simulated coalescent trees using msprime (63) and observed the error in the parameter estimates (Fig. S64). Trees were generated with a fixed  $\lambda$  such that the reported branch lengths are in units of  $2N$  generations, with  $N$  fixed at  $10^6$  to approximate *Heliconius* (84). We performed ten replicates of 650 trees for each combination of the parameter values for  $\pi_1$  and  $C$  detailed in Table S12.

As we see only error in the form of false negatives (Fig. S64 B), and only at low mixing proportions (Fig. S64 C), these plots combined demonstrate that the error arises almost entirely as a result of the

non-exponential introgression distribution being mixed in at low frequencies ( $< 60$  trees). In addition, we find in larger tests that this threshold is a result of the number of points rather than the proportion itself.

We find that the additional noise generated by only observing the sequence data on non-recombining blocks rather than the true coalescent branch lengths does not strongly change our inference. For this test, we first generated the genealogies for 1000 loci of length 1kb using msprime, under a three species model with demographic parameters detailed in Fig. S65. Then, we performed 100 replicates of the conversion of these trees to sequences using Seq-Gen (64) with a GTR mutation model with  $\mu = 3 * 10^{-9}$ , and lastly used PhyML (65) to infer trees for the generated loci. For these tests we used  $N_e = 10^6$  to match our expectations for *Heliconius*, and generated the underlying gene genealogies when  $C = 3N_e$  and the observable proportion of introgressed loci that do not experience ILS was 0.783, as we want to diagnose error due to sequence simulation and not ambiguity in the coalescent trees (the whole process of generating the 1000 true coalescent histories, then converting them to sequence data and model fitting 100 independent times apiece was replicated a total of 5 times, with one representative replicate shown in Fig. S66).

From these, the effect of sequence noise appears to be conservative as well, inflating the reported  $C$  value slightly (Fig. S66 A), which naturally decreases the estimated introgression probability (Fig. S66 B). This result is in line with the simulations conducted in section 7.5.5, and may reflect a slight conservative bias endowed by the depletion of zero-length branches due to our tree inference step.

### 7.5.5 Effects of demography

So far, we have assumed that population sizes are constant throughout the tree. To see if this assumption is fundamentally limiting, We tested whether our method is stable in inferring the observable introgression fraction, or the set of loci which migrate backwards in time but then do not go on to experience ILS. This quantity can be obtained from the backwards-in-time migration rate by multiplying the migration rate by the coalescence probability in the branch during the interval  $C$  (85). We simulated a number of alternate demographic histories, generated sequence data, inferred trees, and estimated introgression fraction as we would with real data. In general, we find our method is robust to such tests, and is consistently conservative, as detailed below.

Our demographic tests were modeled on those of Martin *et al*, 2016 (84). The null demography used is presented in Fig. S65. We identify three relevant branches: the source of introgression, the recipient of introgression, and the common ancestor. We then chose one of these branches to alter in each test. For the source and recipient populations, we allowed the size to either double or halve at the time in which they split into their own lineage. For the ancestor, the size either doubles or halves partway up the branch, 8E6 generations from the present. We report the results for base population sizes of 250,000, 500,000, 1 million, and 2 million based on (84) (Fig. S67). Each simulation was run in msprime, with the sequences generated using Seq-Gen under the default GTR model, and trees inferred using PhyML. For completeness, we also report the expected introgression fraction as either simulated migration rate or observable introgression fraction (Fig. S68, S69) (again, this latter value is the probability that an allele is introgressed and does not experience ILS).

### 7.5.6 Effects of data filtering

In addition to these simulations, we tested the output when different filterings of the input data were used. In order to test the effect of recombination within our 5 kb blocks, we removed any windows that had significant support for an internal recombination breakpoint as measured by the phi test (77). Here, we find support for introgression in 68% of discordant topologies. We also used a highly filtered set, where we removed any windows with  $< 80\%$  mean bootstrap support,  $< 50$  phylogenetically informative sites, and  $> 25\%$  missing data. Here, we recover overall more topologies concordant with the species tree (76% instead of 71%), but those with discordant topologies have a much higher probability of introgression: 94%. A similar result was found when we used the more distant *Eueides tales* as our outgroup, where we recovered 90.3% introgression amongst discordant topologies. These latter two filters select for conserved regions. Because gene trees inferred from loci experiencing ILS will have short internal branches, they may receive low bootstrap support. Filtering such loci out could therefore mask the exponential component of

our branch length distributions, biasing QuIBL’s inference towards a higher introgression proportion. We therefore choose the more conservative approach of minimal filtering.

## 7.5.7 Output interpretation

Full results for the *erato-sara* clade of *Heliconius* can be found in Table S13. For each triplet topology in our two distribution model,  $C_2$  corresponds to an estimate of the time in units of  $2N_e$  generations that the two sister lineages were isolated from the third species.  $\pi_2$  is an estimate of what fraction of the gene trees in the input that were not generated via ILS.  $\lambda$  corresponds to the single best estimate of  $\theta/2$  for the branch in the species tree where the two sister lineages coalesced, averaging over both the ILS and non-ILS gene trees. One difficulty in interpreting model support for introgression is that hidden recombination events can bias the branch length estimates to be longer than the true coalescent history, increasing our inferred introgression probability. However, we mitigated this by selecting small windows which are less likely to contain a recombination breakpoint, and checked for the ILS modes this would generate as detailed above.

We show an example of the output from the method in Fig. S70. Distributions inferred using unlinked loci were used to calculate ILS and non-ILS probabilities for all windows in the genome. The triplet considered here is *H. erato* + *H. hecalesia* + *H. telesiphe*, and it was chosen because it illuminates the major introgression event between *H. hecalesia* and *H. telesiphe* discussed in the main text. According to the species tree, both previously published and inferred here, *H. telesiphe* should be the outgroup. The topology where *H. erato* is the outgroup is consistent with introgression between *H. telesiphe* and *H. hecalesia*, though it could also represent ILS. We do not infer large scale introgression between *H. telesiphe* and *H. erato* (Table S13), so we expect that many of the topologies with *H. hecalesia* as the outgroup correspond to ILS. The raw internal branch lengths are shown in Fig. S70 A-B, and it is clear that the topology corresponding to ILS has a significantly shorter internal branch than either of the other two topologies. This difference is borne out in the non-ILS proportion (Fig. S70 C), which reaches a relatively small maximum value of  $\pi_2$  as compared to the other two topologies and plateaus, as shown in Fig. S70 D.

### 7.5.7.1 Output summary and $f_d$ comparison

We compare this output to that of  $f_d$  using the same window alignments. We find that when examining the introgression topology (*H. erato* as outgroup), internal branch length is strongly, positively correlated with  $f_d$  (Fig. S71 A). When considering the inferred non-ILS probability, this correlation still exists, but the non-ILS probability is significantly higher than  $f_d$ , and has much of its mass at the maximum value (Fig. S71 B). The difference in absolute value is due to the fact that  $f_d$  loses power as time since introgression increases (35). We were interested in testing whether the plateau of introgression probabilities was biologically meaningful, or whether we may be losing power by not discriminating amongst trees with branch lengths above the threshold  $C_2$ . As explained in the main text, we expect introgressed regions to be more common in regions of high recombination, and this expectation should hold when conditioning on the topology and testing for introgression probability. We therefore used only those windows that recovered the introgression topology, and compared the correlation between QuIBL introgression probability,  $f_d$ , or raw internal branch length with chromosome size and local recombination rate. In the chromosome size comparison, all metrics are significantly correlated, with QuIBL being strongest ( $p=3.7 \times 10^{-7}$ ,  $r^2=.758$ , Fig. S71C) followed by  $f_d$  ( $p=2 \times 10^{-4}$ ,  $r^2=.543$ , Fig. S71D) and raw internal branch length ( $p=5.9 \times 10^{-4}$ ,  $r^2=.490$ ). When comparing the introgression metrics to recombination rate, only QuIBL ( $p=3.7 \times 10^{-7}$ ,  $r^2=.758$ , Fig. S71E) and  $f_d$  ( $p=2 \times 10^{-4}$ ,  $r^2=.543$ , Fig. S71F) show a significant correlation, and not raw internal branch length ( $p=0.8$ ,  $r^2=2.8 \times 10^{-6}$ ) These results are consistent with a biologically meaningful interpretation of the plateau in introgression probability.

Given the results of the independent triplet analyses, we can synthesize them by looking at the output for all tree topologies in all triplets. Fig. S72 A shows the distribution of  $C_2$  values inferred from all triplets of the 13 *Heliconius* species in this study, while Fig. S72 B displays the corresponding  $\pi_2$  non-ILS proportions. Among topologies with a considerable number of representative trees, non-ILS proportion increases with increase branch length,  $C_2$ , as expected (Fig. S72 C). Also as expected, topologies concordant with the species tree mostly show high values for  $\pi_2$ . There are some exceptions, most notably in triplets of the form (*H. demeter* or *H. sara*) + *H. telesiphe* + (*H. erato* or *H. himera*) (blue dots,  $\pi_2 \leq .5$ , Fig. S72 C-D).

Such triplets correspond to branch 7-8 in Fig. S19 and are briefly discussed in Section 8 below. The low  $\pi_2$  values are consistent with uncertainty as to the placement of *H. telesiphe* and with an extremely short internal branch leading from *H. telesiphe* to the ancestor of *H. sara* + *H. demeter*, such that most trees, even with the “species tree” topology arose via ILS. Those topologies with very few representative trees can often recover spurious values of  $C_2$  and  $\pi_2$ , but as a percentage of ancestry in the genome, they are not impactful (Fig. S72 D). Based on these values in Fig. S72 D, we define a metric to assess the whole-genome triplet-by-triplet support for introgression. Let  $\tau$  be the set of triplet topologies derived from the full taxon list, and  $\tau_D$  the subset of these which are inconsistent with the species tree. Then we can represent the total proportion of introgressed triplet tests among discordant trees as the following:

$$E_{intro} = \frac{\sum_{\tau_D} \pi_2 * n}{\sum_{\tau_D} n}$$

Equation S7.7: Our estimate of introgression, equal to the sum of the introgression proportions for all discordant triplet gene trees over the total number of discordant triplet gene trees.

Where  $\pi_2$  and  $n$  take values estimated for the triplet in  $\tau_D$  we are considering. In order to compute the total proportion of triplet gene trees derived through introgression, we simply change the denominator in Equation S7.7 to the total number of inferred trees, both discordant and concordant. We note that this value is averaged over all triplet gene trees, and as a result is closely related but not equal to the proportion of loci in the genome that have introgression anywhere in their history.

In order to facilitate a direct comparison with our  $\pi_2$  value for each topology, we calculated mean values for  $D$  and  $f_d$  for each of the 13 *Heliconius* species triplets, holding *E. tates* as the outgroup.  $\pi$  for a given “outgroup” in our method corresponds to the  $D$  or  $f_d$  statistic when that taxon is in the P1 position. This notation follows Patterson (11), where the topology is specified as (((P1,P2),P3),P4).  $f_d$  explicitly tests for introgression between P2 and P3. For example, consider the triplet *H. erato* + *H. hecalesia* + *H. telesiphe*, as above. When investigating possible introgression between *H. hecalesia* and *H. telesiphe*, those two species would be in the P2 and P3 position, respectively. In our method, we observe introgression between those two species when *H. erato* is the outgroup. Because the behavior of  $D$  and  $f_d$  with mis-specified trees is unclear, we only calculated comparisons in which the topologies were concordant with the species tree.

Results for these topologies are shown in Fig. S73. With respect to  $f_d$ , our non-ILS proportions are correlated but consistently higher for topologies with appreciable numbers of trees. We believe that this is due to the loss of power to detect introgression using  $f_d$  with increased time since the introgression event (35, additional discussion below).  $D$  is more strongly correlated with QuIBL’s estimates, but also tends to be lower than QuIBL. This is unexpected given the results from our simulations above and below, in which QuIBL is consistently conservative relative to  $D$ . One explanation for this is that there may have been introgression between both pairs of species: P1-P3 and P2-P3.  $D$  values represent the difference of discordant site patterns, and would therefore underreport introgression if it occurred between both pairs of species. In contrast, QuIBL treats each putative introgression event independently.

In  $D$  and related tests, only biallelic sites are considered, and each such site is assigned a pattern in which the ancestral allele is denoted  $A$ , derived allele  $B$ , and the order is P1, P2, P3, O in the topology structure detailed above. In the case of a single haplotype per population,  $f_d$  for a given window becomes

$$f_d = \frac{\sum C_{ABBA}(i) - C_{BABA}(i)}{\sum C_{ABBA}(i) + C_{AABA}(i) + C_{ABAA}(i)}$$

Equation S7.8:  $f_d$ , an introgression estimator from Martin *et al.*

Where  $C_{Pattern}(i)$  is the count of either 1 or 0, depending on whether or not the specified pattern is observed at site  $i$  in the window (modified from (35)). Here, it can be seen that the denominator includes sites private to P2 and P3. Therefore, as time since introgression increases, the number of  $AABA$  and  $ABAA$  sites increase as well, yielding lower estimates for  $f_d$ . The  $D$  statistic does not have this same property, and does show a correlation with our data, but it was designed for very closely related species and assumes that all  $ABBA$  or  $BABA$  sites arise due to either ILS or introgression (11). With additional



divergence time, this assumption is more likely to be violated due to convergent or multiple mutations at a single site, yielding more noise. To confirm this pattern, we simulated a number of different scenarios in which the backbone tree is held constant, but the time of introgression is varied. In Fig. S74 and S75, we use the same backbone tree as above, and vary window size, migration time, and population size. In every case, QuIBL non-ILS proportion remains constant, while  $f_a$  decreases with time since introgression.  $D$  appears to estimate the introgression fraction quite well with no recombination. In cases that include recombination (Fig. S76),  $D$  overestimates introgression,  $f_a$  consistently underestimates introgression, and QuIBL is robust until recombination greatly exceeds mutation rate. Even in this case, however, QuIBL is closer to the simulated migration rate than  $D$  or  $f_a$ .

## Section 8: Topology distribution

We calculated regional topologies in sliding windows across the genome in a number of different configurations. Interestingly, although we have a single multi-genome alignment, the fraction of windows that recovered each topology varied depending on whether the *H. erato demophoon* v1 or Hmel2.5 coordinates were used as reference. This may be due to weaker alignability between the *erato-sara* clade genomes and the Hmel2.5 assembly relative to *H. erato demophoon*, or may be due to the fact that the *H. erato demophoon* genome is approximately 100 Mb (33%) larger than the Hmel2.5 genome. The genome topology map using the Hmel2.5 coordinates is shown in Fig. S77A, and the most common topologies, their relative fractions, and block length distributions are shown in Fig. S77B,C. We also used 10 kb non-overlapping windows instead of 50 kb when mapping onto the *H. erato* genome. The chromosomal map constructed from these data are shown in Fig. S78, while basic alignment and phylogeny statistics including alignment length, number of phylogenetically informative sites, bootstrap support, missing data, and probability of recombination within a window are shown in Fig. S79 and Fig. S80. Those windows with at least 2 kb of aligned sites and mean bootstrap value  $\geq 80$  were used for all subsequent analyses of topology distributions. To ensure that variation in topology distribution along the genome was not driven by factors aside from recombination *per se*, we calculated the above general statistics for windows recovering each tree topology, as well as windows binned into recombination quintiles. We compared groups using the Kruskal-Wallis test, followed by the post-hoc Fisher's least significant difference (LSD) test with a Bonferroni correction, as implemented in the *agricolae* package (v1.3-0) in R (86). In all figures using this method, groups that are not significantly different from each other are labelled with the same letter. When applicable, we subset each category of data so that we compare equally-sized groups. We found no significant differences between the two major trees in any statistic aside from intra-window recombination (Fig. S81). Among recombination quintiles, there was a trend in which the higher recombination regions contained more phylogenetically informative sites. However, this trend did not carry over into tree confidence as measured by bootstrap support. As expected, the recombination quintiles as calculated by LDHelmet correlated with probability of recombination within each window (Fig. S82).

With these data, we aimed to elucidate structural genomic features associated with regional evolutionary histories, and therefore first characterized the ways in which those structural features vary and co-vary across the genome. Recombination rate is higher in regions of low gene density (Fig. S83, Fig. S84), and is lower at the edge of chromosomes (Fig. S85). However, gene density is constant across chromosomal position (Fig. S86). There is an unexpected, slightly positive relationship between chromosome size and gene density (Fig. S87), and a strongly negative relationship between chromosome size and average recombination rate (Fig. S88), though this correlation is weaker than in *H. melpomene* (8, 87), though the sample size for *H. erato* is much lower than that for *H. melpomene*.

As stated in the main text, the fraction of a given topology recovered in each chromosome was strongly correlated with that chromosome's total size in base pairs, and relationships for all 8 of the most common topologies are shown in Fig. S89, and their correlation coefficients are listed in Table S14. The Z chromosome was excluded when computing correlation coefficients, as the values recovered from it are clear outliers, almost certainly because the Z chromosome is often

involved in F1 hybrid female sterility, in accordance with Haldane's Rule (22, 23). Values from the chromosomes that contain inversions (chromosome 2 and chromosome 15) are also outliers, but as they form a minority of each chromosome, we included their chromosomes in this analysis; thus reported values are conservative estimates. Tree labels in Table S14 correspond to those in the main text Fig. 2B. All 8 most common topologies had significant associations with chromosome size ( $p < .05$ ), with correlation coefficients ( $r^2$ ) ranging from 0.197 to 0.883. We also examined the correlation between topology and binned position along the chromosome – Fig. S90 reflects the per-bin breakdown (all topologies within a bin sum to 1), while Fig. S91 reflects the per-tree breakdown (all measures of each tree type sum to 1). Regardless of how we split the data, we find an increase in "species tree" topology in the low-recombination regions at the edges of chromosomes. We then binned windows by their recombination rate as determined by linkage disequilibrium (14), and again saw a very strong negative correlation between species tree topology and recombination rate Fig. S92. Finally, we also predicted that topology would be associated with the density of coding sequence per window if incompatibility alleles were more likely to be in coding sequence. That relationship is much weaker, but we detect a minor decrease in species tree topologies in regions with very low coding sequence density (Fig. S93).

Interestingly, some triplets we examined show a reversal of the prevailing correlation with chromosome size. When examining the topology restricted to the triplet *H. demeter* – *H. telesiphe* – *H. erato*, windows with the "species tree topology", (*H. demeter*, (*H. telesiphe*, *H. erato*)) are slightly negatively correlated with chromosome size, while windows with the "introgression topology" (*H. erato*, (*H. demeter*, *H. telesiphe*)) show a slight positive correlation (Fig. S94). A small subset of our ASTRAL species trees also support this topology, but the relationships are weak.

## Section 9: Chromosome 2 Inversion

[return to top](#)

As mentioned in the main text, a large region on chromosome 2 displayed a topology discordant with the most common species relationships in the *H. erato* group. This region corresponds to a previously described inversion between *H. erato* and *H. melpomene*. We confirmed that this was in fact that inverted region by mapping all *erato* clade contigs onto Hmel2 (Fig. S74). We found clear evidence of an inversion in the *H. erato demophoon* reference genome, as well as the *H. hecalesia de novo* assembly. We also found contigs in *H. sara* and *H. demeter* that mapped across one of the inversion breakpoints, indicating that they are in the same orientation as *H. melpomene*. However, the breakpoints of this inversion are flanked by repetitive sequence that was difficult to align among all species, especially the left-hand breakpoint. Therefore, we infer the orientation of the inversion in *H. himera* and *H. telesiphe* based on the local topology (Fig. S95 A; Topology is Tree 3 in main text Fig. 2B). As was done for the chromosome 15 inversion in the main text, we used the branch length method in combination with  $D_{XY}$  to evaluate whether the discordant history seen in this region was due to ILS, inversion, or some other process. Again, we used the *H. sara*, *H. telesiphe*, *H. erato* triplet, and again we found that the internal branch length in the inversion was much larger than expected under simple ILS (Fig. S95 E). However, in contrast to the chromosome 15 inversion, normalized  $D_{XY}$  between *H. sara* and *H. telesiphe* was very close to the genome-wide average (Fig. S95 F). Normalized  $D_{XY}$  ( $T_3$ ) is calculated as  $D_{XY}$  between *H. telesiphe* and *H. sara* divided by the mean pairwise  $D_{XY}$  among all species in each region. This combination of statistics supports a history in which the inversion originated in the ancestor of the *erato-sara* clade and remained polymorphic for some time before speciation of the taxa we sampled.

In addition to ancestral polymorphism, the homologous region shows strong  $F_{ST}$  peaks between *H. erato* subspecies (14), so it is possible that this inversion remains polymorphic among some extant lineages. No ecological or other functional role has been implicated for this inversion, but such a large ancestrally polymorphic inversion that remains polymorphic to this day almost certainly indicates some sort of balancing selection.

Supplementary Figures

DAS\_09-93 - *Heliconius burneyi*

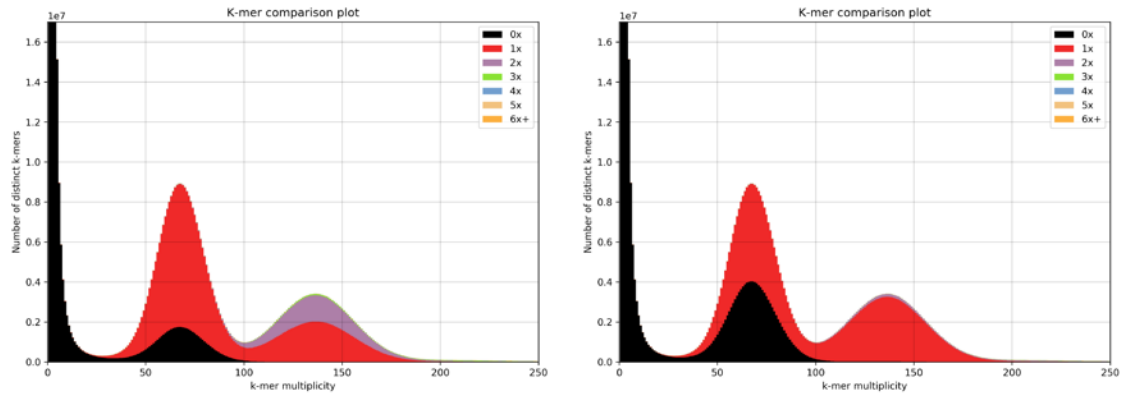

DAS\_09-132 - *Eueides tales*

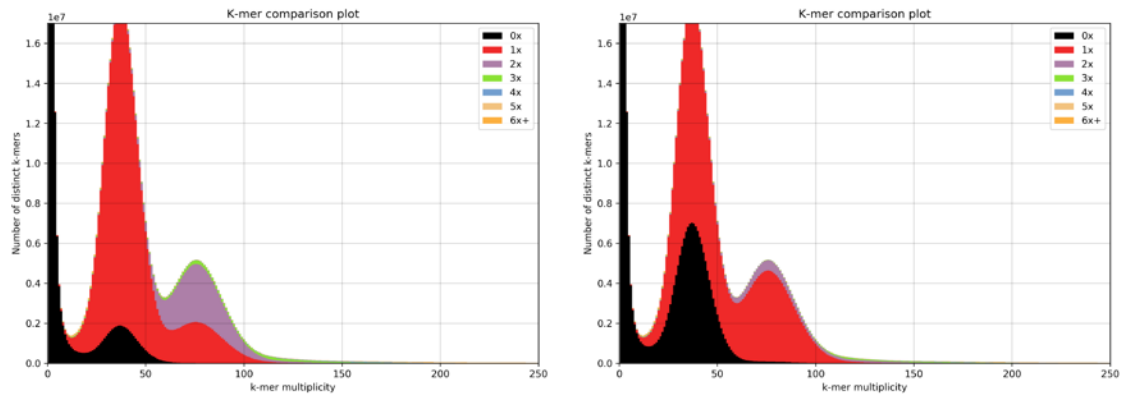

DAS\_09-229 - *Heliconius telesiphe* (contaminated)

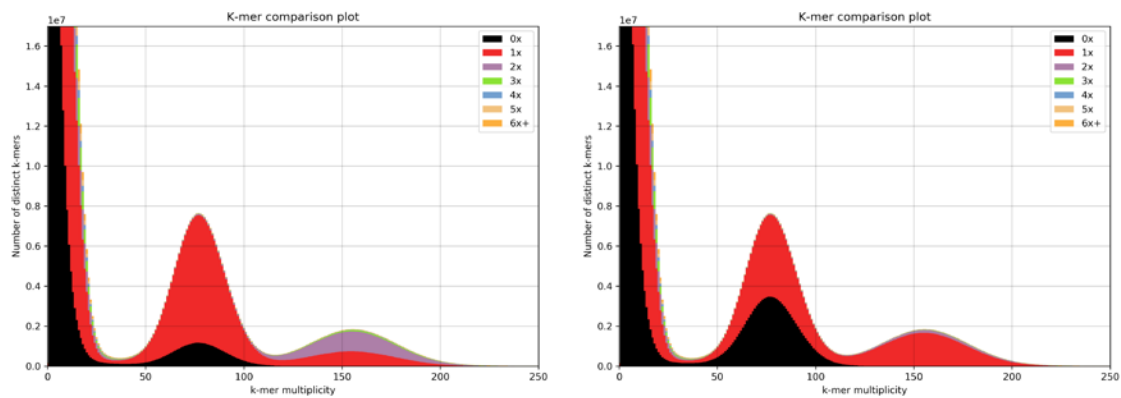

DAS\_11-919 - *Heliconius telesiphe*

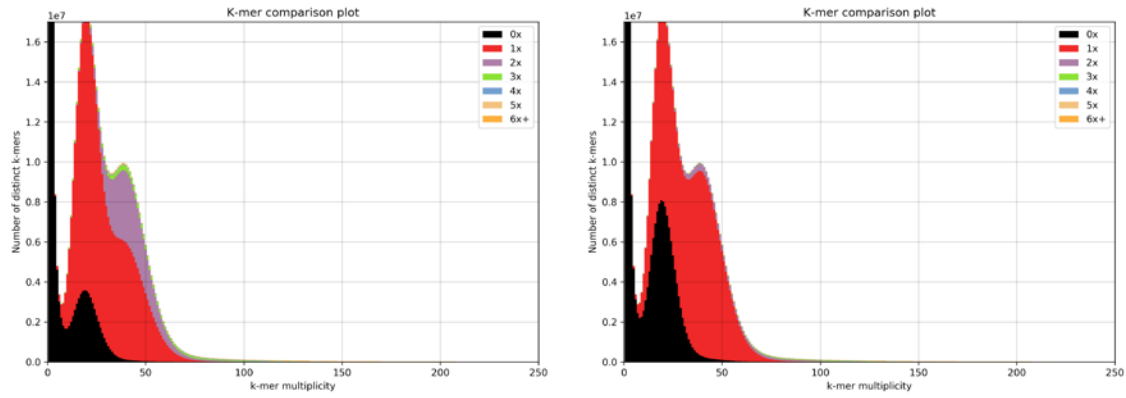

CAM-008802 - *Heliconius sara*

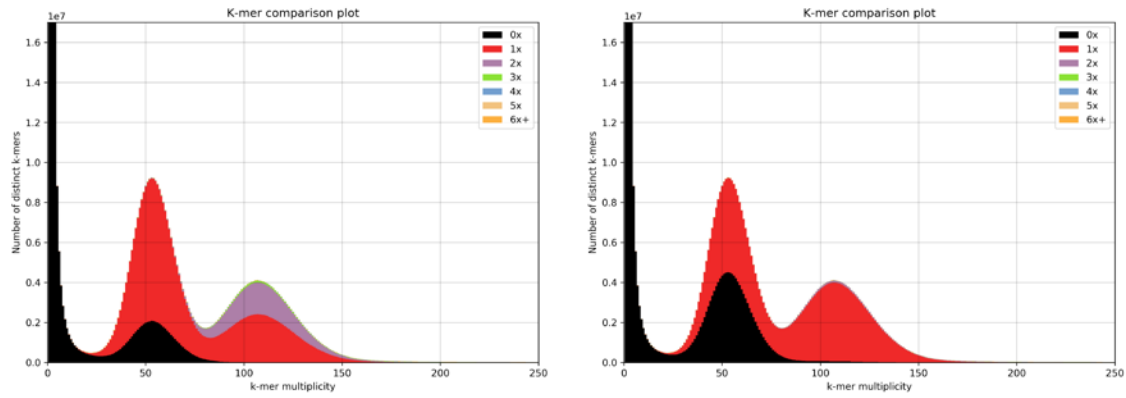

DAV\_3 - *Heliconius hecale* (replaced)

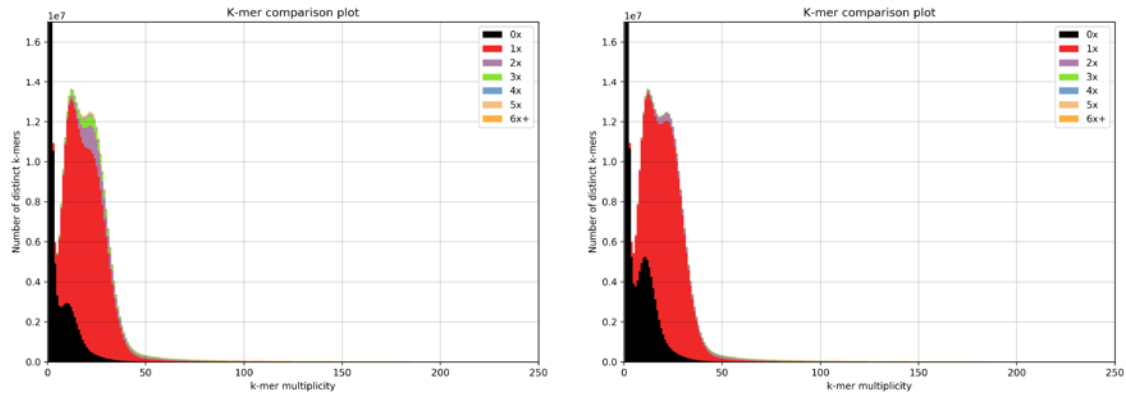

MCM\_6897 - *Heliconius doris*

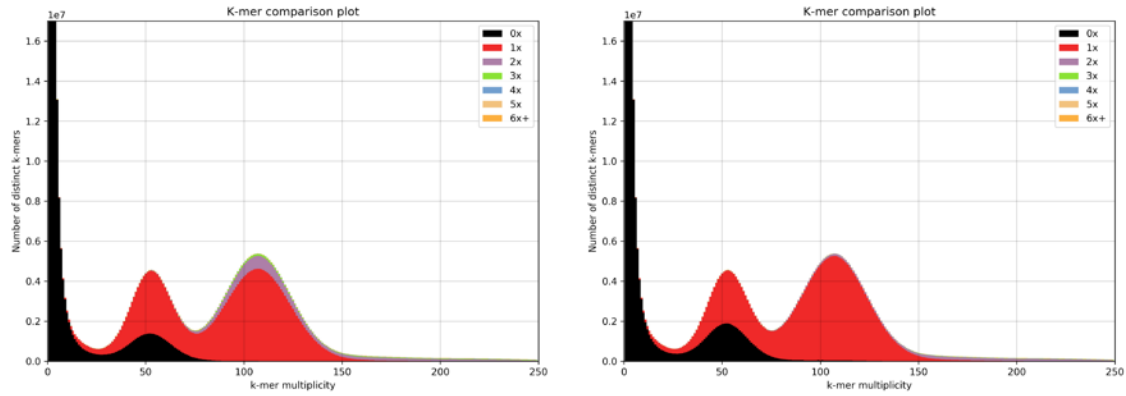

CAM-002492 - *Heliconius hecalesia*

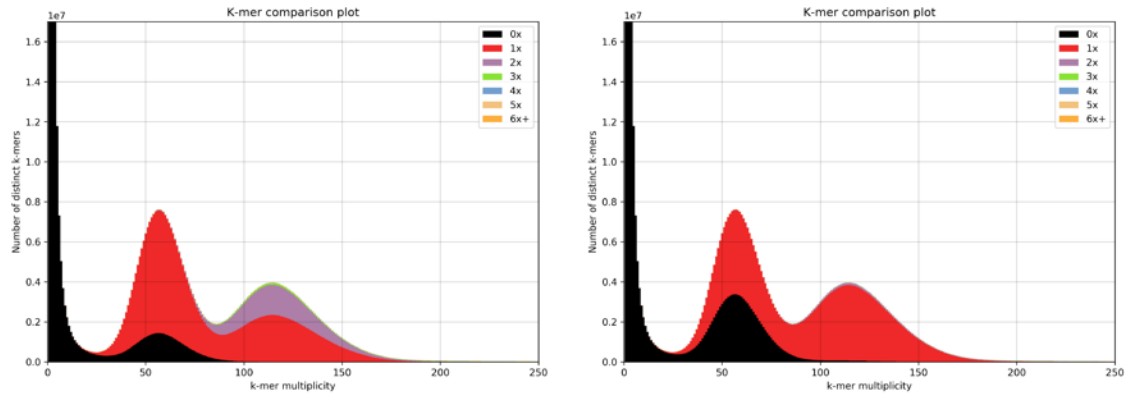

DAS\_11-759 *Dryas iulia*

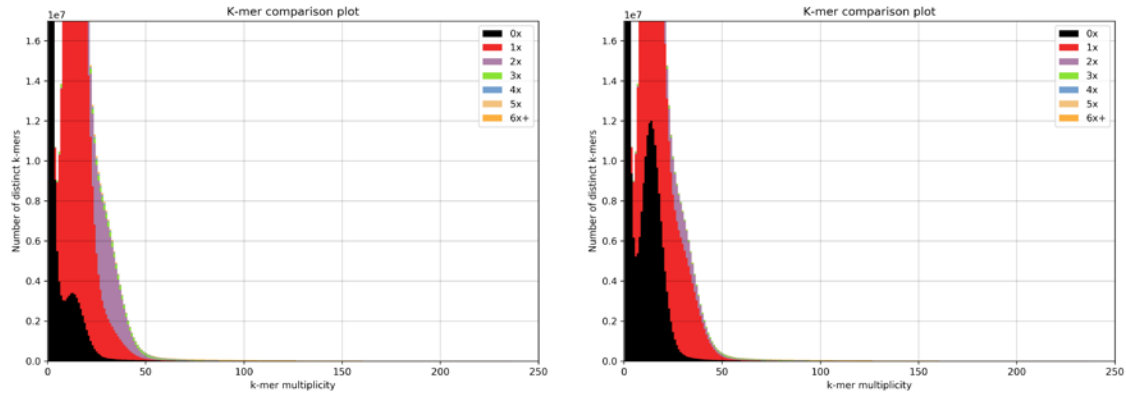

MCM\_6900 - *Heliconius himera*

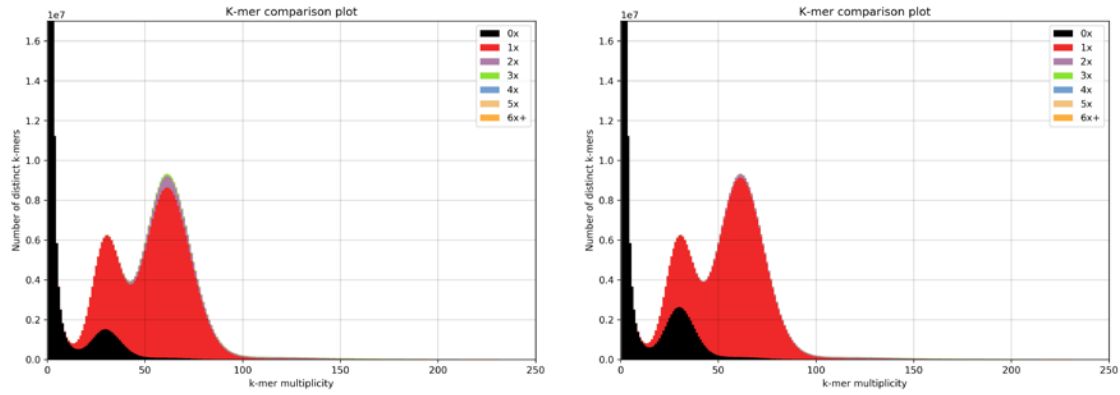

MCM\_7203 - *Heliconius hecale*

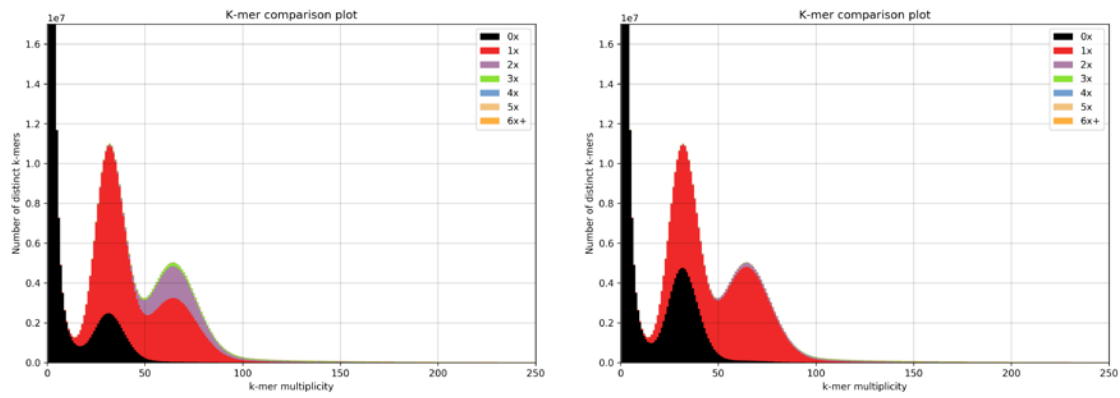

MCM\_6700 - *Heliconius erato x himera* F1

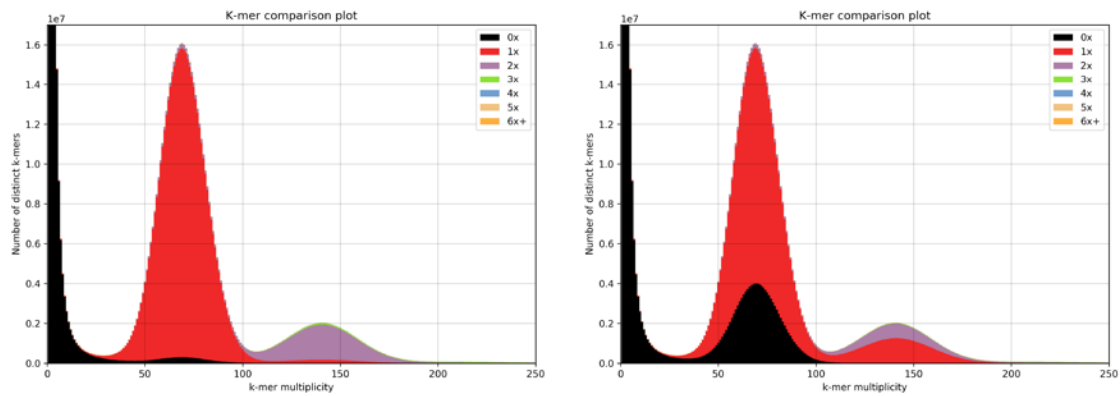



REE *Agraulis vanillae*

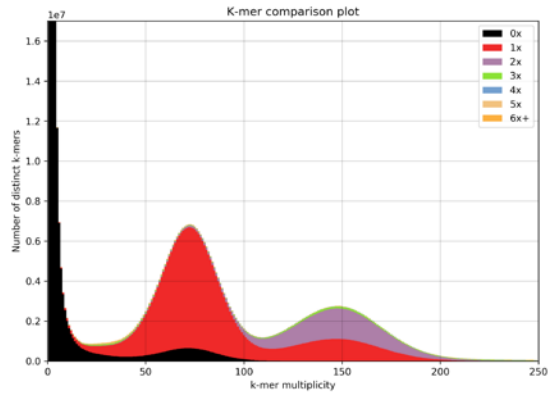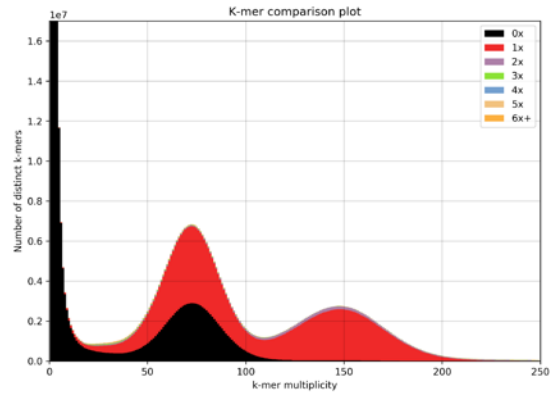

MCM\_6394 - *Heliconius erato* mother

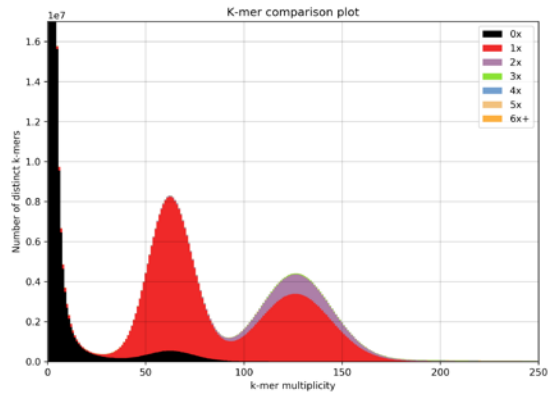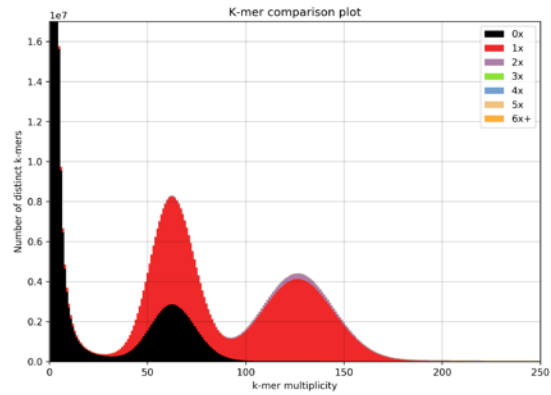

MCM\_6363 - *Heliconius himera* father

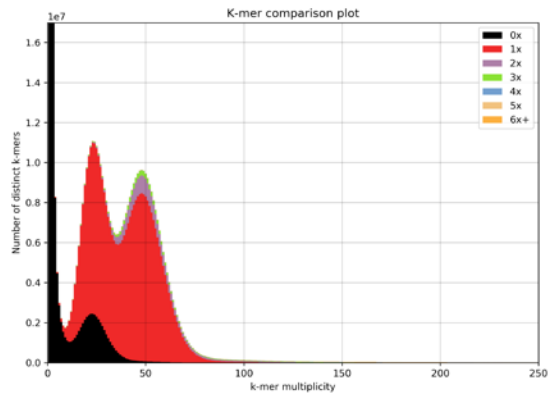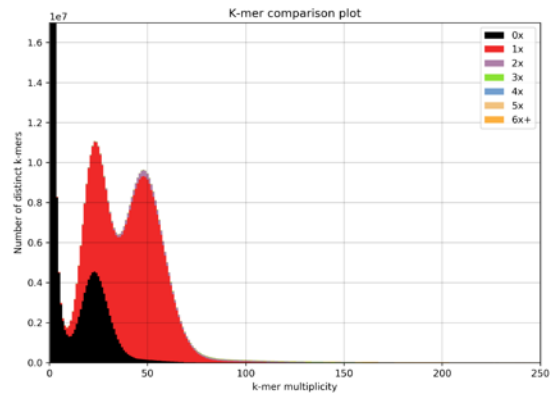

DAV\_2 - *Heliconius cydno*

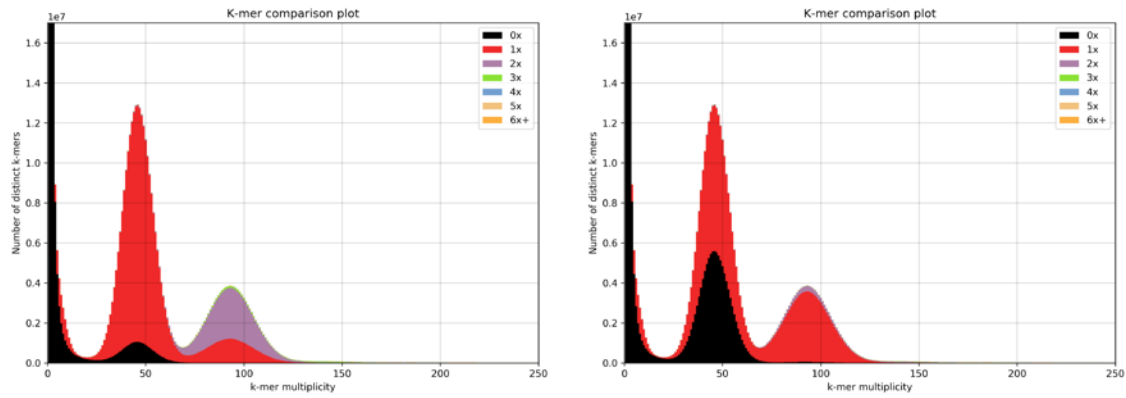

DAV\_4 - *Heliconius numata*

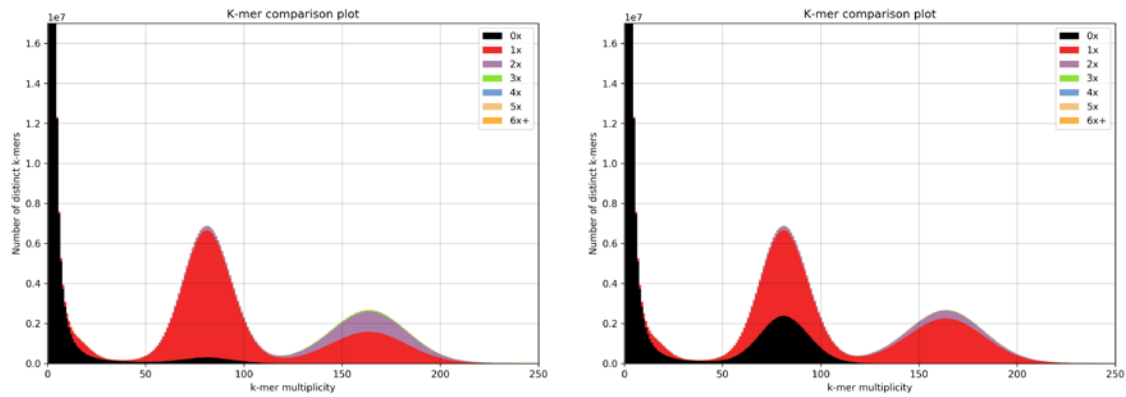

DAV\_5 - *Heliconius melpomene*

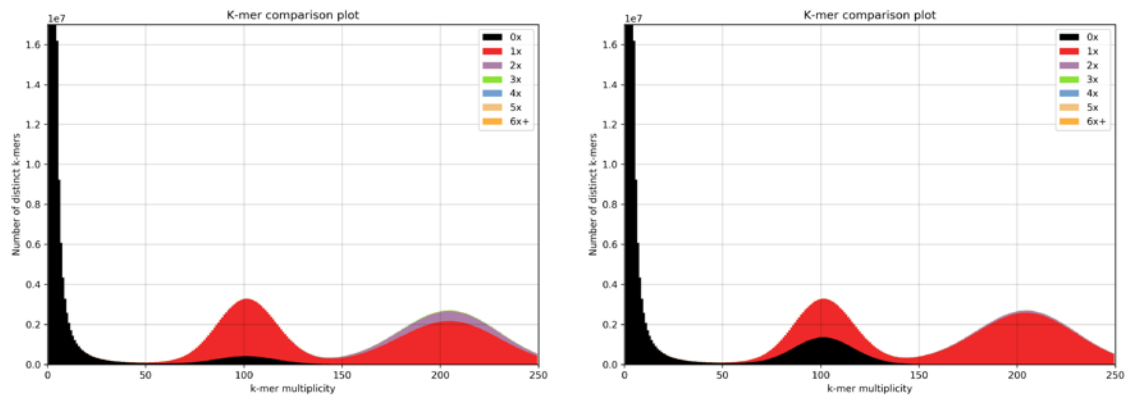

DAS\_GELE - *Heliconius elevatus*

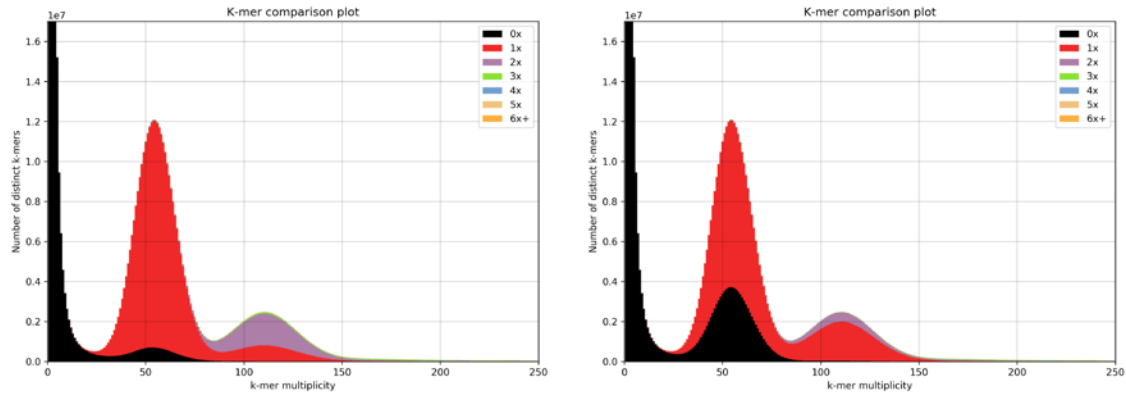

DAS\_REL13\_139 - *Heliconius pardalinus*

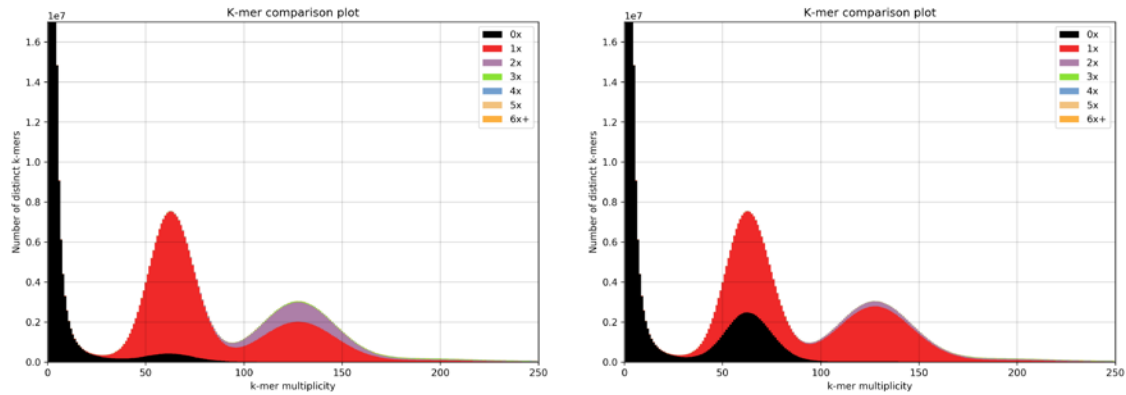

DAV\_1 - *Heliconius timareta*

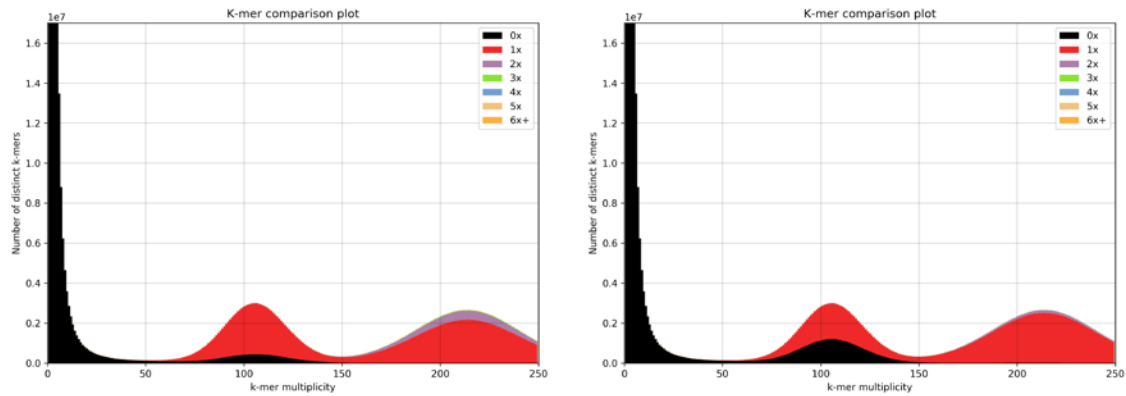

DAS\_09-282 - *Heliconius aoede* (contaminated)

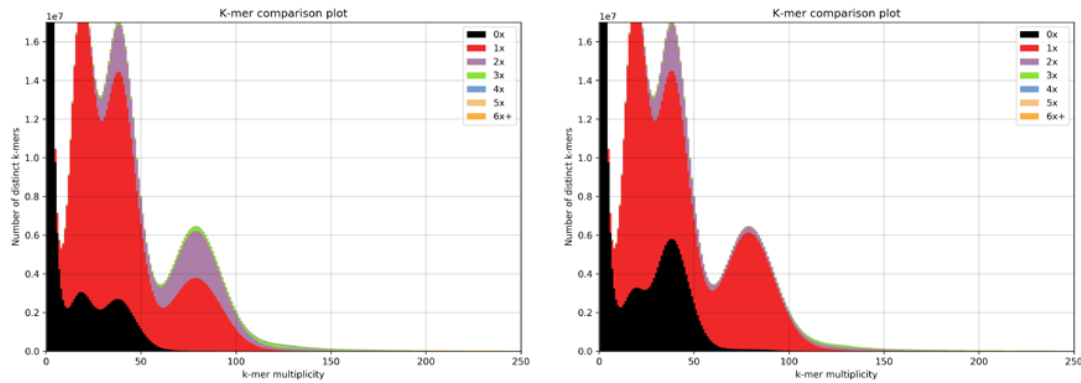

DAS\_09-323 - *Heliconius demeter*

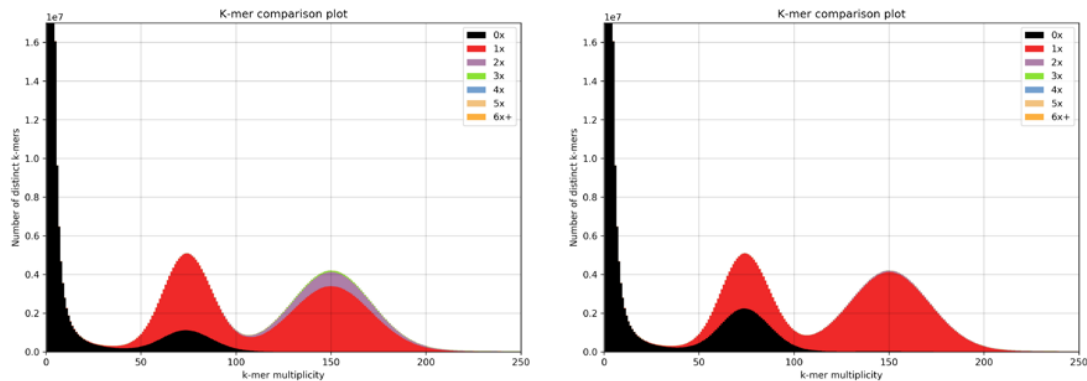

DAS\_110-111 - *Heliconius besckei*

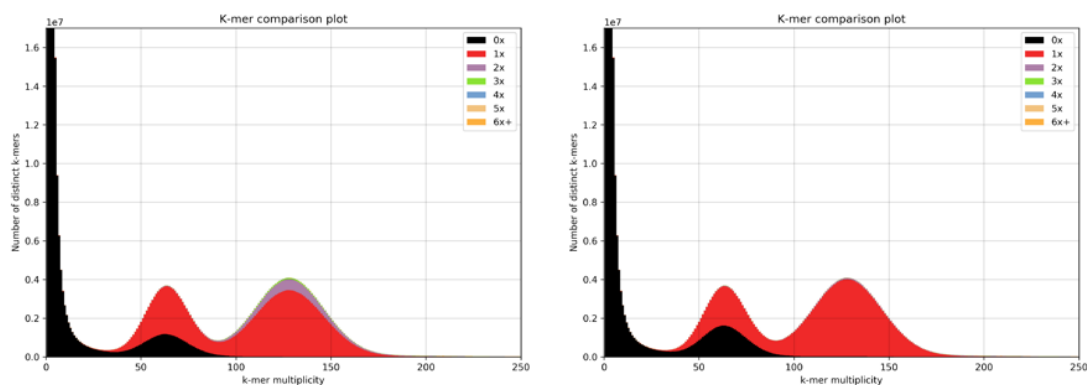

**Fig. S1 K-mer spectra for all *de novo* assemblies.**

The x-axis of each plot corresponds to the multiplicity of distinct k-mers in the raw reads. The first peak, near zero, corresponds to contaminants, the second peak corresponds to heterozygous content, and the third to homozygous content. The colors represent the number of times those k-mers are present in the genome assembly. Ideally, none of the contaminants would be assembled, half of the heterozygous content would be present as a single copy, and all of the homozygous content would be present as a single copy. For each species, the plot on the left shows the initial assembly, and the plot on the right shows the final assembly.

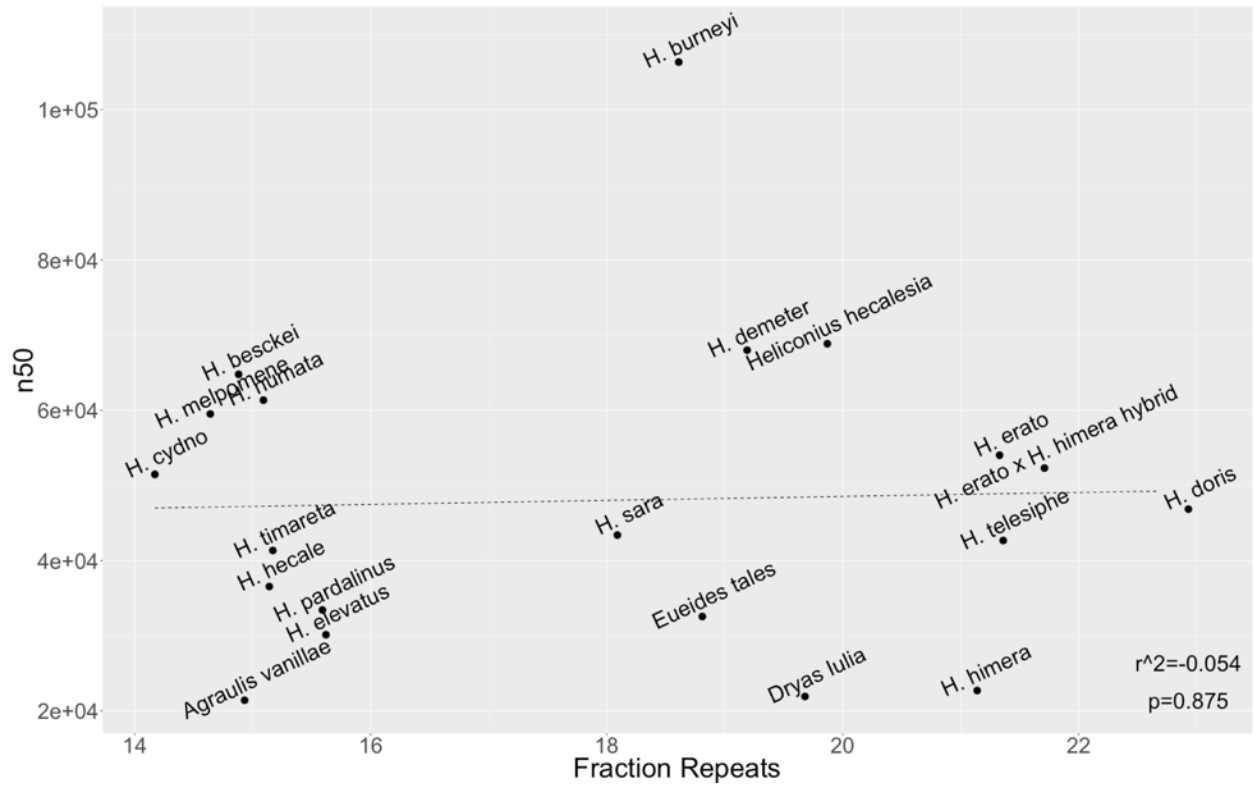

**Fig. S2 Relationship of N50 to repeat content**

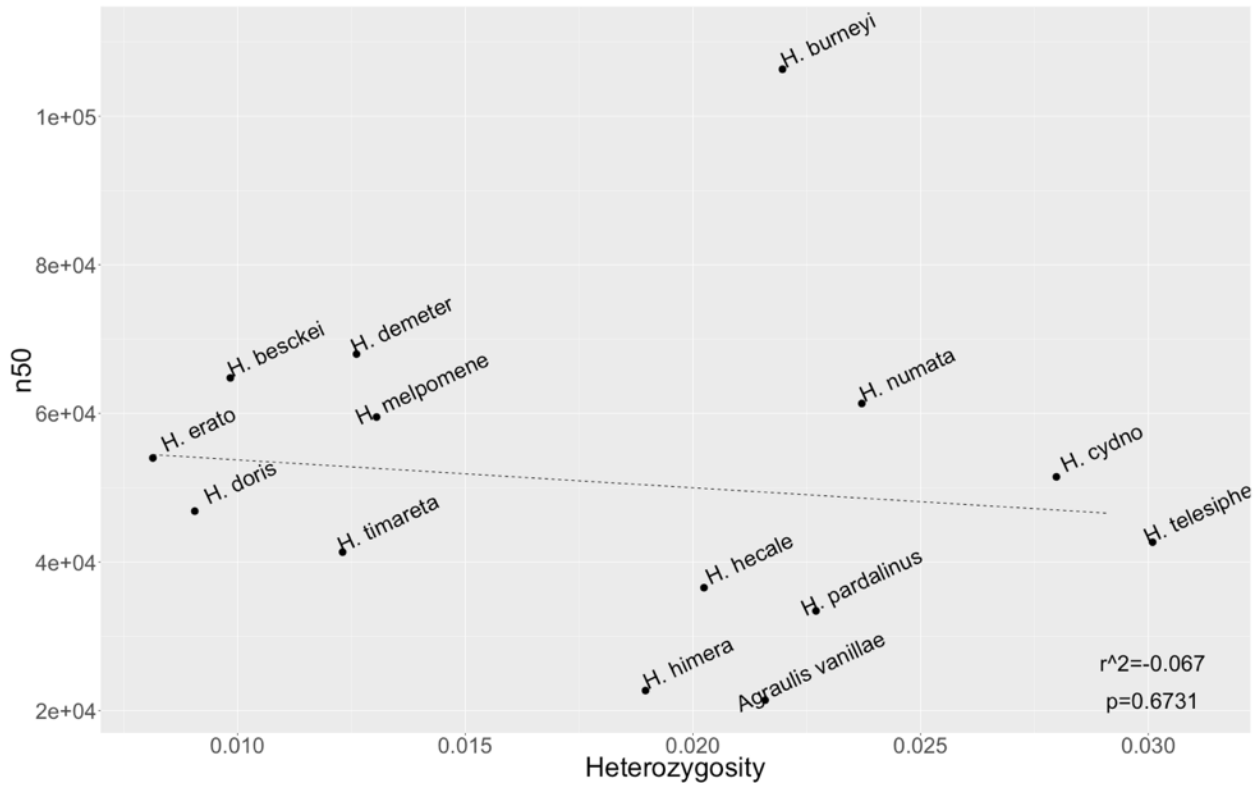

Fig. S3 Relationship of N50 to heterozygosity

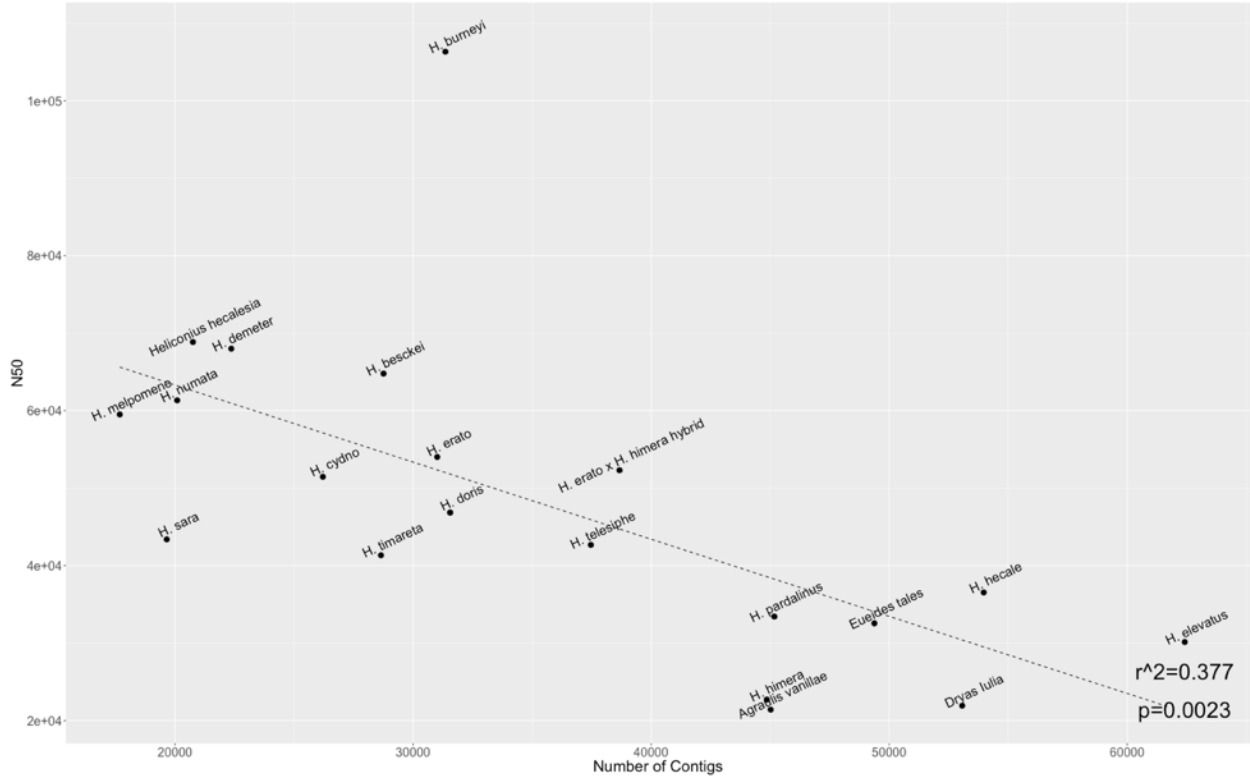

Fig. S4 Relationship of N50 to number of contigs

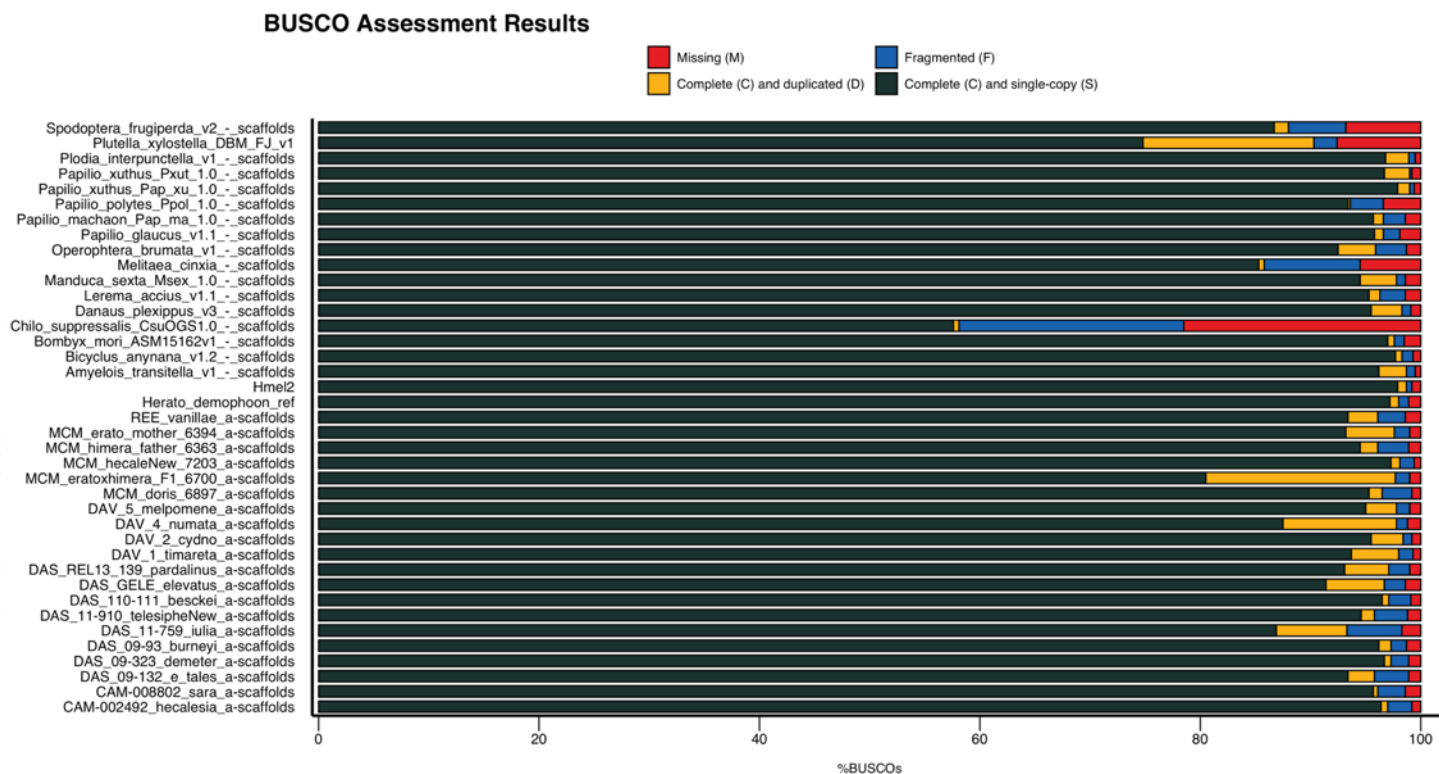

**Fig. S5 BUSCO gene content**

*This plot displays BUSCO results from all de novo genomes assembled here, as well as other lepidopteran genomes obtained from lepbases.org. All bars below "Herato\_demopoon\_ref" are results of this study. Gene content is comparable between the w2rap assemblies and other lepidopteran assemblies, though the percentage of complete genes identified in w2rap genomes is slightly lower, and percent duplicated slightly higher, than the highest quality reference Lepidoptera genomes.*



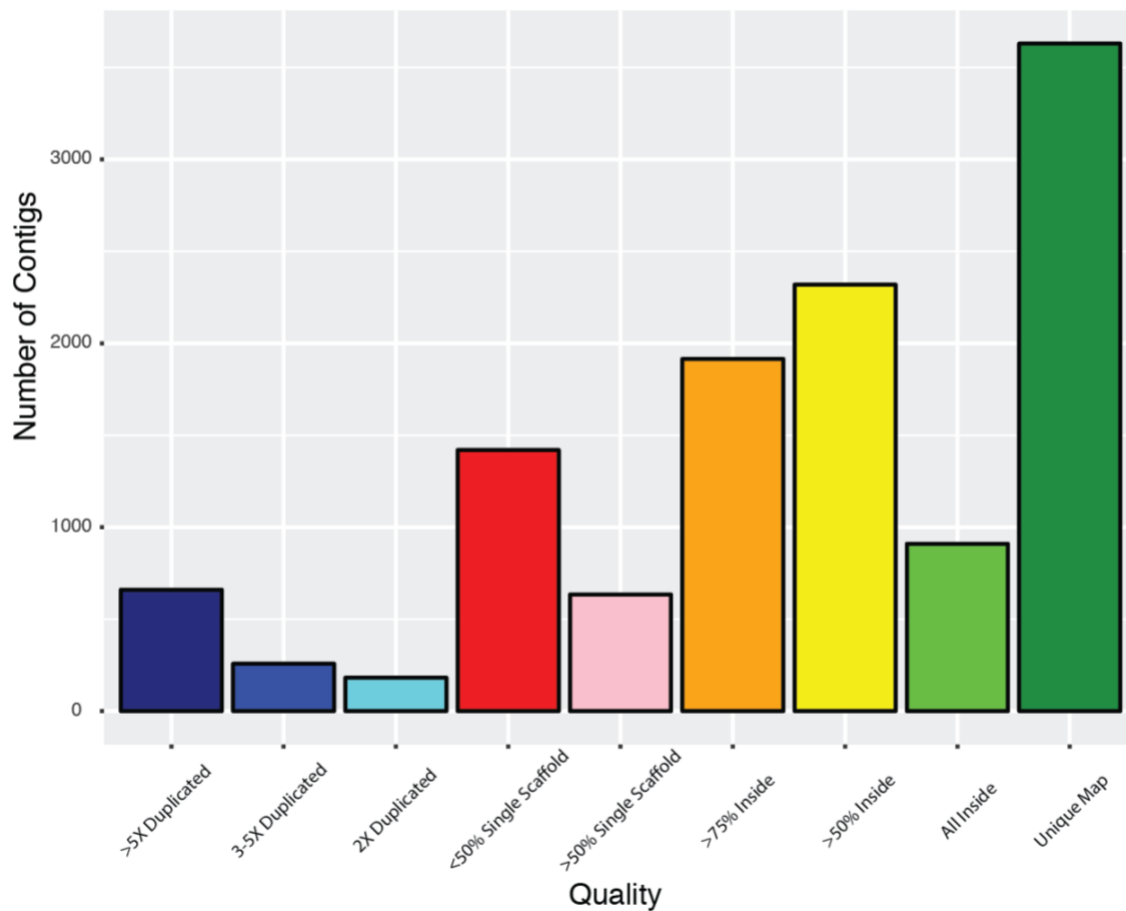

**Fig. S6 *H. melpomene* w2rap to Hmel2 contig alignment quality**

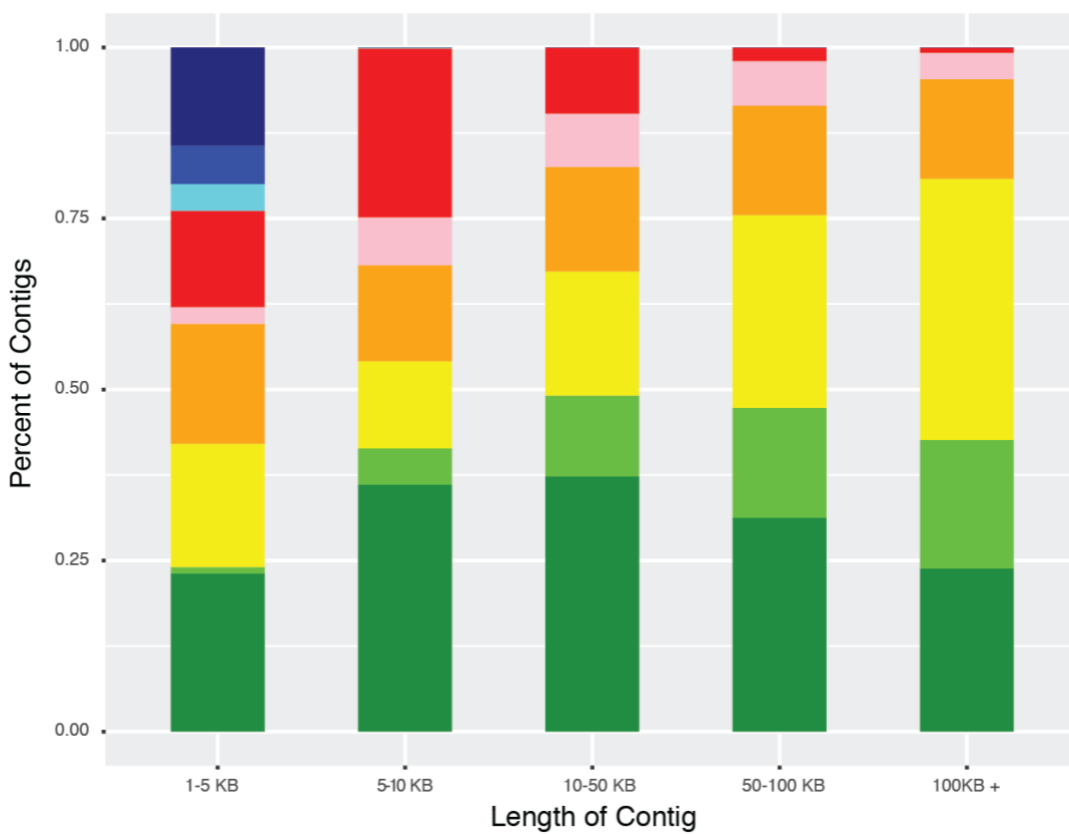

**Fig. S7 Contig alignment quality by contig size**

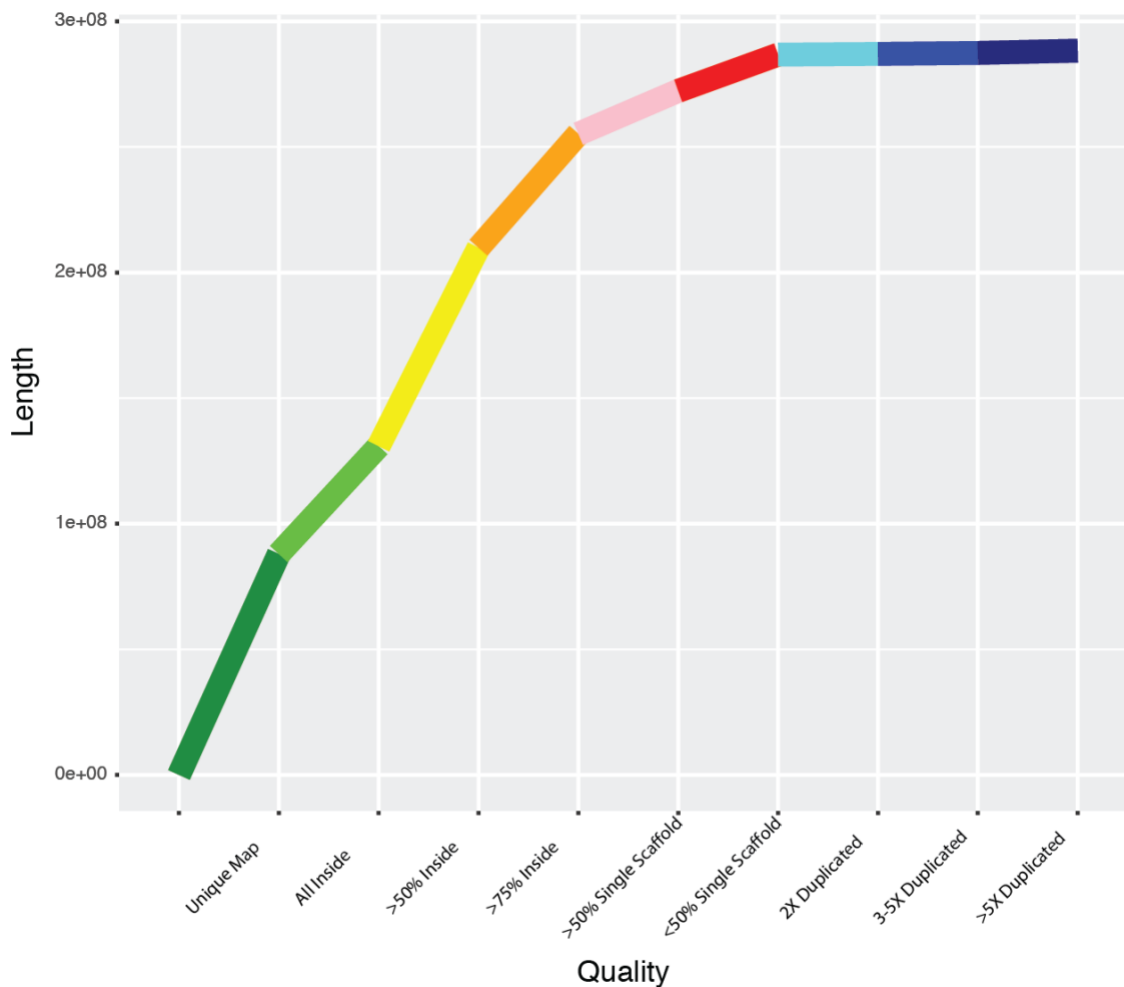

**Fig. S8 Cumulative alignment length by quality**

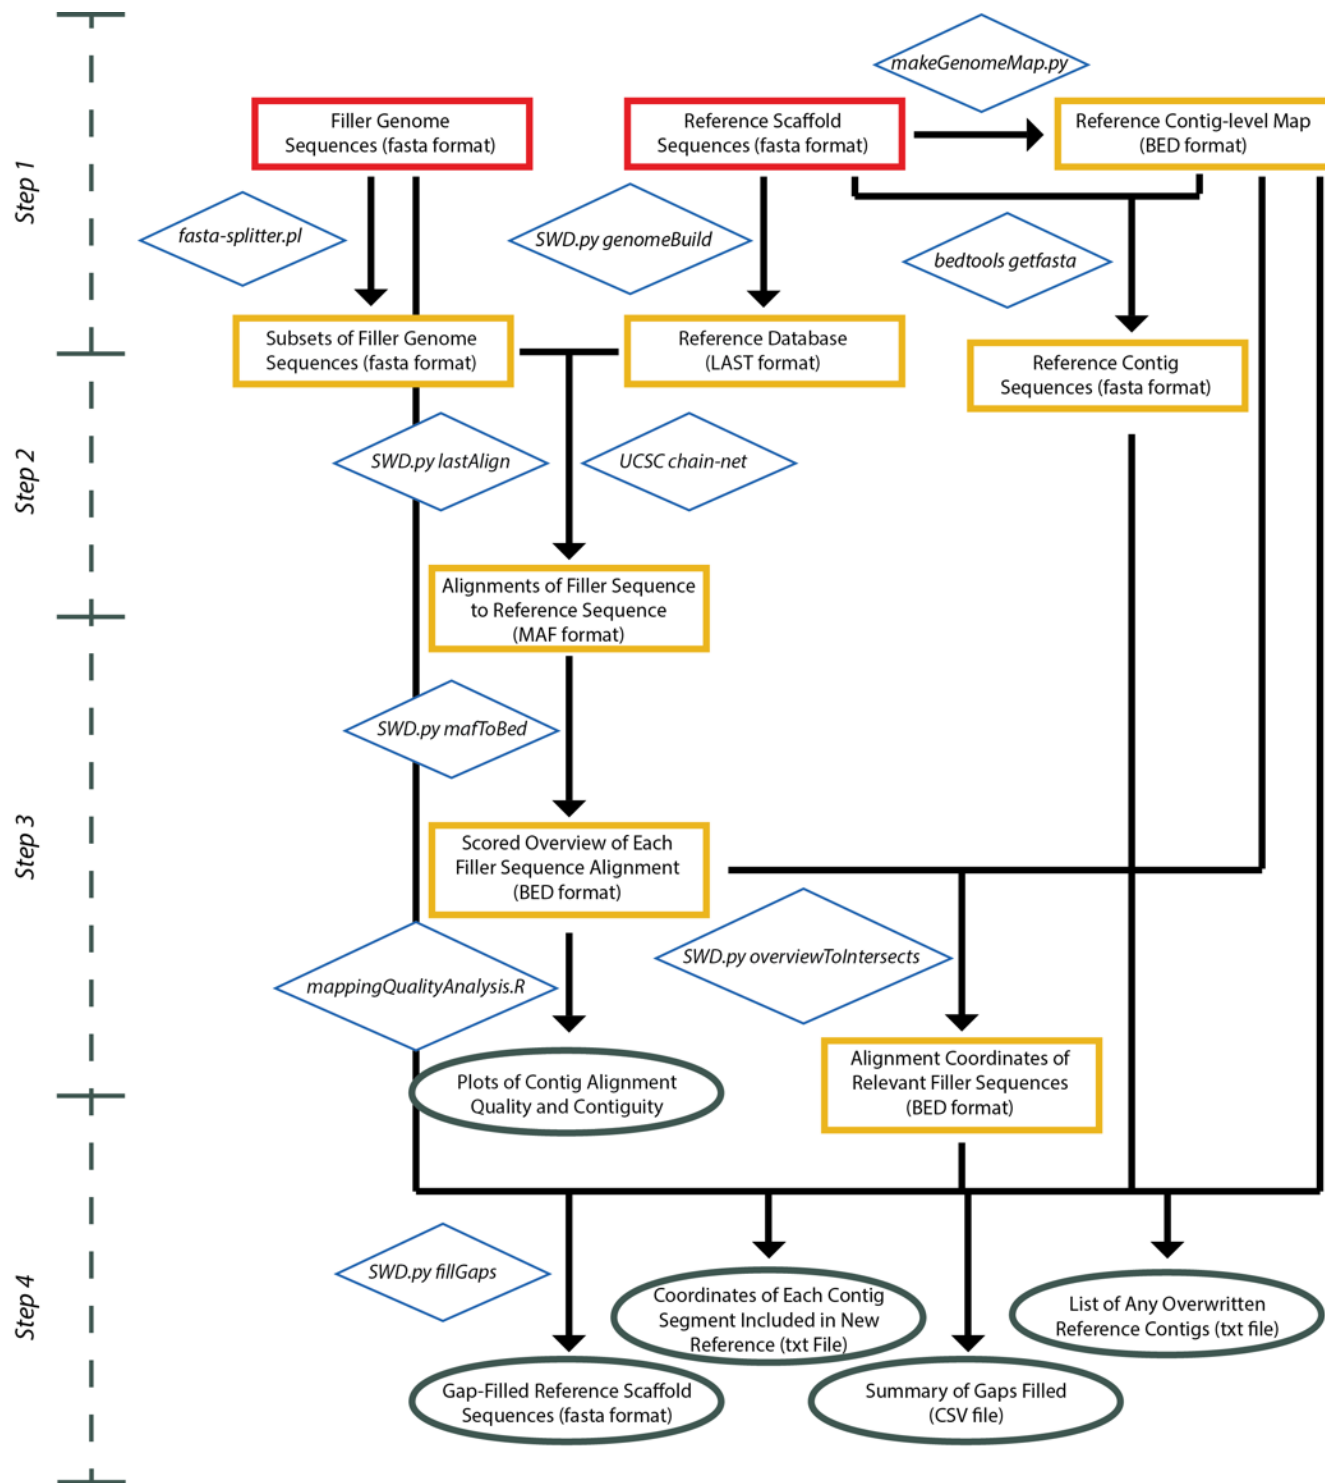

**Fig. S9 Scaffolding with DISCOVER flow chart**

Required input files are outlined with red boxes, intermediate data files are outlined with gold boxes, and final outputs are outlined with green boxes. Blue diamonds adjacent to arrowed lines hold scripts used to convert the file(s) at the base of the arrow to the file(s) at the tips. Many of these rely on previously published tools (*fasta-splitter.pl* was written by K. Kryukov; many scripts rely on *bedtools*). Further details about each step are given in the text above.

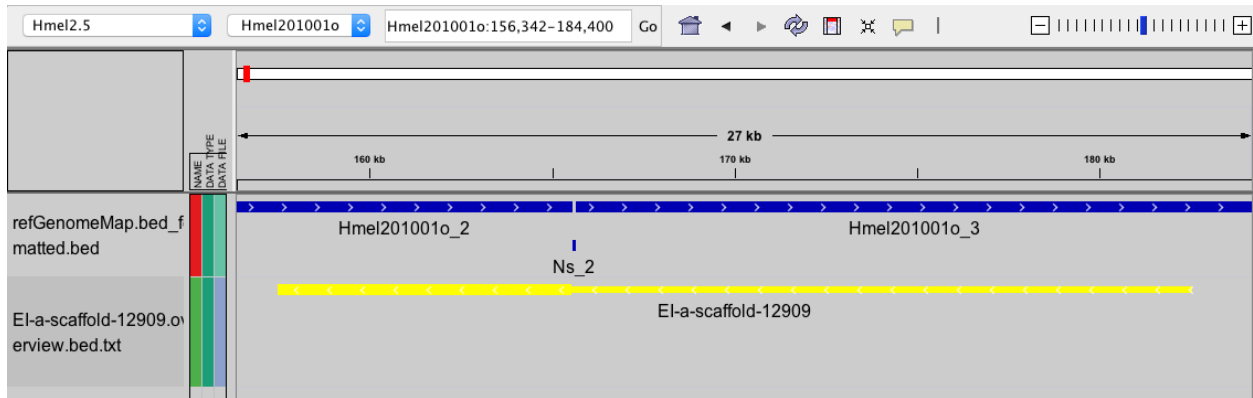

**Fig. S10 Example overview alignment**

*This screenshot from IGV shows a 27 kb region of Hmel2.5 chromosome 1. The blue track displays the location of reference contigs Hmel201001o\_2 and Hmel201001o\_3, as well as the stretch of Ns that separates them. The yellow track shows the longest sub-alignment of the de novo H. melpomene genome contig EI-a-scaffold-12909, which overlaps with Hmel201001o\_2 (thick line). When we project the remainder of EI-a-scaffold-12909 based on the location of the sub-alignment (thin line), we see that it is expected to continue on to Hmel201001o\_3. This overview is colored yellow, indicating that more than 75% of the sub-alignments of this contig are found within the projected area, as can be seen in Fig. S11.*

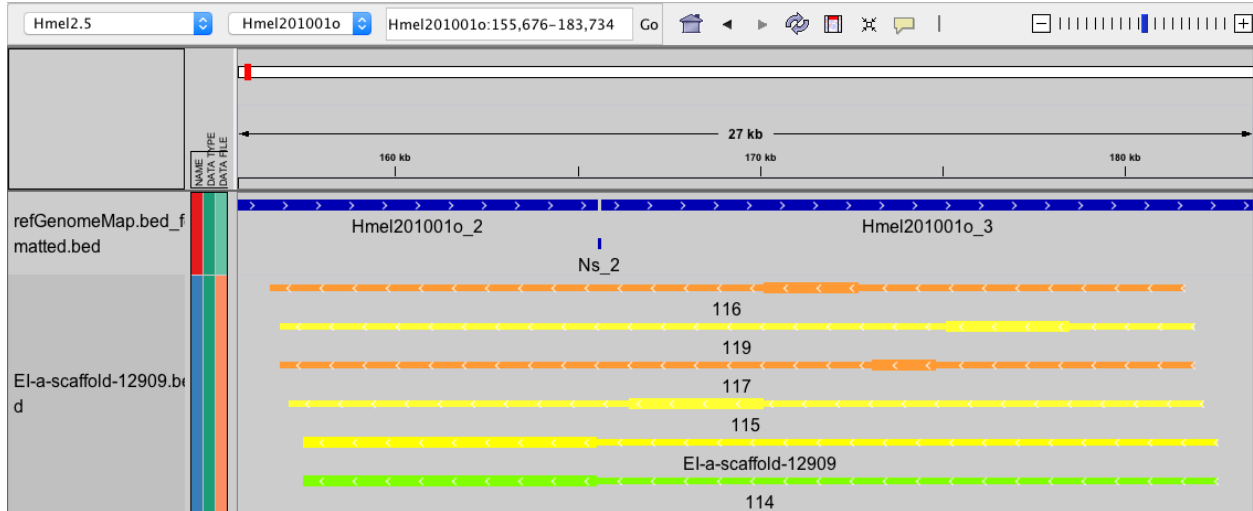

**Fig. S11 Example full contig alignment**

*Here, the remaining sub-alignments of EI-a-scaffold-12909 are displayed in the same manner as the overview – the thick lines indicate the location of the sub-alignment, while the thin lines project the position of the contig based on the aligned region. One can see that the sub-alignments are located in positions expected if Hmel201001o\_2 and Hmel201001o\_3 are in fact contiguous. The alignments labeled 114-119 are the sub-alignments, and their colors are simply an indication of size relative to the full contig.*

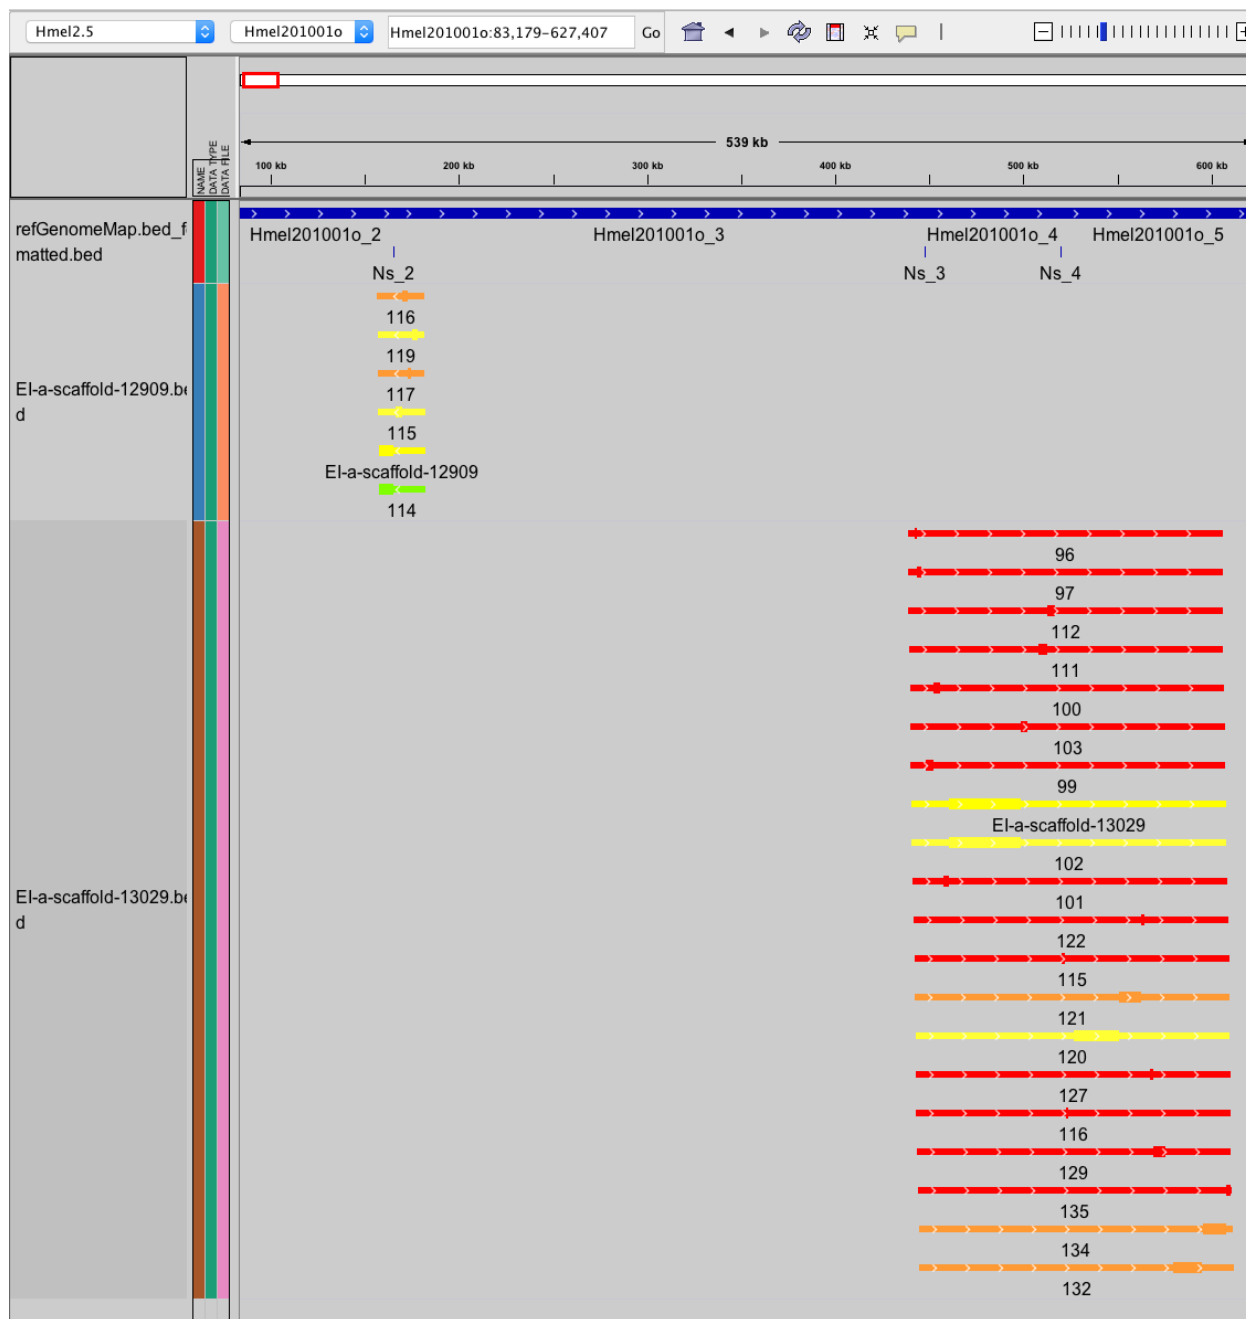

**Fig. S12 Example full group alignment**

Here, we see that *EI-a-scaffold-13029* maps to reference contig *Hmel201001o\_3* as well, and also connects to *Hmel201001o\_4* and *Hmel201001o\_5*. These regions are treated as a group, and are joined into a single super-scaffold, keeping as much of the reference contigs as possible but joining them together with the filler contigs (See Table S5). Three regions of the de novo filler genome (names beginning with *EI*) were used to connect the four reference contigs (names beginning with *Hmel*) in the group. Each of these regions is between 500 and 1300 base pairs, and replaces fewer than 1000 bp of any individual reference contig.

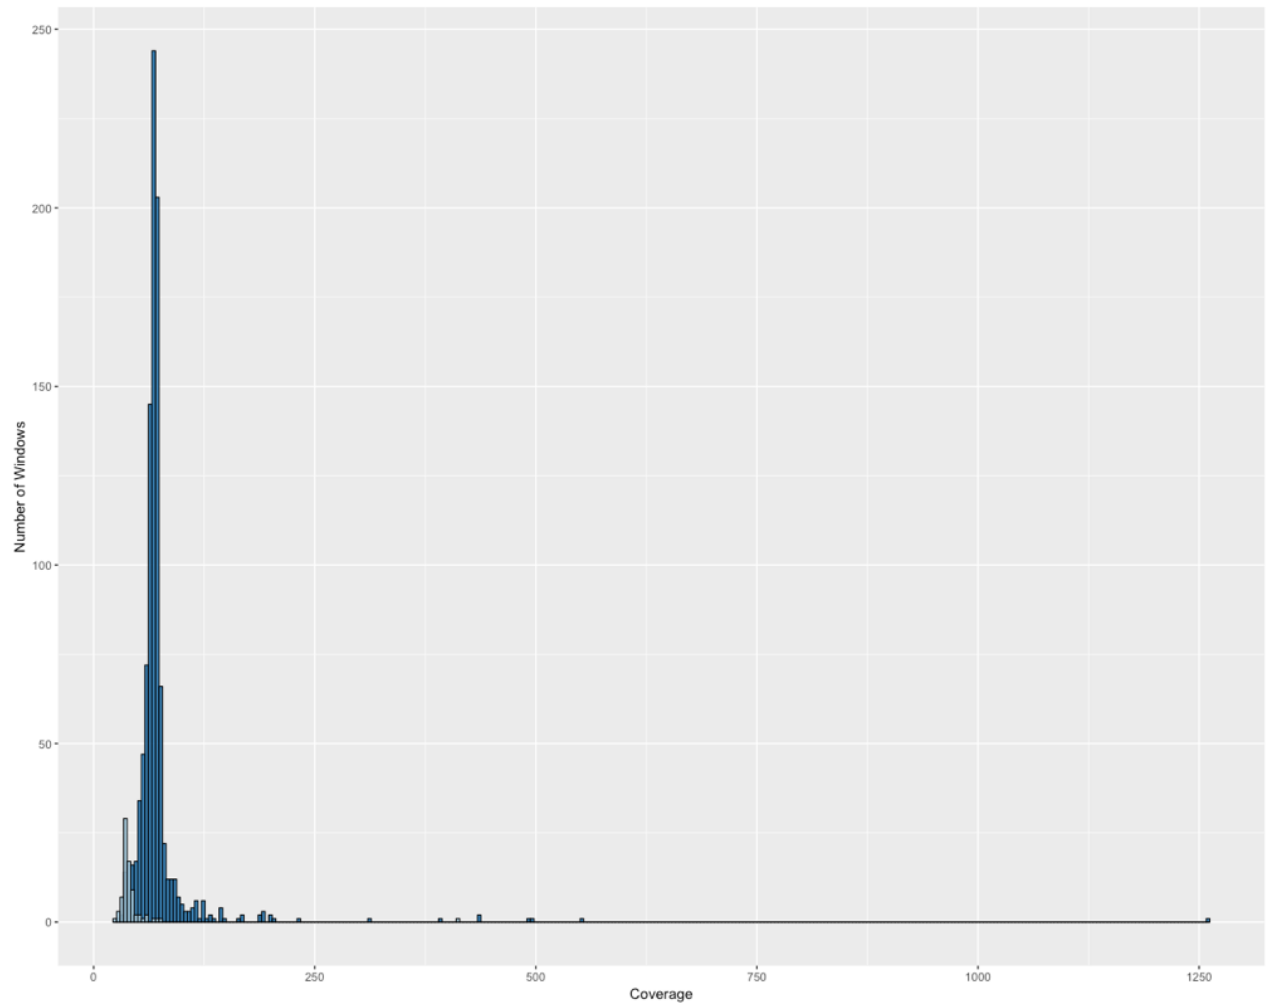

**Fig. S13 Coverage of gap-filled regions**

*Histogram of mean coverage in 10 kb windows overlapping gap-filled regions. Light blue is the Z chromosome, and dark blue is autosomes.*



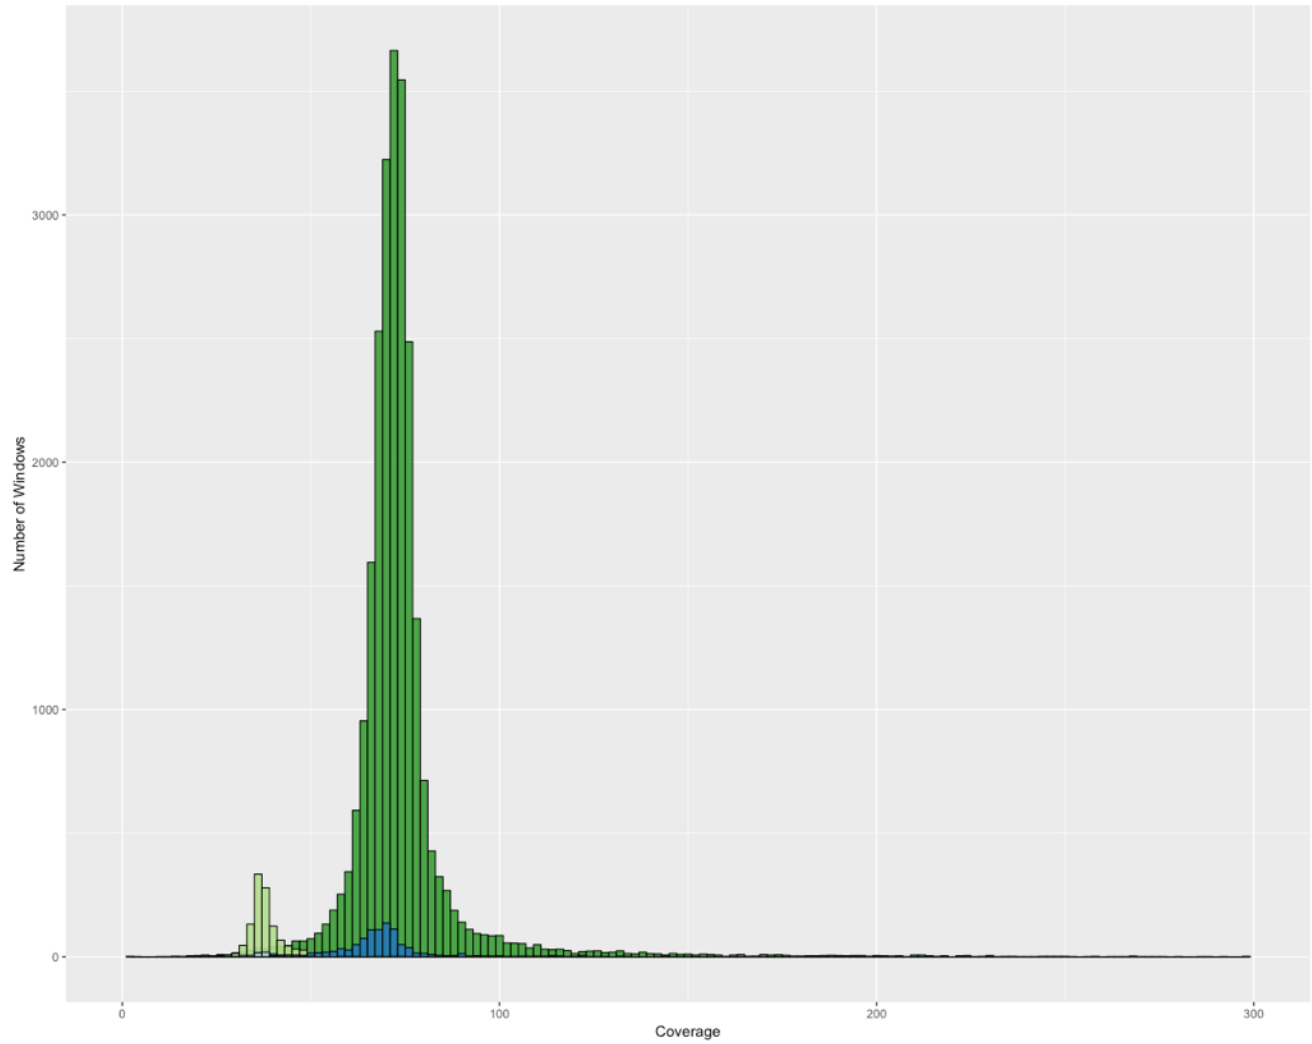

**Fig. S14 Coverage of gap-filled and non gap-filled regions**

*Histogram of mean coverage in 10 kb windows. Blues are the same data as Fig. S13, light green is non gap-filled Z chromosome, and dark green is non gap-filled autosomes*

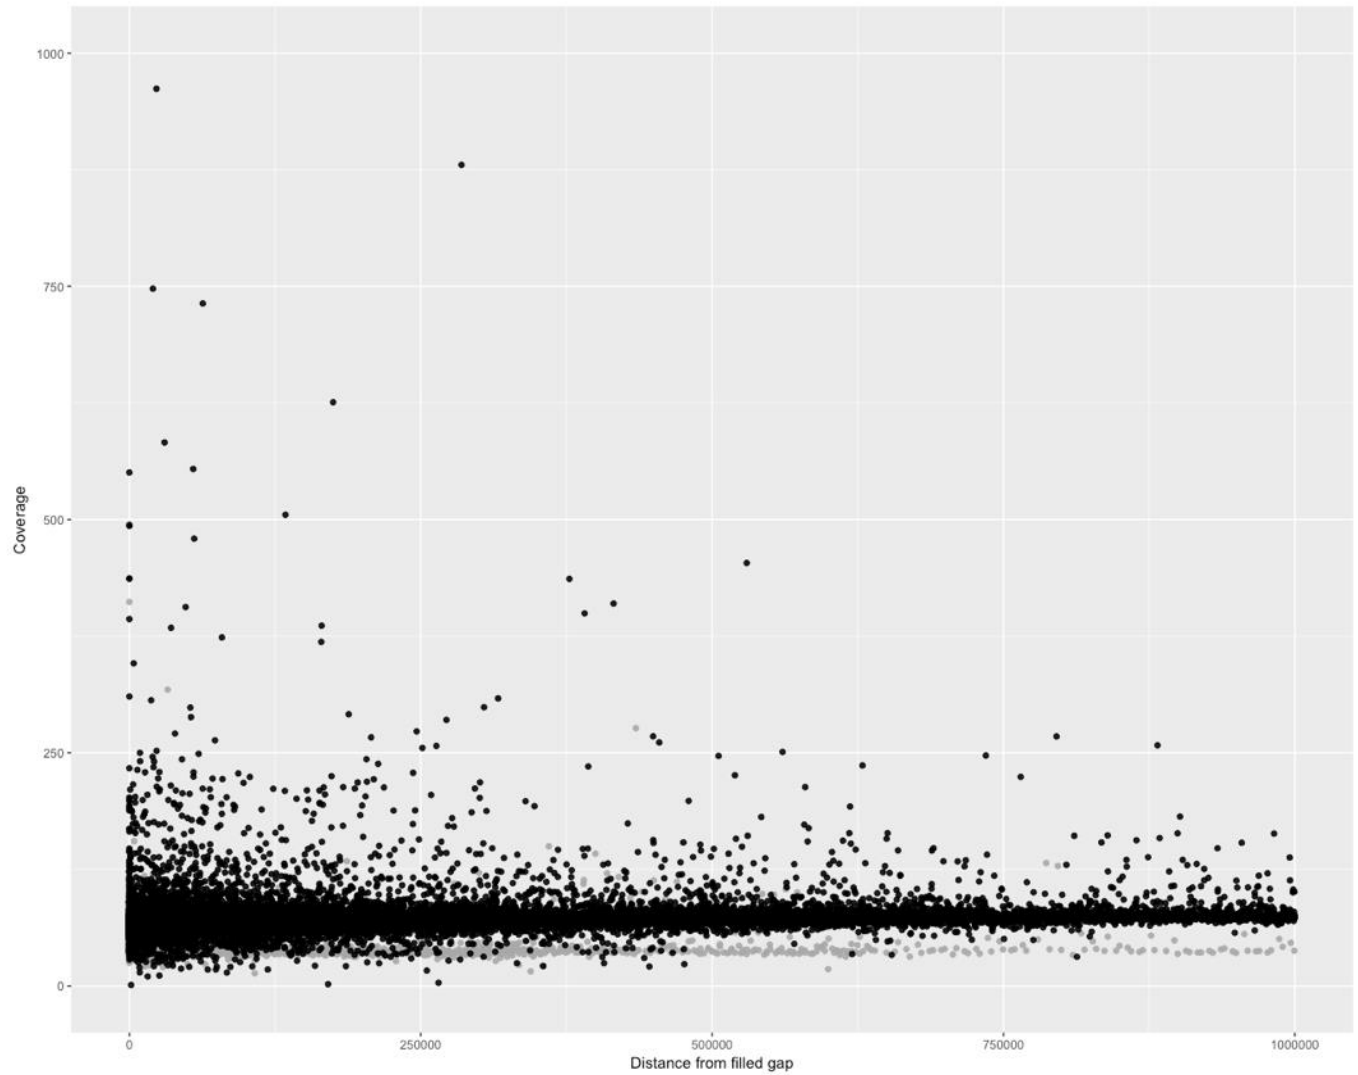

**Fig. S15 Coverage with distance from filled gap**

*Histogram of mean coverage in 10 kb windows with distance from the nearest filled gap on the x-axis. Gaps tend to be in repetitive regions, as seen by increased coverage near zero, but the increase in coverage begins well before the filled gap itself.*

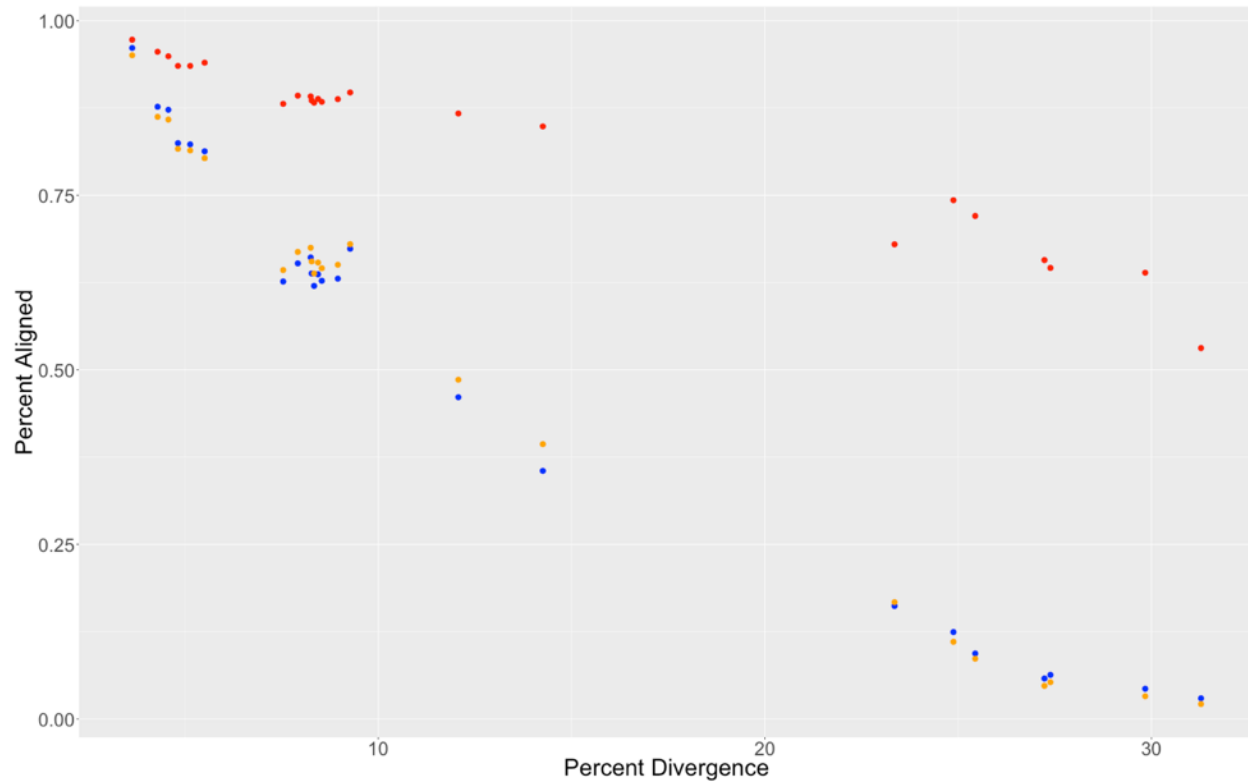

**Fig. S16 Pairwise alignment depth**

*Fig. S16 and Table S7 Pairwise coverages show the pairwise alignment depth between other Lepidoptera and Hmel2.5 in the progressiveCactus alignment. The "percent divergence" metric is the pairwise distance in concatenated non-coding regions aligned among all species. Exons are shown in red, introns in orange, and intergenic regions in blue.*

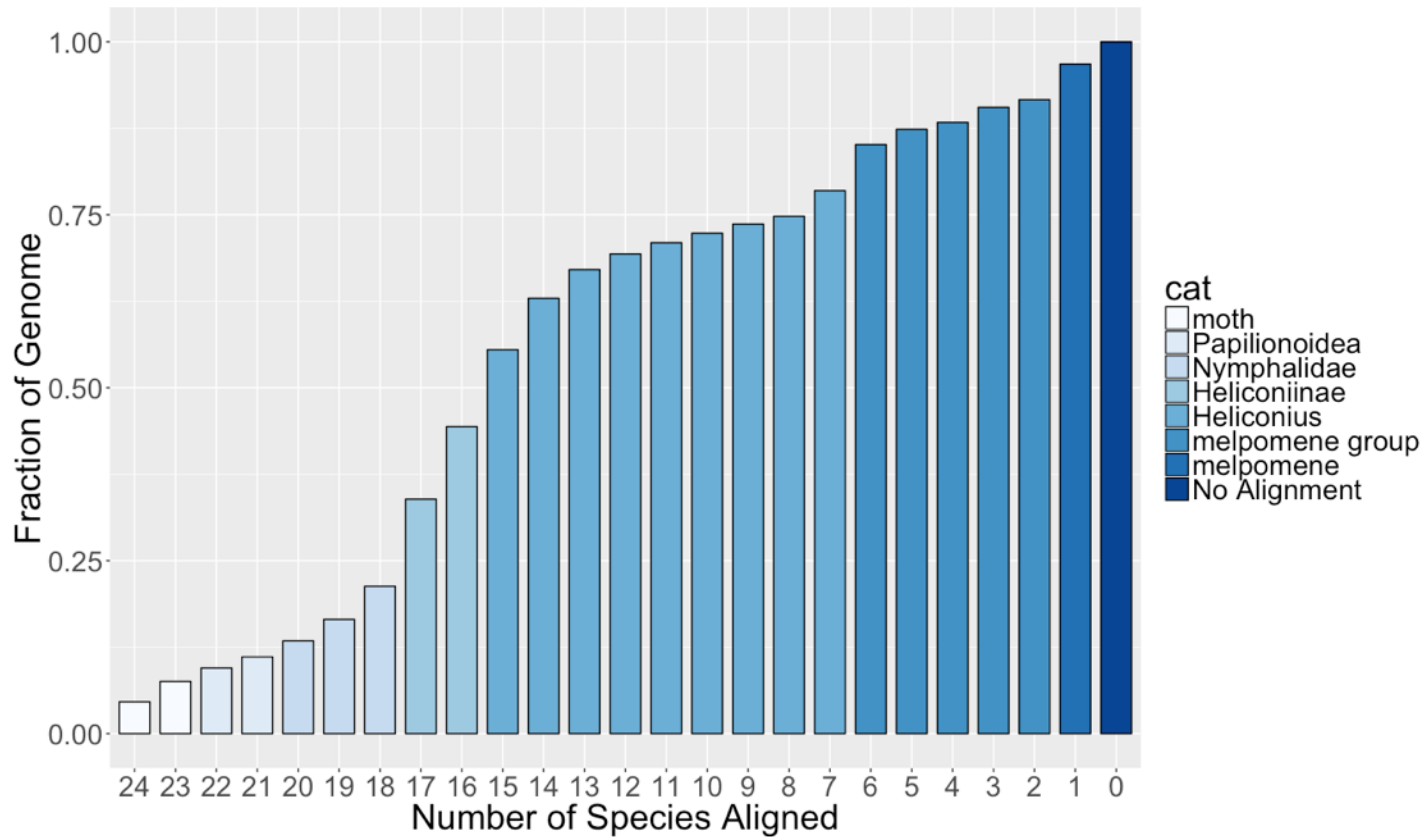

**Fig. S17 Cumulative alignment depth to *H. melpomene* Hmel2.5**

*The Y-axis shows the percentage of Hmel2.5 sites that are aligned at least once among at least the number of species indicated on the X-axis. Colors represent the narrowest taxonomic category that corresponds to each number of species. For example, there are 15 Heliconius species not including Hmel2. Critically, however, the values of each bar correspond to number of species. The colors are therefore only a qualitative visual aid.*

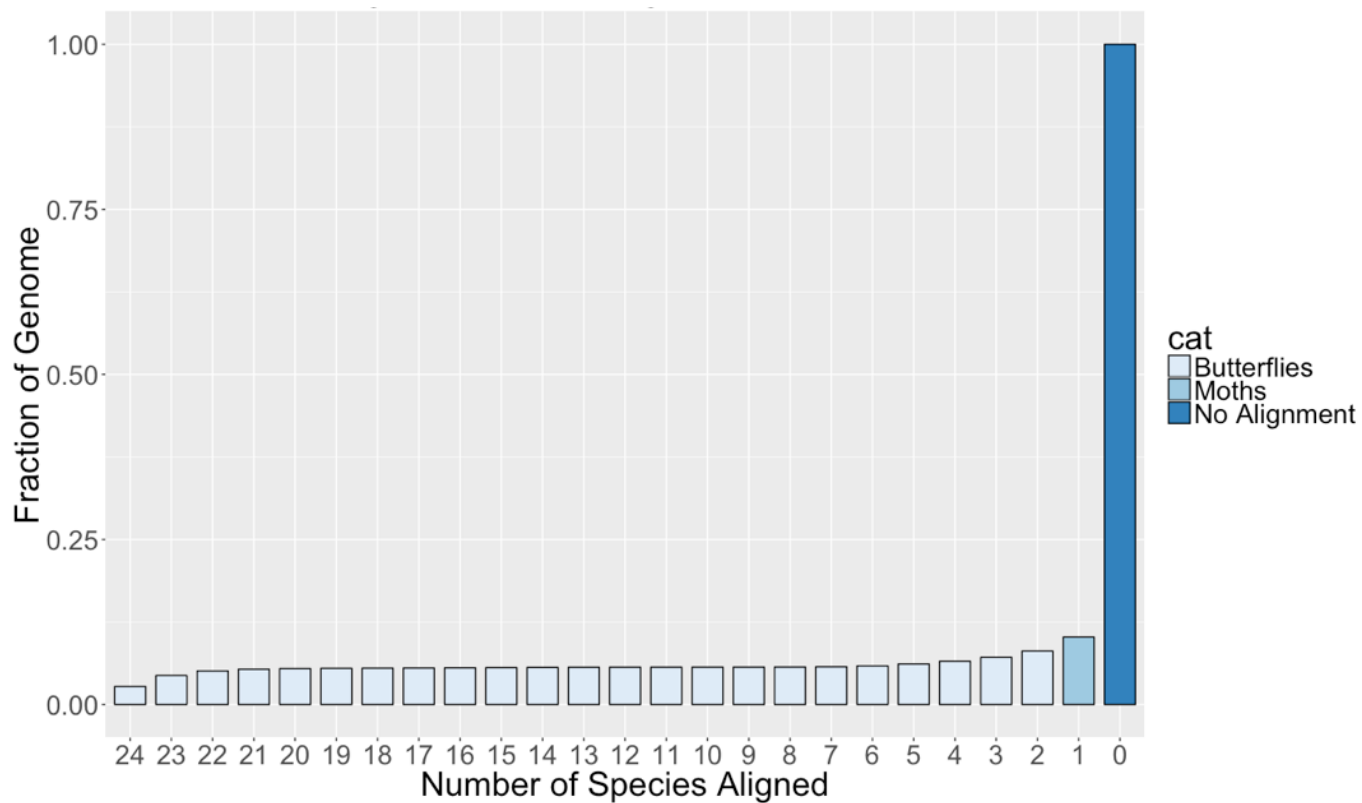

**Fig. S18 Cumulative alignment depth to *B. mori***

*Same as Fig. S17, but using B. mori as the reference genome. Very little of the B. mori genome aligns to any other lepidopteran genome assemblies employed here.*

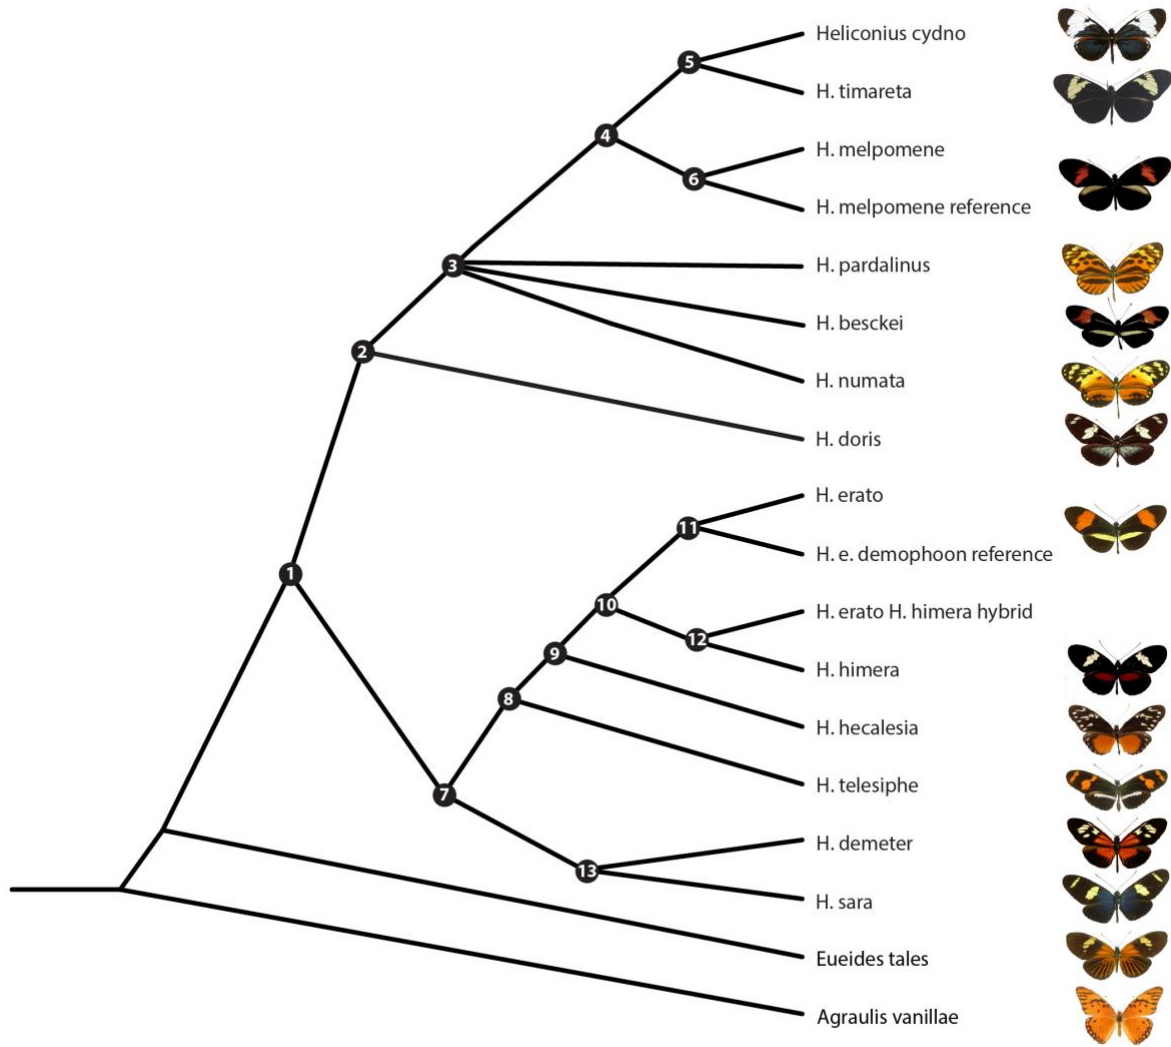

**Fig. S19 Consensus phylogeny**

*Numbers on nodes correspond to Fig. S20*

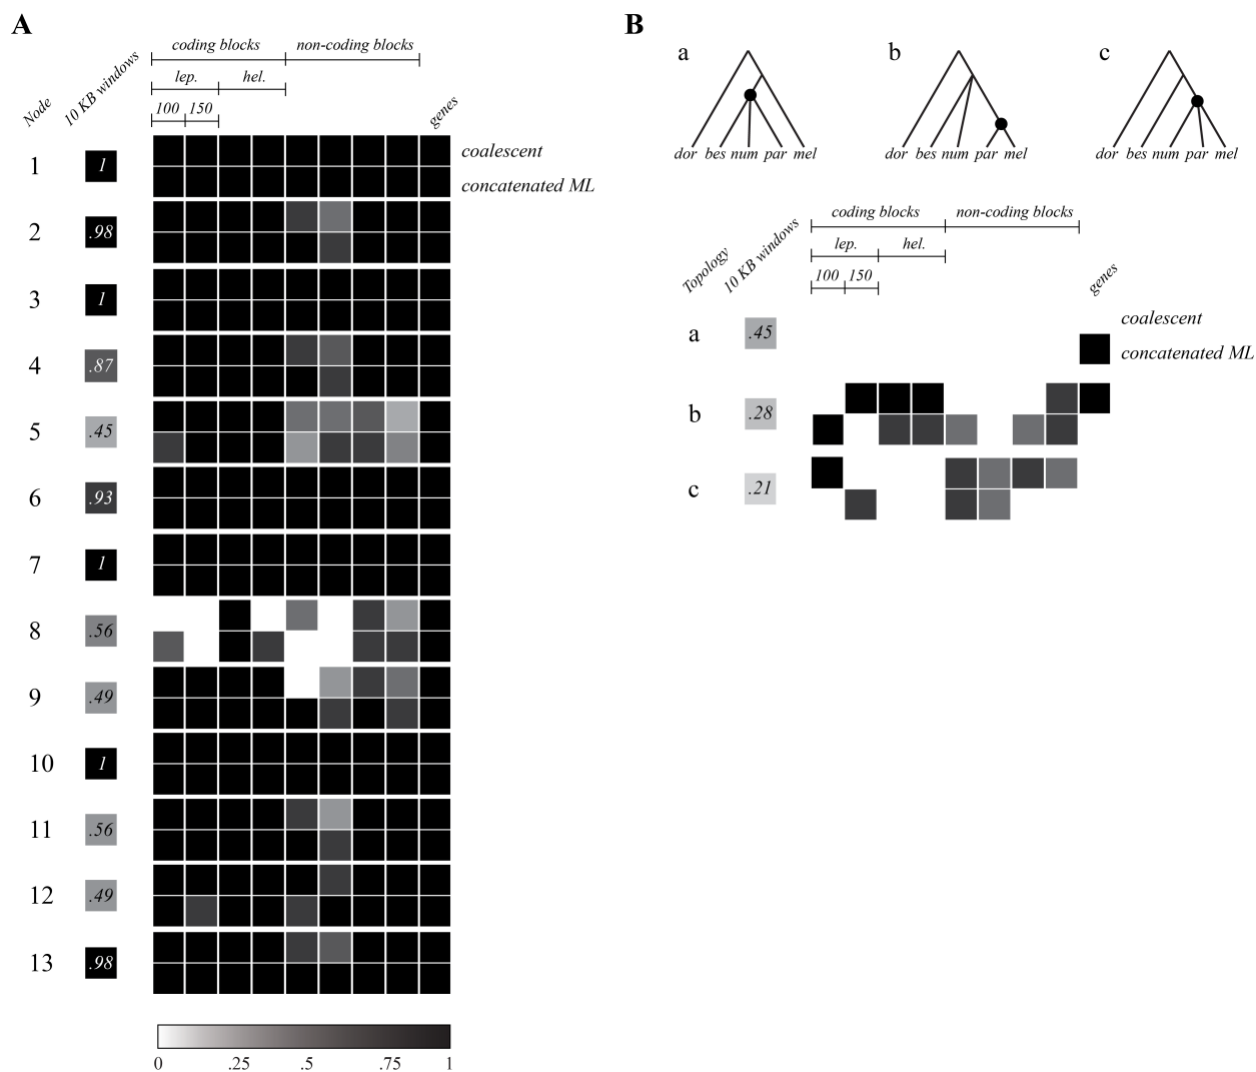

**Fig. S20 Summary of node support**

**A.** Each set of 19 squares corresponds to a node numbered as in Fig. S19 above. The first column, 10 kb windows, shows the percent of 10 kb windows that recover the given node. These values correspond to the grey scale in main text Fig. 1A. The remaining blocks indicate support for the given node in the species tree reconstruction method indicated above each column. If a square is filled, that node was recovered in the corresponding species tree reconstruction. Grey scale indicates level of support as bootstrap value (concatenated methods) or node support value (coalescent methods). **B.** Because no topology was overwhelmingly supported for the silvaniform clade, it was maintained as a polytomy in Fig. 1A. Topologies (a) – (c) illustrate the three supported species groupings. The grids below show relative support for each topology, and are arranged as in A.

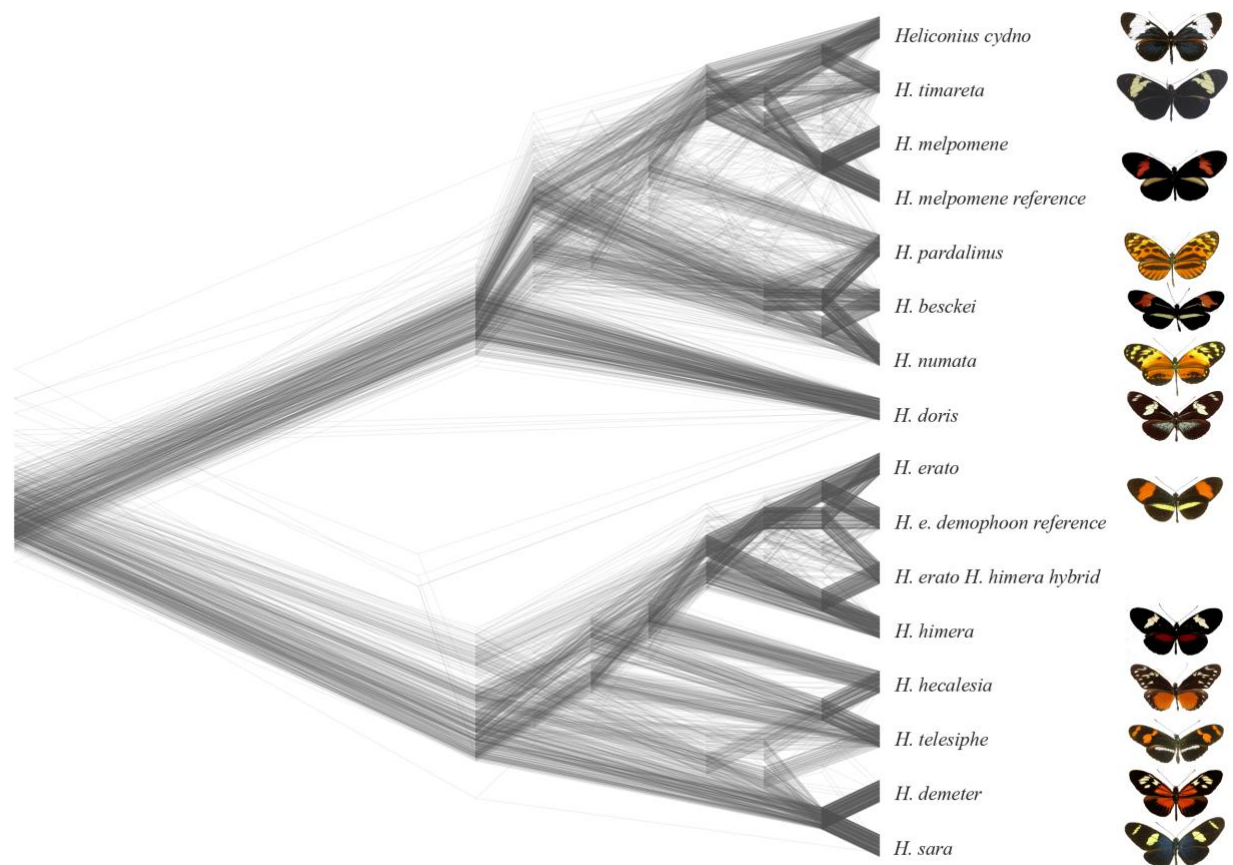

**Fig. S21 DensiTree plot with normalized branch lengths**

*Trees are calculated from 10 kb windows, and are the same subset as in main text Fig. 1A. Branch length information has been removed, so that the depth of each node is based only on its order in the topology.*



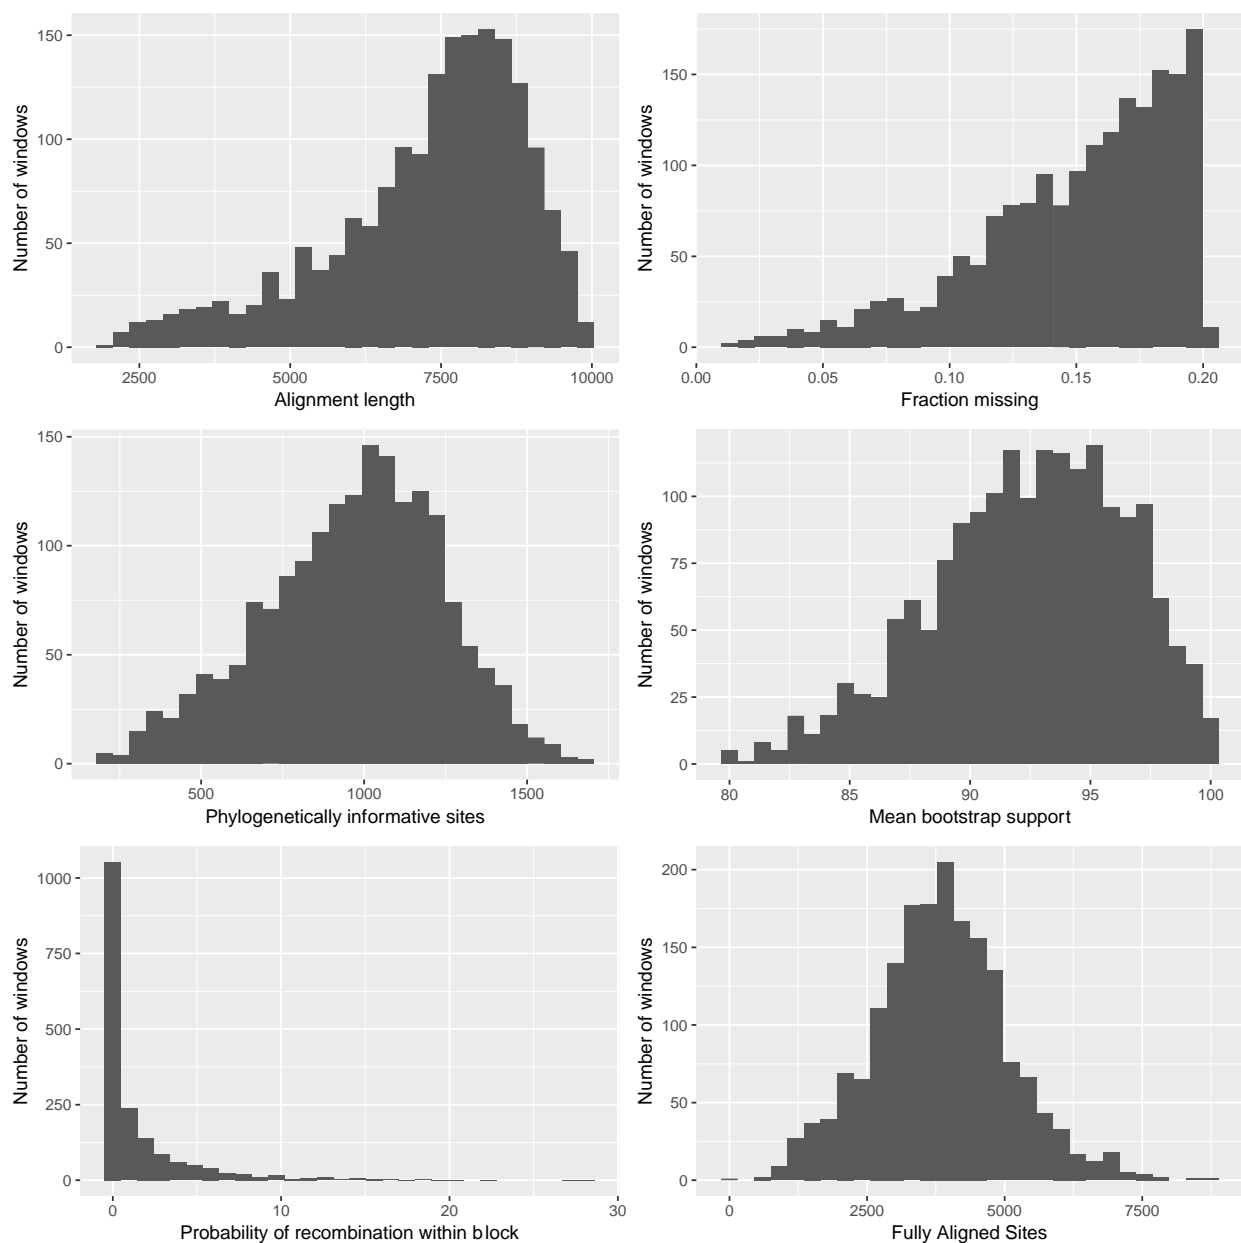

**Fig. S22 *Heliconiini* 10 kb block statistics**

*Basic statistics for trees used to generate DensiTrees in Fig. 1A. Alignment length refers to the final length of the alignment, filtered for only single-copy regions. Fraction missing is the sum of all gaps divided by total base pairs. Phylogenetically informative sites is number of positions where  $\geq 2$  species carry the alternate allele. Probability of recombination within block is  $-\log_{10}(p)$  value for presence of a recombination event as calculated in (81). Fully Aligned Sites is number of sites in which every species is represented by a non-gap character.*

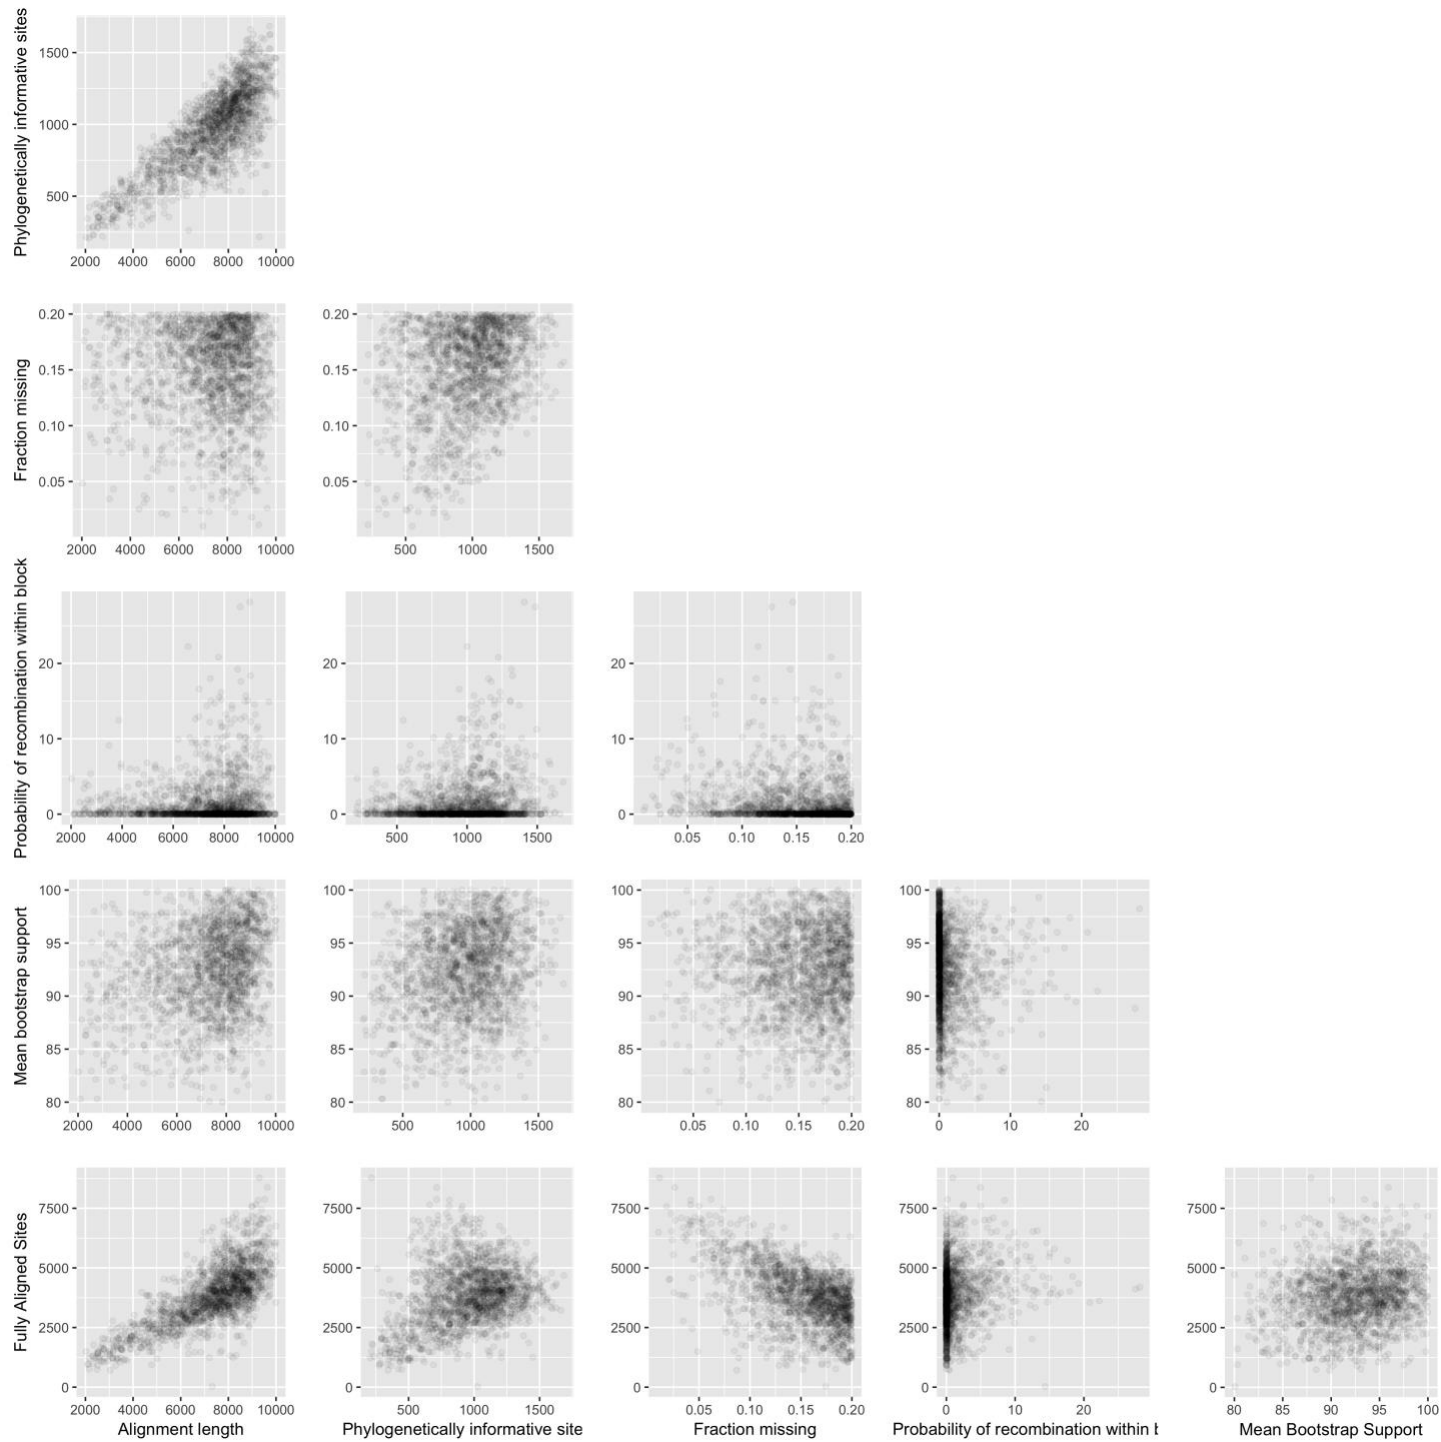

**Fig. S23 *Heliconiini* 10 kb block pairwise statistics**

*Correlations between each pair of window statistics in Fig. S22*

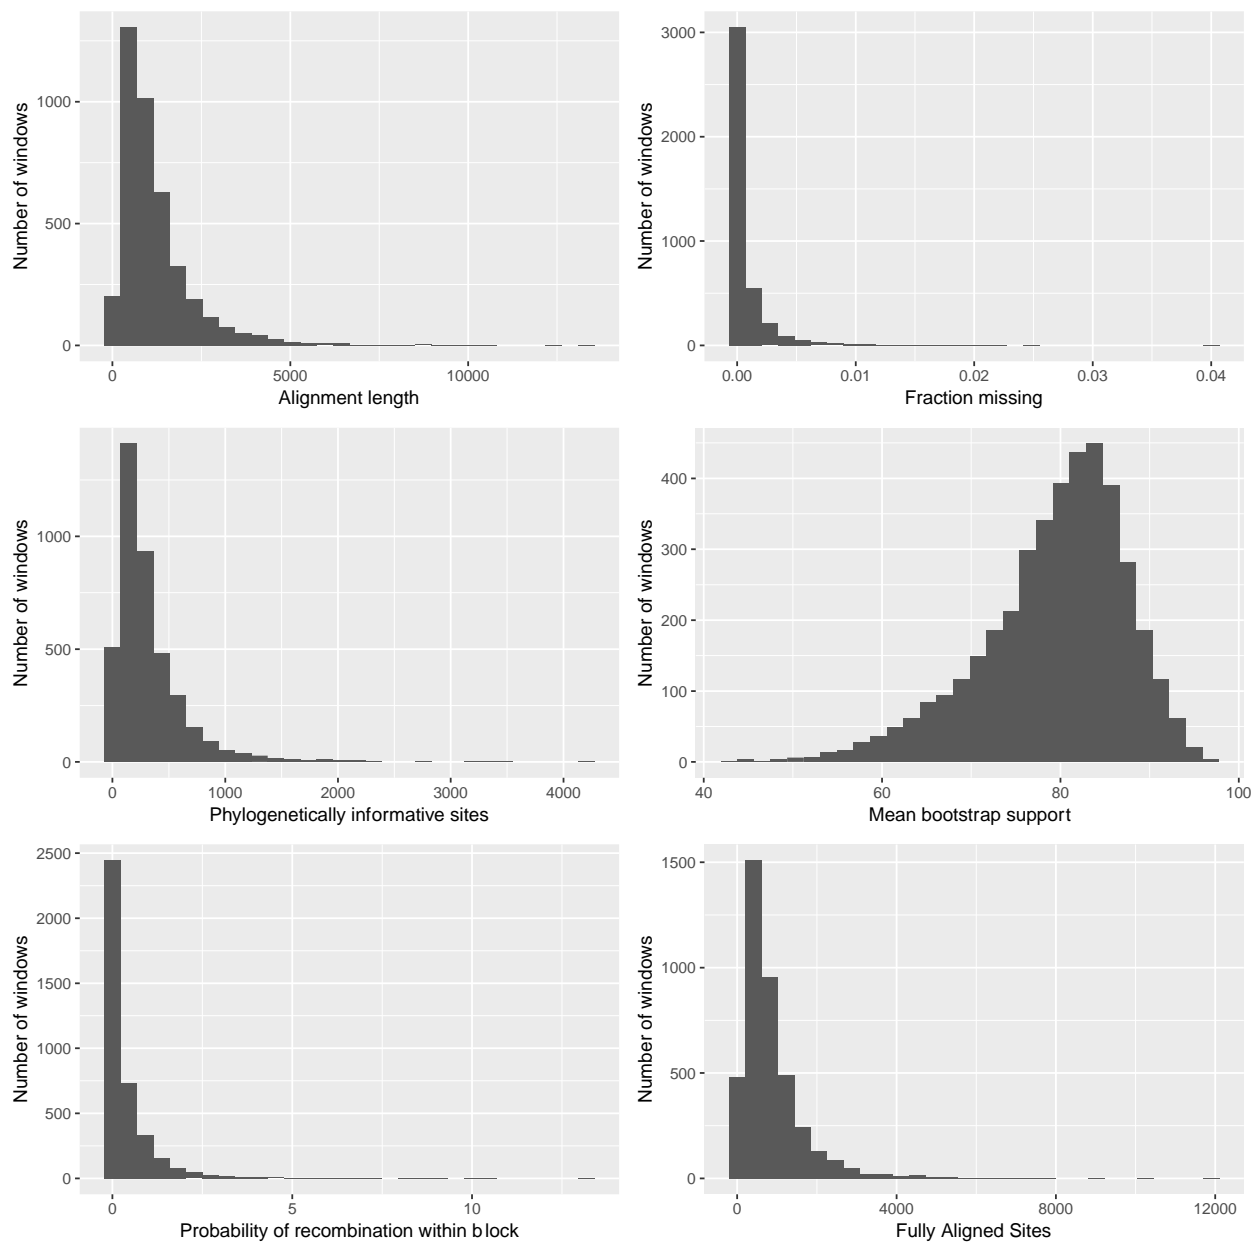

**Fig. S24 gene alignment statistics**

*Basic statistics for gene alignments and resulting trees. Statistics as in Fig. S22*

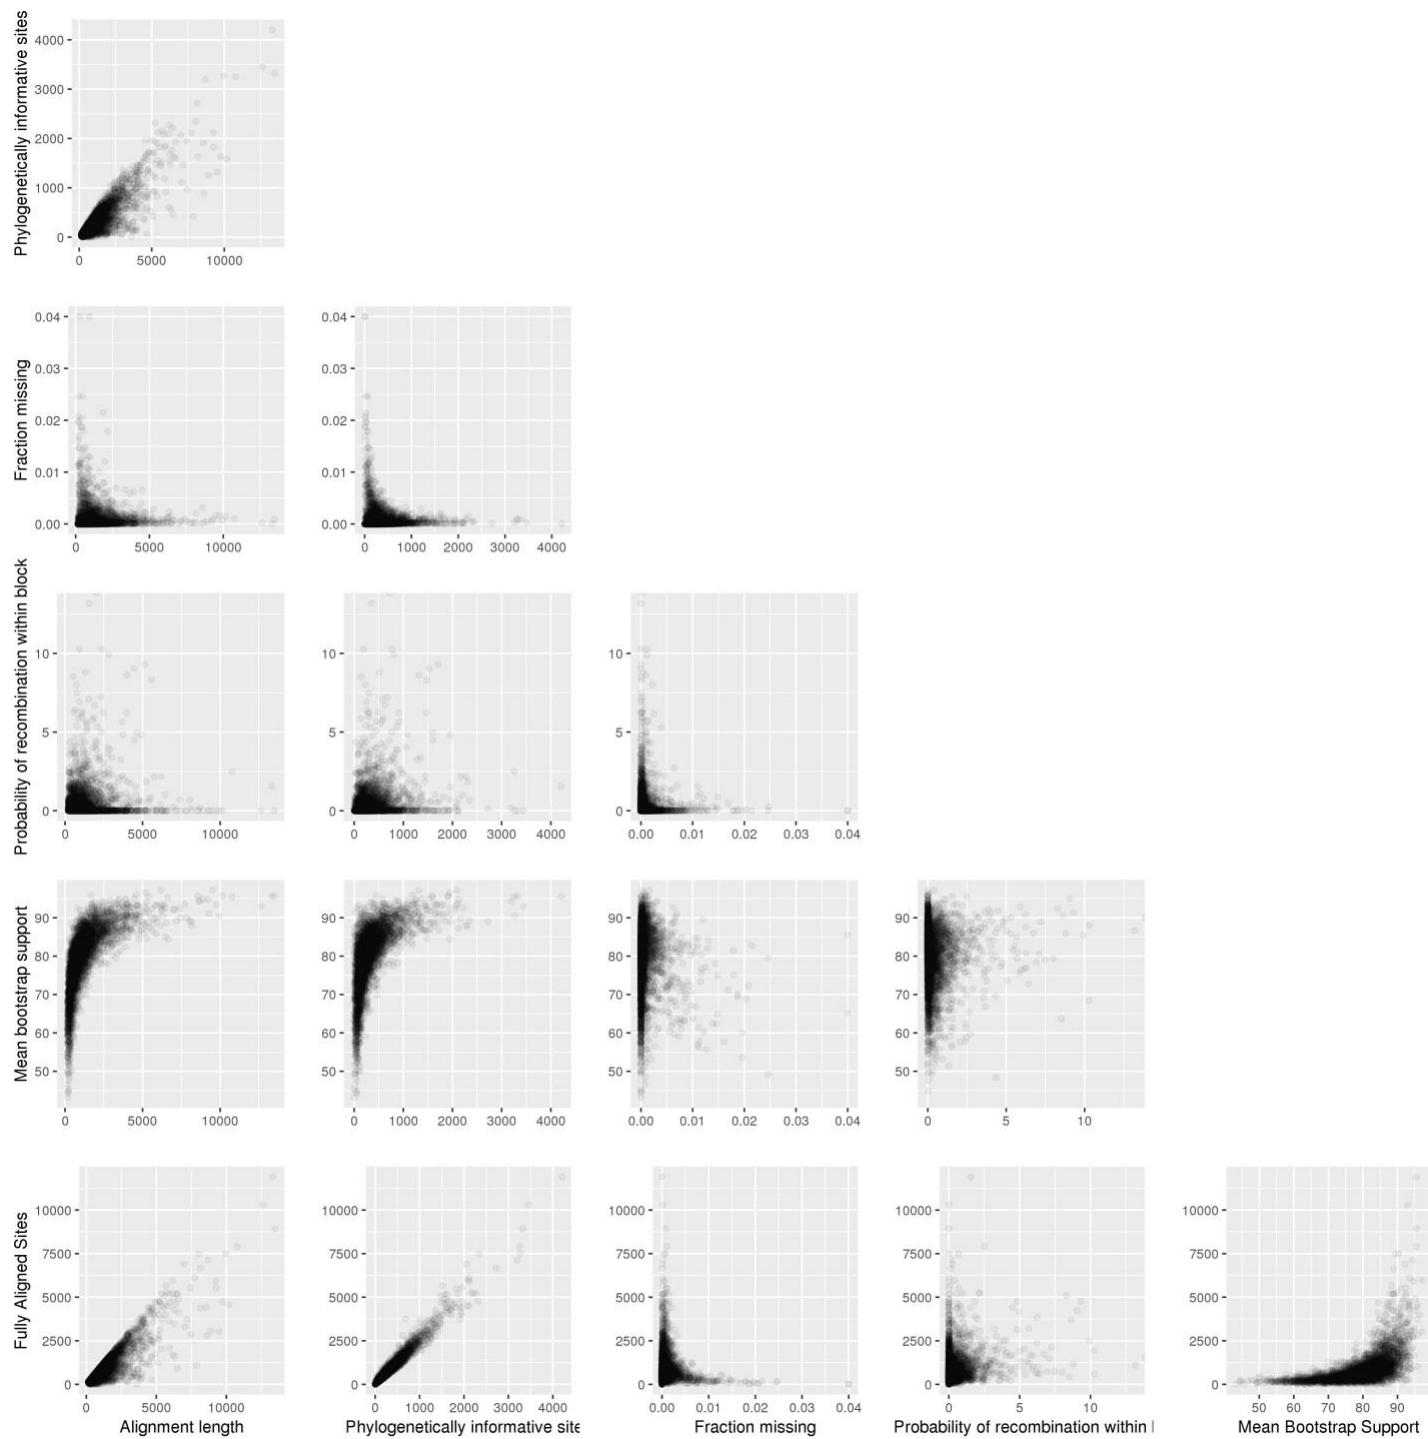

**Fig. S25 Pairwise gene statistics**

*Correlations between each pair of window statistics in Fig. S24*

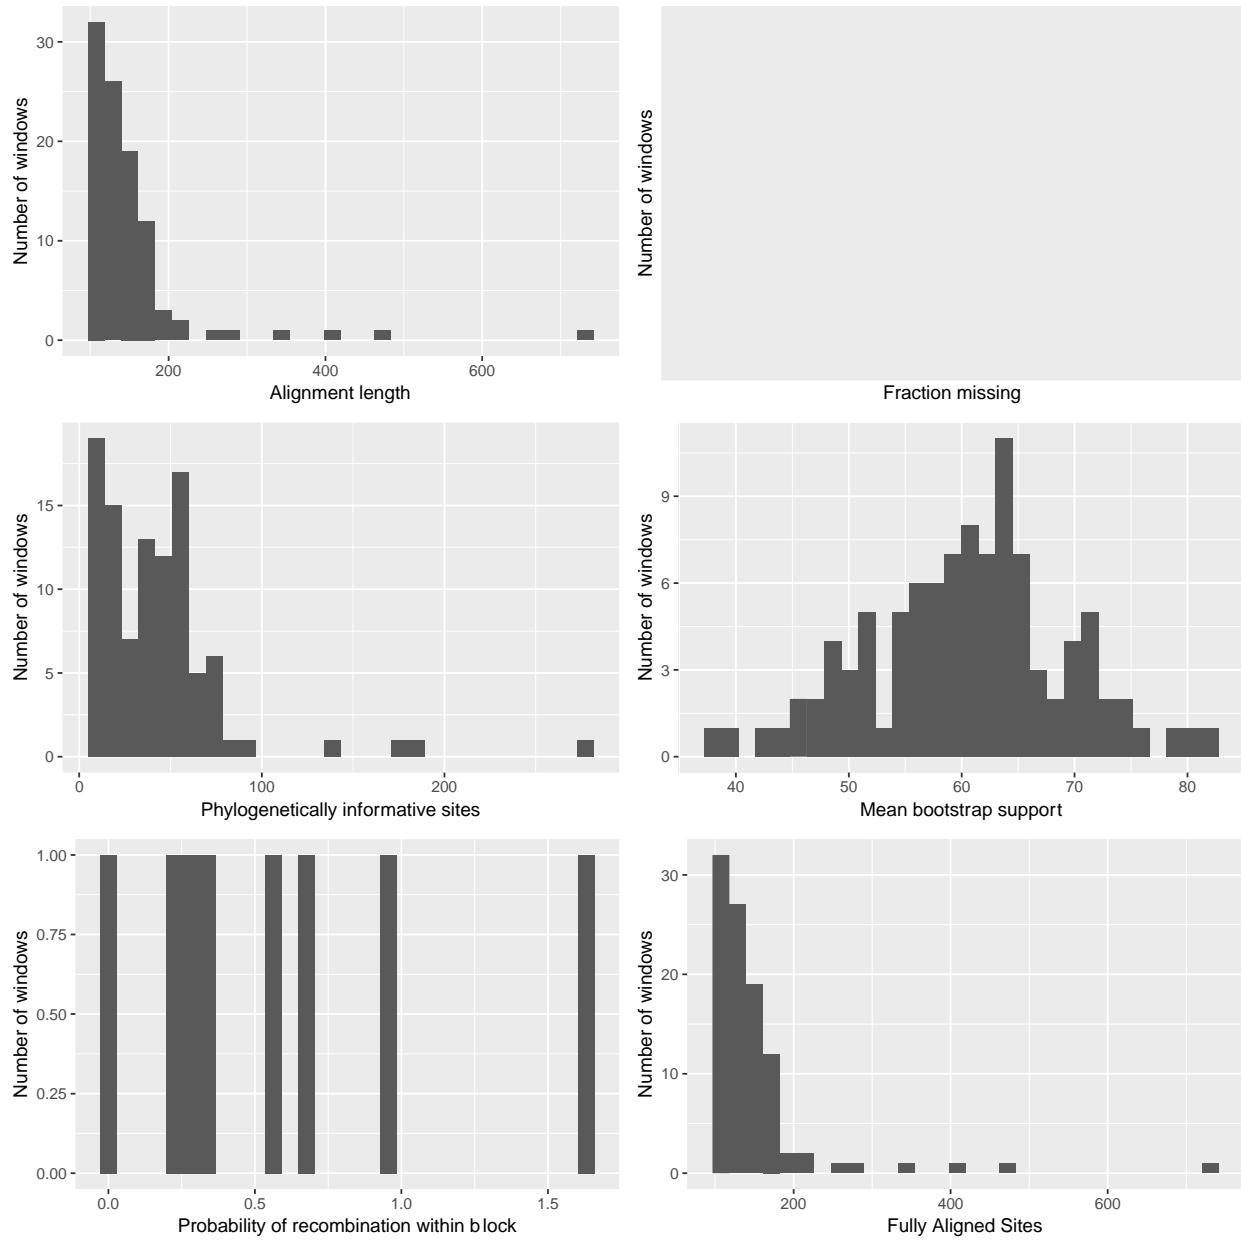

**Fig. S26 All species, non-coding block statistics**

*Basic statistics for non-coding blocks and resulting trees in the full alignment. Statistics as in Fig. S22*

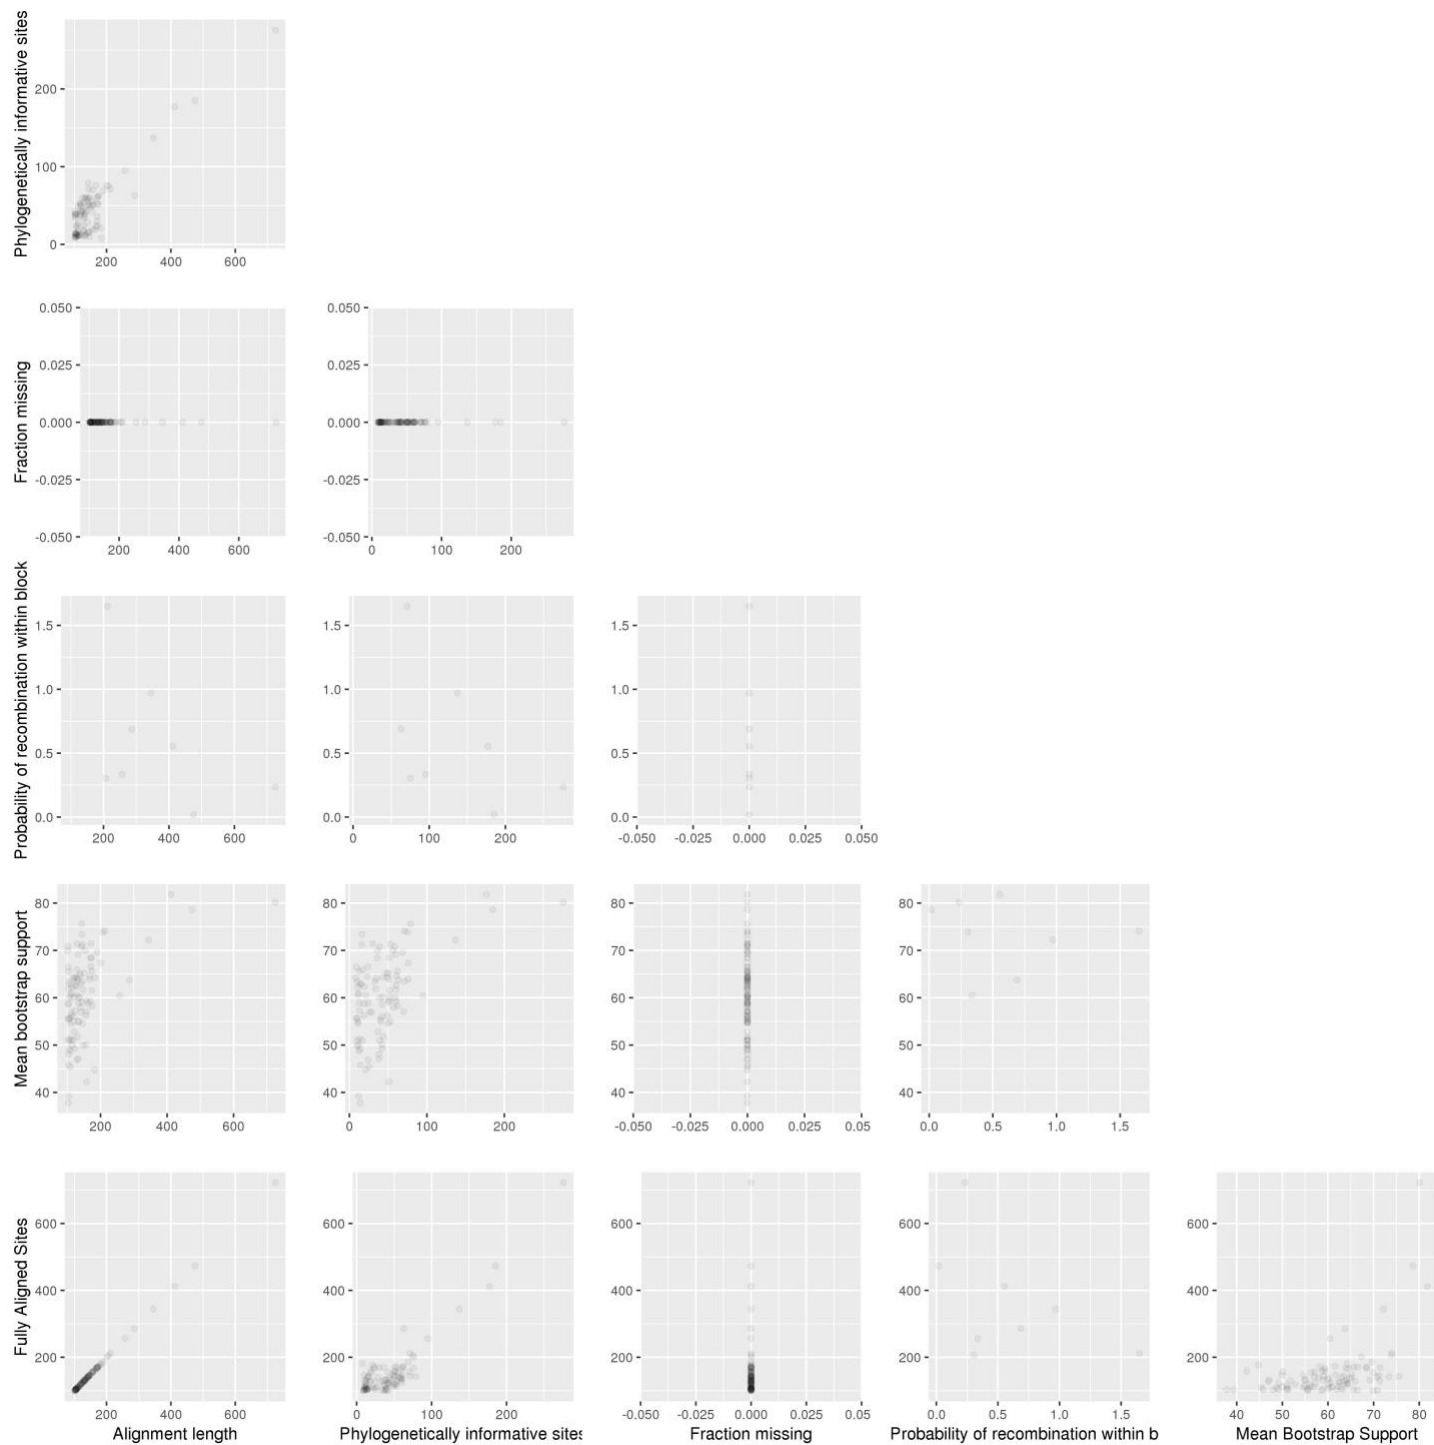

**Fig. S27 All species, noncoding blocks pairwise statistics**

*Correlations between each pair of window statistics in Fig. S26*

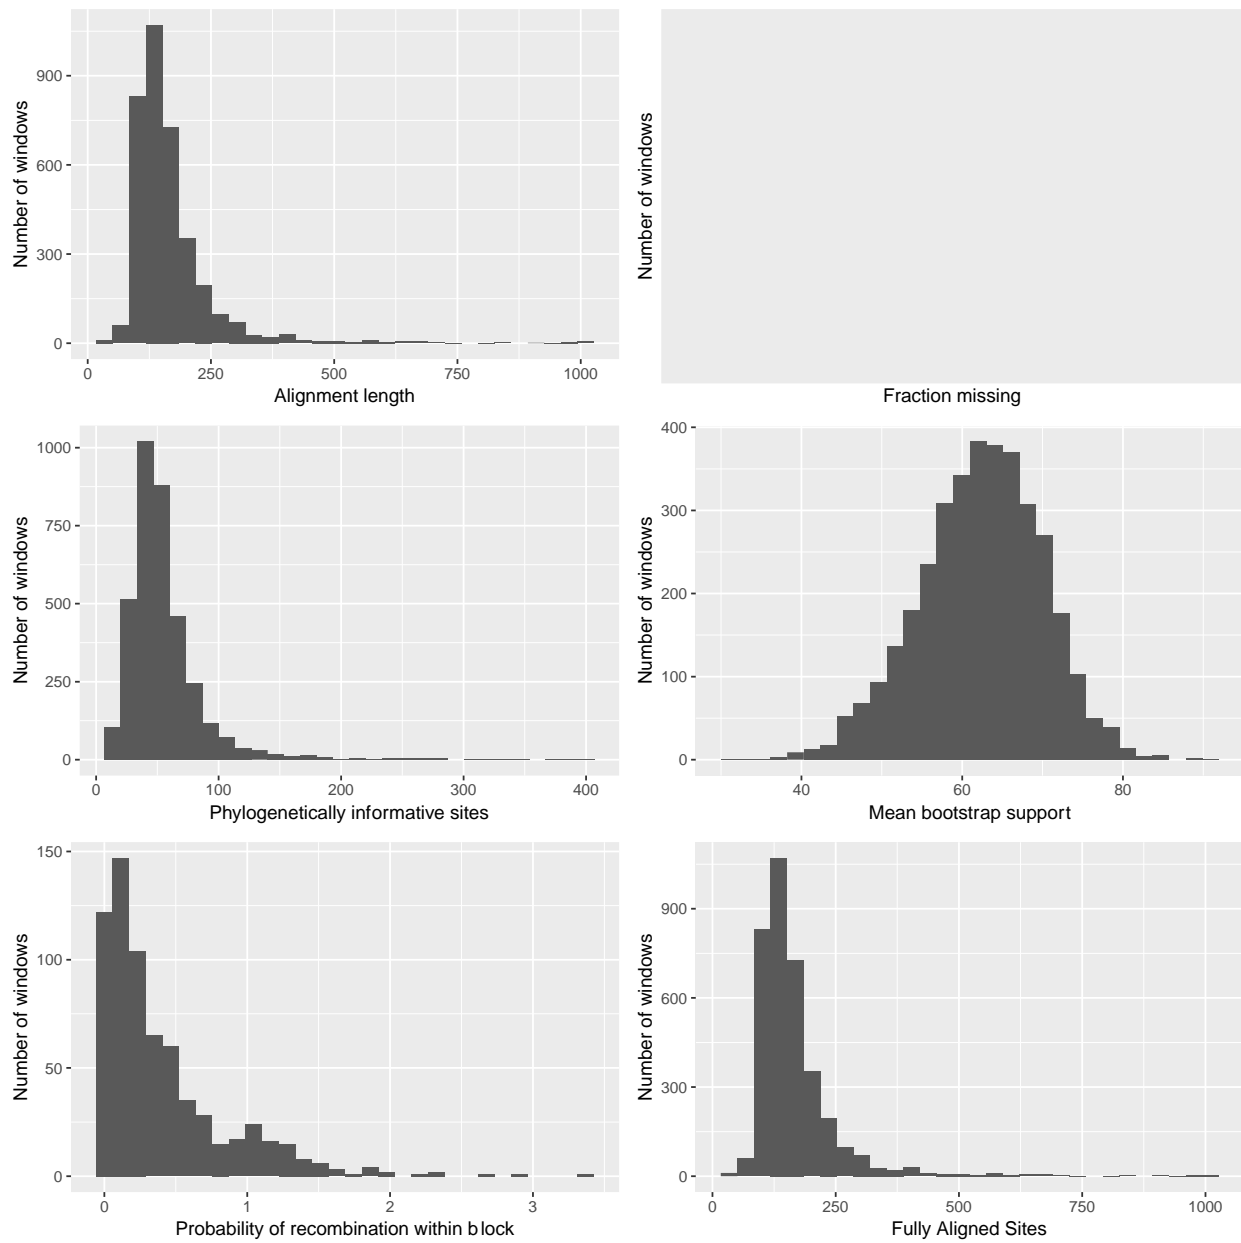

**Fig. S28 All species, coding block statistics**

*Basic statistics for coding blocks and resulting trees in the full alignment. Statistics as in Fig. S22-S24.*

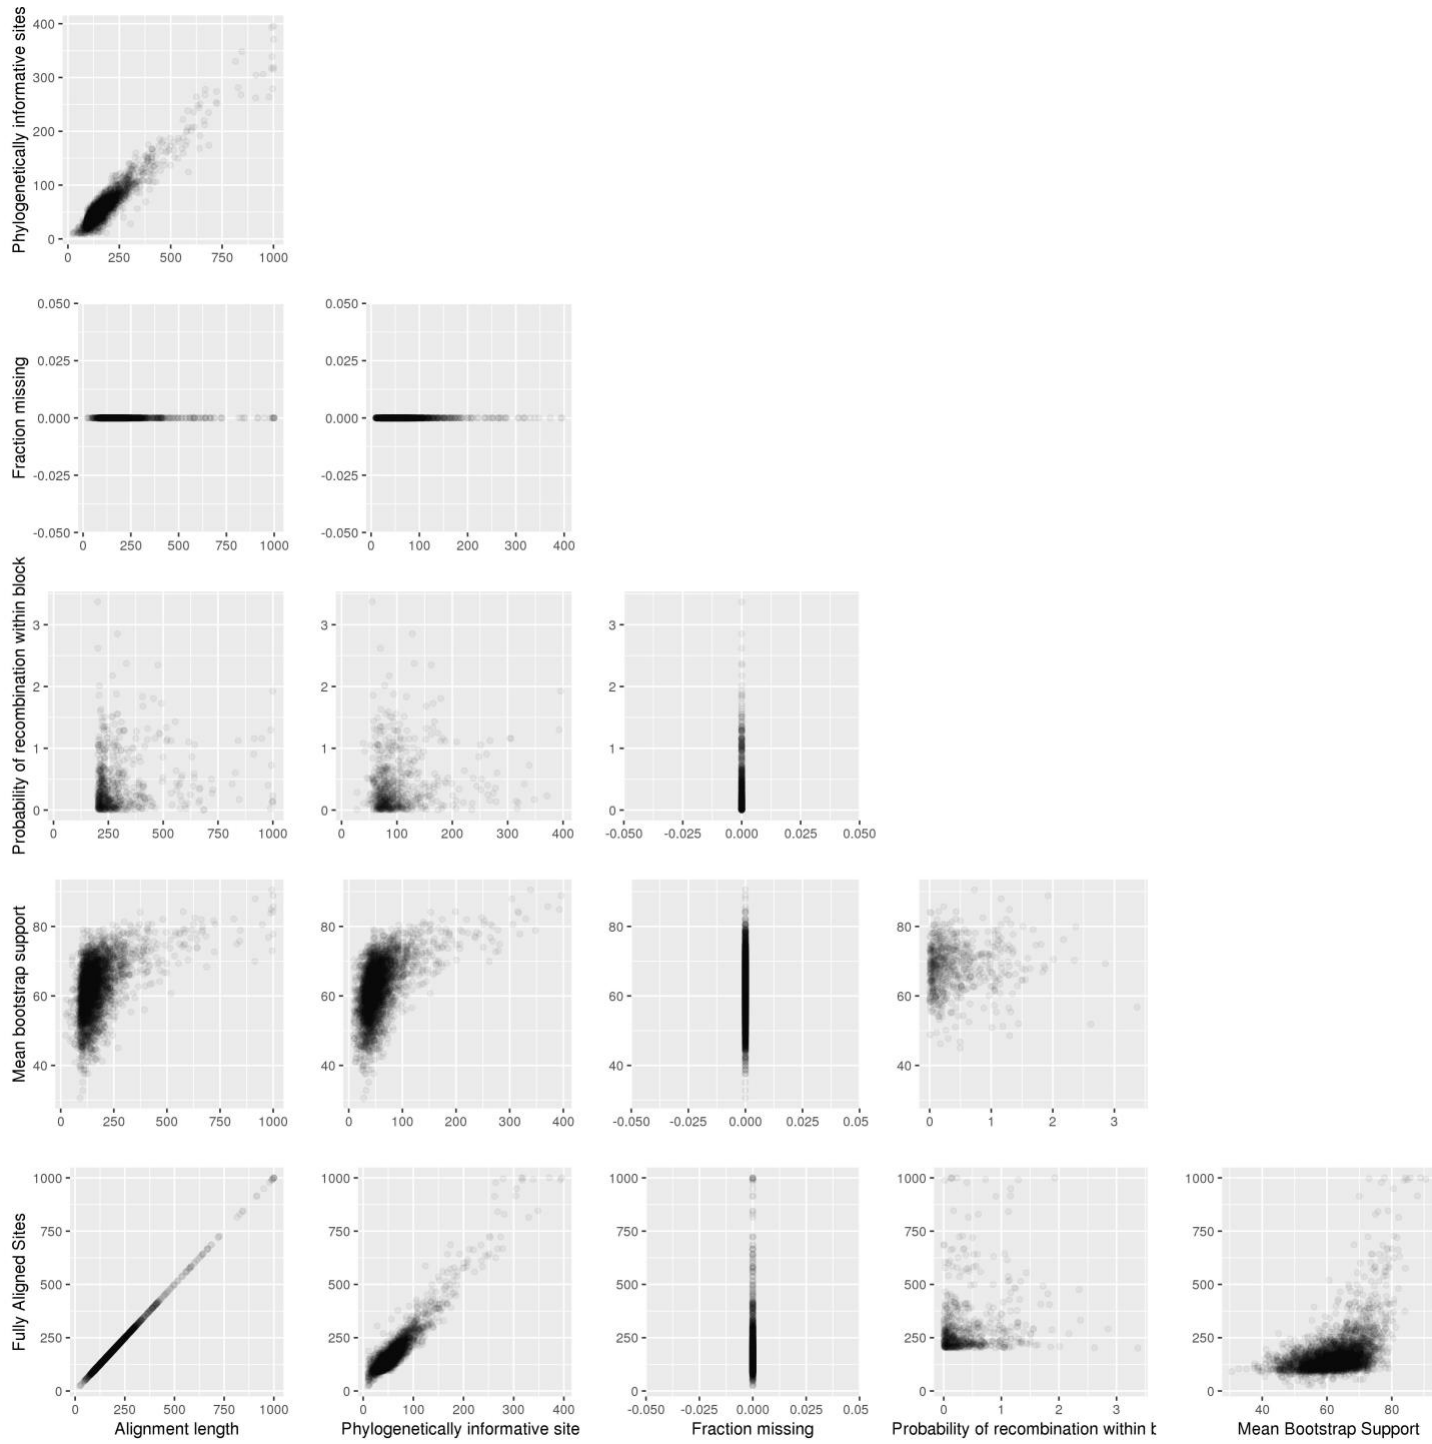

**Fig. S29 All species coding block pairwise statistics**

*Correlations between each pair of window statistics in Fig. S28*



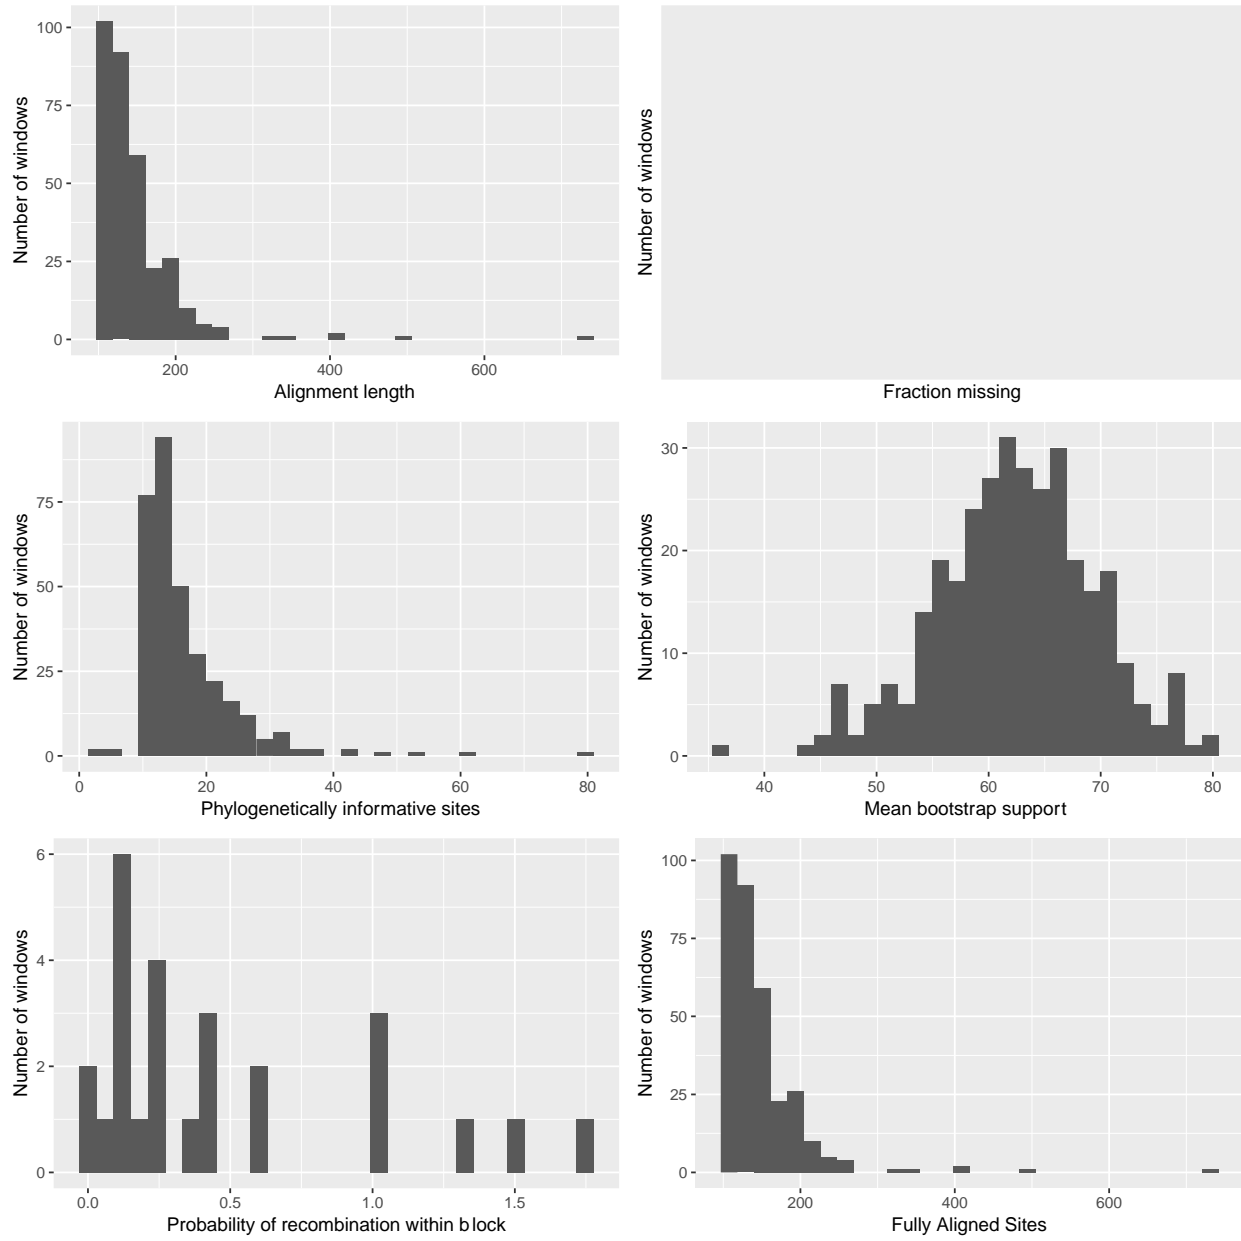

**Fig. S30 *Heliconius* species noncoding block statistics**

*Basic statistics for non-coding blocks and resulting trees in Heliconius species. Statistics as in Fig. S22*

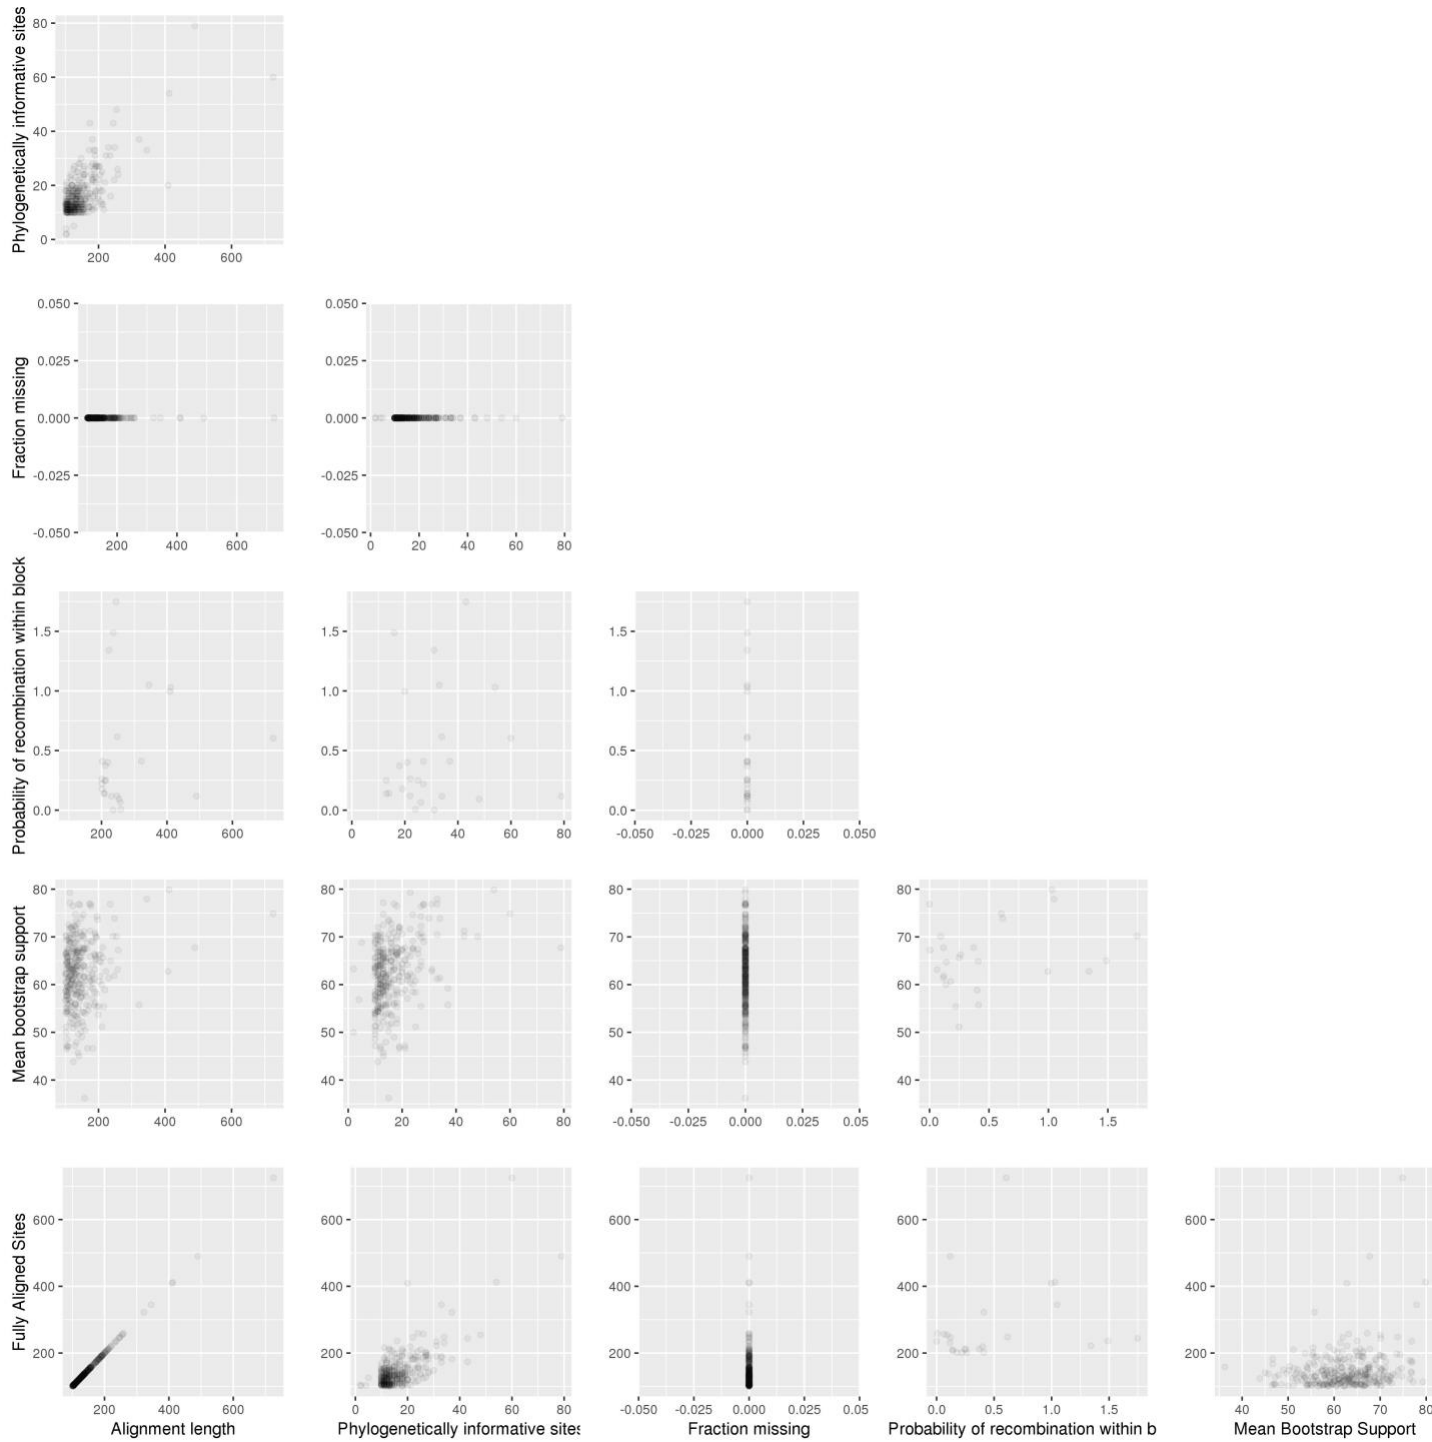

**Fig. S31 *Heliconius* species non-coding pairwise statistics**

*Correlations between each pair of window statistics in Fig. S30*

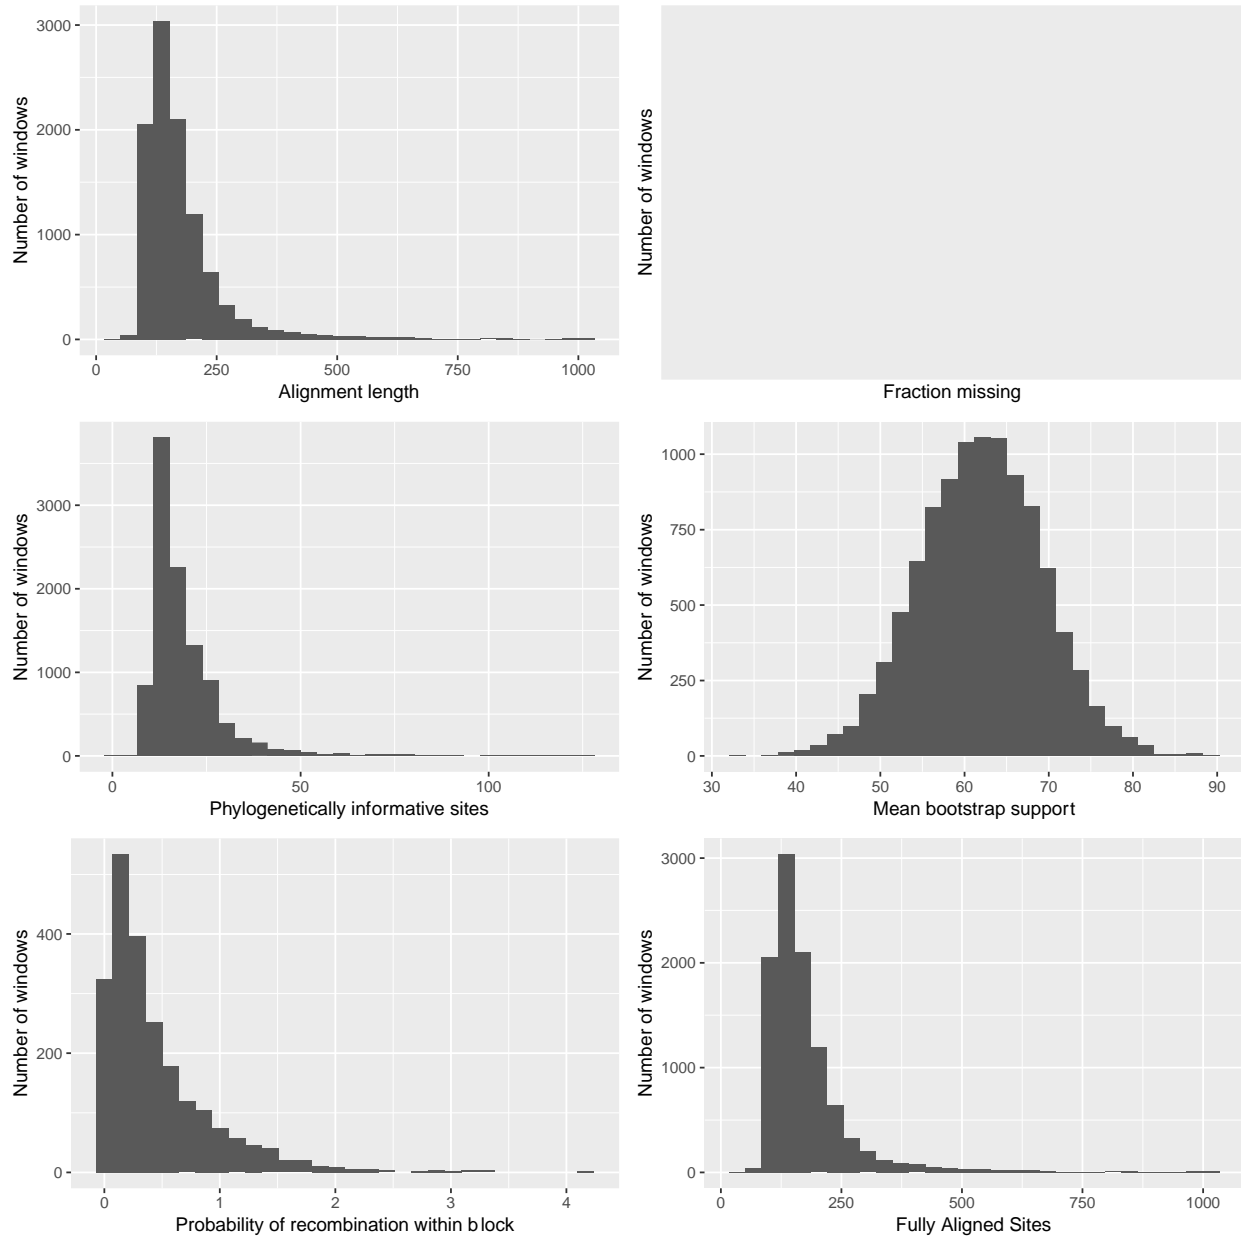

**Fig. S32 *Heliconius* coding block statistics**

*Basic statistics for coding blocks in Heliconius species and resulting trees. Statistics as in Fig. S22*

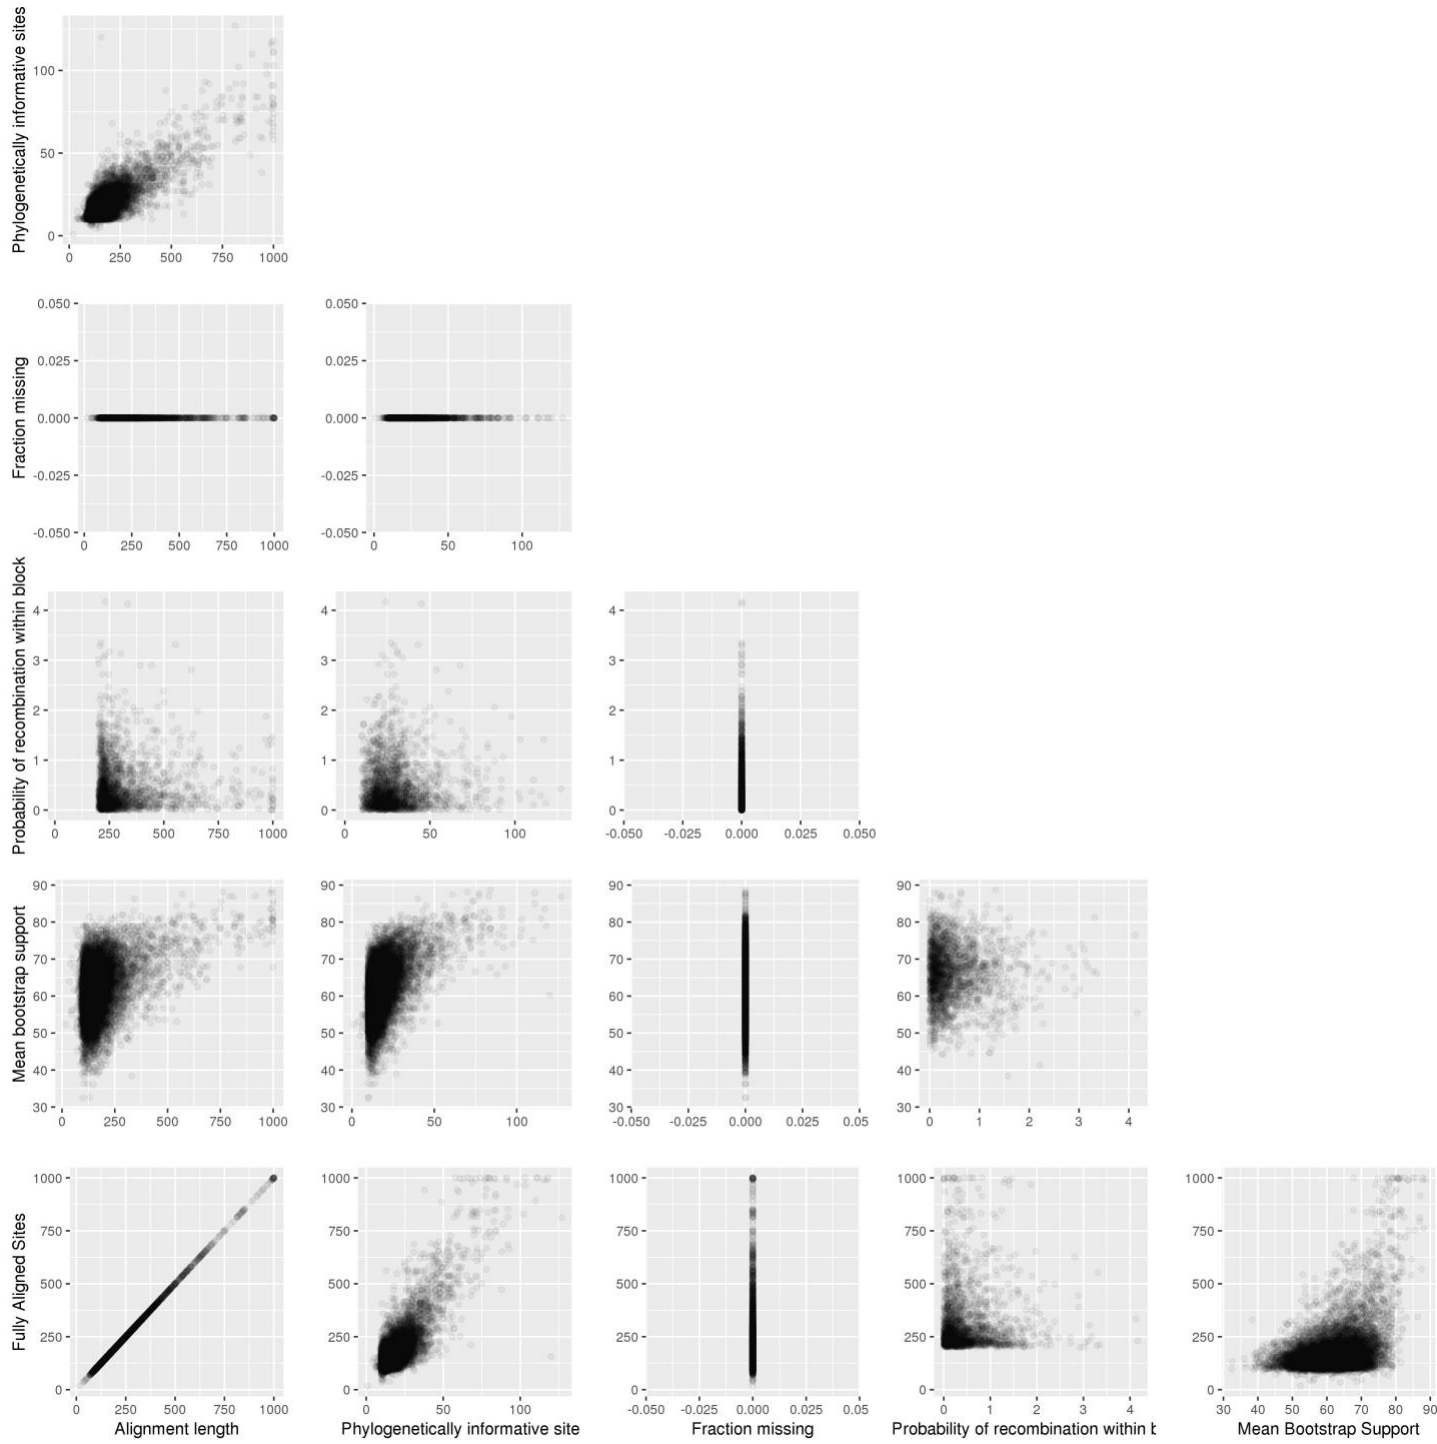

**Fig. S33 Heliconius coding block pairwise statistics**

*Correlations between each pair of window statistics in Fig. S32*

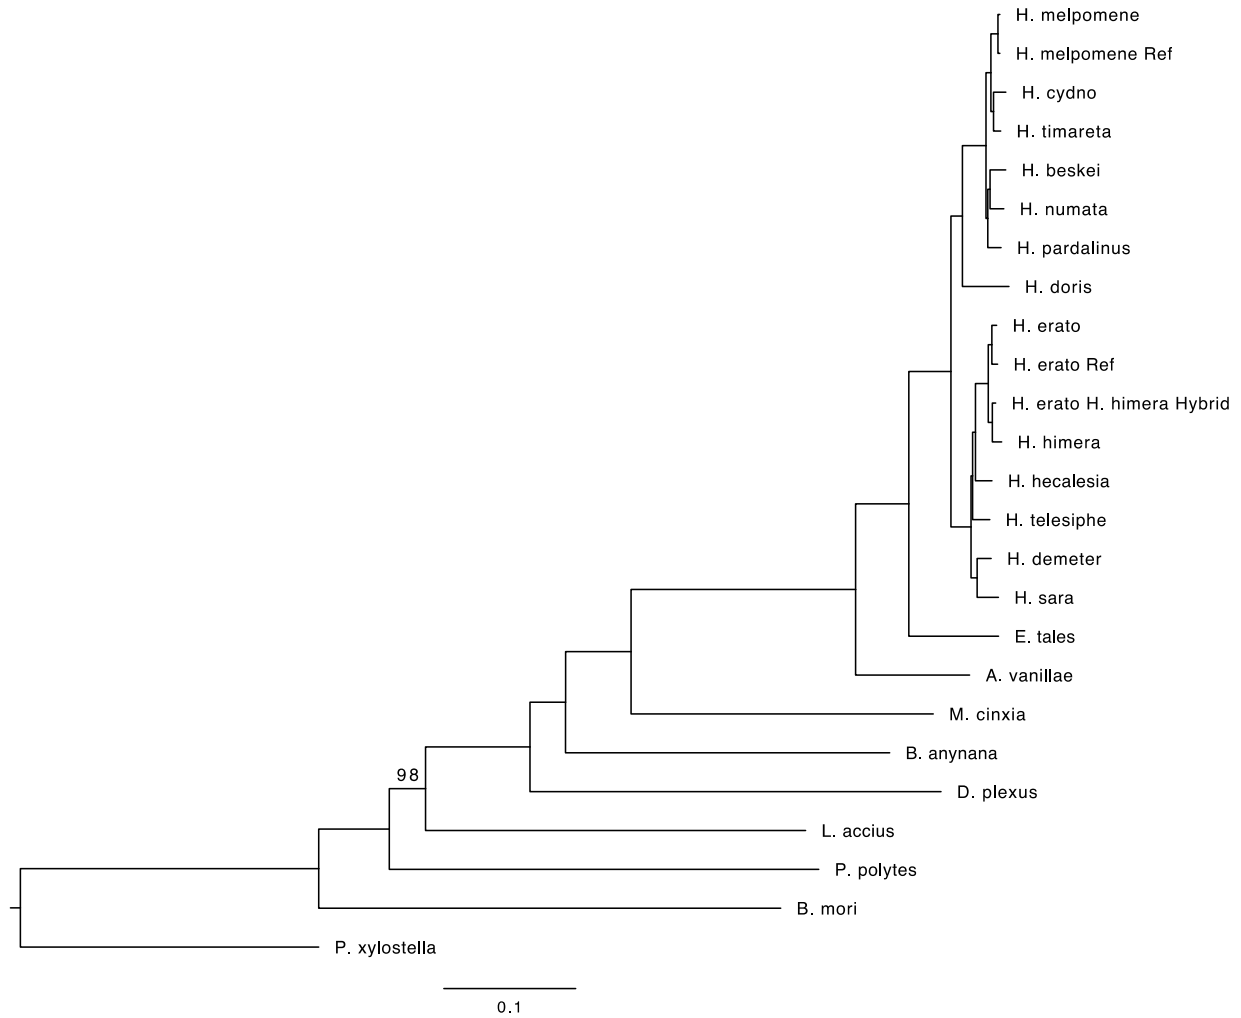

**Fig. S34 Maximum likelihood concatenated tree for genes generated in IQtree.**

*Bootstrap support values are shown for nodes with less than 100% support. The scale bar represents branch lengths, which correspond to the mean number of substitutions per site in the alignment.*

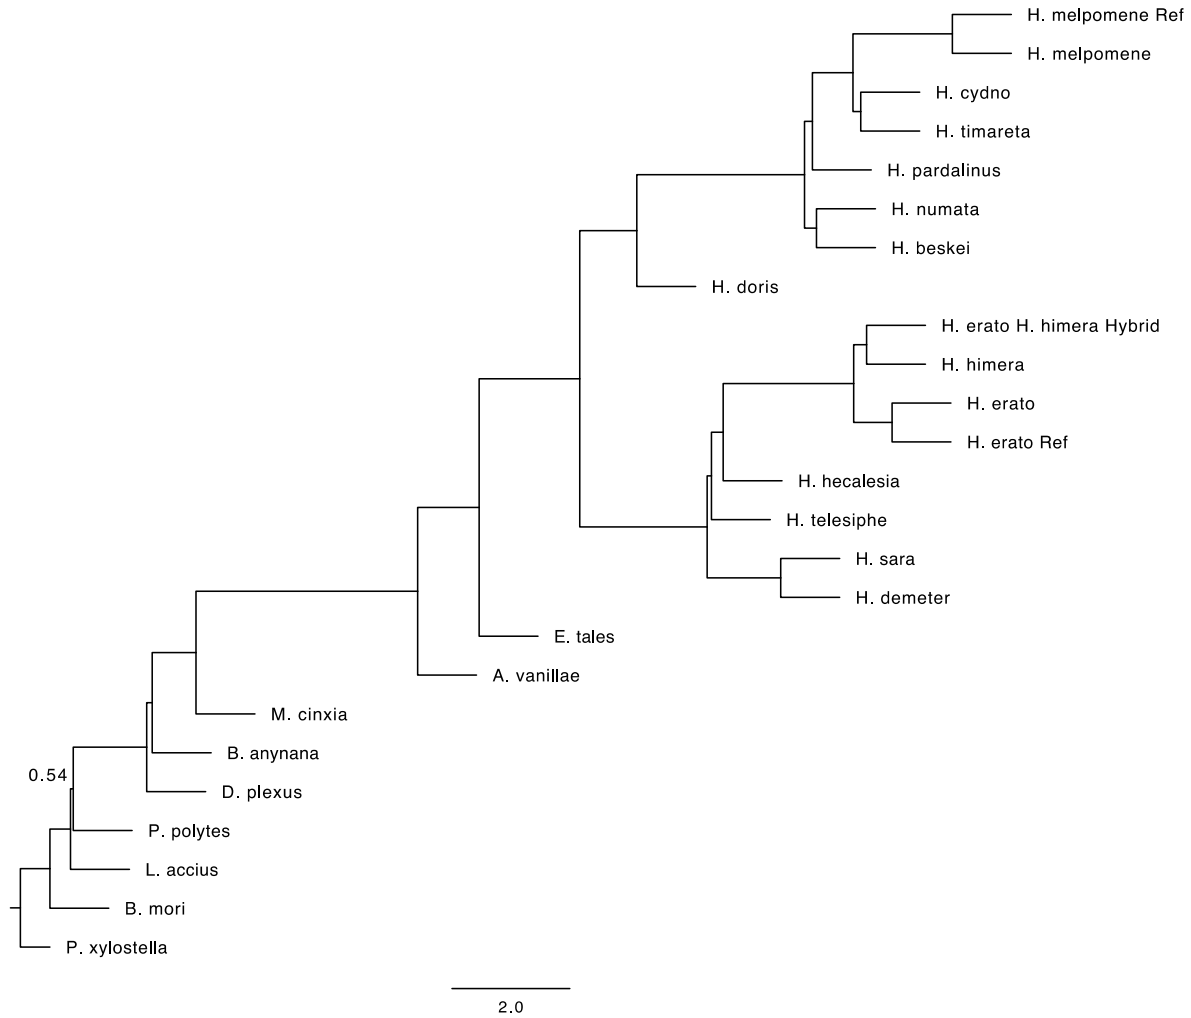

**Fig. S35 ASTRAL tree for genes. Species tree generated in ASTRAL for gene alignments.**

*ASTRAL support values for each node are 1.0. The scale bar represents branch lengths, which correspond to coalescent units.*

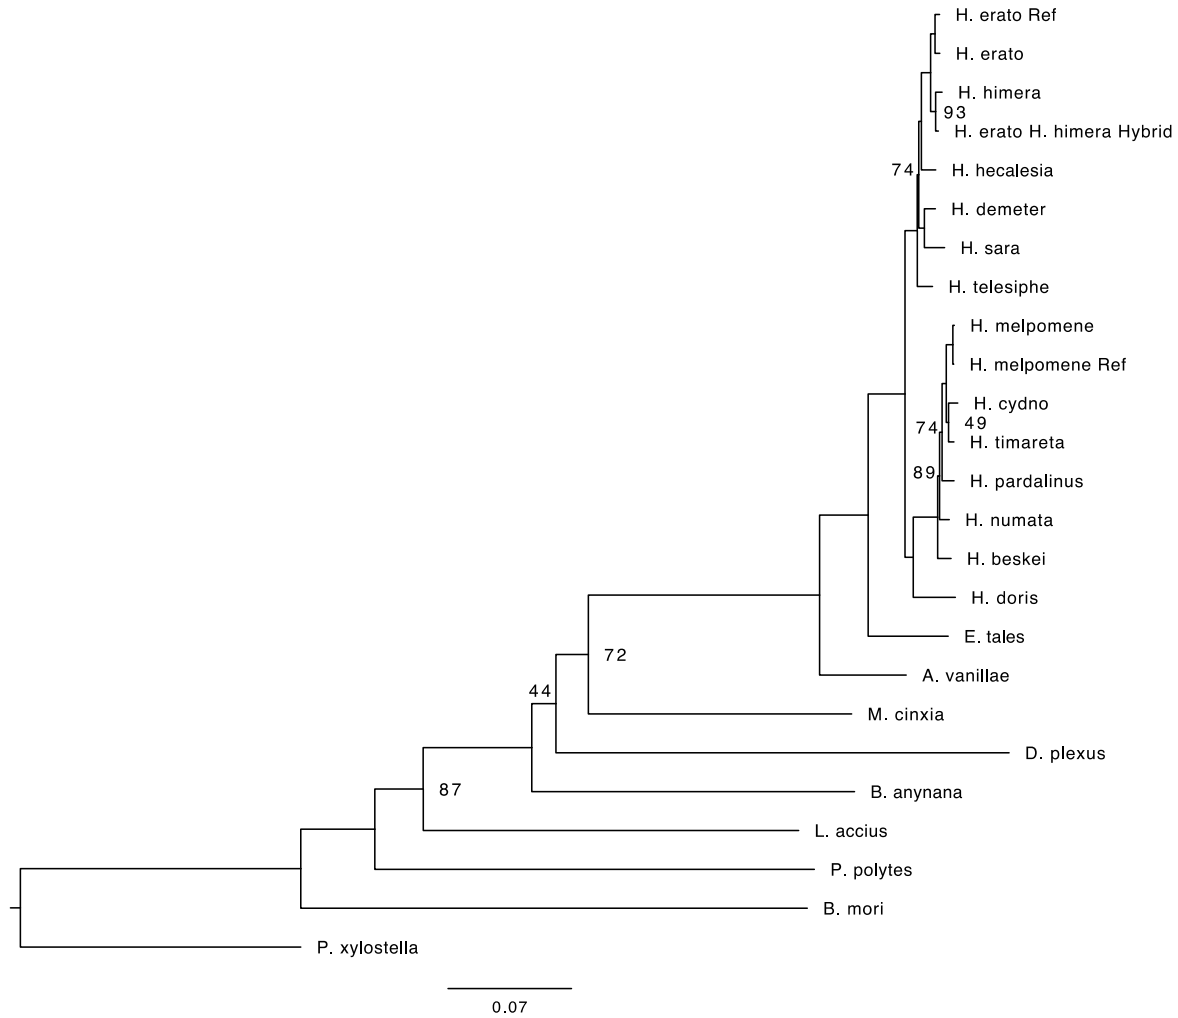

**Fig. S36 Concatenated tree for noncoding, fully aligned blocks greater than or equal to 100 bp.**

*Bootstrap support values are shown for nodes with less than 100% support. The scale bar represents branch lengths, which correspond to the mean number of substitutions per site in the alignment.*

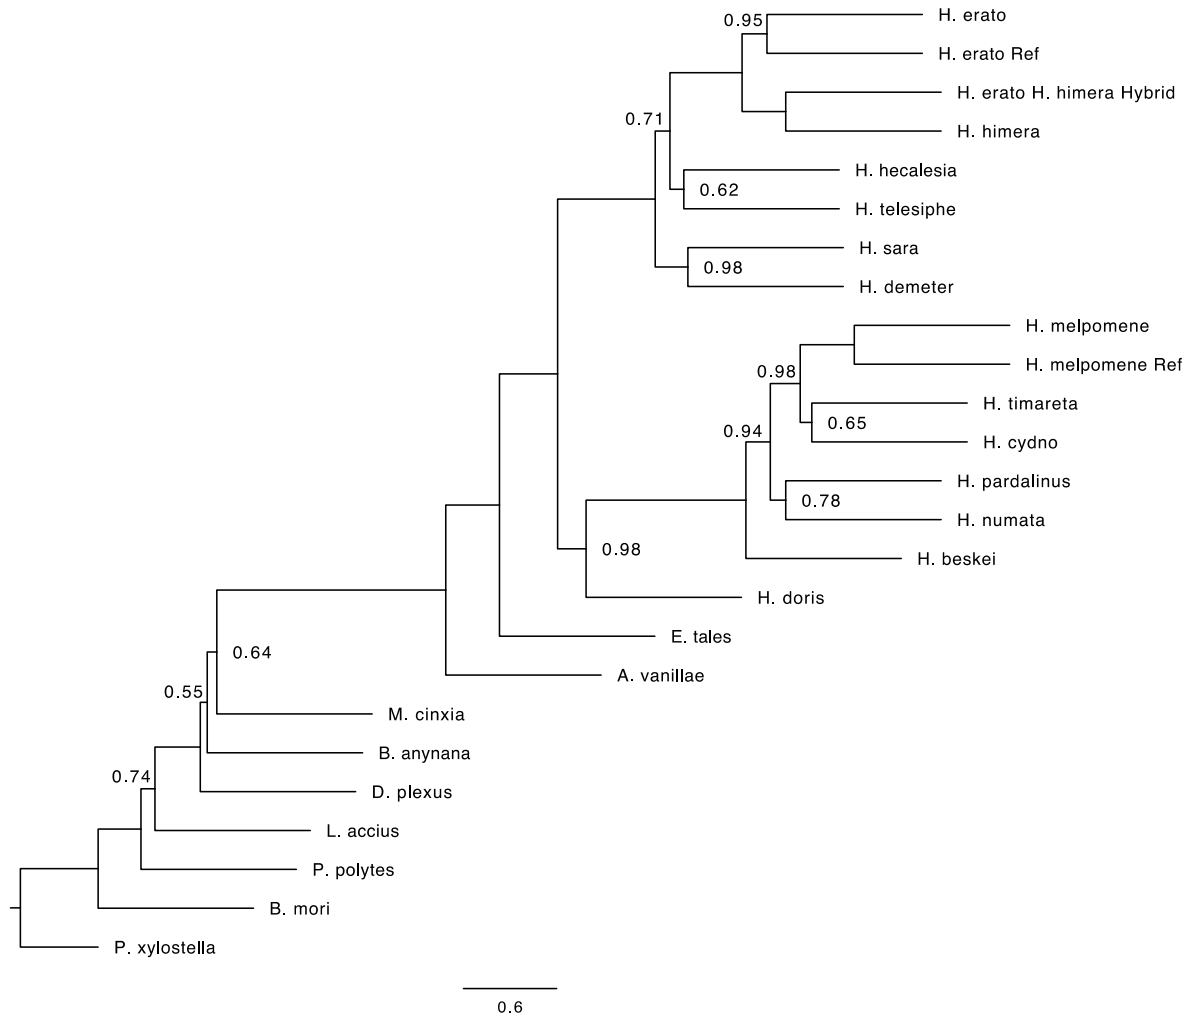

**Fig. S37 ASTRAL tree for noncoding, fully aligned blocks greater than or equal to 100 bp.**

*Astral support values are shown for nodes with less than 1.0 support. Branch lengths in coalescent units.*



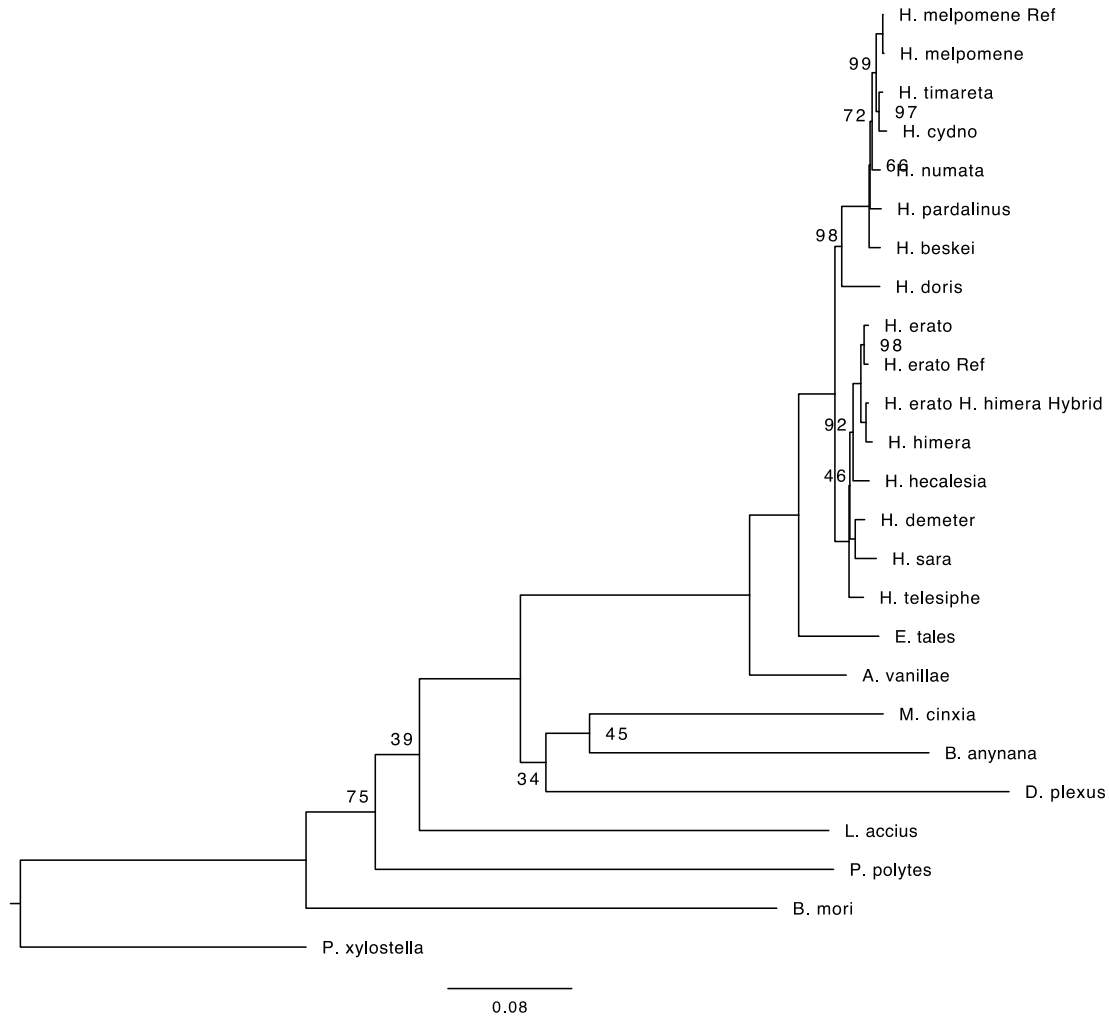

**Fig. S38 Concatenated tree for noncoding, fully aligned blocks greater than or equal to 150 bp.**

*Bootstrap support values are shown for nodes with less than 100% support. The scale bar represents branch lengths, which correspond to the mean number of substitutions per site in the alignment.*

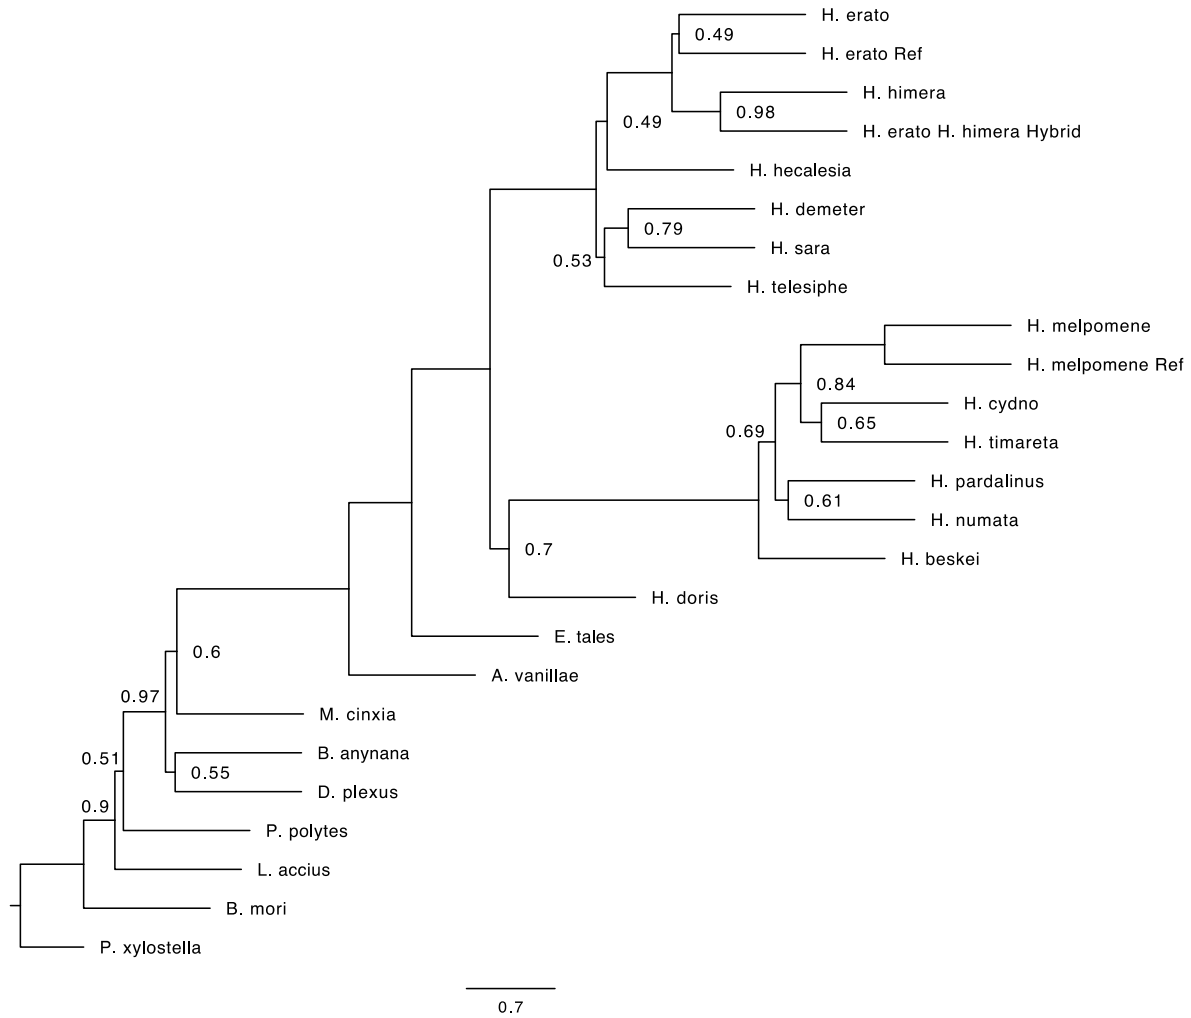

**Fig. S39 ASTRAL tree for noncoding, fully aligned blocks greater than or equal to 150 bp.**

*Astral support values are shown for nodes with less than 1.0 support. Branch lengths in coalescent units.*

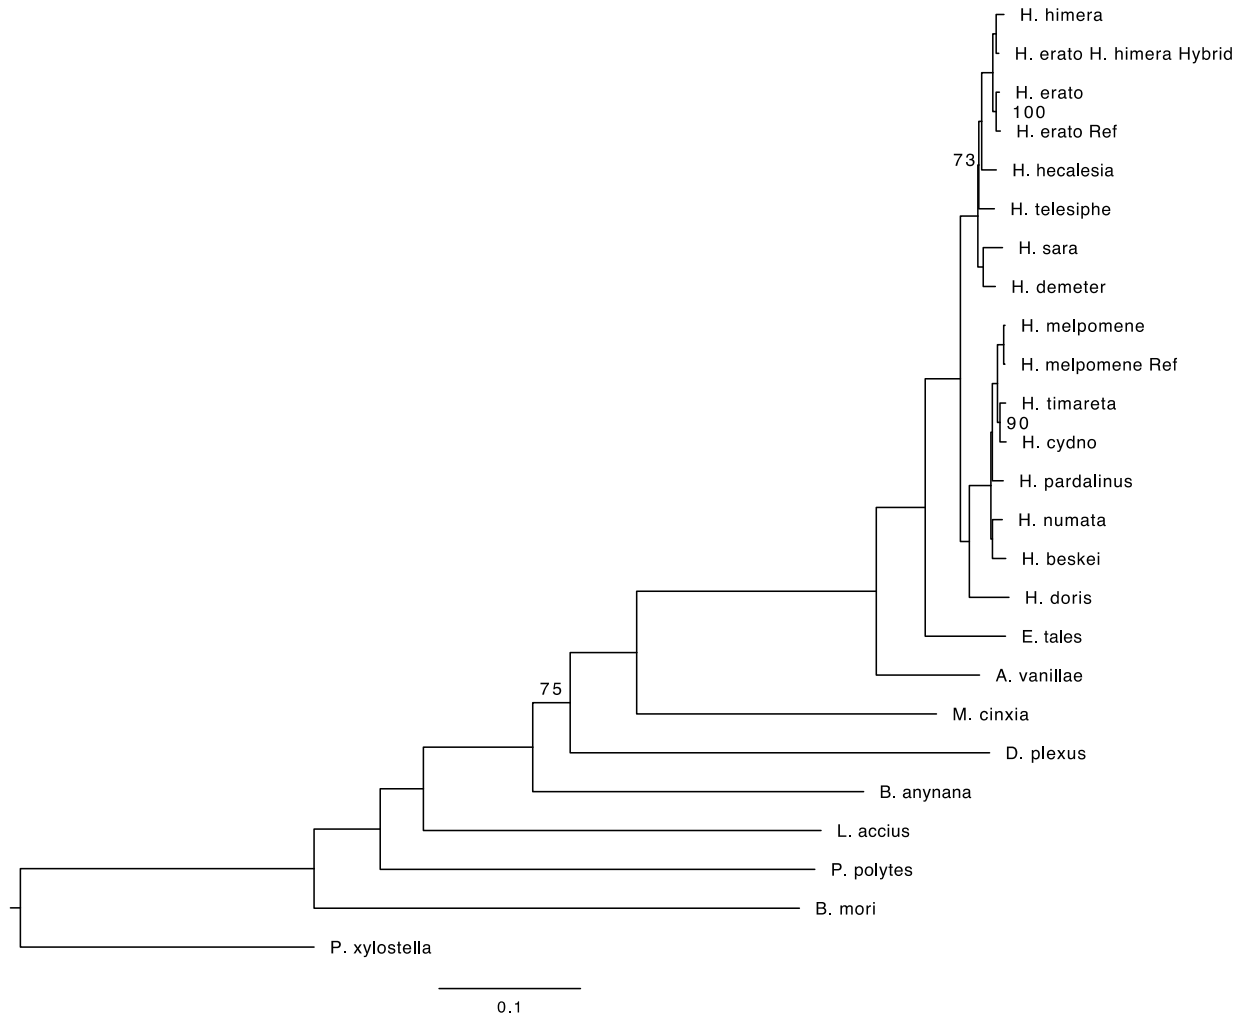

**Fig. S40 Concatenated tree for coding, fully aligned blocks greater than or equal to 100 bp.**

*Bootstrap support values are shown for nodes with less than 100% support. The scale bar represents branch lengths, which correspond to the mean number of substitutions per site in the alignment.*

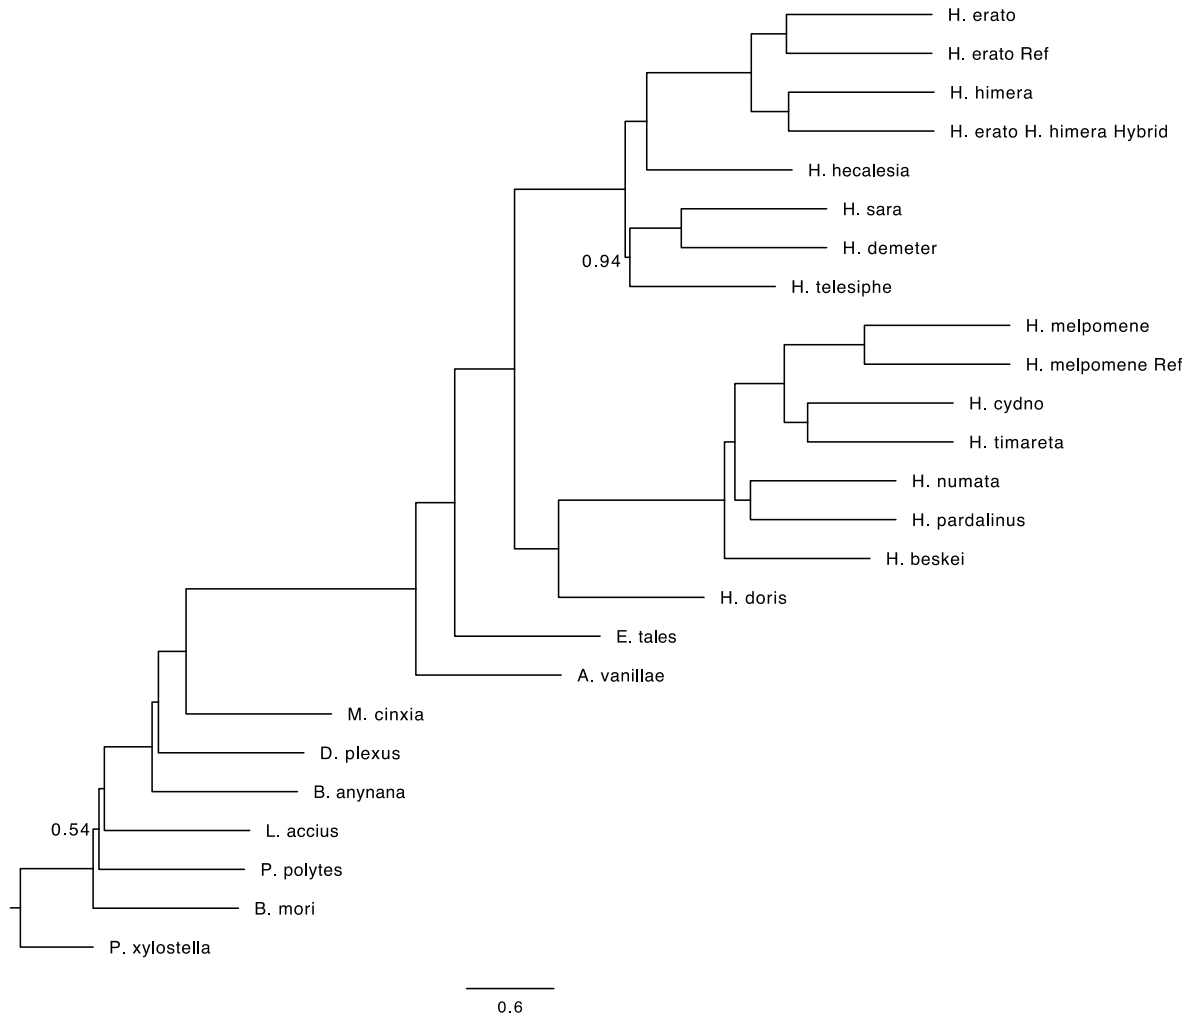

**Fig. S41 ASTRAL tree for coding, fully aligned blocks greater than or equal to 100 bp.**

*Astral support values are shown for nodes with less than 1.0 support. Branch lengths in coalescent units.*

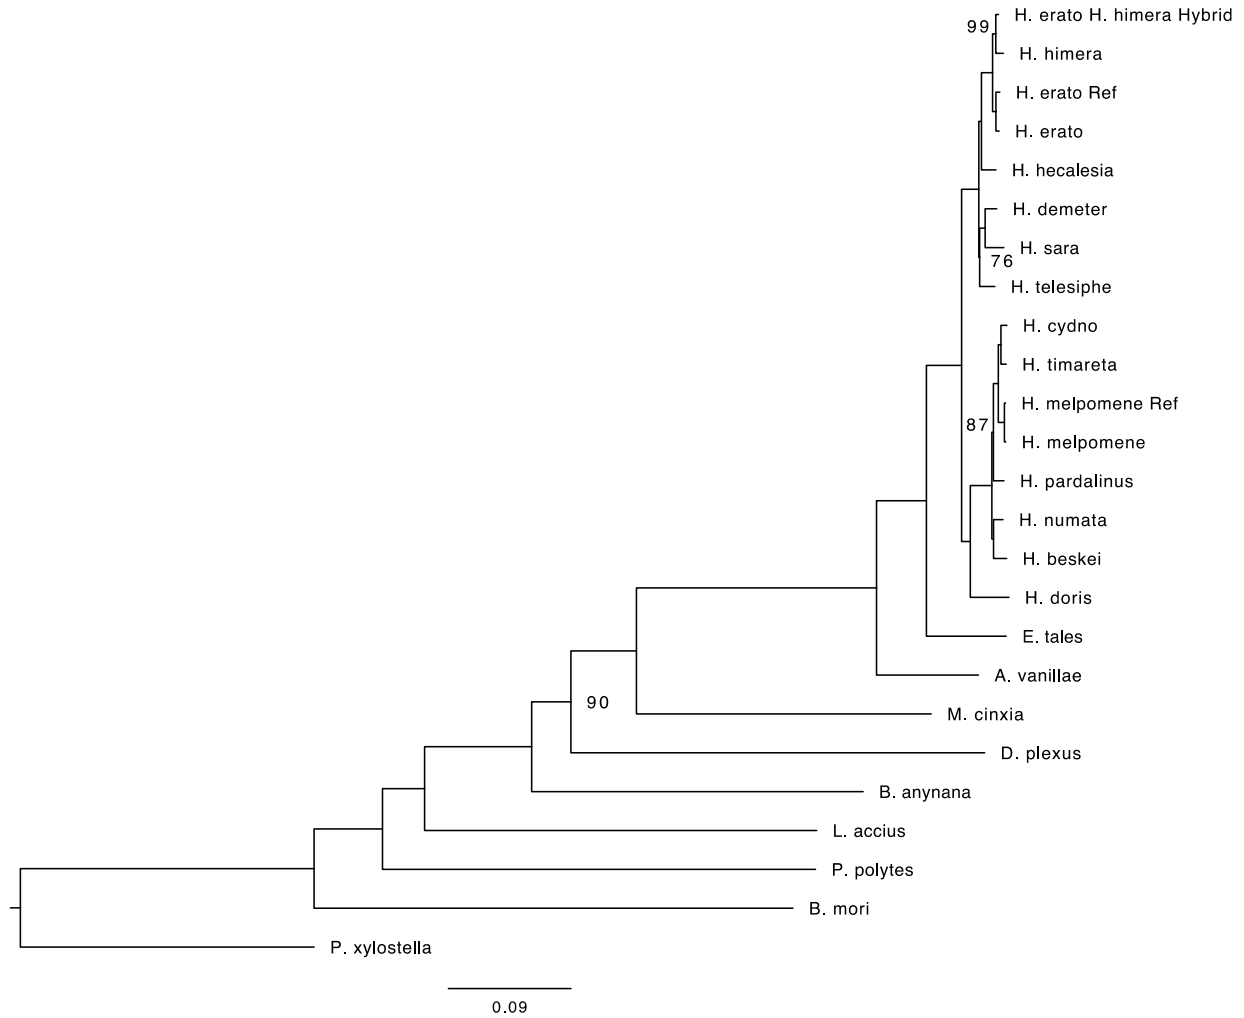

**Fig. S42 Concatenated tree for coding, fully aligned blocks greater than or equal to 150 bp.**

*Bootstrap support values are shown for nodes with less than 100% support. The scale bar represents branch lengths, which correspond to the mean number of substitutions per site in the alignment.*

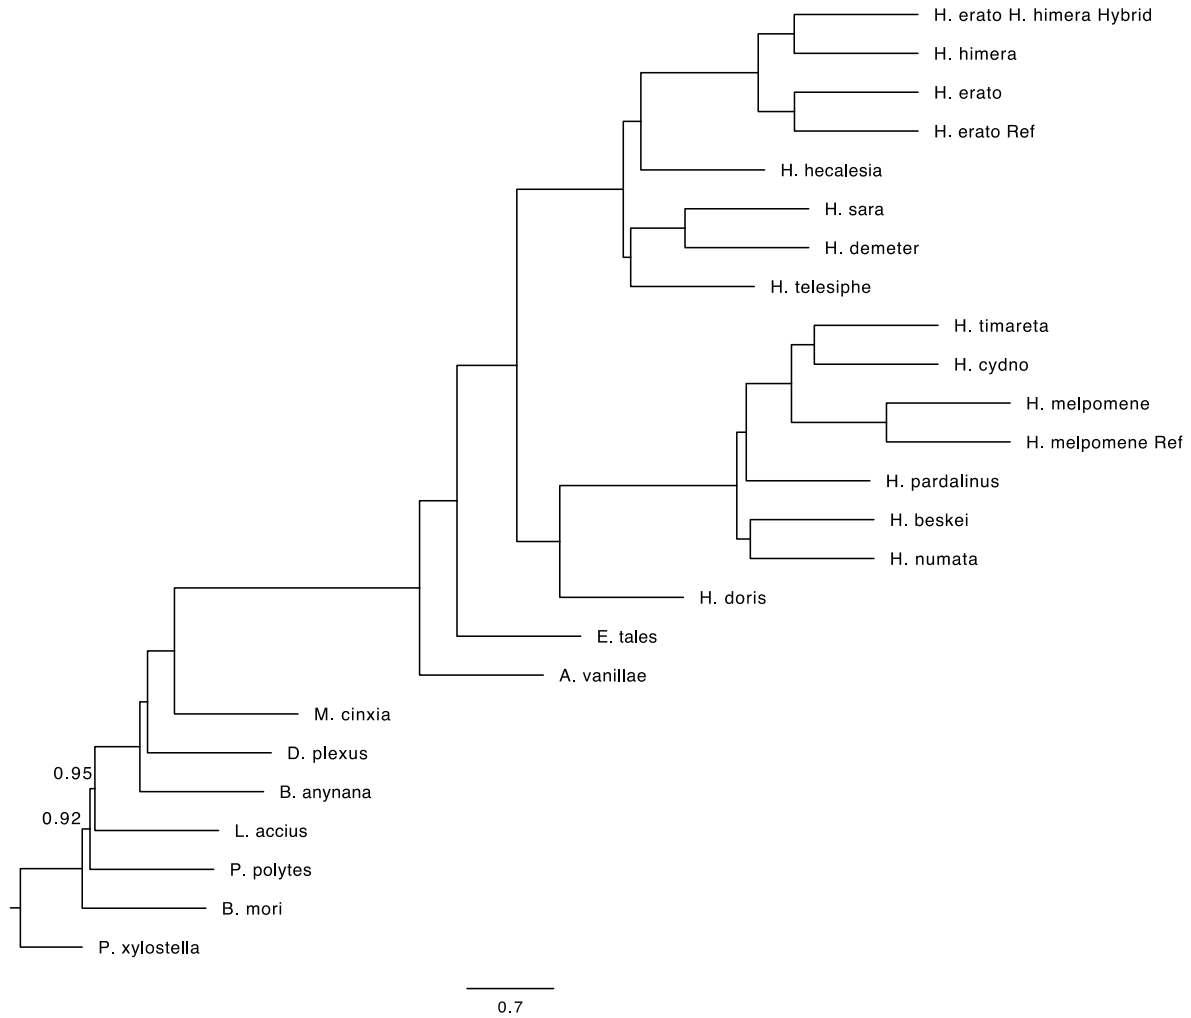

**Fig. S43 ASTRAL tree for coding, fully aligned blocks greater than or equal to 150 bp.**

*Astral support values are shown for nodes with less than 1.0 support. Branch lengths in coalescent units.*

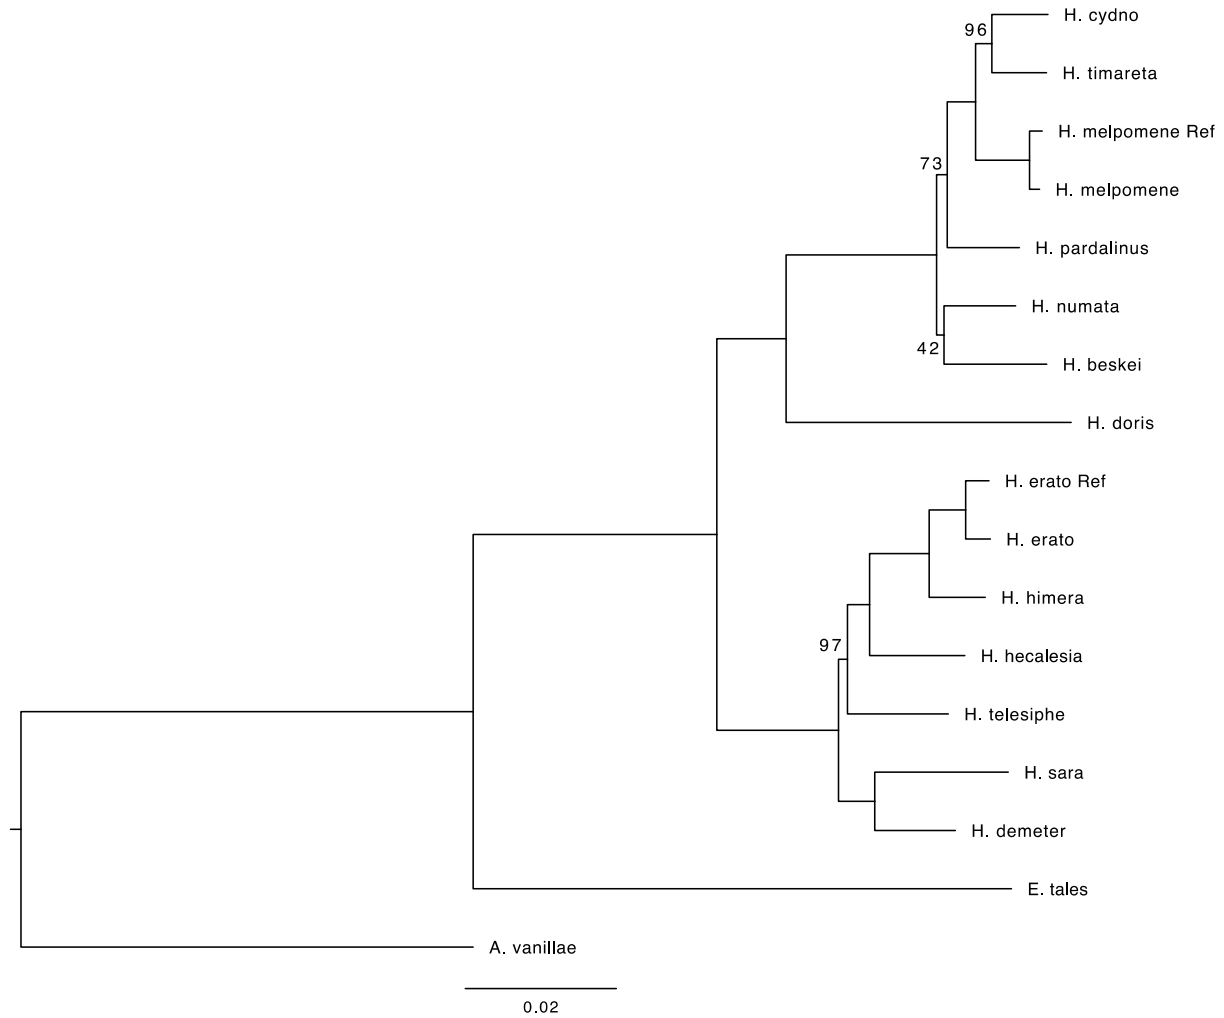

**Fig. S44 Concatenated tree for noncoding, fully aligned blocks among Heliconiini that are greater than or equal to 100 bp.**

*Bootstrap support values are shown for nodes with less than 100% support. The scale bar represents branch lengths, which correspond to the mean number of substitutions per site in the alignment.*

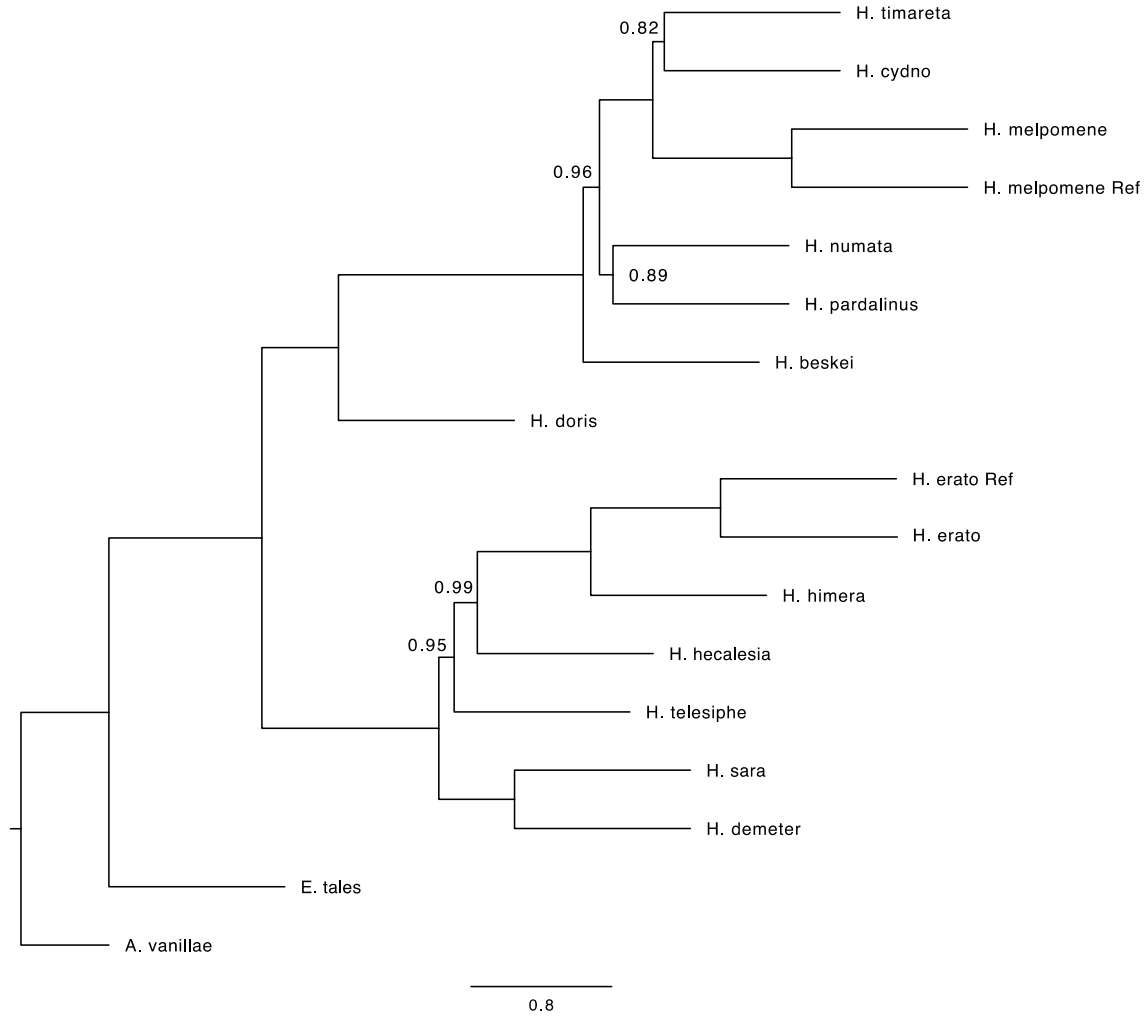

**Fig. S45 ASTRAL tree for noncoding, fully aligned blocks among Heliconiini that are greater than or equal to 100 bp.**

*Astral support values are shown for nodes with less than 1.0 support. Branch lengths in coalescent units.*



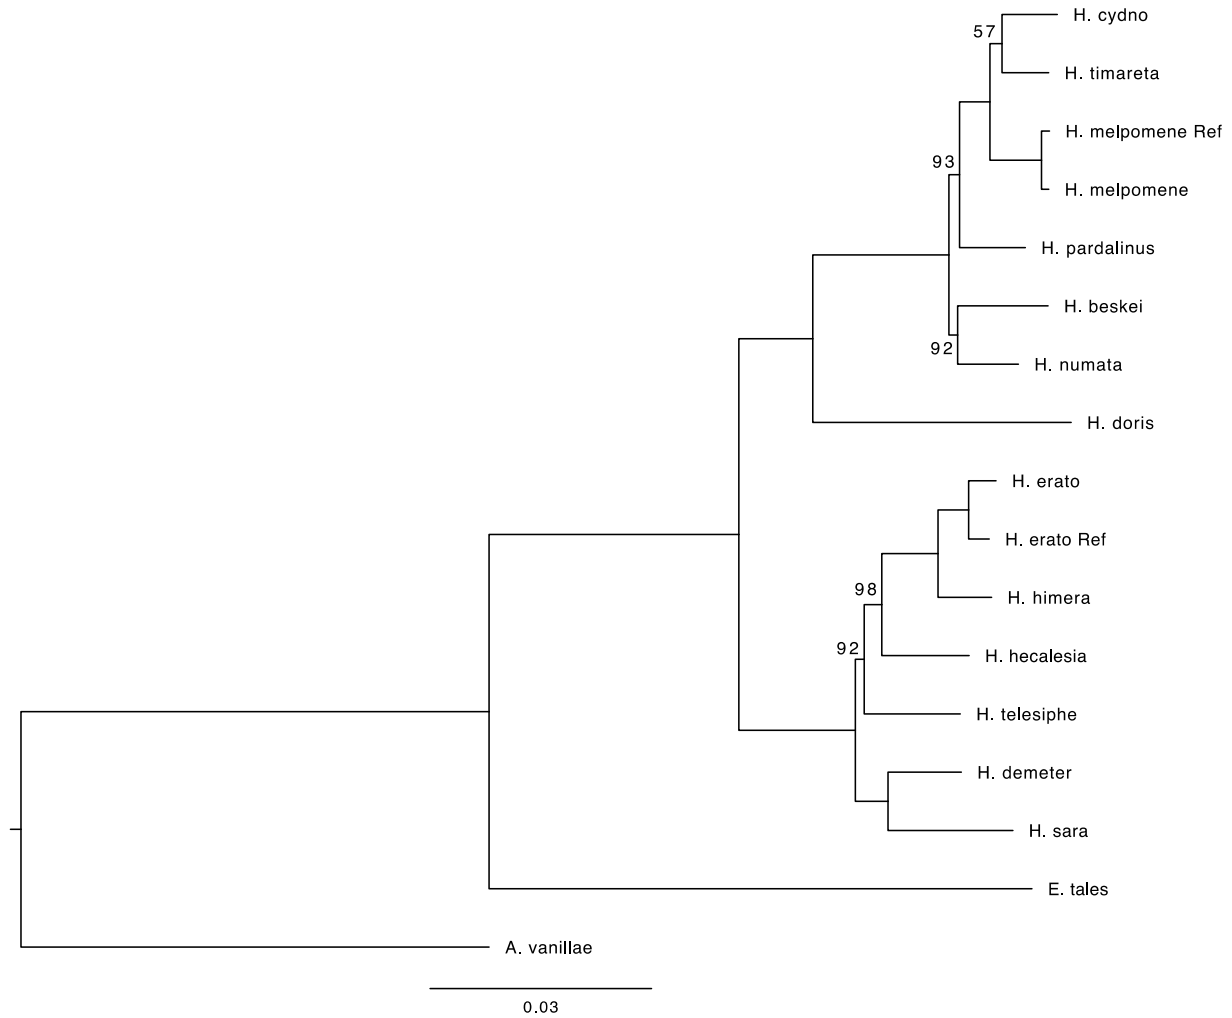

**Fig. S46 Concatenated tree for noncoding, fully aligned blocks among Heliconiini that are greater than or equal to 150 bp.**

*Bootstrap support values are shown for nodes with less than 100% support. The scale bar represents branch lengths, which correspond to the mean number of substitutions per site in the alignment.*

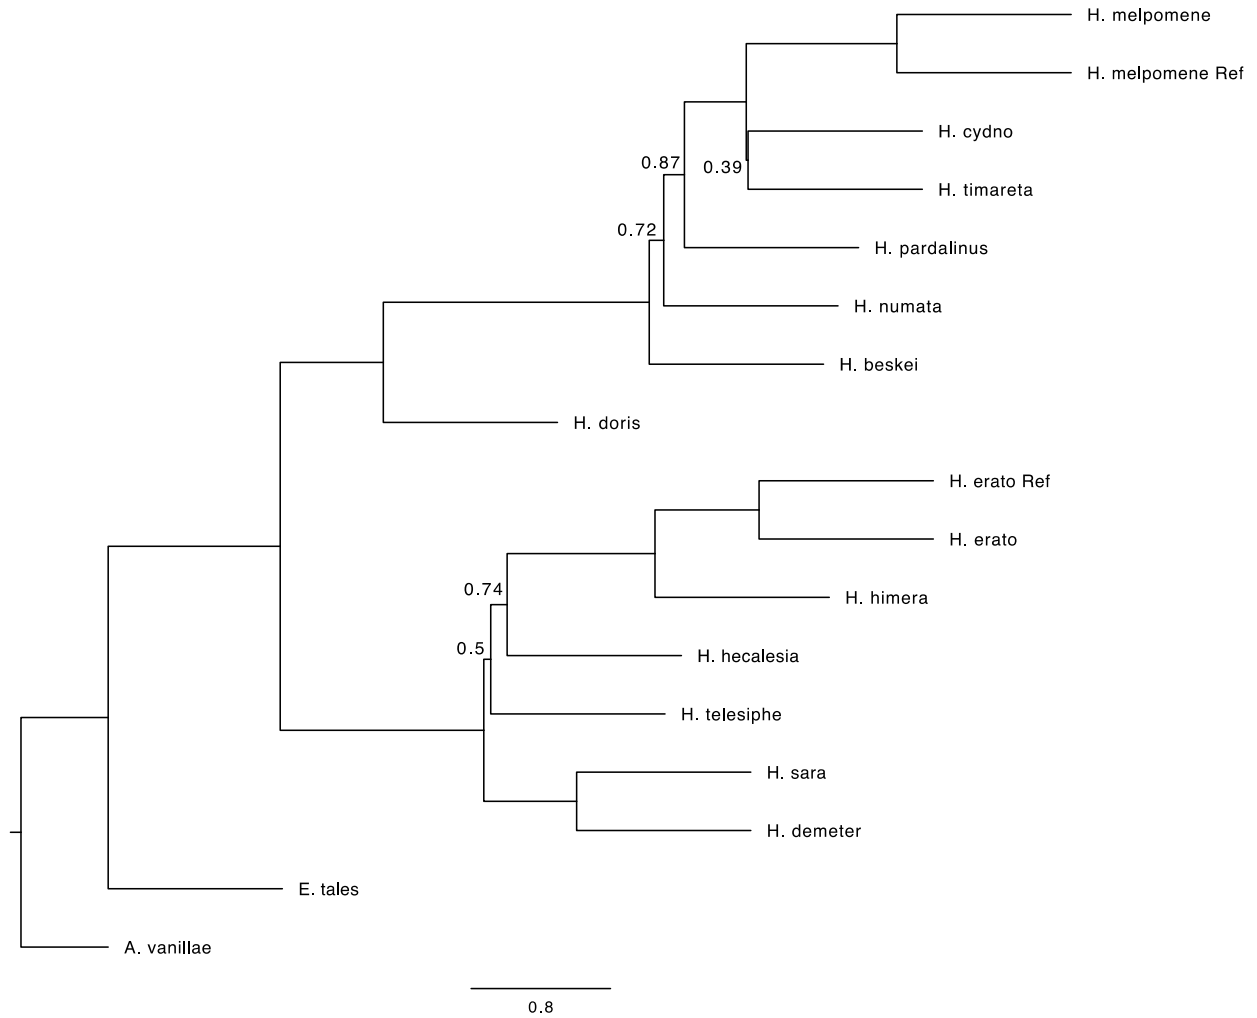

**Fig. S47 ASTRAL tree for noncoding, fully aligned blocks among Heliconiini that are greater than or equal to 150 bp.**

*Astral support values are shown for nodes with less than 1.0 support. Branch lengths in coalescent units.*

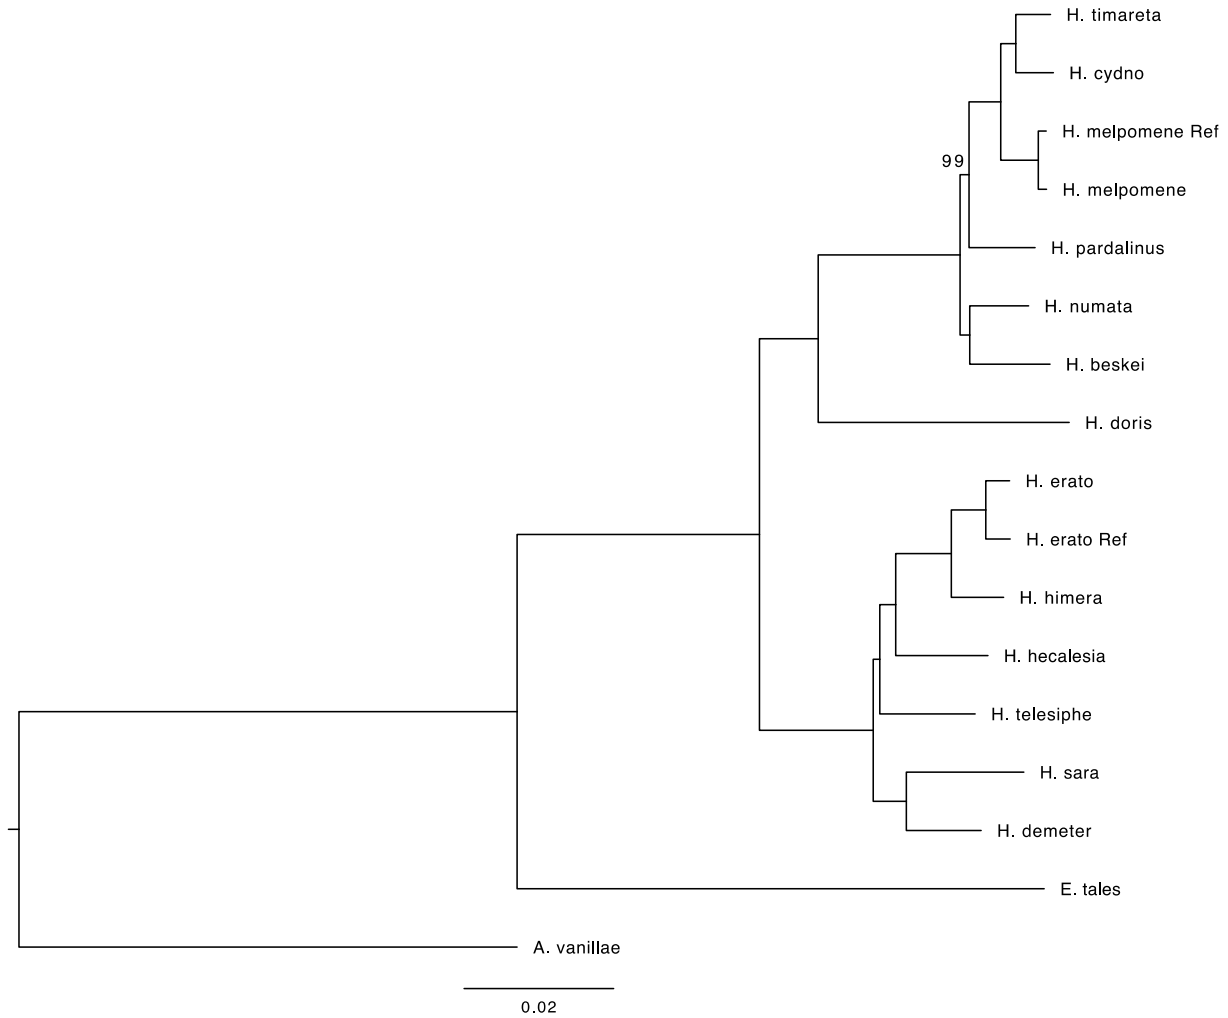

**Fig. S48 Concatenated tree for coding, fully aligned blocks among Heliconiini that are greater than or equal to 100 bp.**

*Bootstrap support values are shown for nodes with less than 100% support. The scale bar represents branch lengths, which correspond to the mean number of substitutions per site in the alignment.*

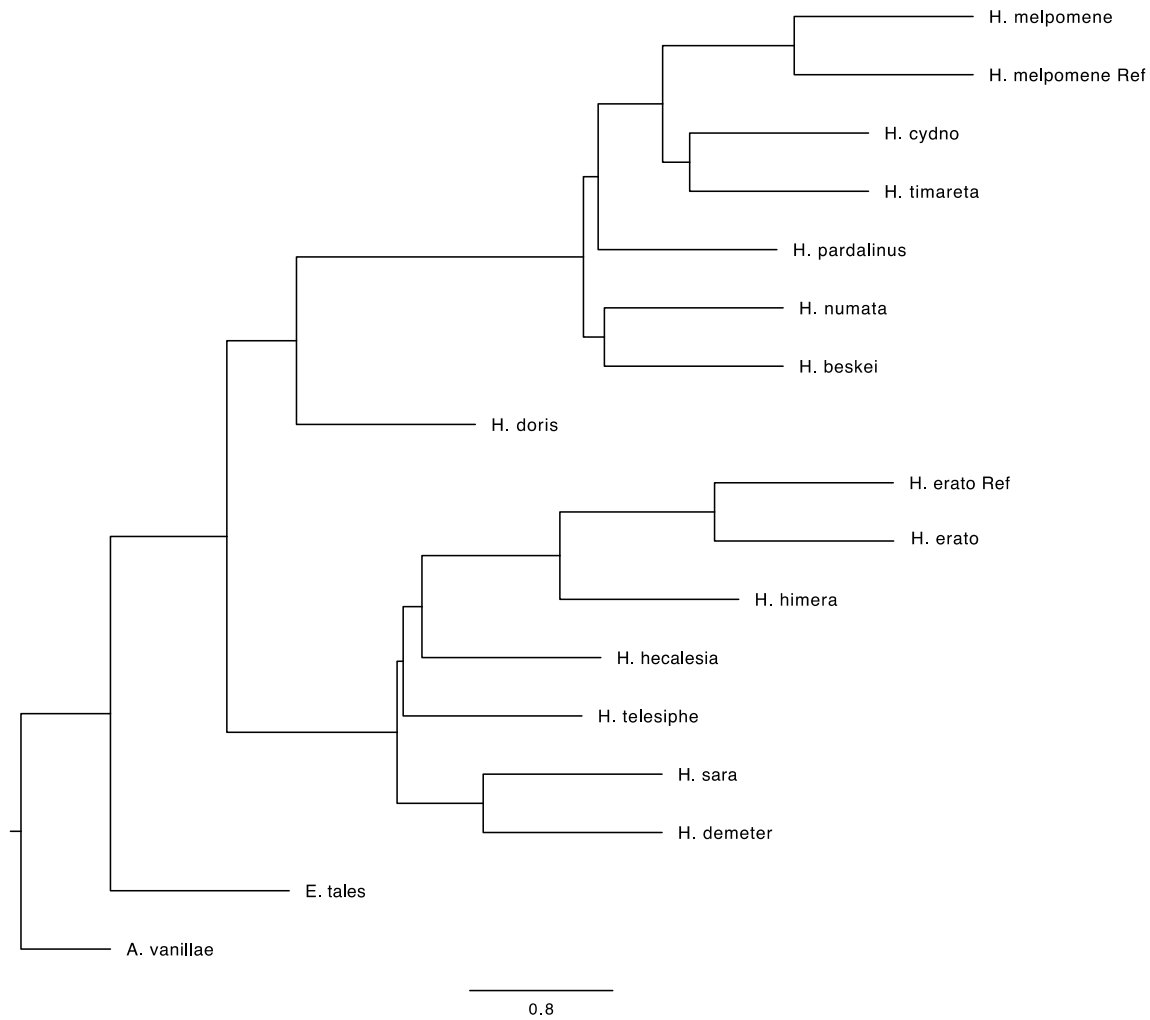

**Fig. S49 ASTRAL tree for coding, fully aligned blocks among Heliconiini that are greater than or equal to 100 bp.**

*Astral support values are shown for nodes with less than 1.0 support. Branch lengths in coalescent units.*

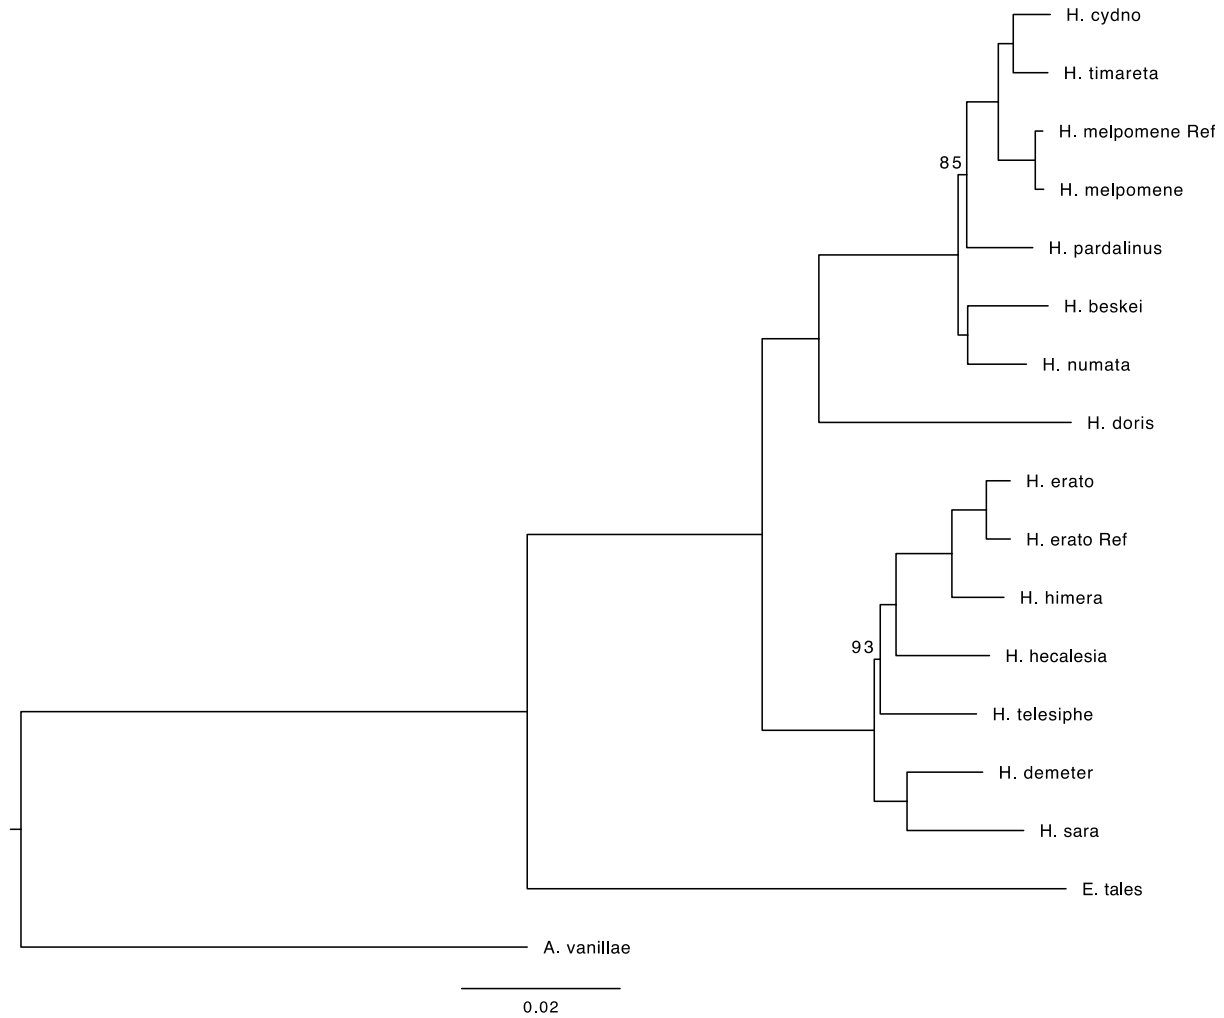

**Fig. S50 Concatenated tree for coding, fully aligned blocks among Heliconiini that are greater than or equal to 150 bp.**

*Bootstrap support values are shown for nodes with less than 100% support. The scale bar represents branch lengths, which correspond to the mean number of substitutions per site in the alignment.*

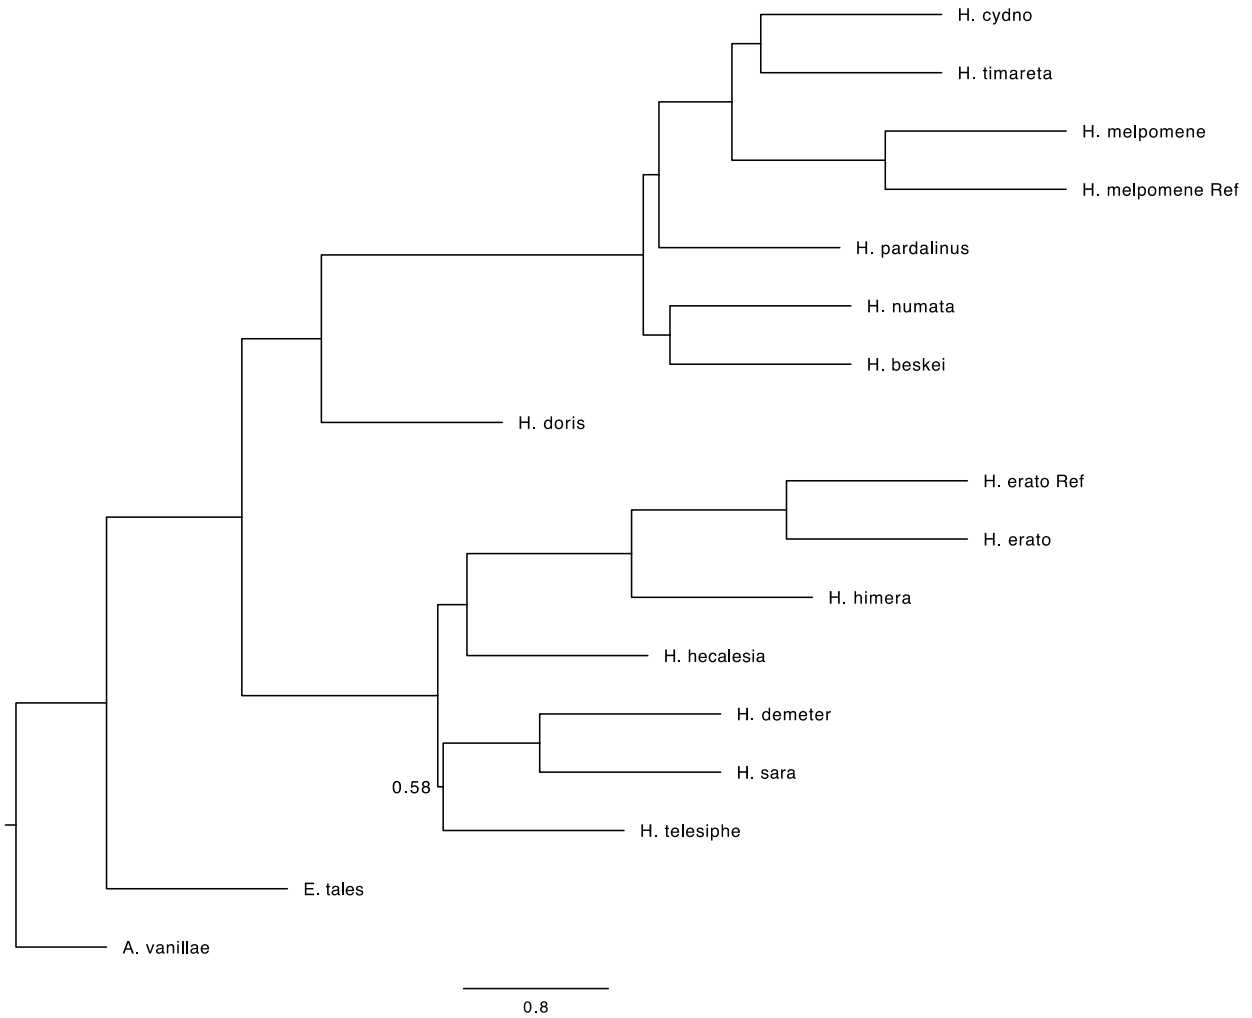

**Fig. S51 ASTRAL tree for coding, fully aligned blocks among Heliconiini that are greater than or equal to 150 bp.**

*Astral support values are shown for nodes with less than 1.0 support. Branch lengths in coalescent units.*

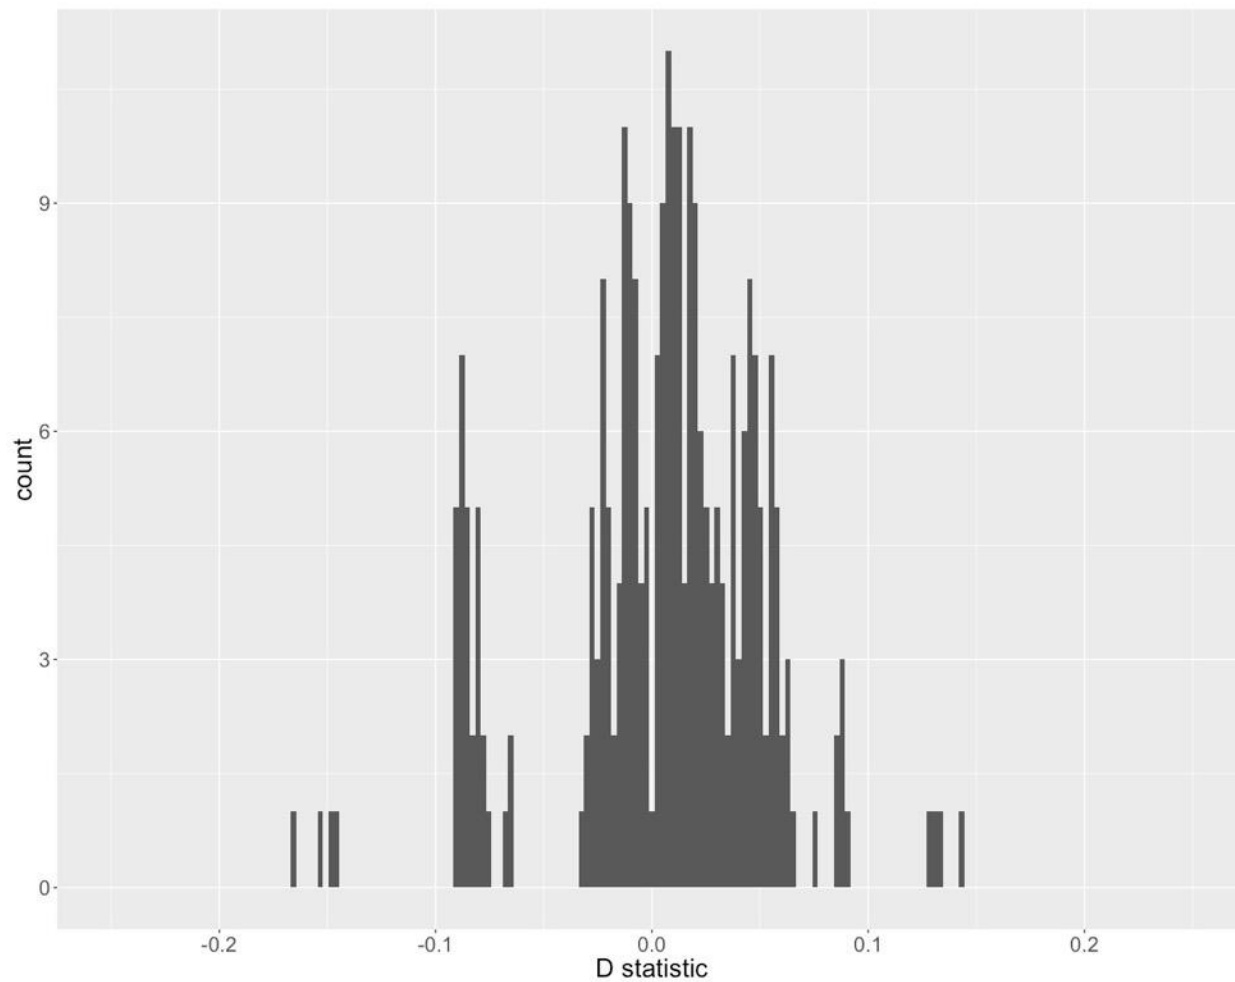

**Fig. S52** *D*-statistic values for all triplets.

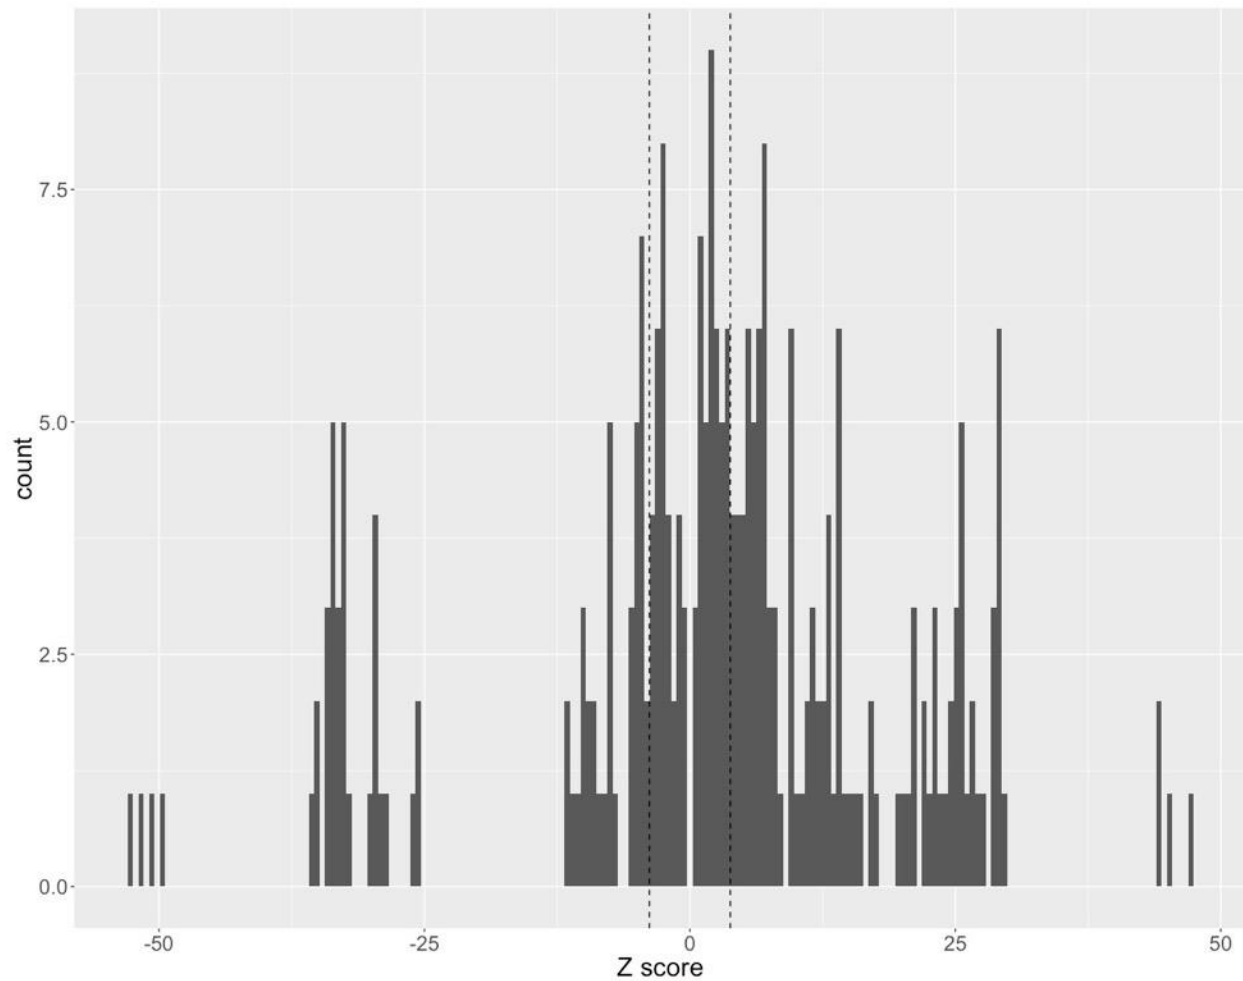

**Fig. S53 Z-values for *D*-statistics for all triplets**

*This histogram shows the Z-values for all comparisons shown in Fig. S52. The dotted lines represent significance at a .05 level after applying a Bonferroni correction.*



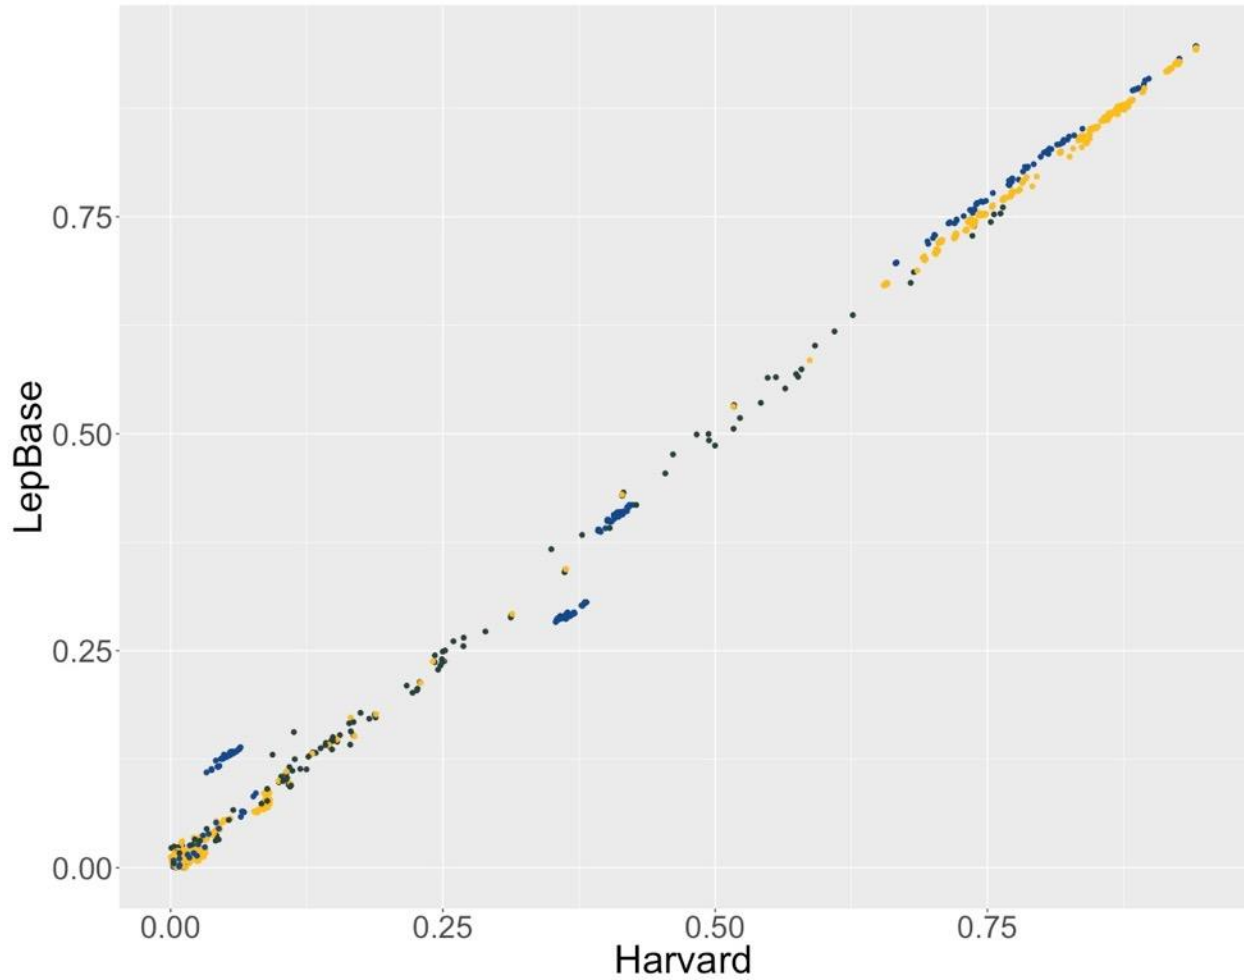

**Fig. S54 D-statistics are consistent between alignments**

*These plots show a comparison of the absolute value of D-statistics computed from the full-Lepidoptera alignment described here (x-axis, "Harvard"), and the Heliconiini alignment generated by lepbased.org (y-axis, "LepBase"). Dark green points are inter-clade comparisons, yellow are between clade, and blue are those involving H. doris. Both groups of H. doris points off the 1:1 line are inter-clade comparisons. Values are shown for all triplet topologies, not only the lowest value per triplet.*

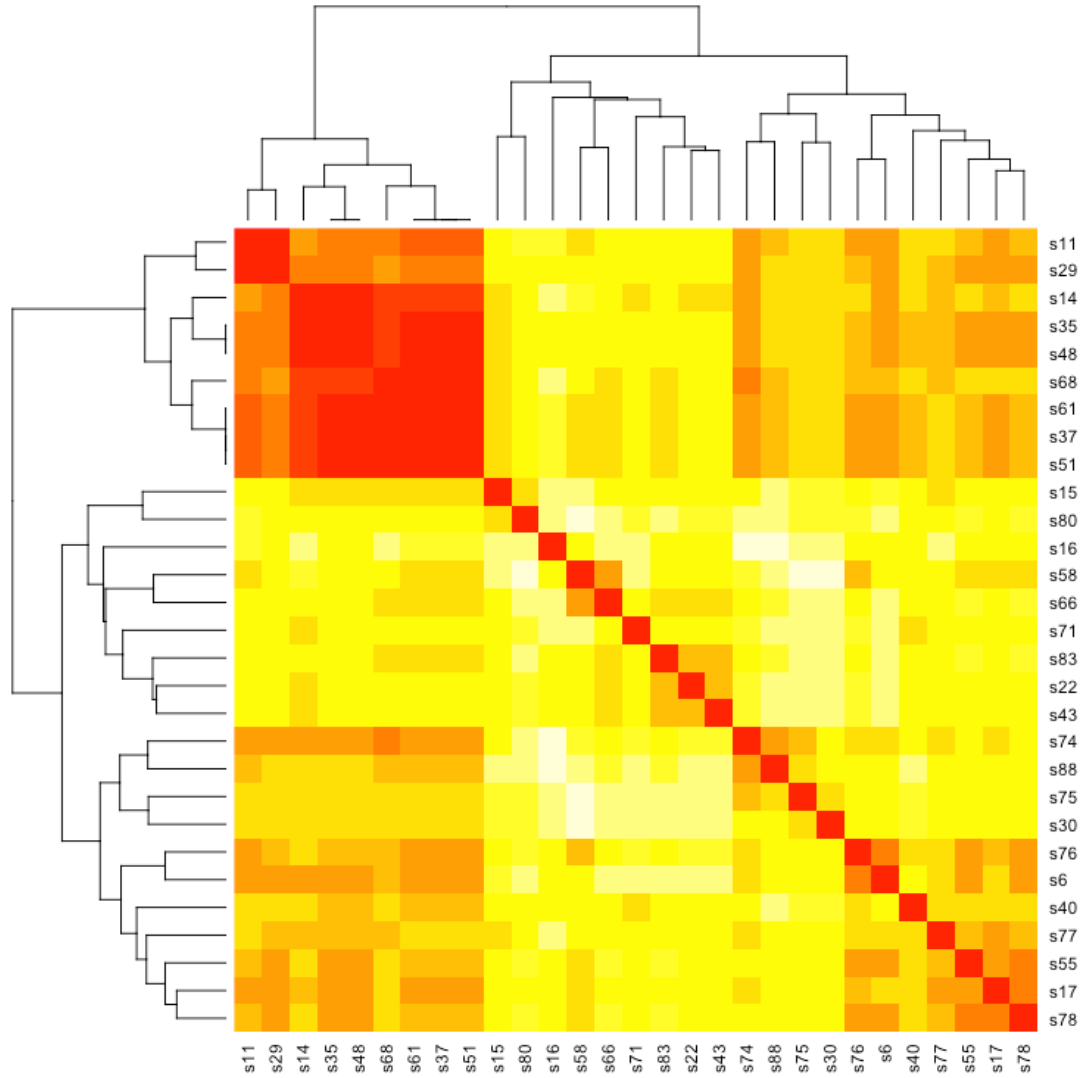

**Fig. S55 melpomene-silvaniform clade phylogenetic network clustering.**

*Matrix is symmetrical, and each row or column represents the most likely network in a single run of PhyloNet MCMC\_Seq. The branch lengths of the dendrograms represent Luay Nakhleh's reduced phylogenetic network distance metric  $c(88)$ , where 0 means the networks are identical. The top left section is populated by 9 very similar networks, while the remaining 20 networks are quite different from one another. The consensus network shown in the main text Fig. 1C was generated by summarizing the contents of the networks in the top left corner.*

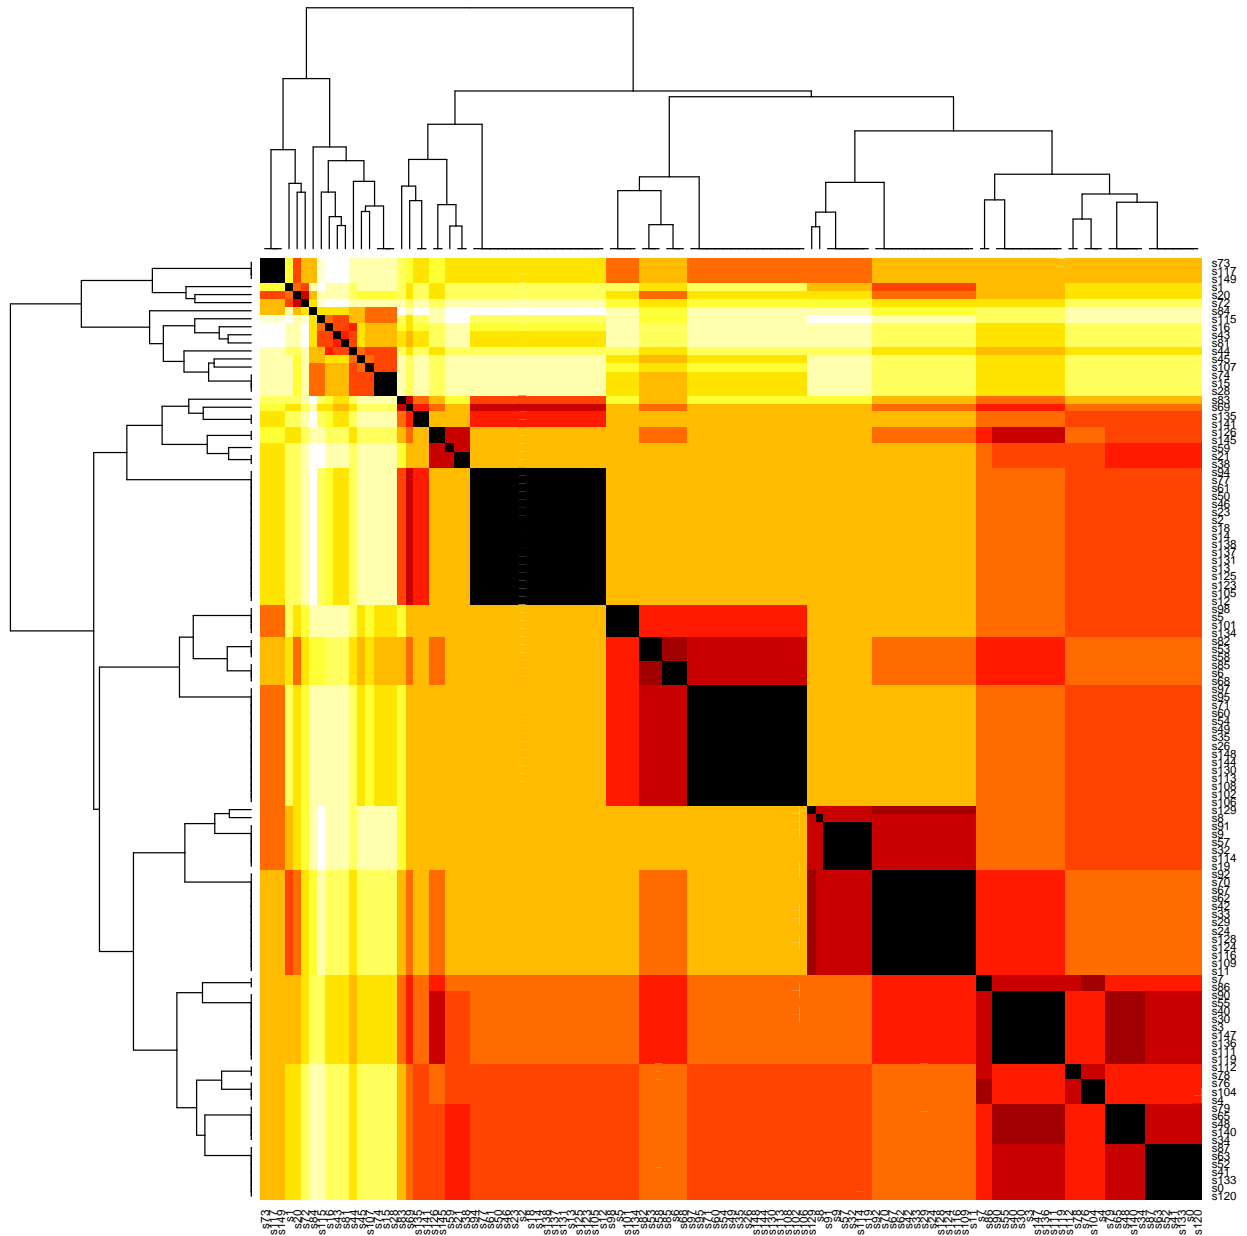

**Fig. S56 erato-sara clade phylogenetic network clustering.**

*Format of the matrix is identical to that in Fig. S55. We identify four well-represented regions of tree space among erato clade PhyloNet MCMC\_Seq runs.*

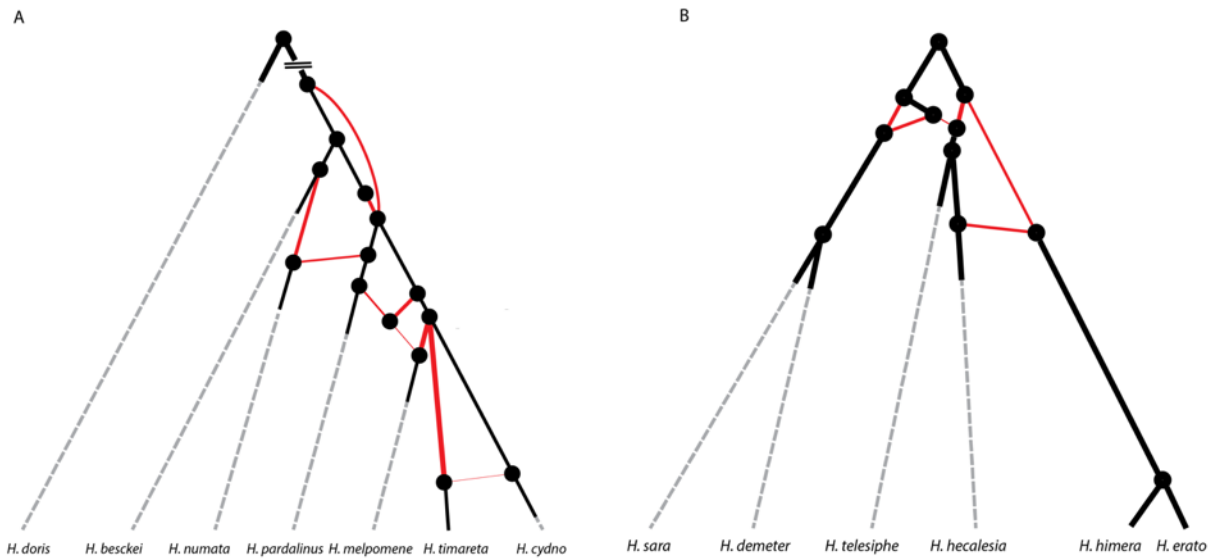

**Fig. S57 phylogenetic networks using PhyloNet Infer\_Network\_MPL.**

*A. melpomene-silvaniform clade network. B. erato-sara clade network*

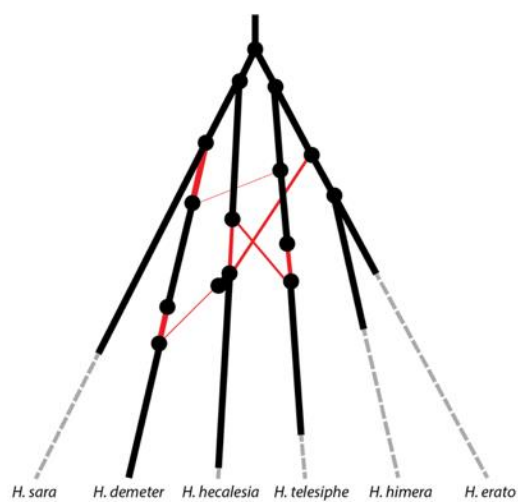

**Fig. S58 *erato* clade phylogenetic network using qpGraph**

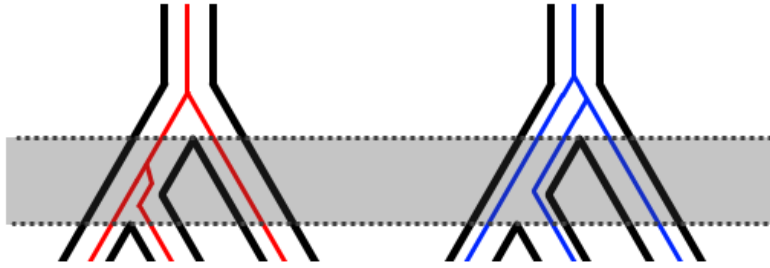

**Fig. S59 Coalescent framework**

*In gene trees matching the species tree topology (left, red), there is an additional window of time in between speciation events (highlighted in grey) where coalescence can occur. However, for non-matching topologies (right, blue) coalescence can only occur in the MRCA.*

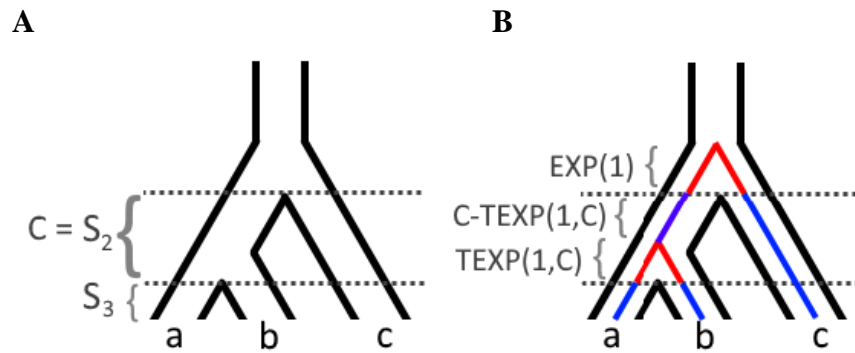

**Fig. S60 Branch length components**

*A* One sample tree for three species, with the relevant times between speciation events labeled. **B** Given a sample gene tree, we can split the branches into components based on their generating distribution.

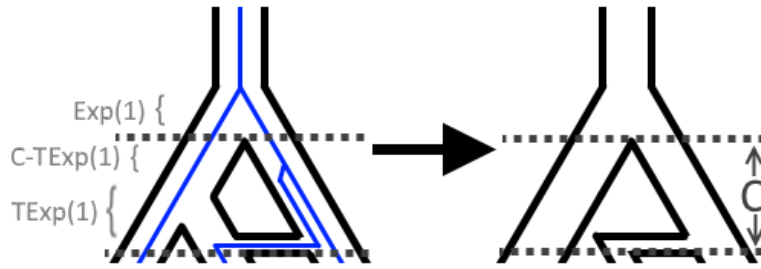

**Fig. S61 Branch length components of introgression topologies**

*If a gene tree follows an introgression path in the species graph, the species history that particular locus experiences can still be described completely as a tree. As a result, the internal branch distribution is of the form  $EXP(1)+C-TEXP(1;C)$ . In this case,  $C$  is the time from the introgression event back to the common ancestor of all three species. Using the notation in table S13, we have  $C = S2+S3-H$  for this example.*



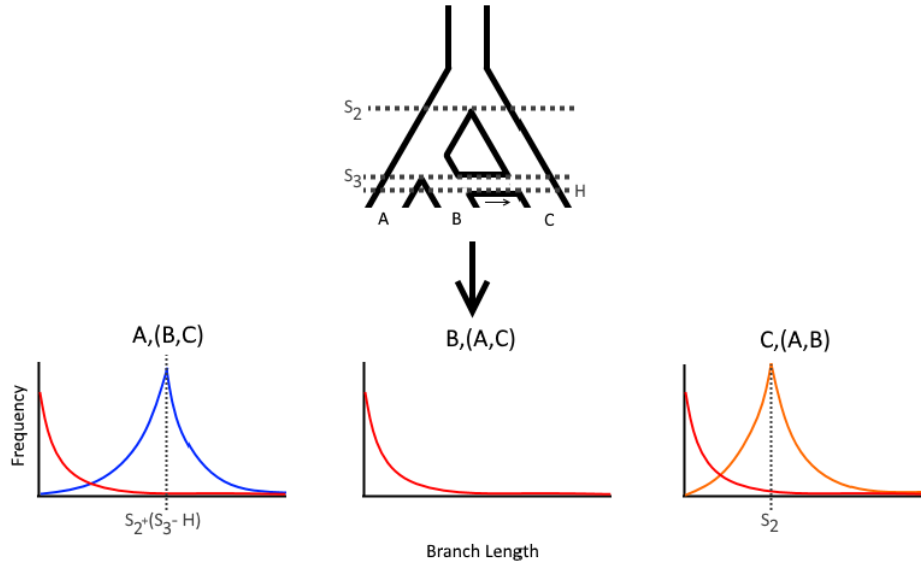

**Fig. S62 Expected triplet branch length distributions**

A species triplet with an introgression event indicated by the black arrow showing the direction of gene flow backwards in time generates a characteristic branch length distribution. For the topology generated by introgression, A, (B,C), a fraction of gene trees result from introgression (with distribution shown in blue) with  $C = S_2 + (S_3 - H)$ . Similarly for the concordant gene tree topology, a portion of gene trees are generated by speciation with  $C = S_2$  (shown in orange). In all three topologies, ILS generates trees following an exponential distribution (red).

**Algorithm:** Triplet Topology EM

**Input:**  $X$  the set of branch lengths for a given gene tree triplet topology.

$K \leftarrow 2$

$C_1 \leftarrow 0$

$C_2 \leftarrow 1$

$\pi_k \leftarrow 1/K$

$\lambda \leftarrow \bar{x}_i$

$L_1, L_2 \leftarrow 0, |L(\{x_i\}, \{C_k\}, \lambda)|$

**while**  $L_2 - L_1 > 10^{-6} * L_1$  **do**

$q_{C\lambda}(x_i) \leftarrow \pi_k f(x; C, \lambda) / \sum_k^K \pi_k f(x; C, \lambda)$

$C_2 \hat{\lambda} \leftarrow \operatorname{argmax}_{C\lambda} \sum_{i=1}^n q_{C_k}(x_i) \ln(f(x; C, \lambda))$        $\triangleright$  Find  $C\lambda | \lambda$ , detailed in 5.1.1

$\lambda \leftarrow \operatorname{argmax}_{\lambda} \sum_{i=1}^n q_{C_k}(x_i) \ln(f(x; C, \lambda))$        $\triangleright$  Find  $\lambda | C\lambda$ , detailed in 5.1.2

$\pi_k \leftarrow \operatorname{mean}_{x_i}(q_{C_k} \lambda(x_i))$        $\triangleright$  Update proportions to the mean of the soft assignments

$L_1 \leftarrow L_2$

$L_2 \leftarrow |L(\{x_i\}, \{C_k\}, \lambda)|$

**end**

**return**  $C_2, \lambda, \{\pi_k\}$

### Fig. S63 Branch length test EM algorithm

*Our expectation maximization implementation for inferring the mixture components of a triplet gene tree branch length distributions. Sections refer to sub-sections of supplemental information section 7.*

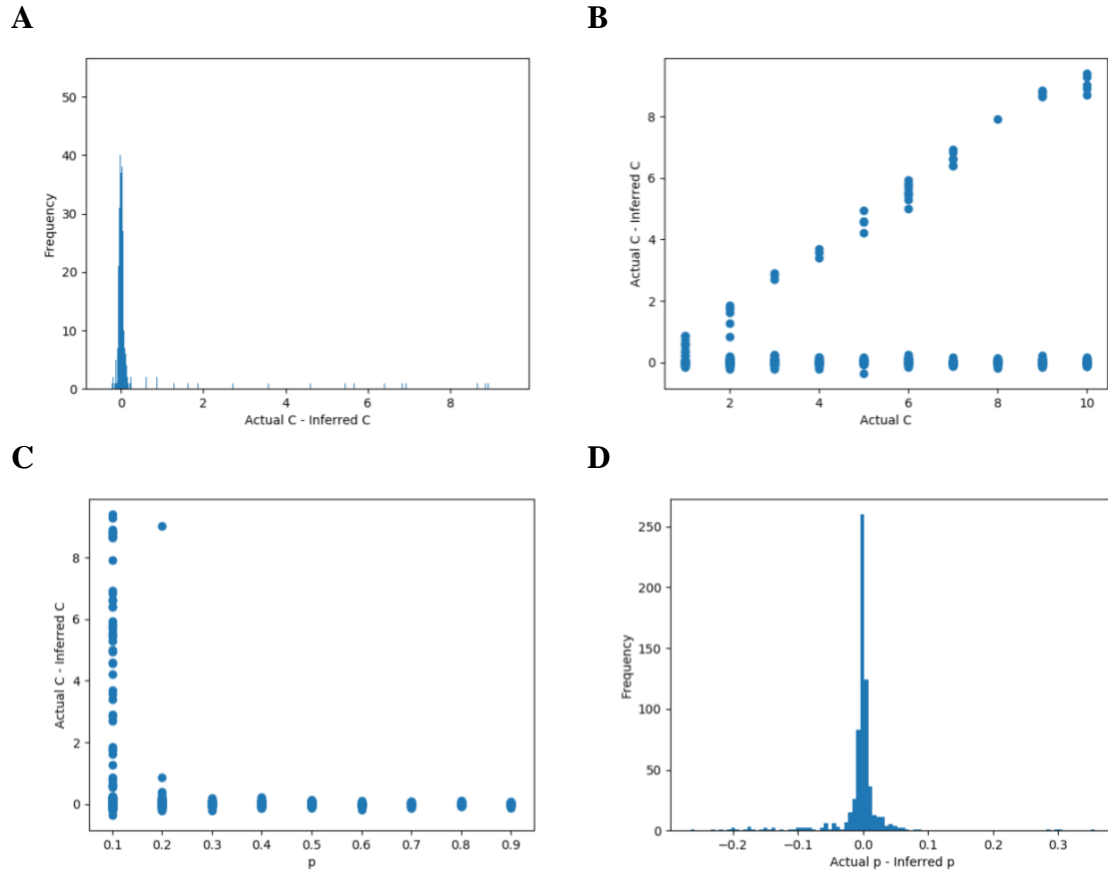

**Fig. S64 Tree simulation results**

*Set of plots describing the behavior of the error in parameter estimates for a set of 650 coalescent trees each for 90 parameter combinations with 10 replicates each. **A** Plot of the error in the estimate of the  $C$ . **B** Errors demonstrating the lack of false positives in  $C$  estimates. **C** Error in  $C$  as a function of mixing proportion, showing the error is due to a detection threshold. **D** Plot of the error in the estimate of the mixing proportion of the non-exponential distribution,  $p$ .*

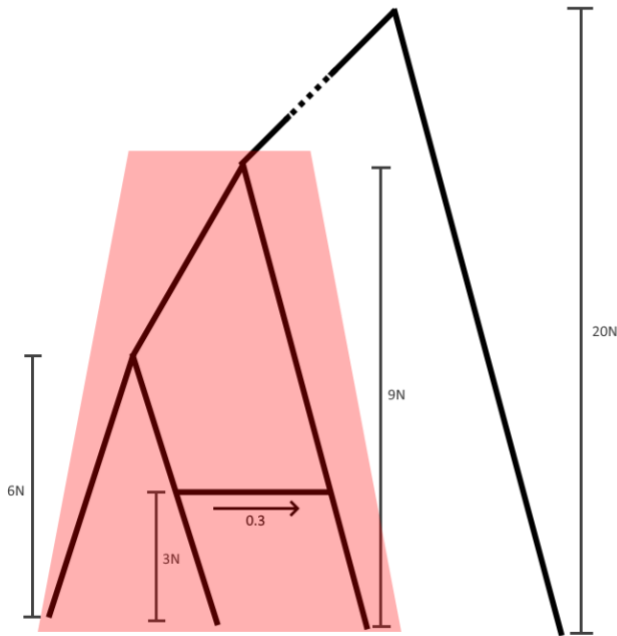

**Fig. S65 Sequence simulation demographic model**

*The demographic model used for the coalescent simulations to test the noise in sequence generation alone, with the triplet of interest highlighted in red. This model was used for simulations generating the results of Fig. S66. We used  $N = 1E6$ , and a probability of following the introgression branch of 0.3, with direction of gene flow backwards in time shown by the arrow. For the discordant introgression topology, this corresponds to 78.3% of loci resulting from introgression, with a C-value of 3.*

**A**

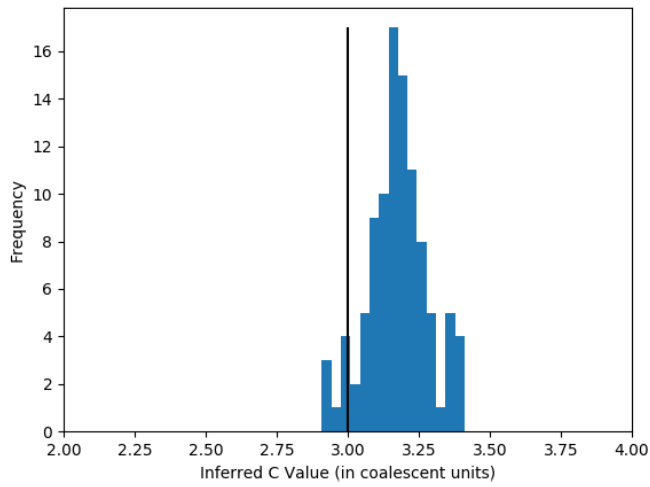

**B**

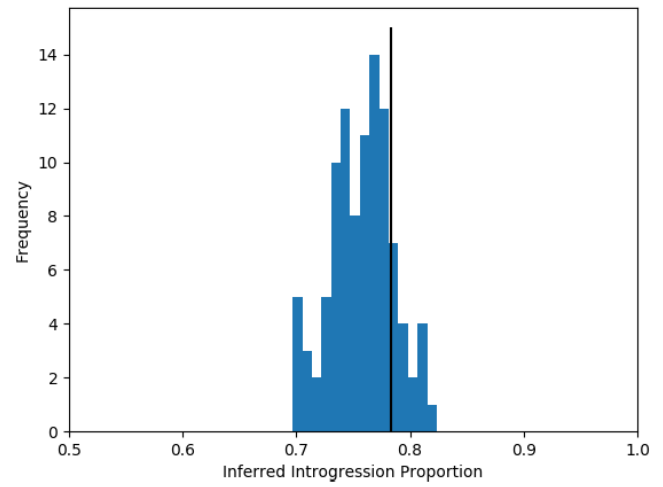

**Fig. S66 Sequence simulation results**

*The estimates of  $C$  and  $p$  for the introgression distribution from 100 replicates of sequence simulations using the same underlying set of true gene genealogies at 1000 loci. The true values are indicated by the vertical black line. Slight inflation in  $C$  causes an underestimate of the introgression probability. **A** Estimated  $C$  values. **B** Estimated introgression probabilities.*

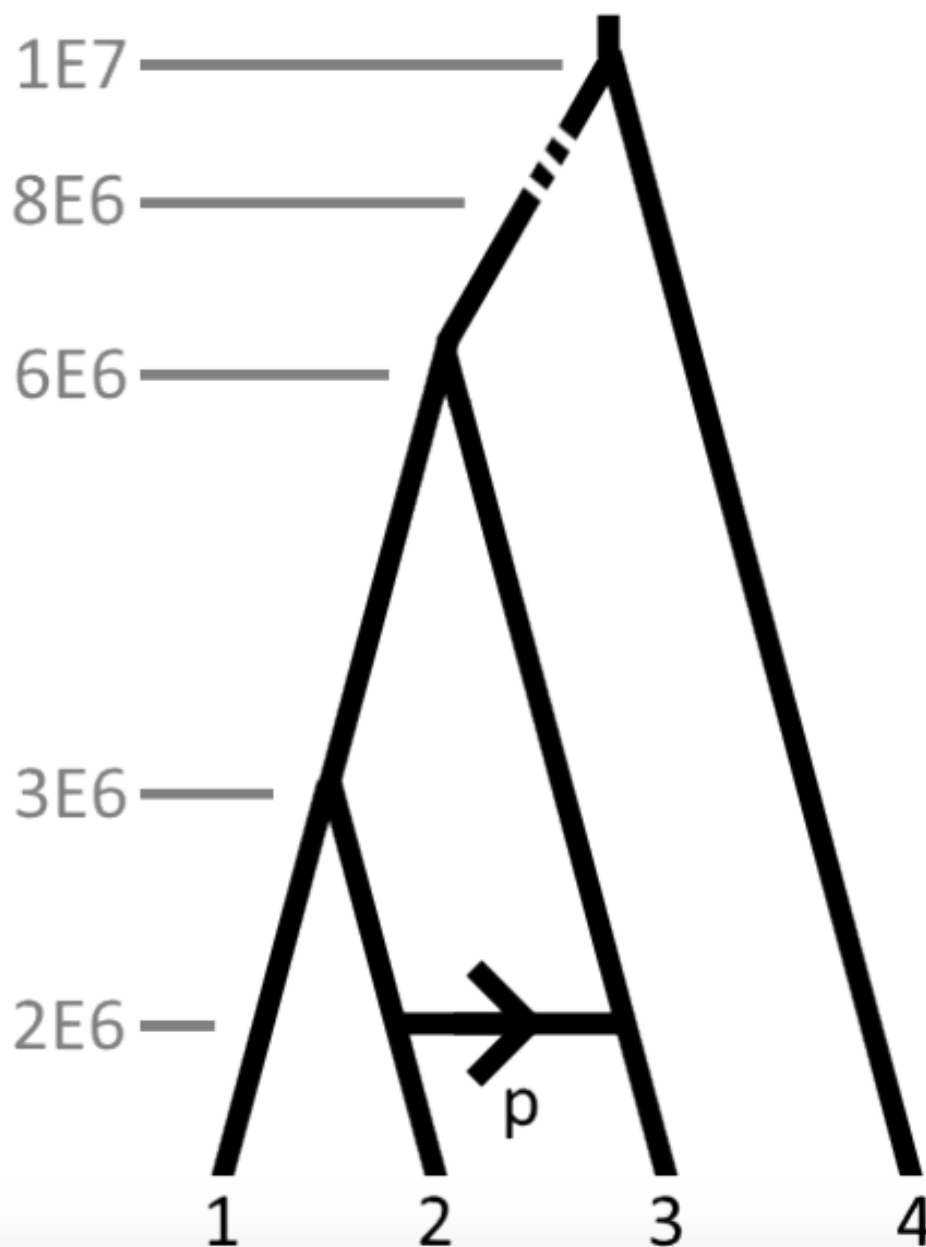

**Fig. S67 Null demographic model used for simulations of demographic effects**

*This model was used in simulations to generate Fig. S68-S69 and Fig. S74-Fig. S75. The arrow shows the direction of introgression backwards in time. All time units are listed in generations.*

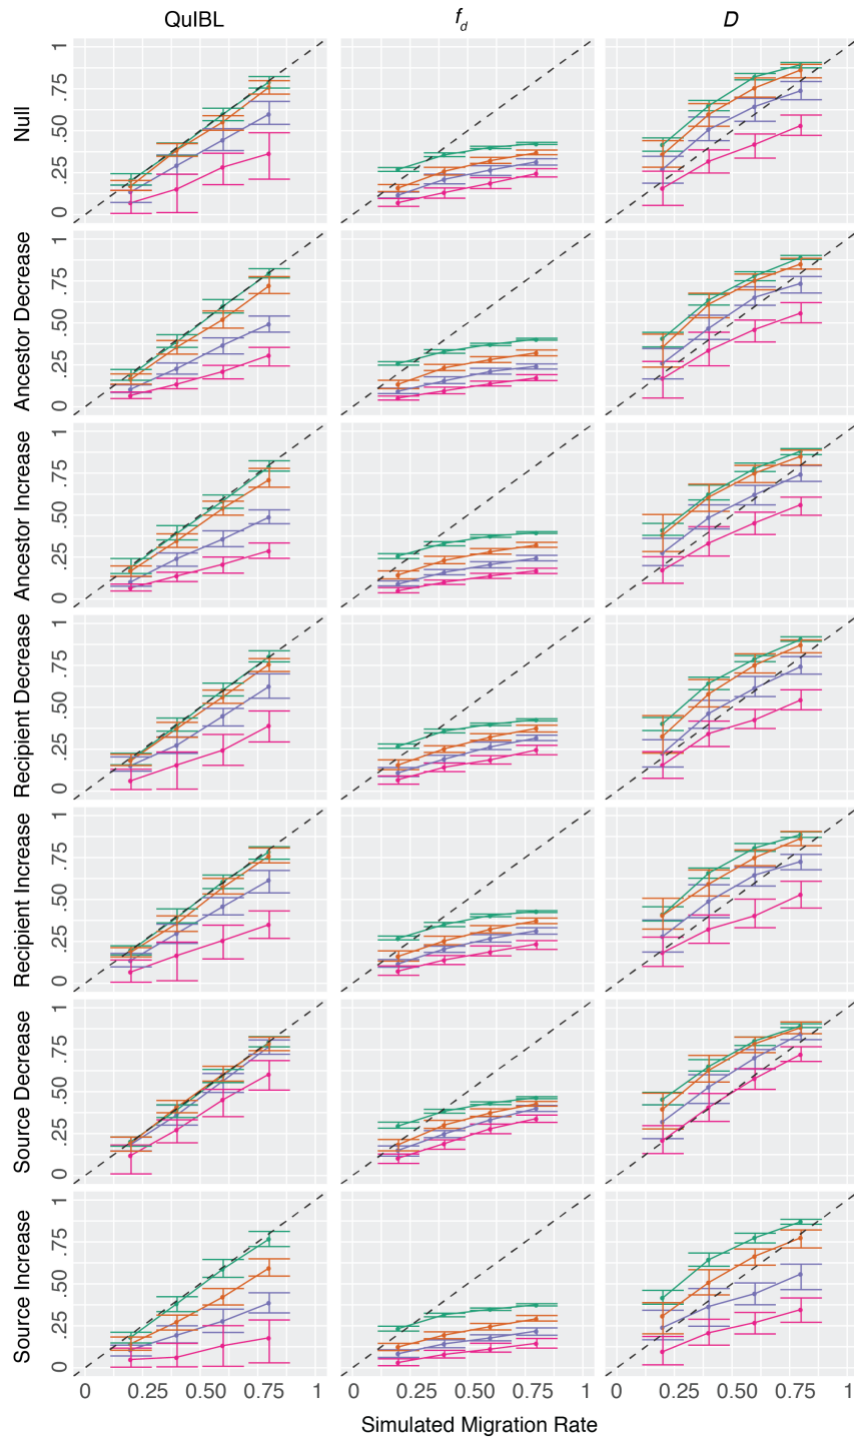

**Fig. S68 Effects of changing demography**

Each row represents a different demographic scenario. The null model is as described in Fig. S65. Each "increase" represents a multiplication of population size by a factor of 2 for the relevant branch, and each "decrease" represents a halving of population size for the relevant branch. Base population sizes are represented by colors. Green: 250,000; Orange: 500,000; Blue: 1,000,000; Magenta: 2,000,000

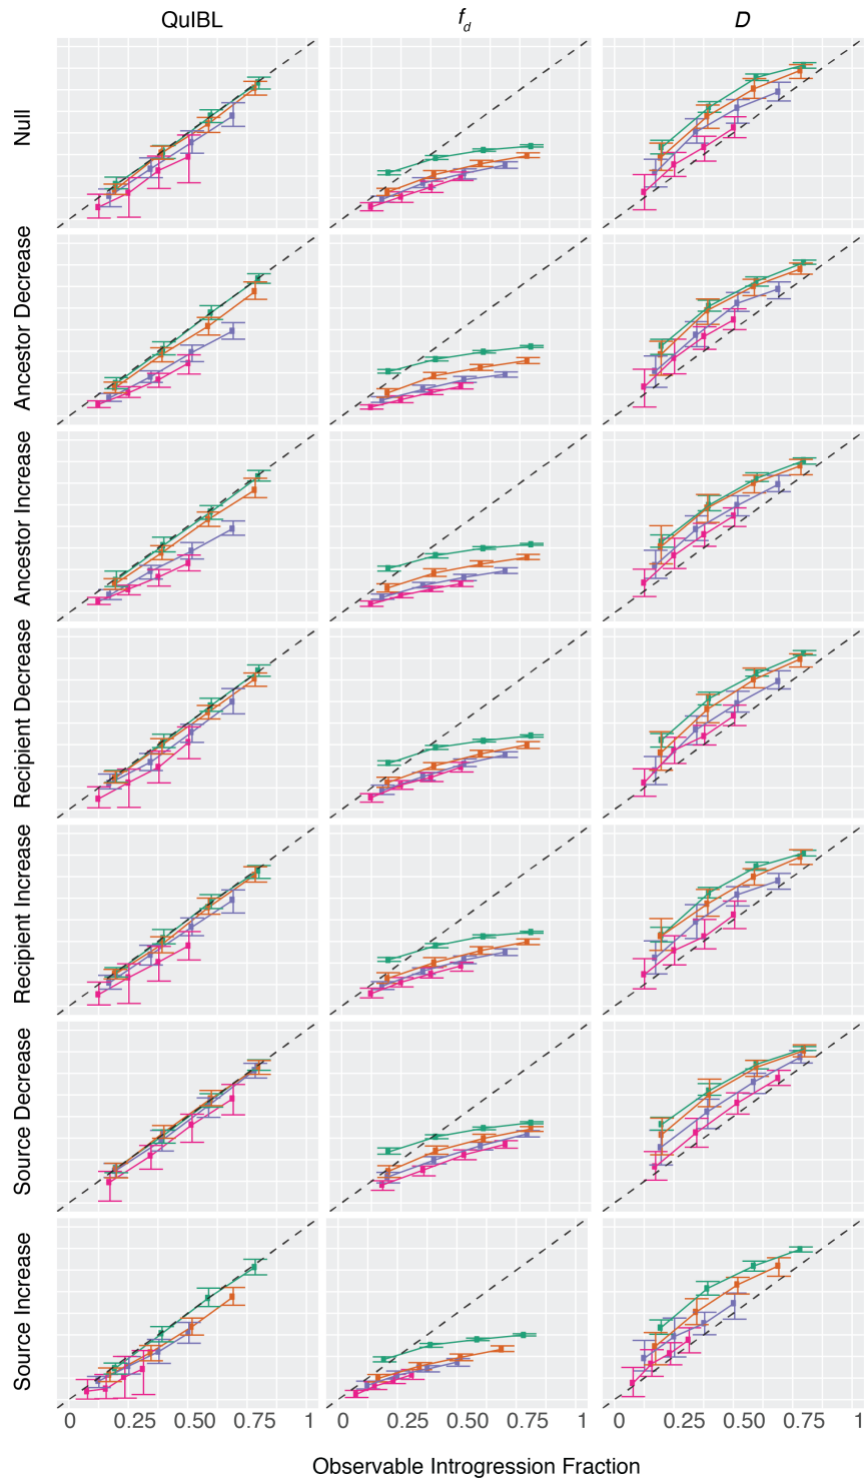

**Fig. S69 Effects of changing demography; observable introgression fraction**

Demographic scenarios are as in Fig. S68. The x-axis here represents the observable introgression fraction, or proportion of lineages that experience introgression and do not experience ILS. Base population sizes are represented by colors. Green: 250,000; Orange: 500,000; Blue: 1,000,000; Magenta: 2,000,000



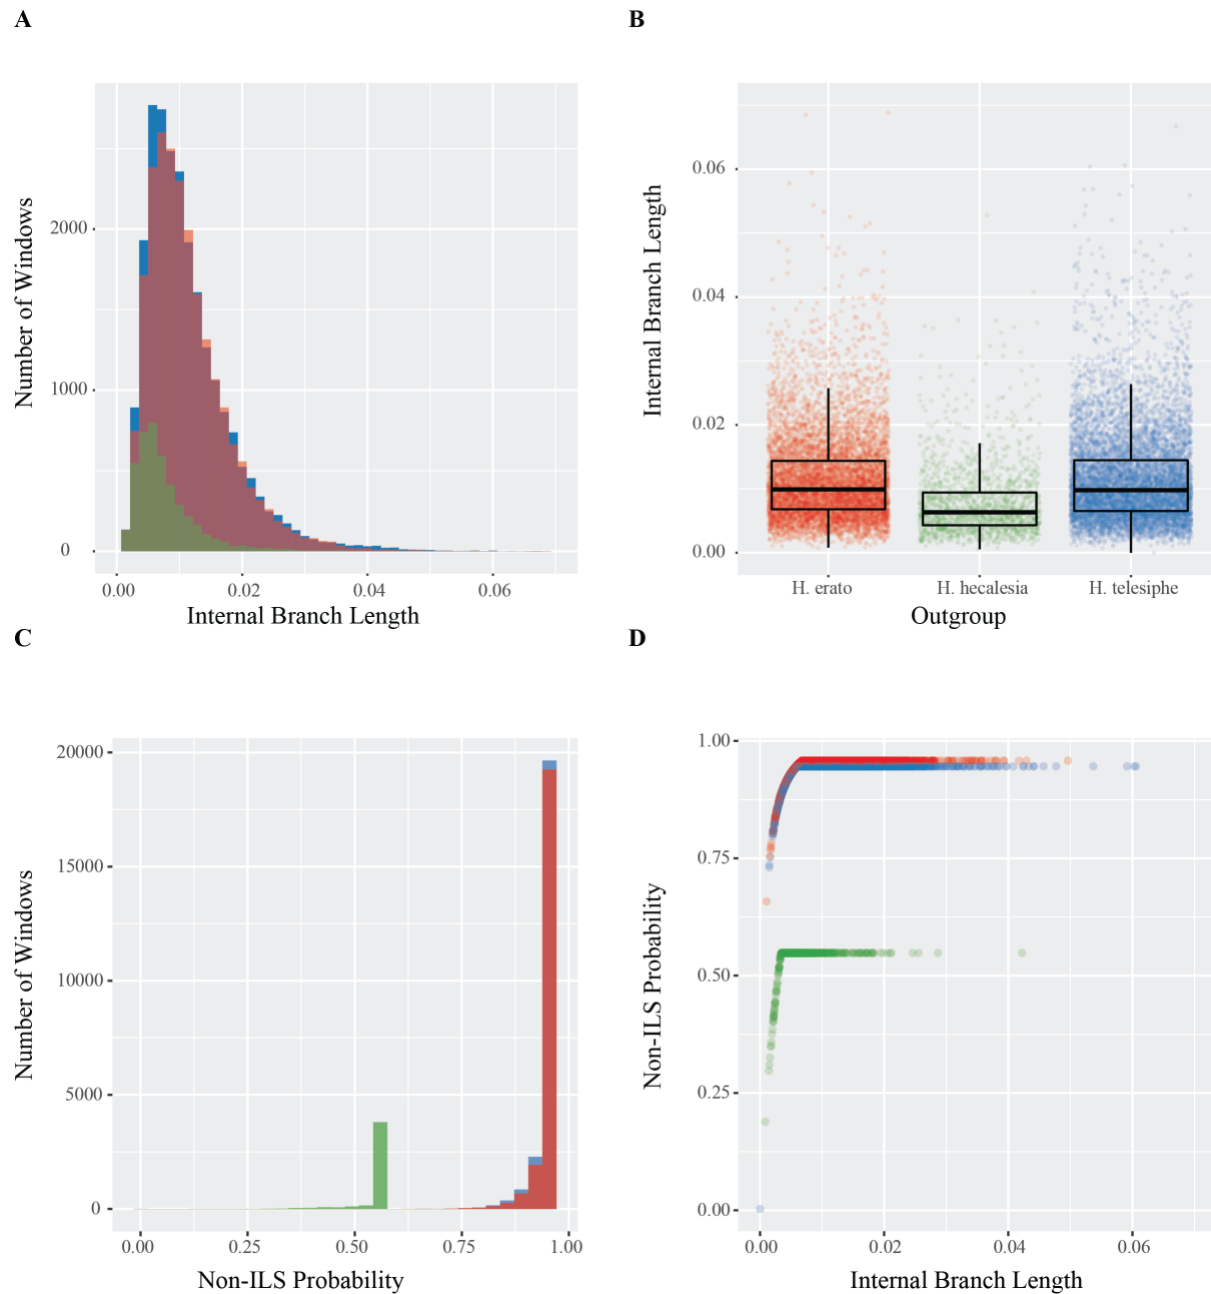

**Fig. S70 Representative branch length test**

*This figure shows the input and output for the internal branch length test with the triplet H. erato + H. hecalesia + H. telesiphe. **A** Distribution of internal branch lengths, colored by topology. In all panels, blue represents the topology where H. telesiphe is the outgroup (concordant with species tree), red is H. erato as outgroup (consistent with introgression between H. telesiphe and H. hecalesia or ILS), and green is H. hecalesia as outgroup (consistent with introgression between H. telesiphe and H. erato or ILS). **B** Boxplot of internal branch lengths, showing the strongly reduced mean branch length when H. hecalesia is the outgroup. **C** Distribution of non-ILS probability for each topology. **D**. Relationship between internal branch length and probability of belonging to the non-ILS (speciation or introgression) distribution.*

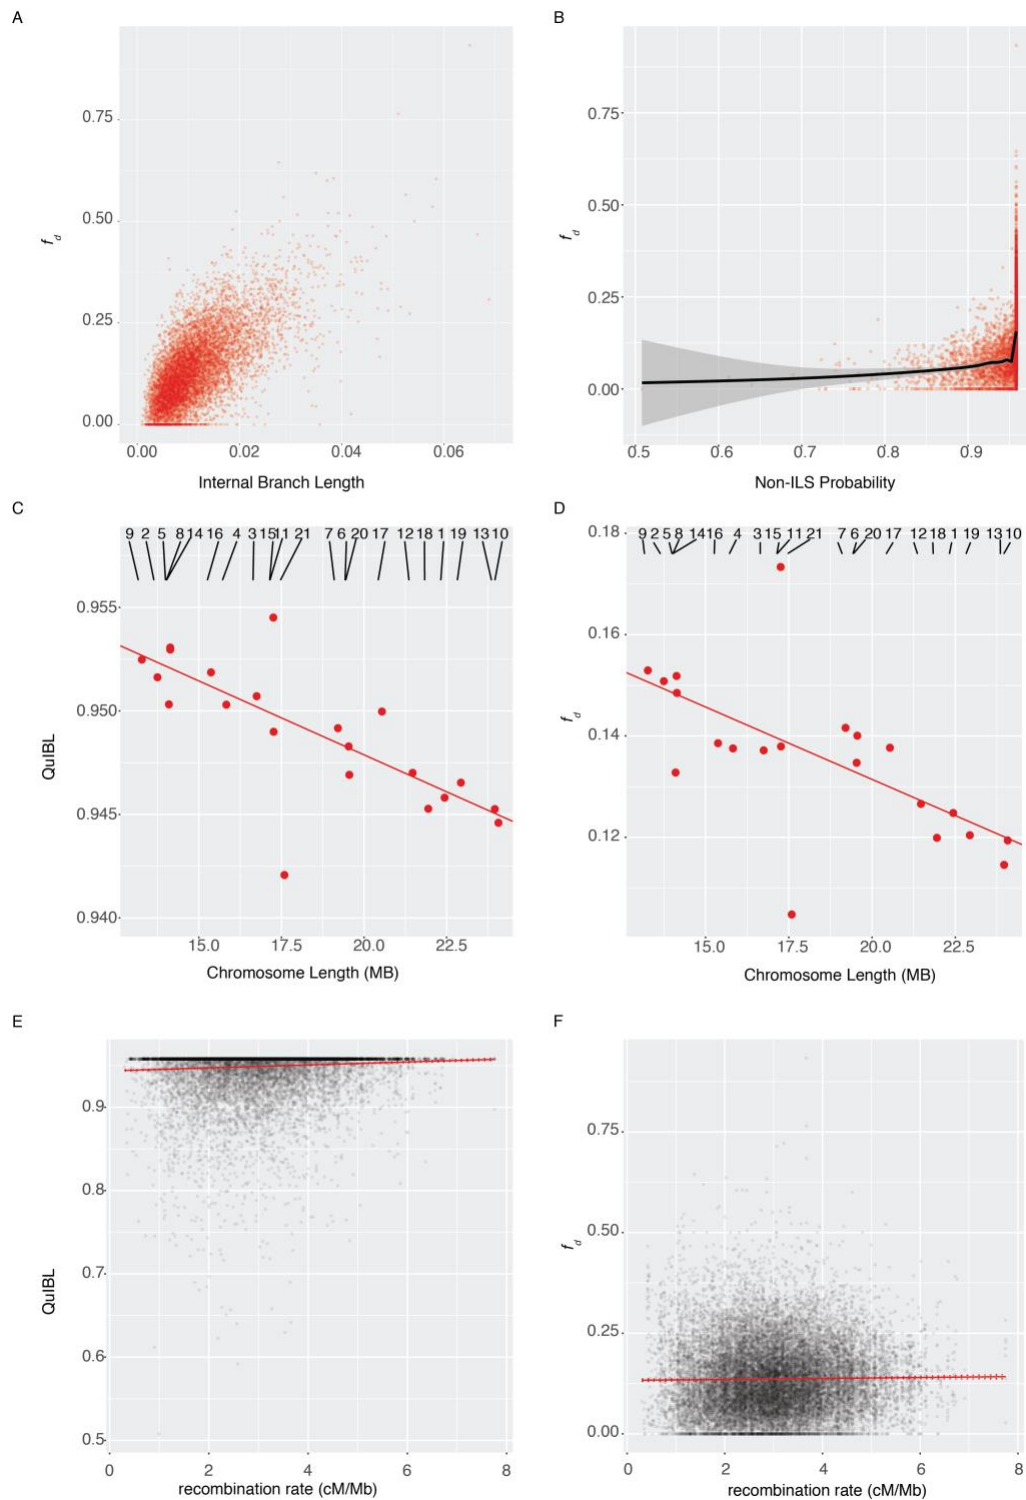

**Fig. S71 Comparison of introgression topology branch length test to  $f_d$**

All plots use only those windows of the triplet shown in Fig. S70 in which *H. erato* is inferred to be the outgroup, consistent with introgression between *H. telesiphe* and *H. hecalesia*. **A** Internal branch length is strongly, positively correlated with  $f_d$ . **B** Inferred non-ILS probability is positively correlated with  $f_d$ . However, a large proportion of non-ILS probability

values are equal to the maximum value, in this case 0.96. **C** shows the correlation between chromosome length and non-ILS probability, while **D** shows the correlation between chromosome length and  $f_a$ . Both metrics are significantly correlated with chromosome length, but the correlation non-ILS probability is stronger (see Section 8). **E** shows the correlation between local recombination rate and non-ILS probability, while **D** shows the correlation between local recombination rate and  $f_a$ . Both metrics are significantly correlated with local recombination rate, but the correlation non-ILS probability is again stronger (see Section 8).

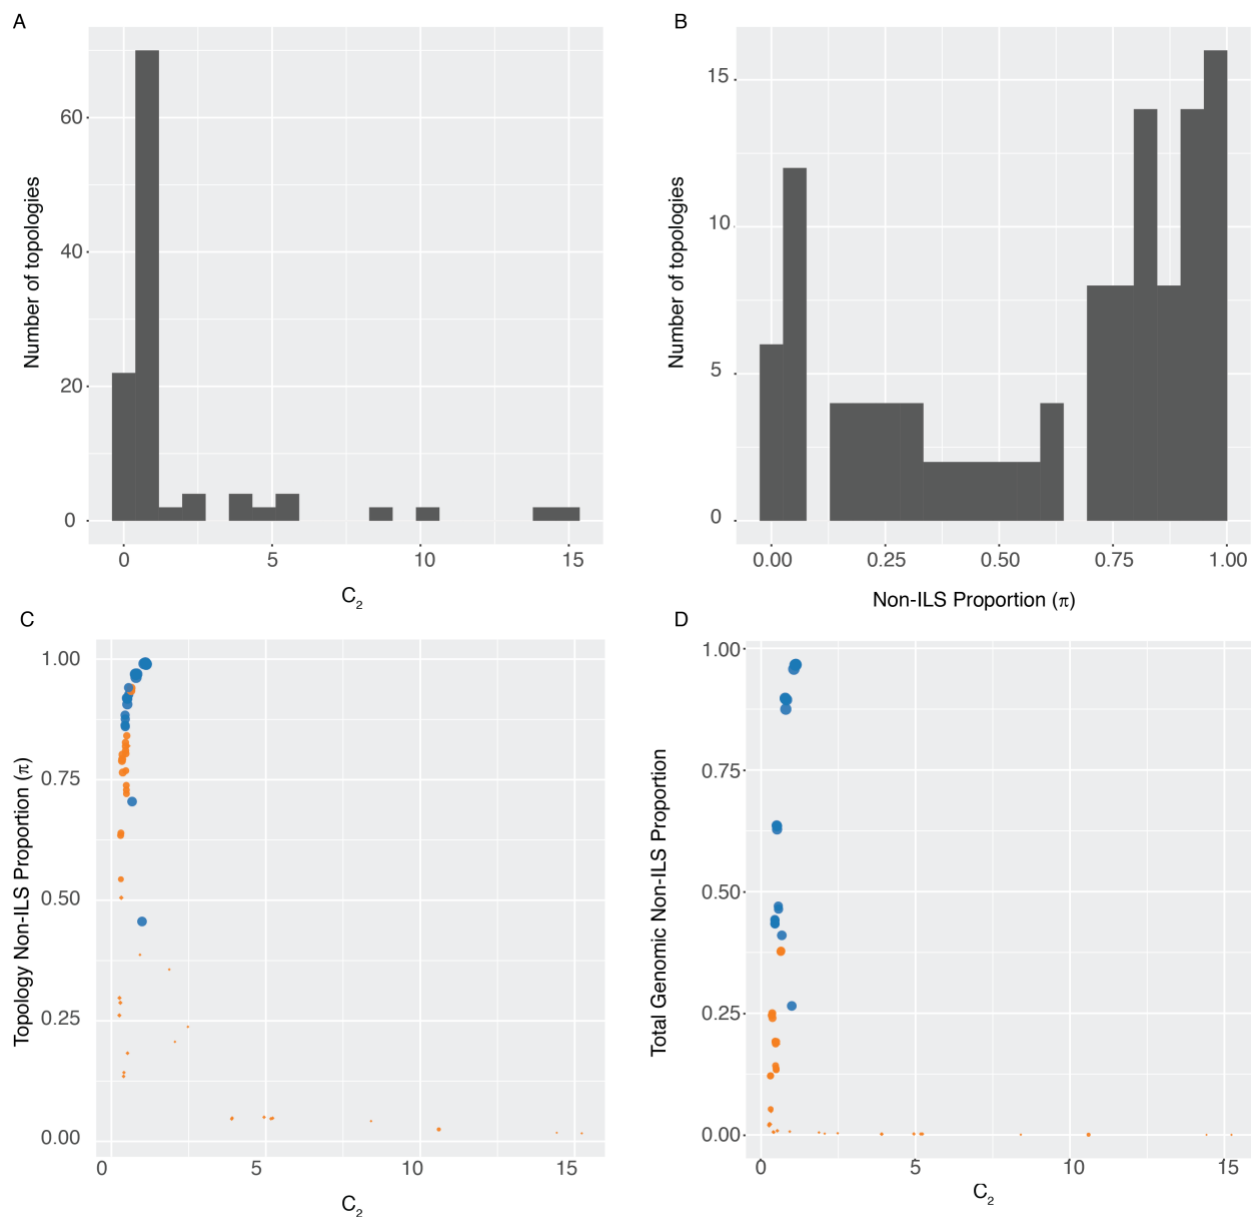

**Fig. S72 Branch length test, all *erato* clade triplets**

**A.** Distribution of inferred internal branch lengths. X-axis is in coalescent units ( $2N_e$ ). **B.** Distribution of inferred non-ILS proportion. This represents either speciation branches or introgression branches. **C** Relationship between internal branch length ( $C_2$ ) and non-ILS proportion of each topology. Size of each point corresponds to the proportion of trees in the respective triplet that recover the topology. Circles represent topologies significant for a non-ILS component, and diamonds represent those that are not significant. Blue triplets are concordant with the species tree. **D** Relationship between internal branch length ( $C_2$ ) and proportion of non-ILS trees of each topology present in the genome. This value was obtained by multiplying the probability that each topology corresponds to introgression by its genomic frequency.

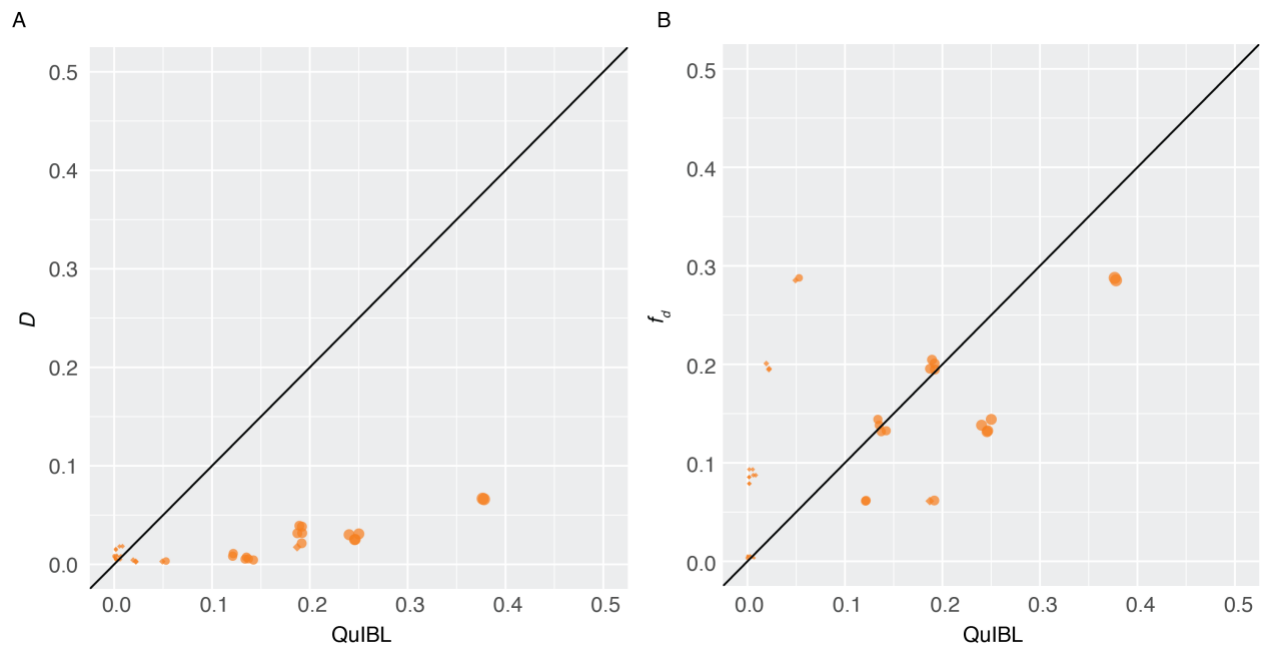

**Fig. S73 All topologies, comparison of branch length test to  $D$  and  $f_a$**

*Comparison of all concordant erato clade triplet topologies non-ILS proportions to **A** the absolute value of the mean  $D$  statistic and **B** the mean value of  $f_a$ . Size, shape, and color of points are as in Fig. S72 C and D.*

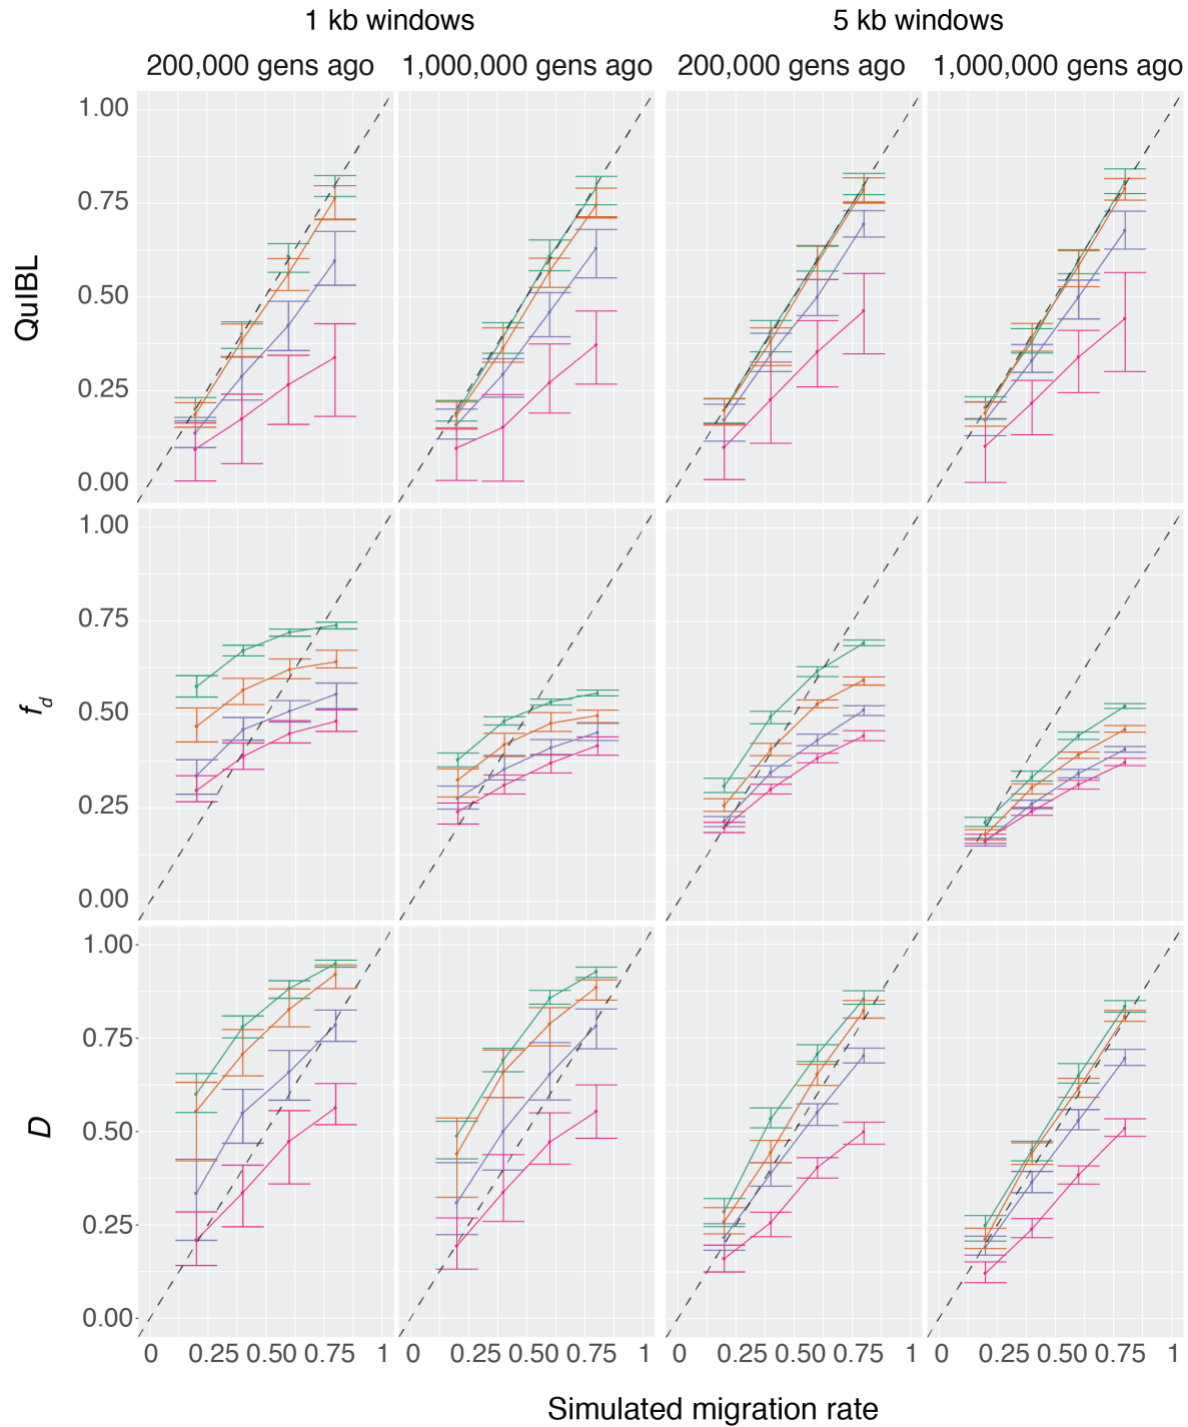

**Fig. S74 Effects of timing of introgression on migration rate estimation**

Backbone tree is as in Fig. S67. Introgression occurs either 200,000 generations in the past or 1,000,000 generation in the past. Window sizes of 1 kb or 5kb demonstrate the effect of noise in the inference. In these simulations, there is no recombination. Population sizes are represented by colors. Green: 250,000; Orange: 500,000; Blue: 1,000,000; Magenta: 2,000,000

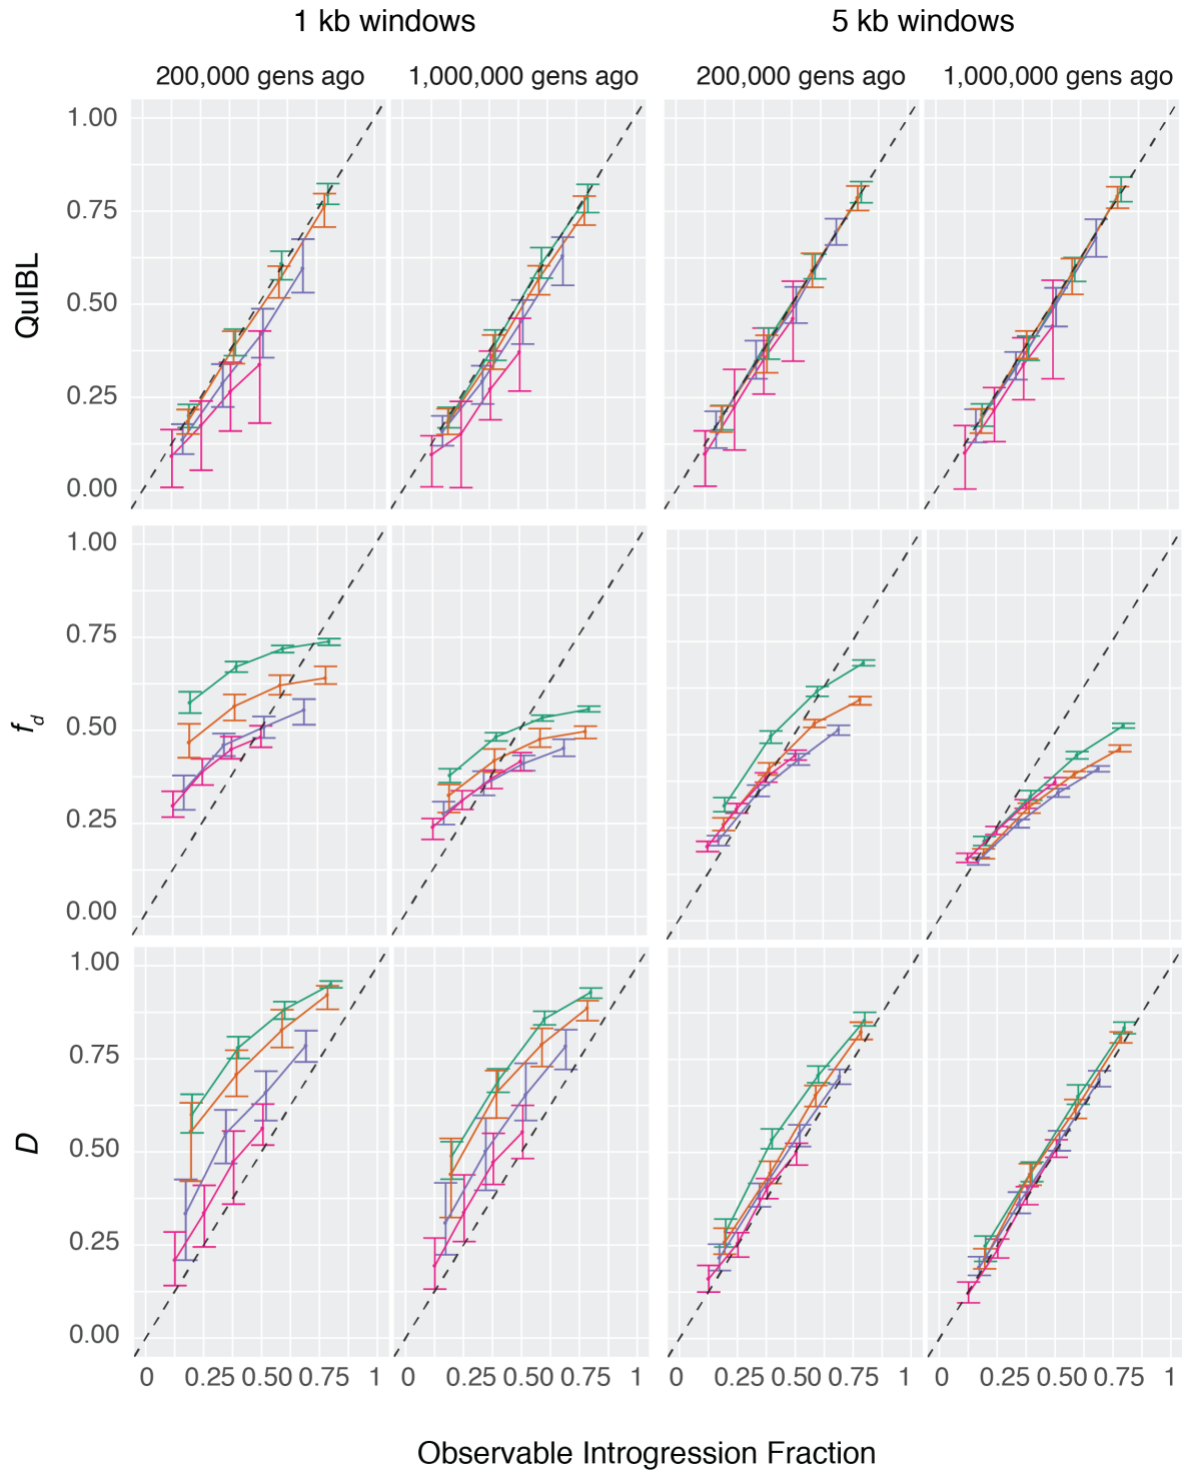

**Fig. S75 Effects of introgression timing on observable introgression fraction estimation**

See Fig. S74 above. Here, inferred statistics are compared to observable introgression fraction. Population sizes are represented by colors. Green: 250,000; Orange: 500,000; Blue: 1,000,000; Magenta: 2,000,000

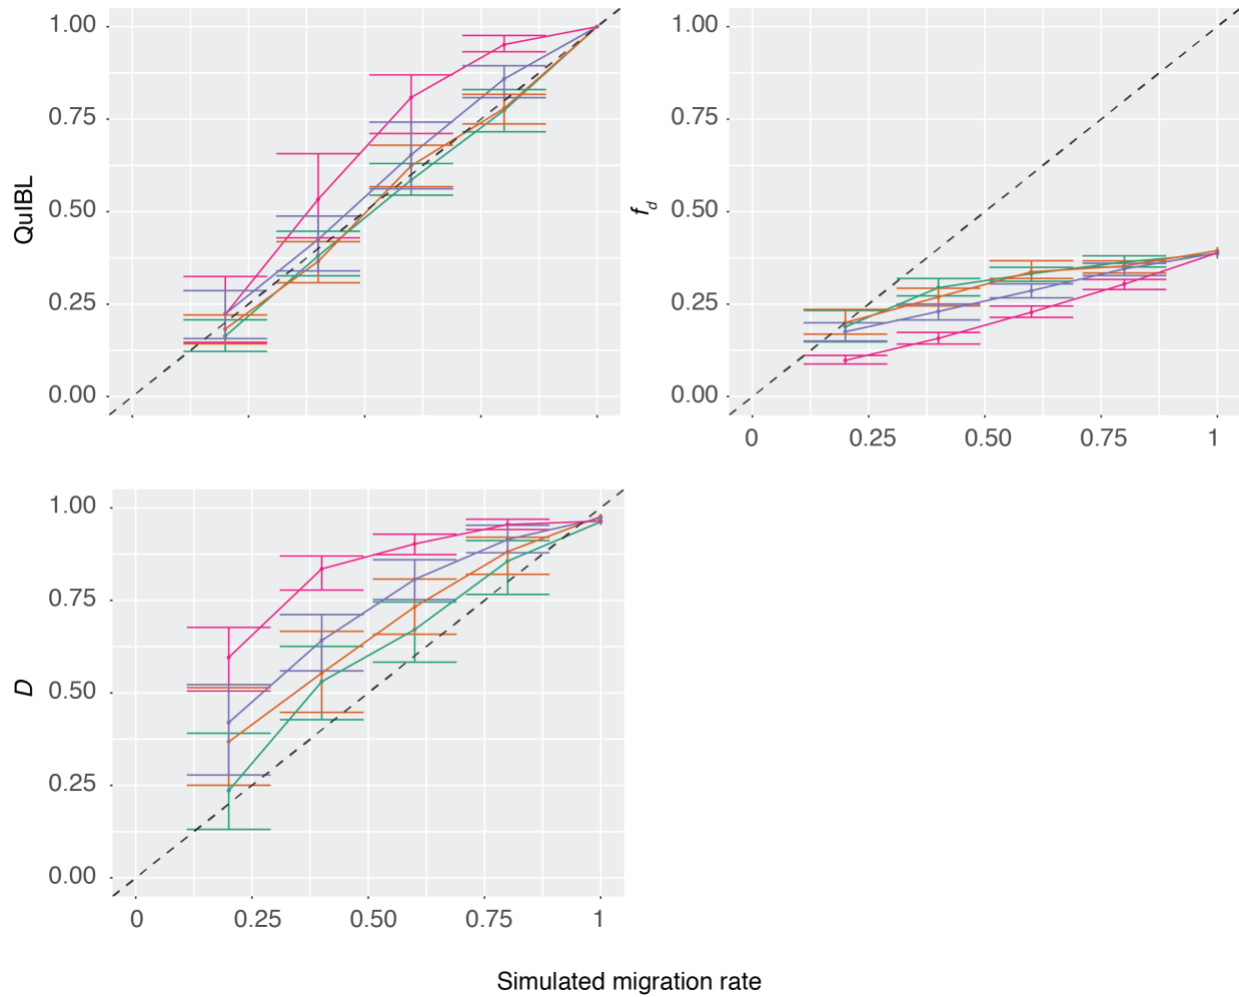

**Fig. S76 Effects of recombination**

Here, branch lengths correspond to estimates of divergence times for *H. erato*, *H. hecalesia*, *H. telesiphe*, and *H. melpomene*, calculated from 5 kb windows. Values for introgression time is  $0.5 * \text{time since divergence of } H. erato \text{ and } H. hecalesia$ , estimated as 4.5 million years. Population size is estimated at 500,000. Per-base pair recombination rate,  $r$ , is varied as a fraction of mutation rate,  $\mu$ , and indicated by colors – Green:  $r = \mu * .01$ ; Orange:  $r = \mu * .1$ ; Blue:  $r = \mu$ ; Magenta:  $r = \mu * 10$



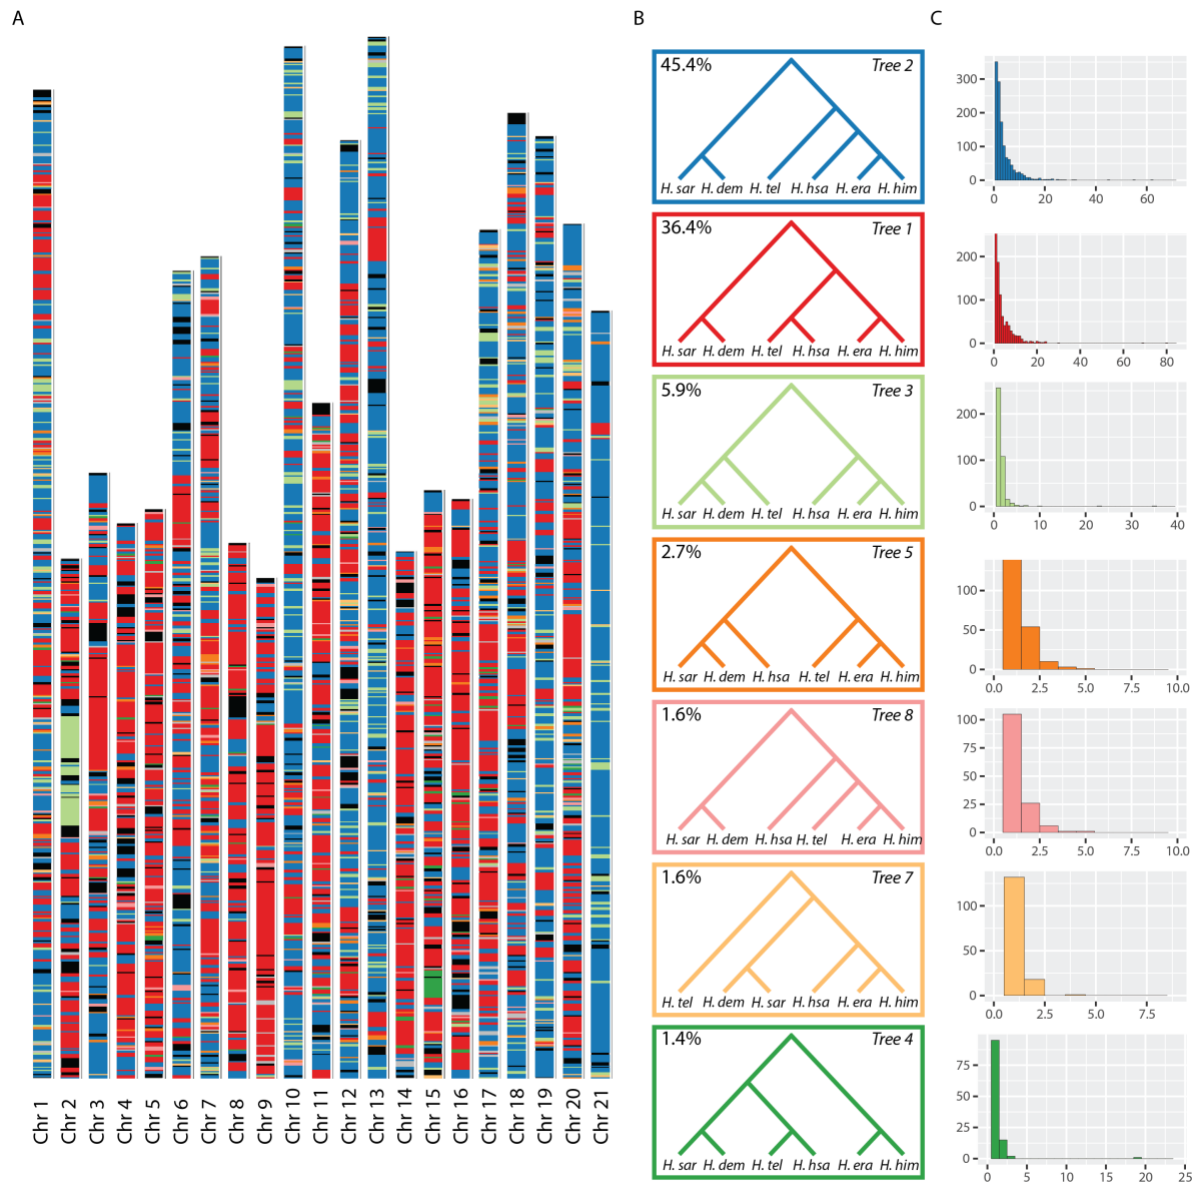

**Fig. S77 Heterogeneity of *erato-sara* clade evolutionary history across the *H. melpomene* genome**

**A. Distribution of topologies across the genome.** For each 50 kb window, the colored bar represents the topology recovered from that region. Colors correspond to topologies in **B**. Coordinates are in terms of the *H. melpomene* Hmel2.5 reference, and topologies for all windows were reconstructed with PhyML. Black regions are missing data. **B. Common topologies.** The eight most common phylogenies are shown. The value in the top left corner of each topology is the percentage of all 50 kb windows that recovers that topology. The tree labels correspond to those in the main text Fig. 2B **C. Tree block length distribution** Each histogram corresponds to the topology of the same color in **B** and shows the distribution of the number of consecutive 50 kb windows that recover that topology.

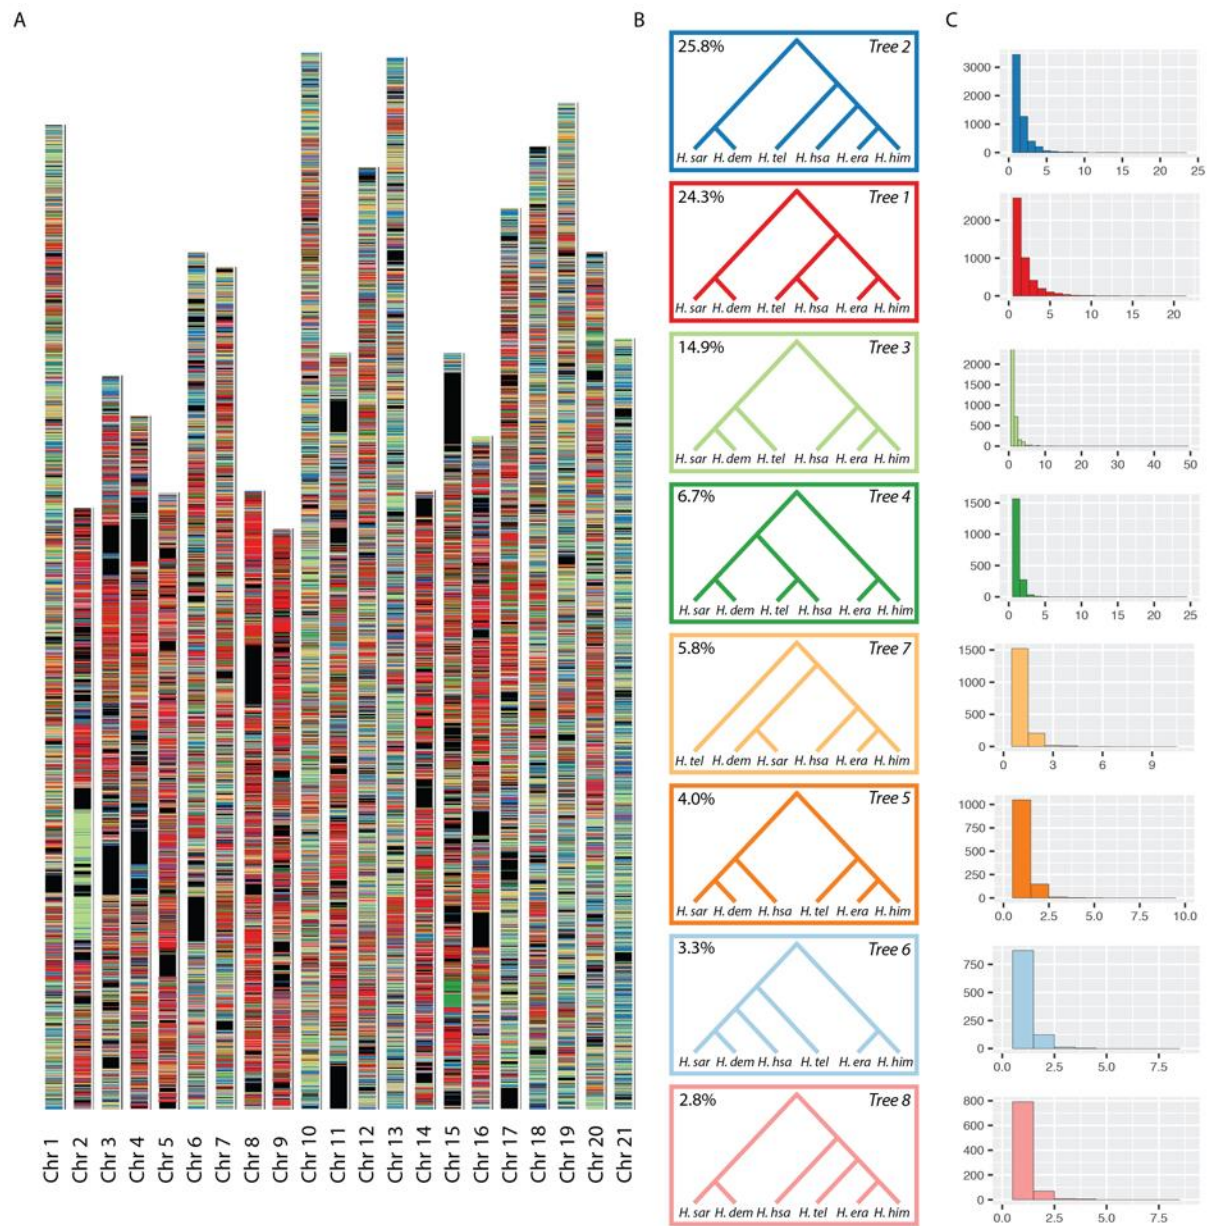

**Fig. S78 Heterogeneity of evolutionary history across the *erato* genome, 10 kb windows**

For each 10 kb window, the colored bar represents the topology recovered from that region. Colors correspond to topologies in B. Coordinates are in terms of the *H. erato* demopoon v1 reference, and topologies for all windows were constructed with PhyML. Black regions are missing data. B. Common topologies. The eight most common phylogenies are shown. The value in the top left corner of each topology is the percentage of all 10 kb windows that recover that topology. The tree labels correspond to those in the main text Fig. 2B. C. Tree block length distribution. Each histogram corresponds to the topology of the same color in B and shows the distribution of the number of consecutive 10 kb windows that recover that topology.

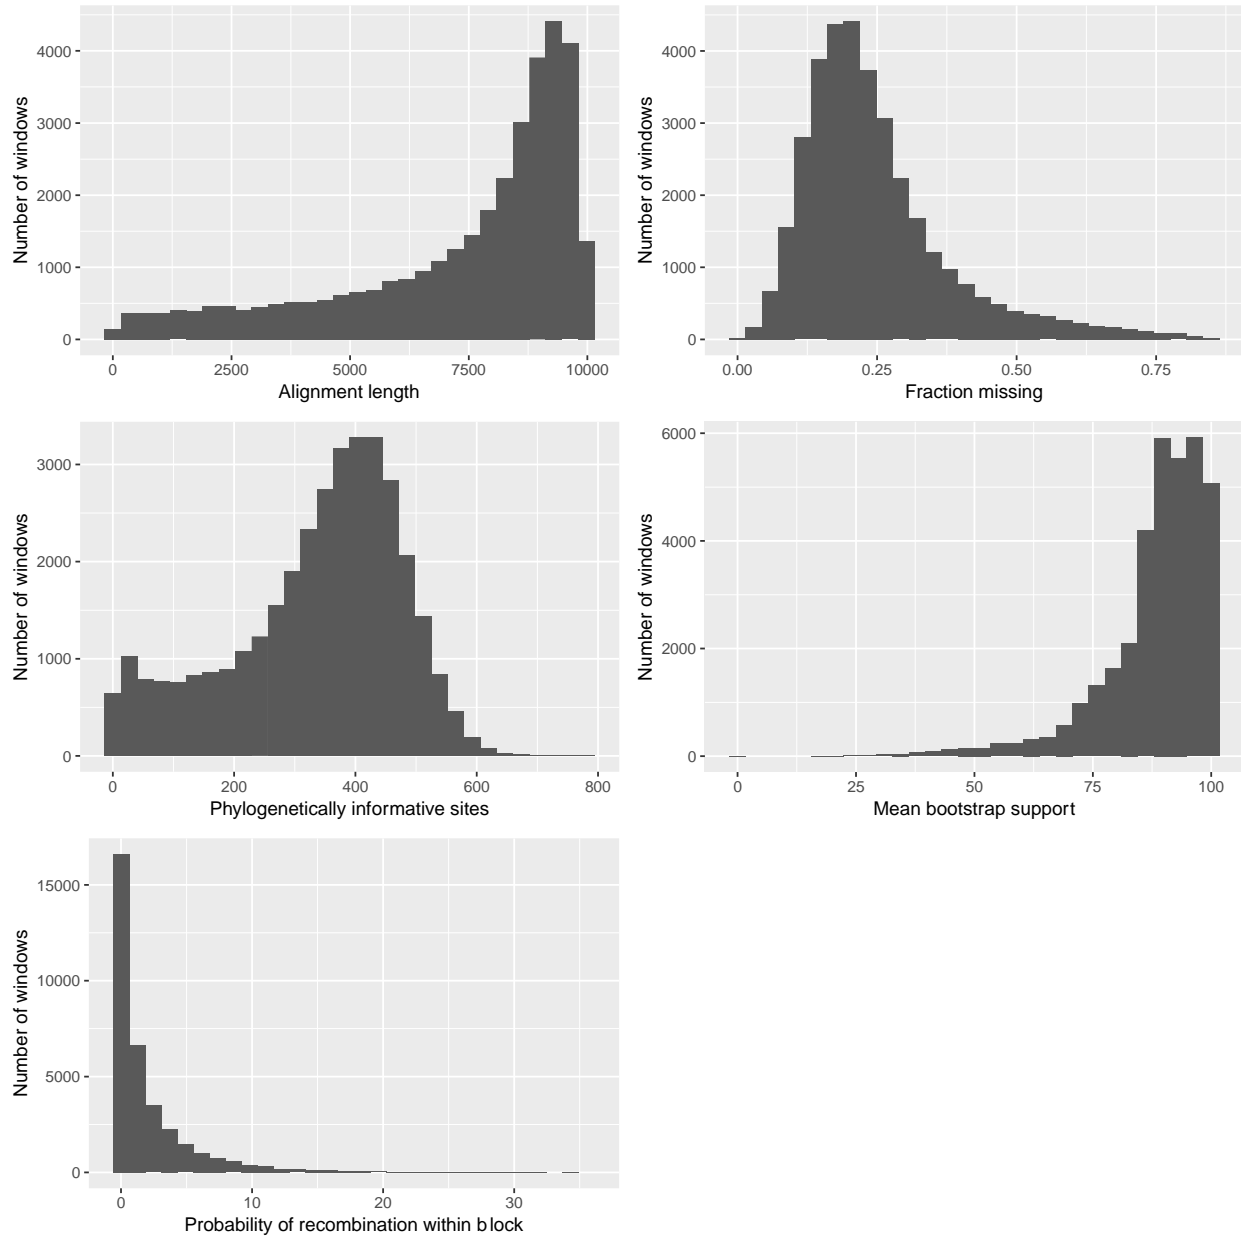

**Fig. S79 Basic alignment statistics**

*Distributions of basic alignment statistics are shown for 10 kb windows of erato clade alignments. Only windows with Alignment length >2000 bp were included. Statistics are as defined in Fig. S24*

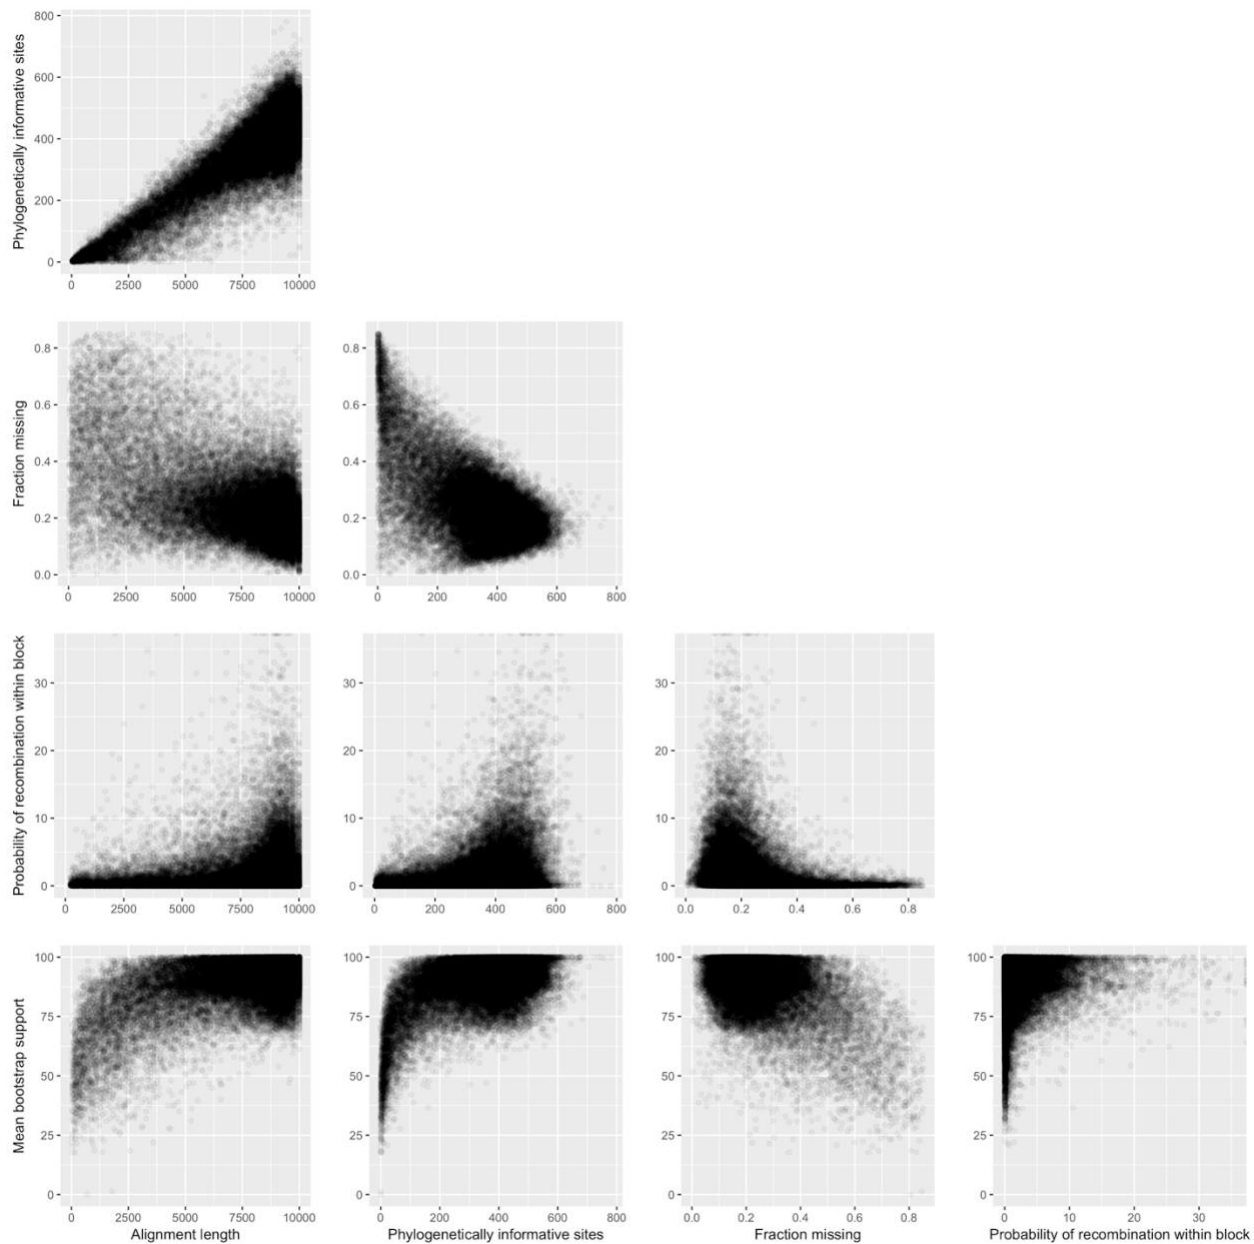

**Fig. S80 Correlation between statistics**

*Pairwise correlations between all statistics shown in Fig. S79*

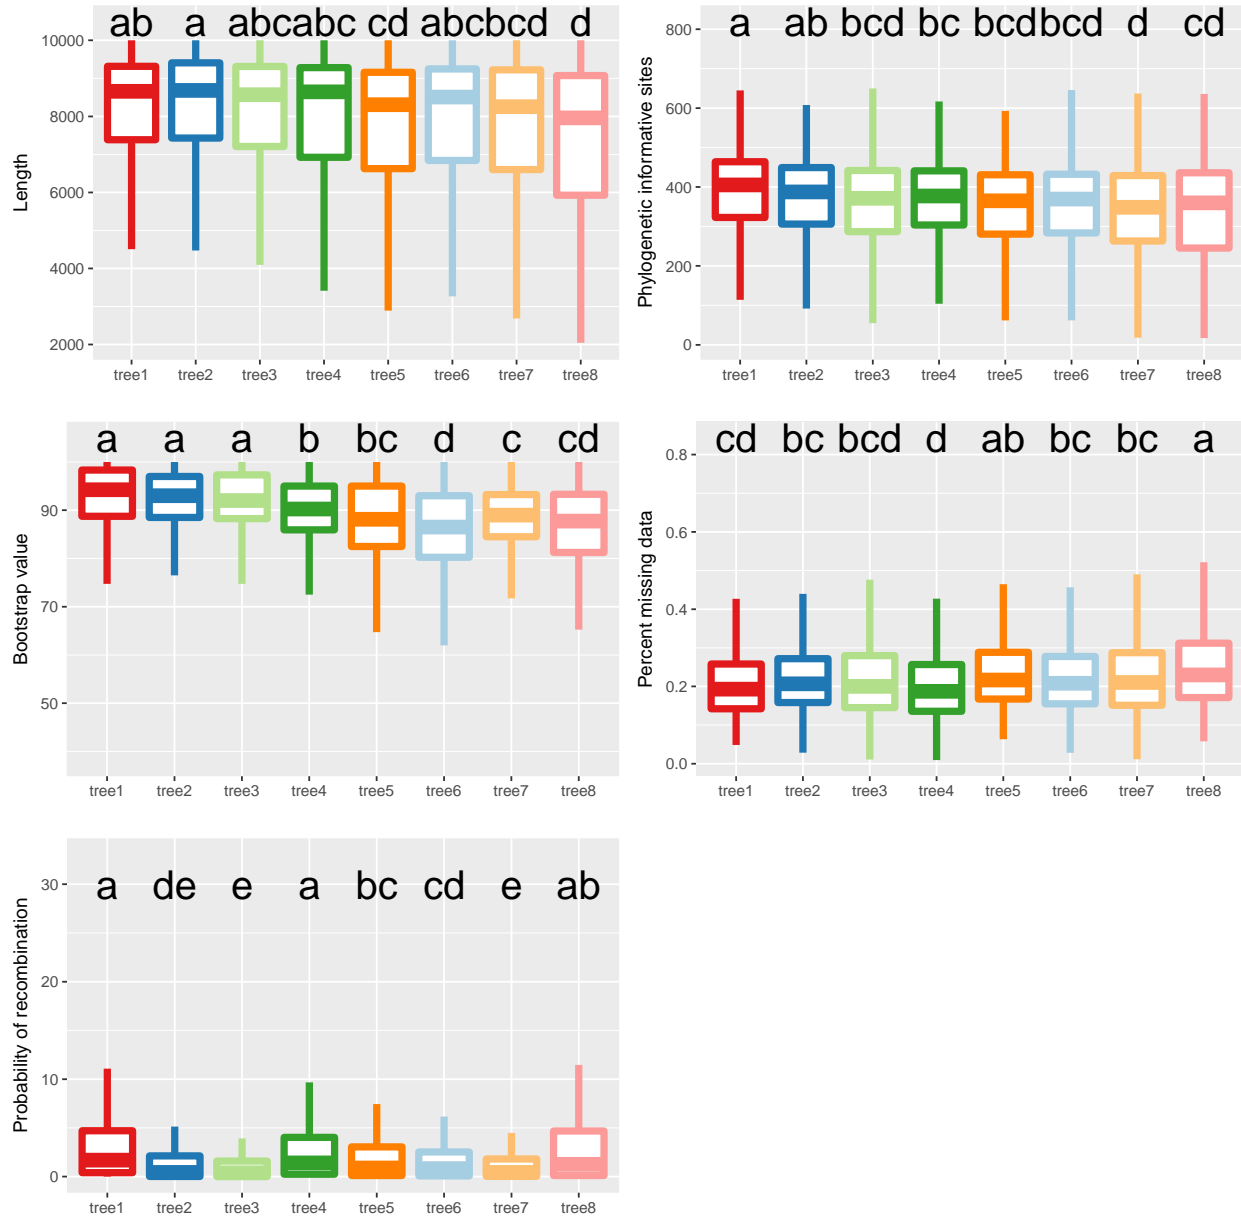

**Fig. S81 Alignment statistics by tree topology**

*Windows were subsampled from each topology to that the number of windows from each was equal. Letters above bars indicate significance based on a Kruskal-Wallis test, using a Bonferroni correction for multiple comparisons. Statistics are as defined in Fig. S24*

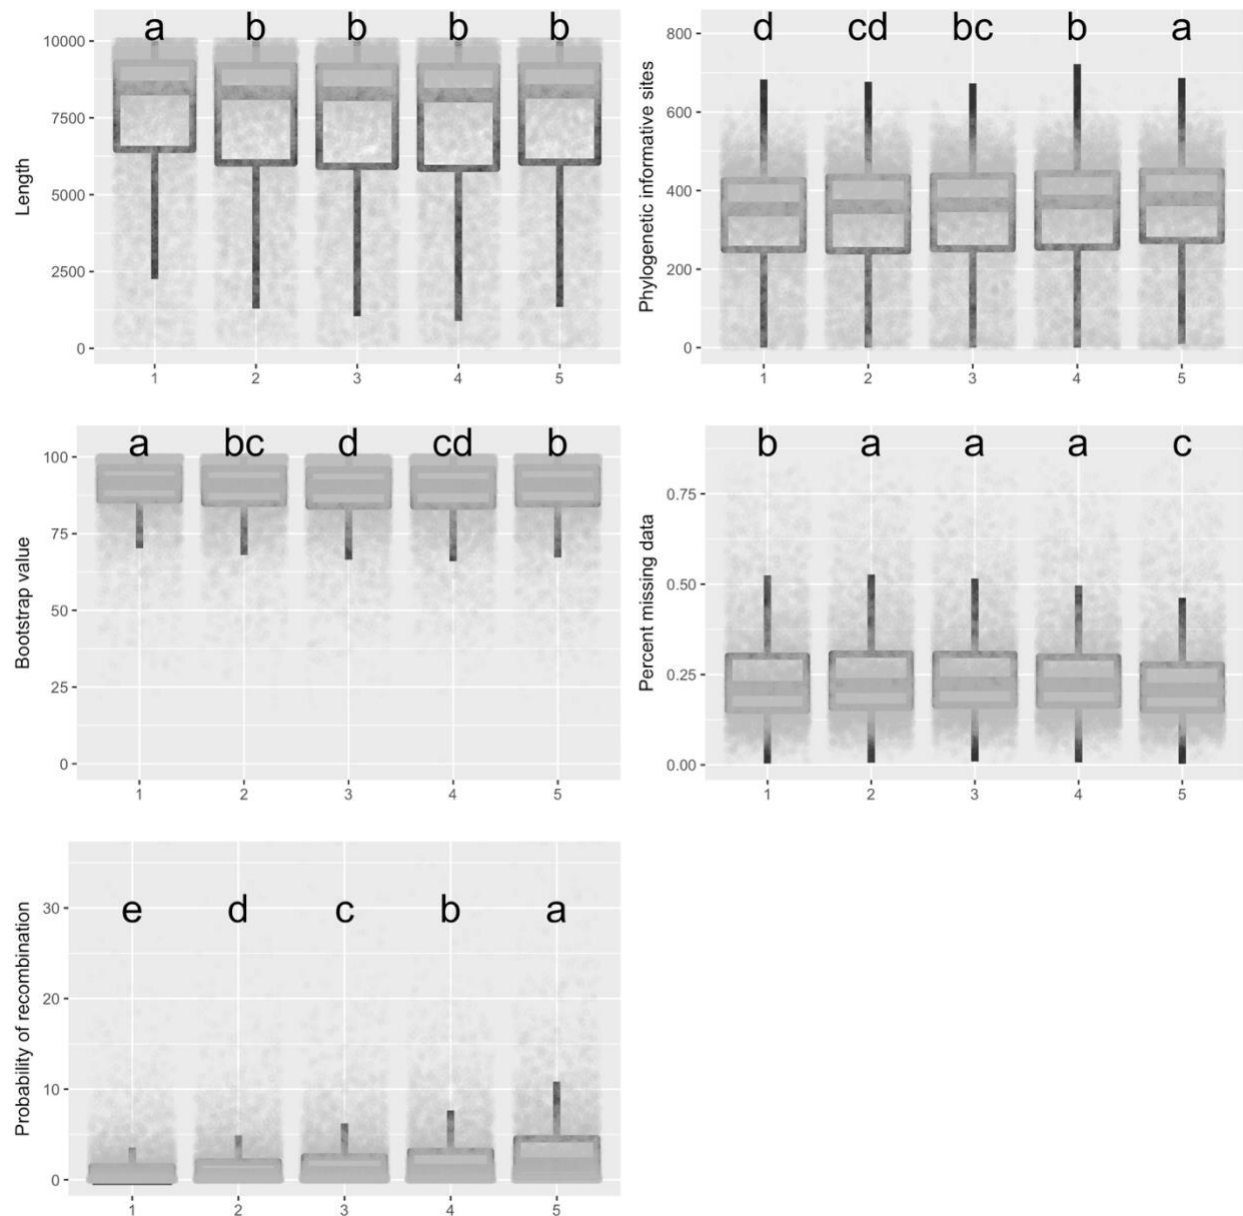

**Fig. S82 Alignment statistics by recombination rate quintile**

*Letters above bars indicate significance based on a Kruskal-Wallis test, using a Bonferroni correction for multiple comparisons. Statistics are as defined in Fig. S24*

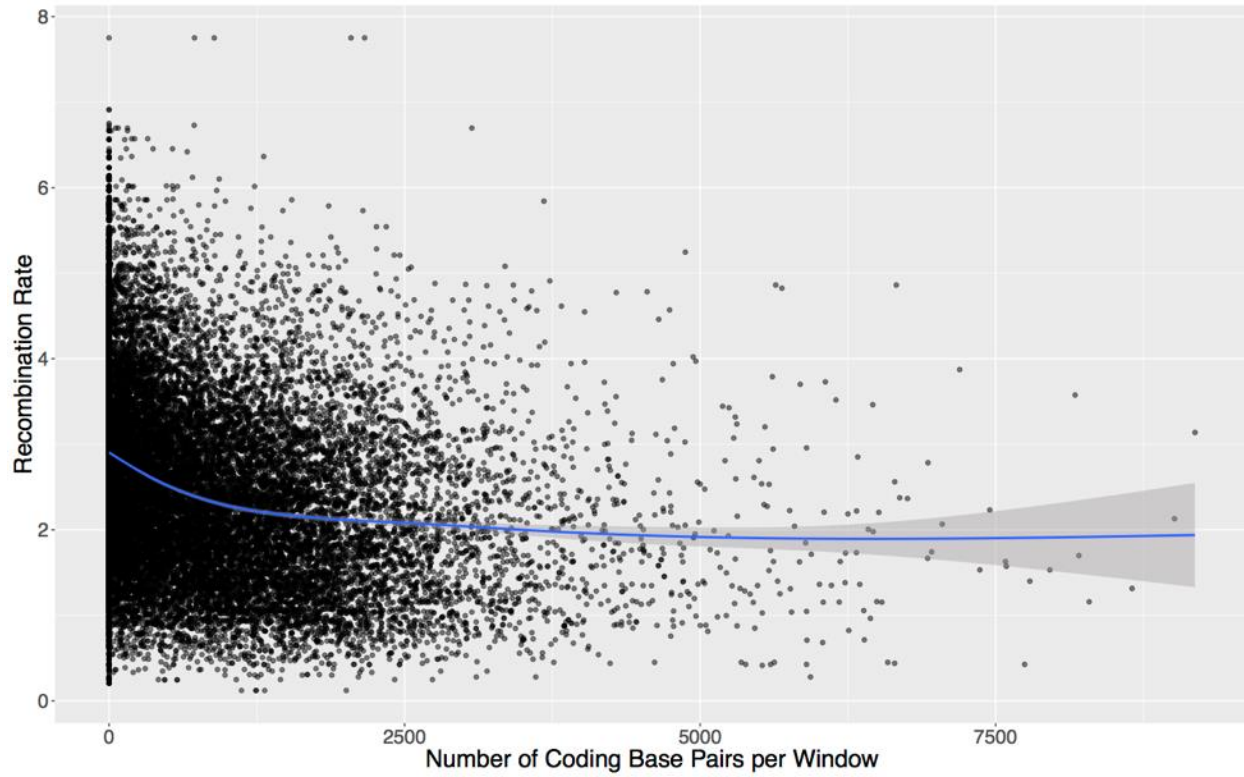

**Fig. S83 Relationship of recombination rate to number of coding base pairs per window**

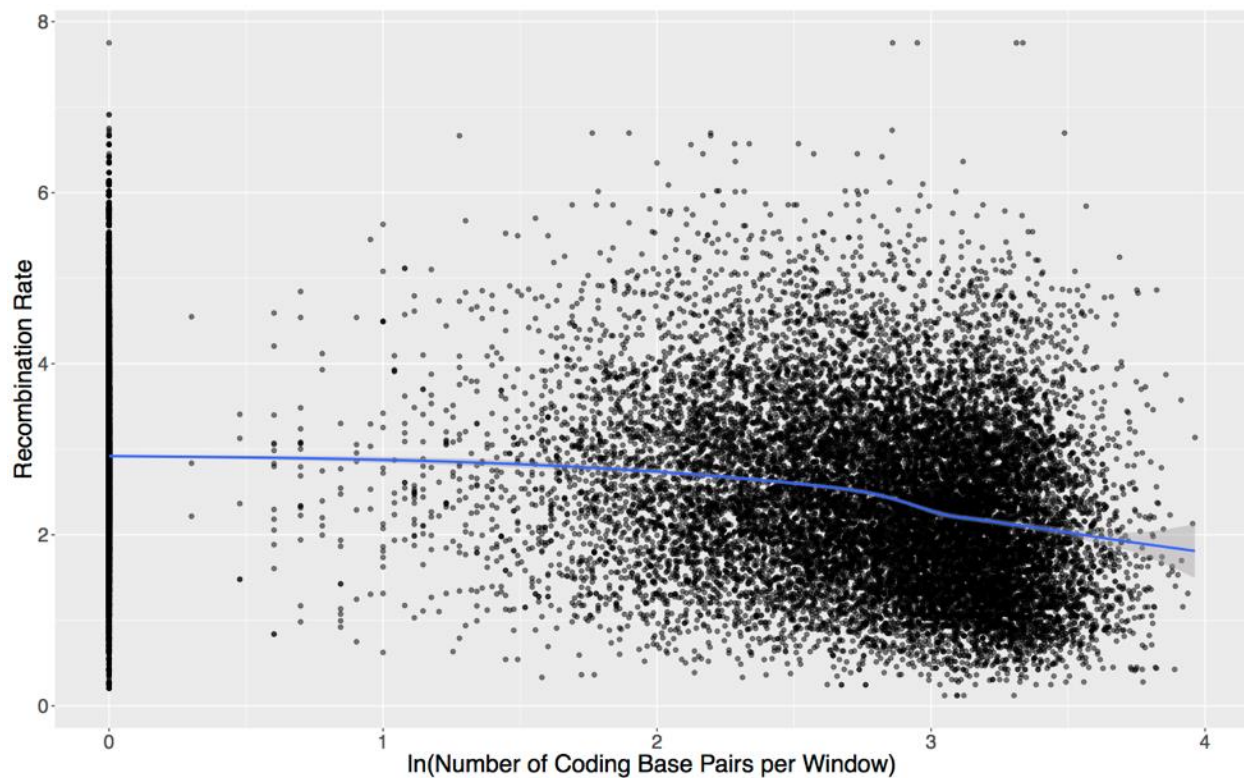

**Fig. S84 Relationship of recombination rate to log number of coding base pairs per window**



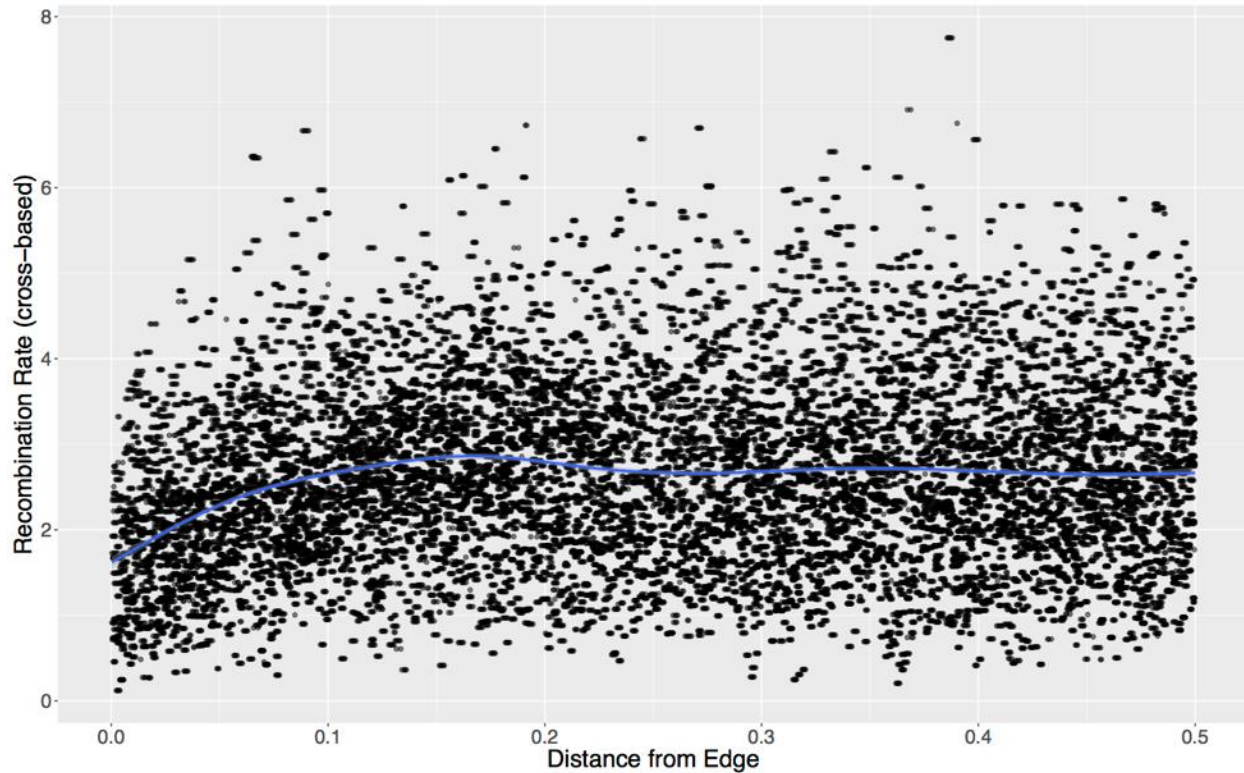

**Fig. S85 Relationship of chromosomal position to recombination rate in *H. erato***

*Local recombination rates for the *H. erato* demophon genome were calculated in 50 kb windows. Because topologies in this study were reconstructed in 10 kb windows, adjacent windows often share the same recombination rate estimate.*

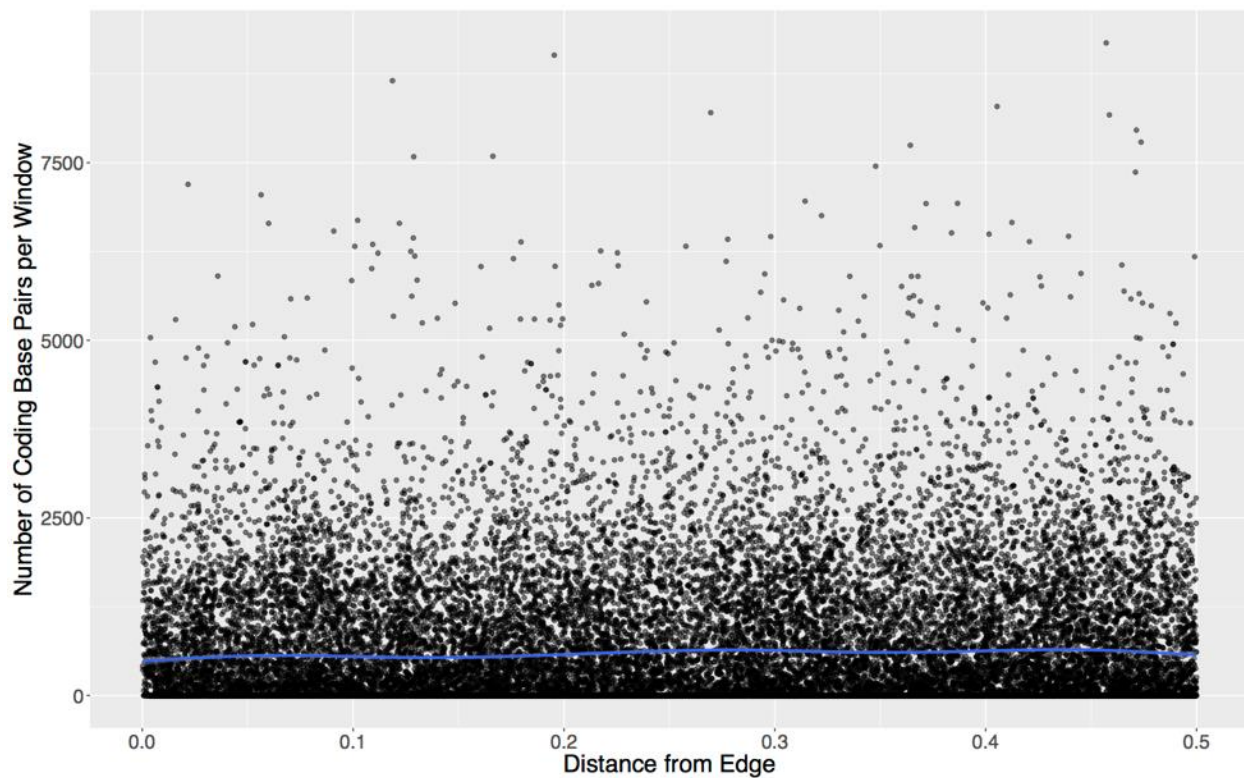

**Fig. S86 Relationship of chromosomal position to number of coding bases per window**

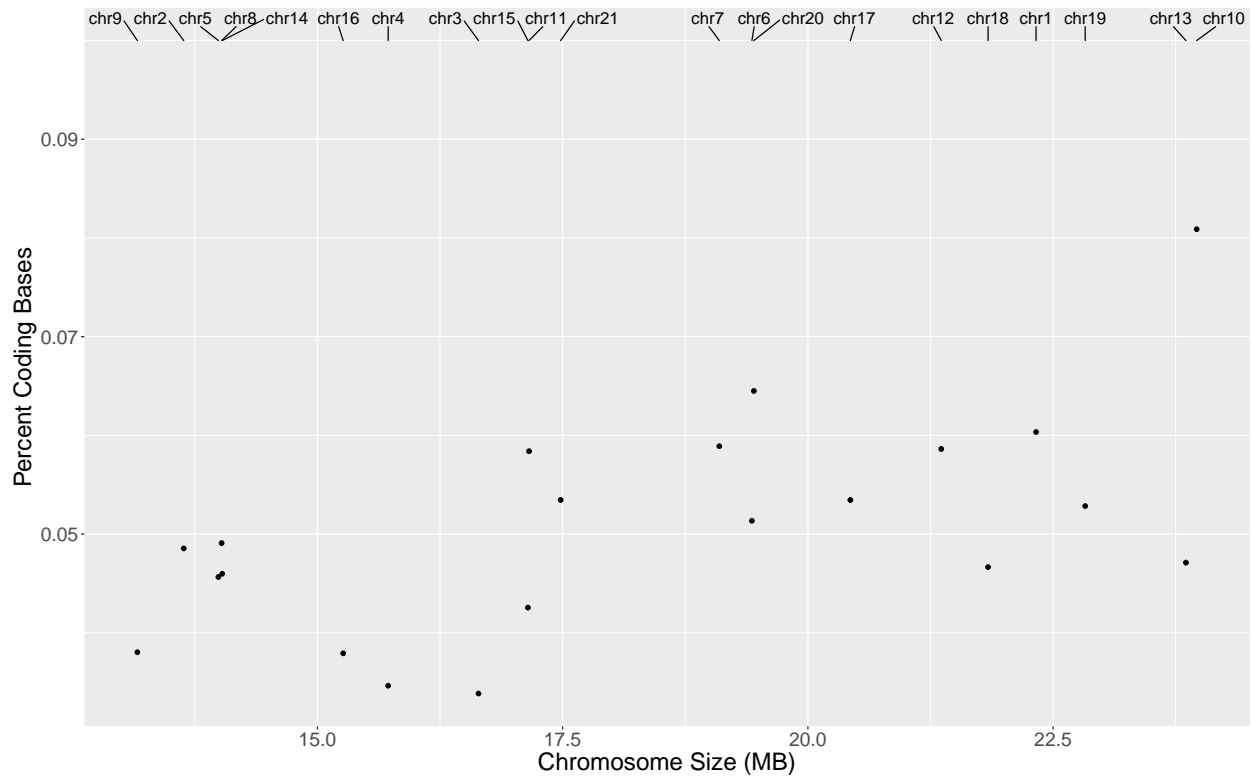

**Fig. S87 Relationship of chromosome size in *H. erato* to fraction of coding bases**

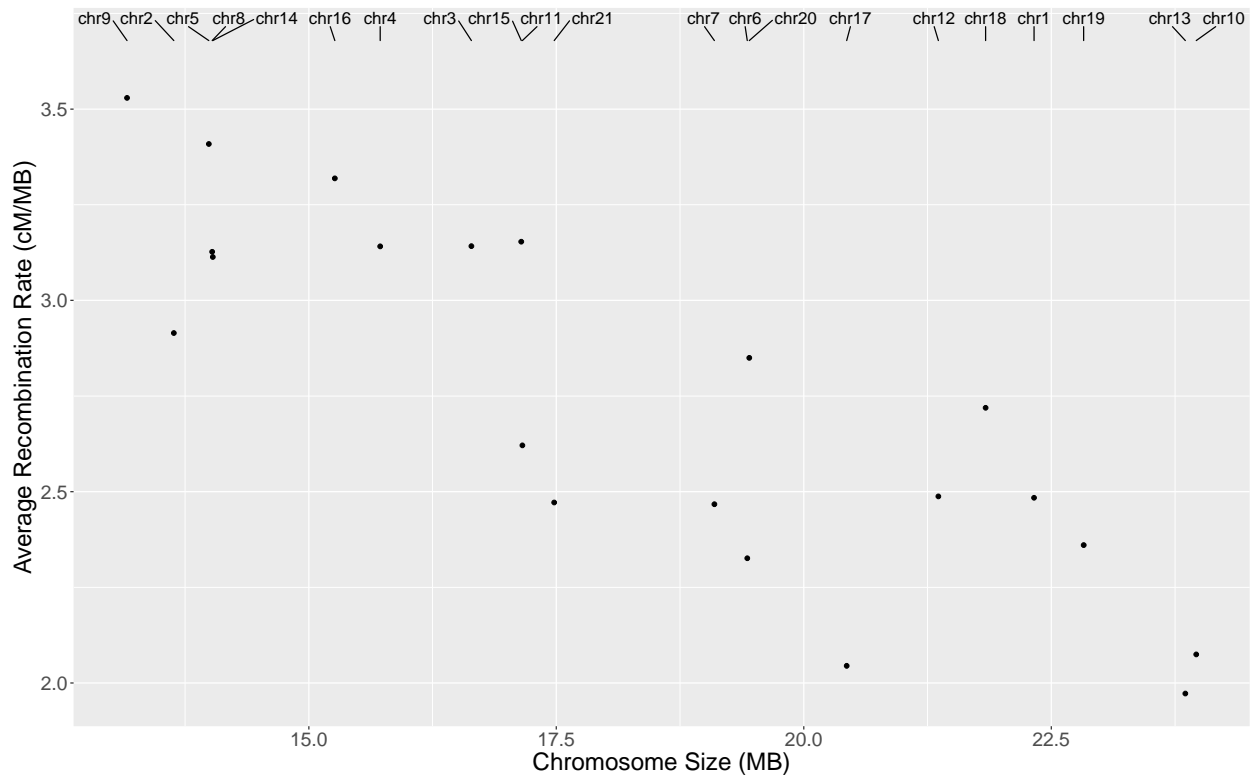

**Fig. S88 Relationship of chromosome size to average recombination rate in *H. erato***

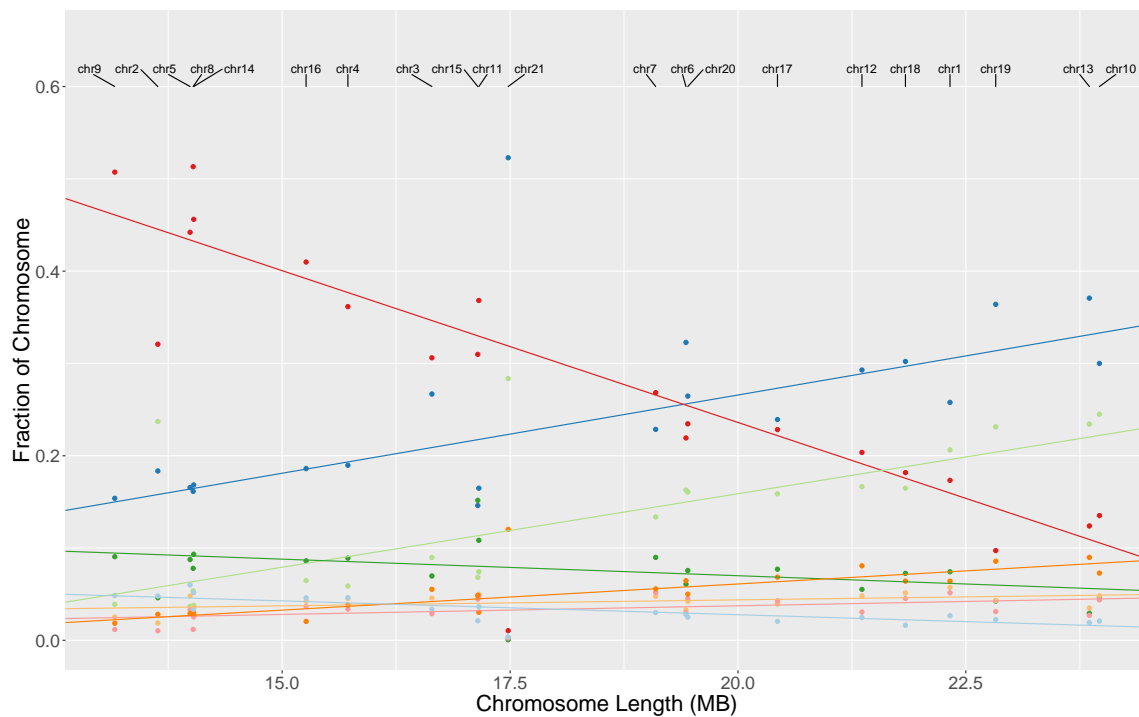

**Fig. S89 Relationship of topology fraction to chromosome length in *H. erato*.**

*Colors as in Fig. S77 and Fig. S78. Trees were reconstructed from 10 kb abutting windows.*

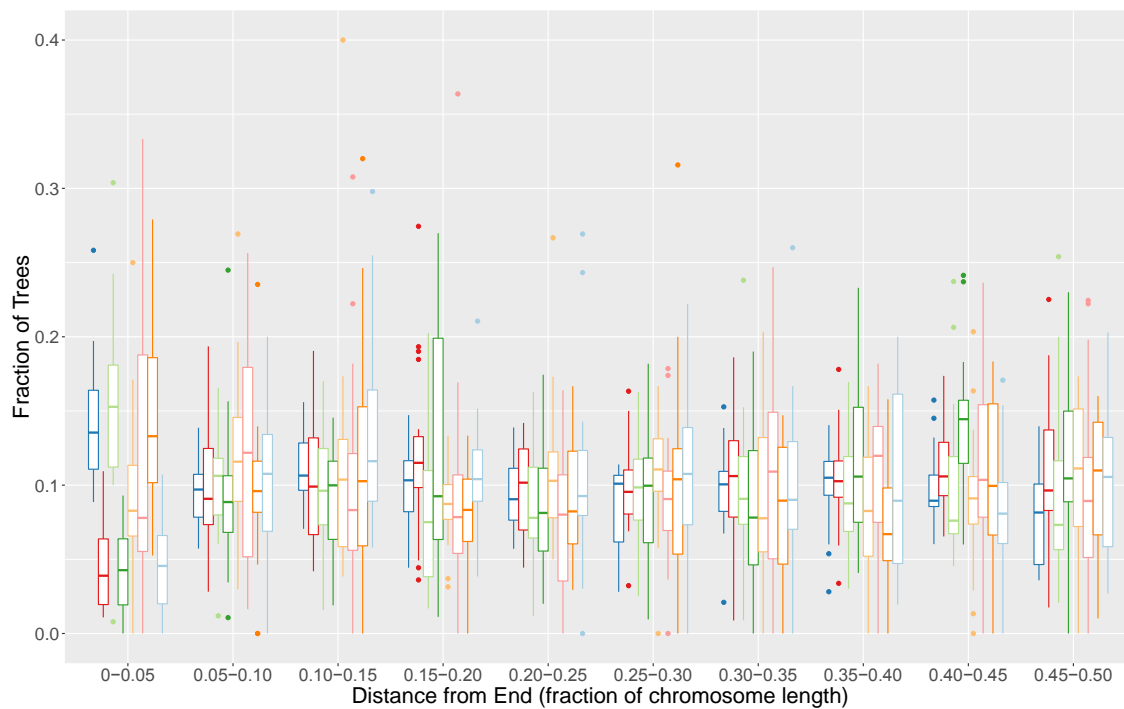

**Fig. S90 Relationship of topology to *H. erato* chromosomal position, per tree**

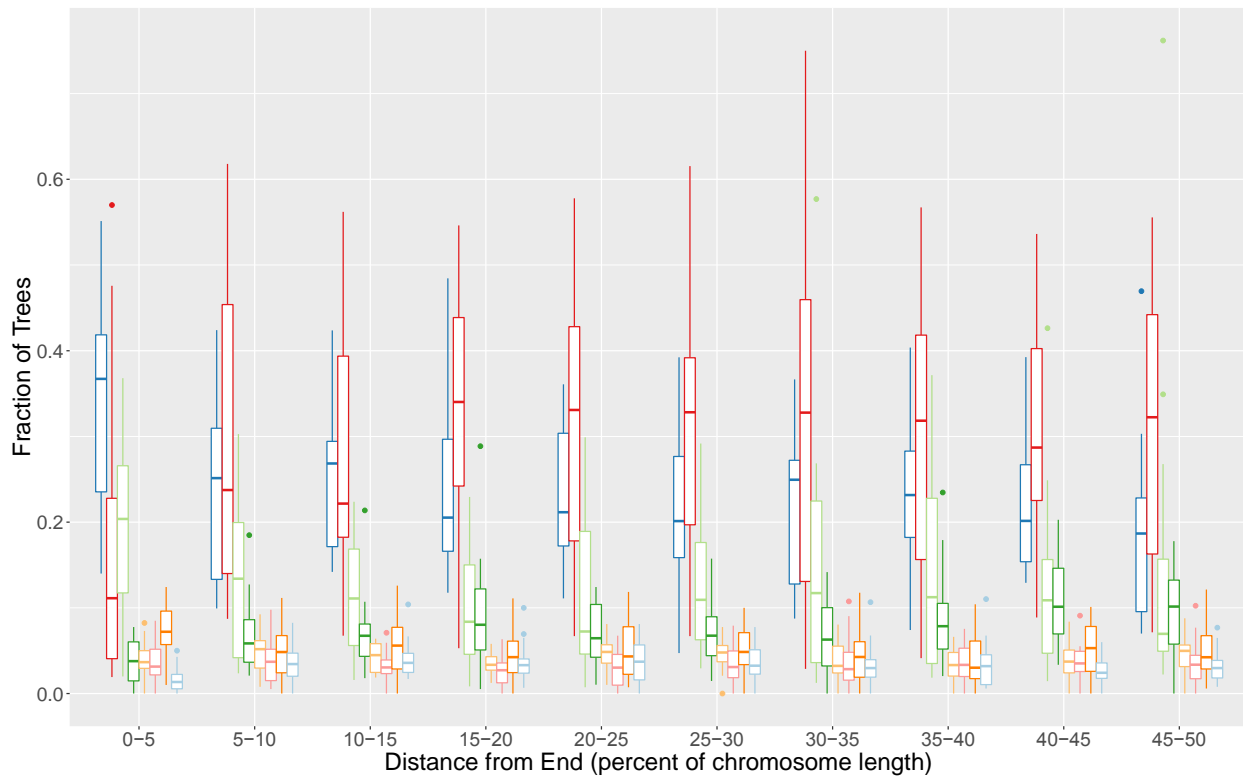

**Fig. S91 Relationship of topology to *H. erato* chromosomal position, per position bin**

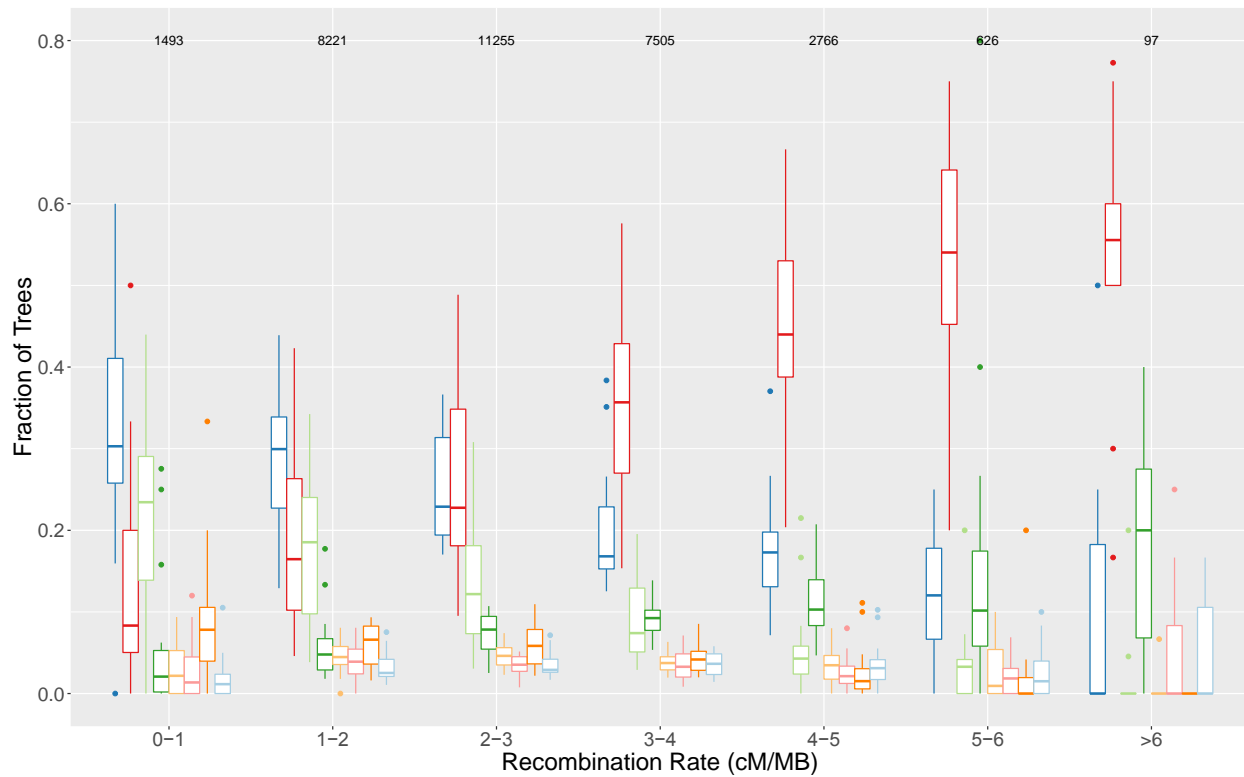

**Fig. S92 Relationship of topology to local recombination rate in *H. erato***



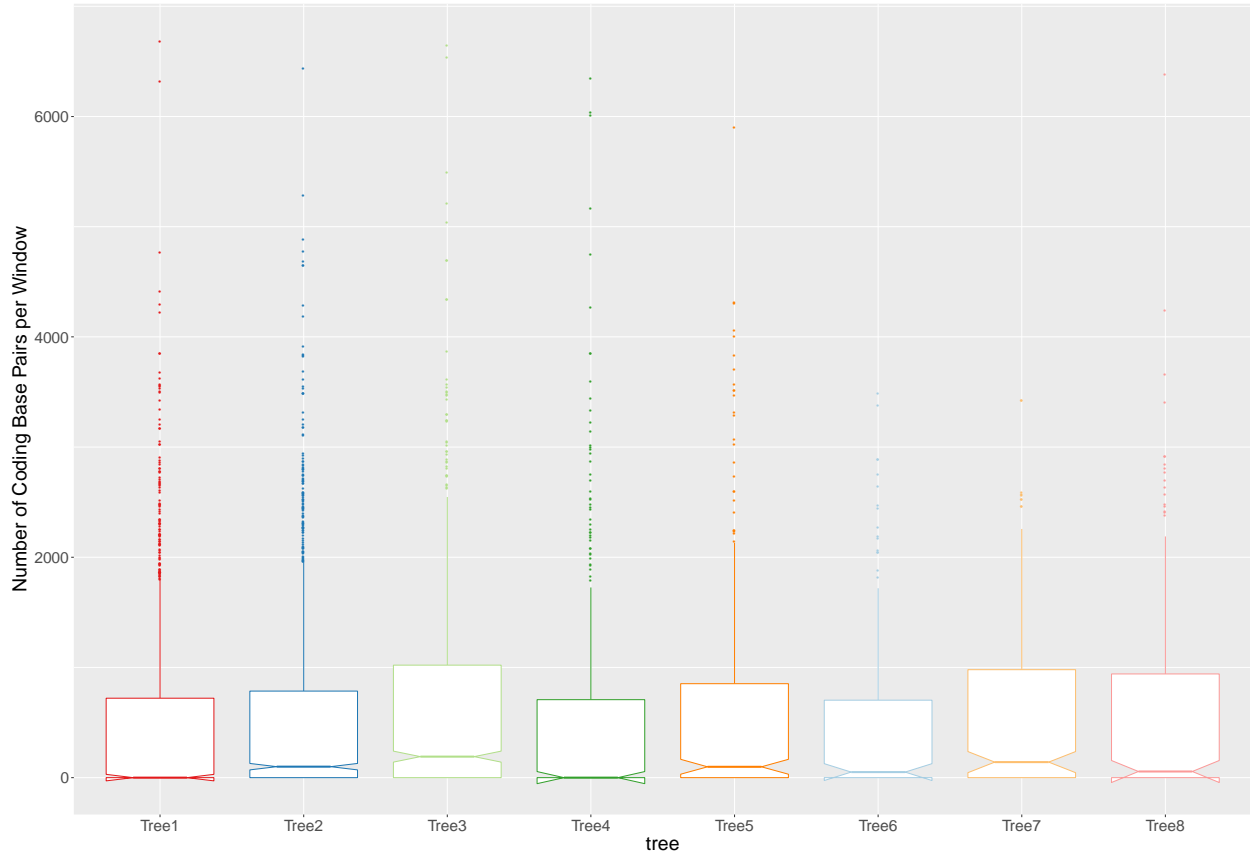

**Fig. S93 Relationship of topology to number of coding base pairs per window**

Central lines show median number of coding bases per window that recovers given topology. Box edges correspond to the inter-quartile range (IQR), and the minimum value they can take is 0. The notches represent  $1.58 * \frac{IQR}{\sqrt{n}}$ , and can therefore take values less than zero as seen in Trees 1, 4, 6, and 8. Tree labels correspond to those in main text Fig. 2B.

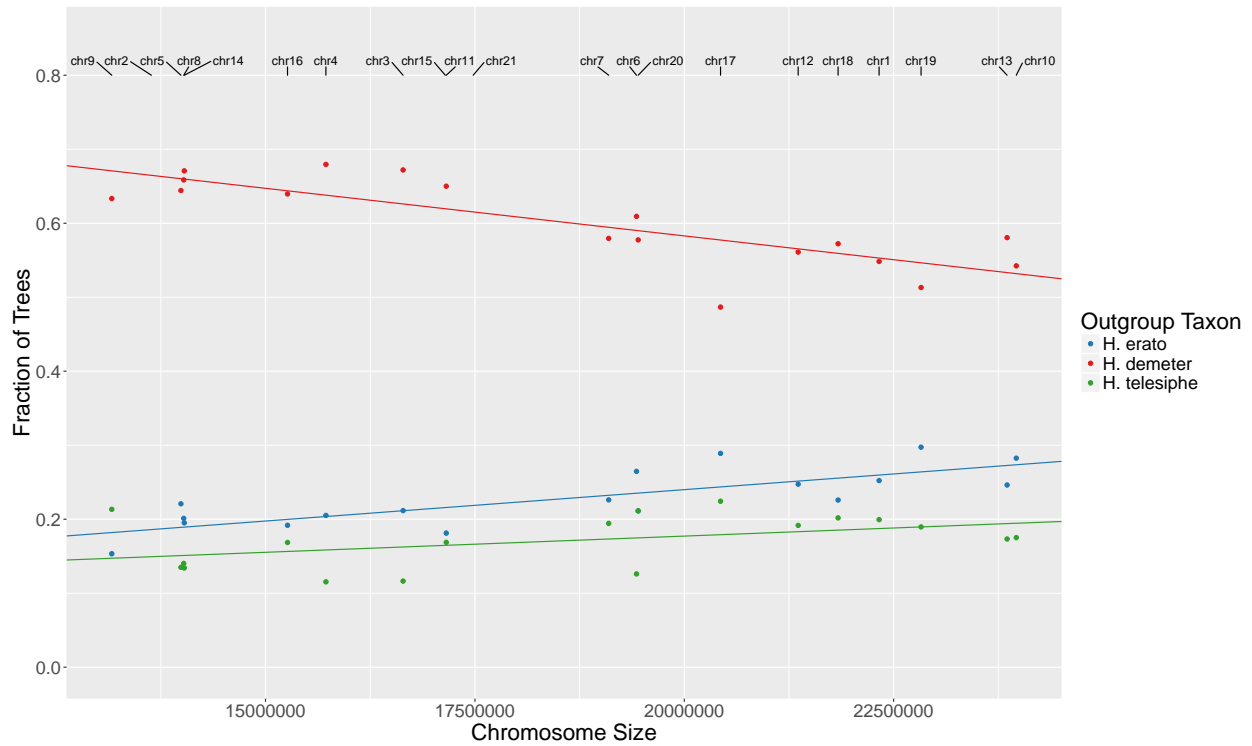

**Fig. S94 Relationships of triplet topologies with chromosome length in *H. erato* clade.**

*The slight negative correlation of the expected species tree (red) in this triplet might be interpreted as evidence that *H. telesiphe* is sister to *H. demeter* and *H. sara*, since it goes against the prevailing evidence with the full tree data (main text Fig. 2 Tree 2, and Fig.3A) Trees were reconstructed from 10 kb abutting windows.*

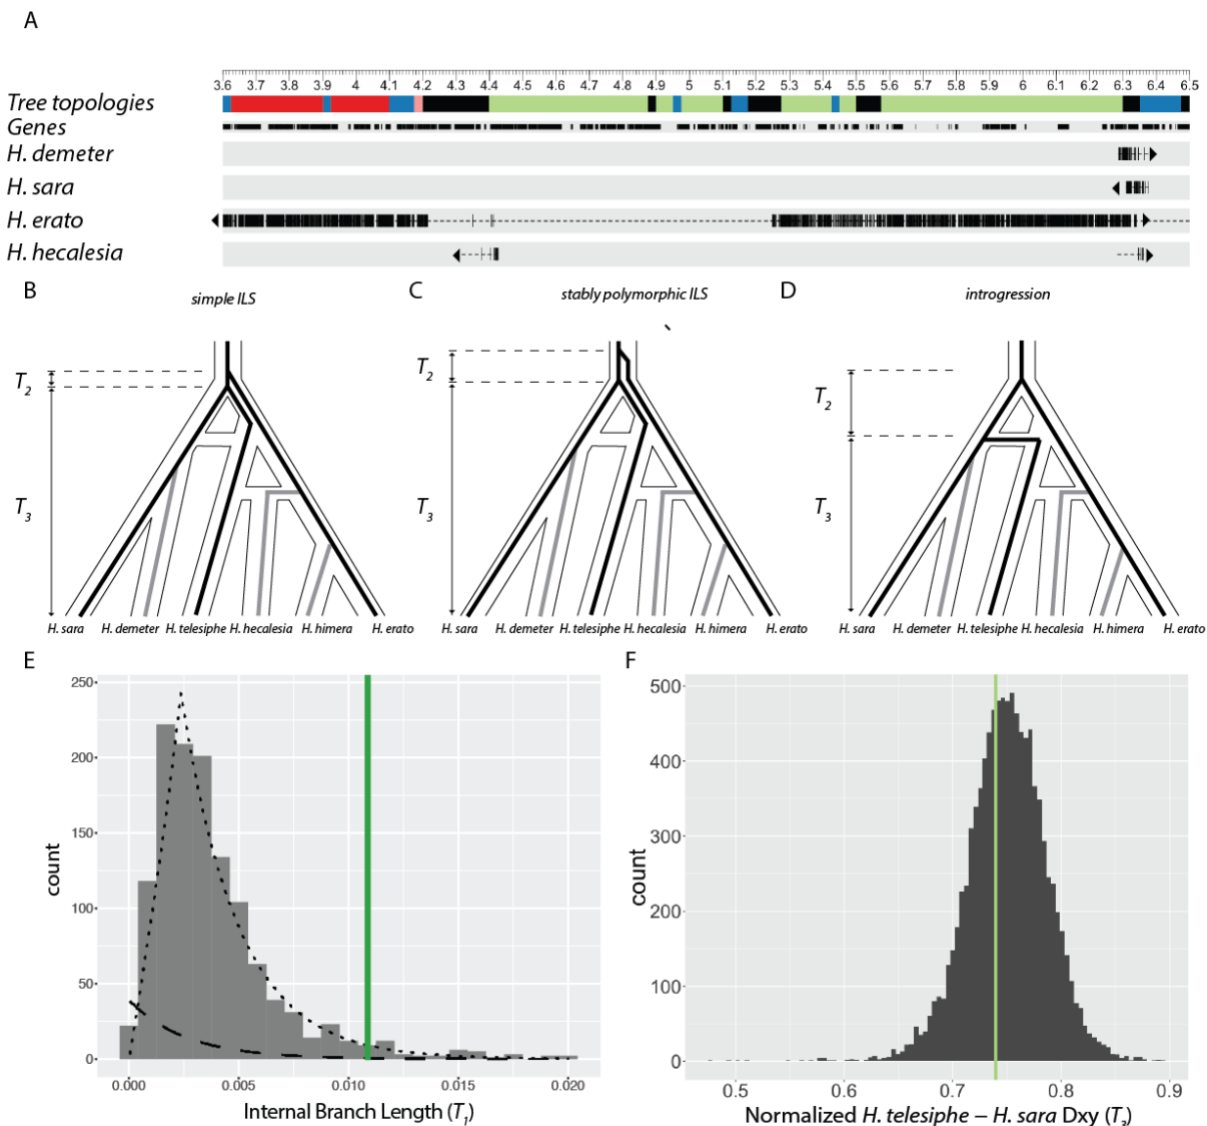

**Fig. S95 An inversion on chromosome 2.**

**A.** Map of 3 Mb region on chromosome 2. Coordinates are in terms of the Hmel 2.5 reference order, and ticks are in Mb. Colors correspond to those in Fig. 2B. Genes are shown as black rectangles. Each line below shows the mapping of a single scaffold. Aligned sections of each scaffold are shown as thick bars, while unaligned sections are shown as dotted lines to indicate the relative position of the alignment within the scaffold. Only regions that were not identified as multiple-copy or repetitive are shown. Arrows indicate direction of alignment. **B-D.** Hypothetical evolutionary histories. In all cases, the histories of the three species used in the "triplet gene tree" method – *H. erato*, *H. telesiphe*, and *H. sara* – are shown as black lines, while lineages not included are shown as grey lines. **B** shows the scenario expected in the case of simple ILS. **C** shows another scenario of ILS, but in this case the inversion is polymorphic for some time in the common ancestor, leading to a longer internal branch for the inversion. **D** shows the case of introgression from the *H. sara*+*H. demeter* ancestor into the *H. telesiphe*+*H. hecalesia* ancestor. **E.** Distribution of internal branch lengths. Histogram is of internal branch lengths ( $T_2$ ) in the *H.*

erato,(H. telesiphe, H. sara) topology. The inferred ILS distribution is shown as a dashed line, and the inferred introgression distribution is shown as a dotted line. The average internal branch length in the inversion is shown as a green vertical line. **F. Normalized H. telesiphe-H. sara  $D_{XY}$ .** Normalized  $D_{XY}$  ( $T_3$ ) is calculated as H. telesiphe-H. sara  $D_{XY}$  divided by the mean pairwise  $D_{XY}$  among all species in each region. Mean normalized  $D_{XY}$  in the inversion is shown as a green vertical line.

Table S1: Sample info. This table provides basic information about each individual sequenced.

| BROAD ID | Species              | Subspecies              | Labeled Sex | Sequenced Z?          | Supplier                     | Supplier ID                            | Extraction method | Tissue                                 | Field/Lab/Inbred            | Site of origin                            | Karyotype, n (Brown 1982 & since) |
|----------|----------------------|-------------------------|-------------|-----------------------|------------------------------|----------------------------------------|-------------------|----------------------------------------|-----------------------------|-------------------------------------------|-----------------------------------|
| SM-585JW | H. himera            | linorasi                | F           | Y                     | Davey/Jiggins/Salas          | D1, RPI_2013_04                        | Qiagen Magtract   | Whole thorax                           | Inbred Lab                  | Colombia                                  | 21                                |
| SM-62OYT | H. cydno             | chionus                 | F           | Y                     | Davey/Jiggins/Merrill        | D2, Merrill RNAIater 67, insectary 723 | Qiagen Magtract   | 1/4 thorax + proximal third of abdomen | Field (Parent of lab cross) | Panama                                    | 21                                |
| SM-62OYS | H. hecale            | styxphus                | F           | N, replaced           | Davey/Jiggins/Ioron/Chouteau | D3, MC13-103                           | Qiagen Magtract   | larva whole body                       | Inbred F3                   | Peru: Madre de Dios: Los Amigos Res. Sta. | 21                                |
| SM-585Y  | H. numata            | staedigeri              | F           | Y                     | Davey/Jiggins/Ioron/Chouteau | D4, MC13-99                            | Qiagen Magtract   | antennae, brain and proximal abdomen   | Inbred F3                   | Peru: Loreto: Shuchiyacu                  | 21                                |
| SM-585JX | H. melpomene         | melpomene               | F           | Y                     | Davey/Jiggins/Ioron          | D5                                     | Qiagen Magtract   | Proximal half of abdomen               | Inbred F4, Genome strain    | Panama                                    | 21                                |
| SM-605JP | H. himera x H. erato | F1 interspecific hybrid | M           | Y                     | McMillan                     | 6700                                   | Qiagen DNeasy     | thorax                                 | Lab hybrid                  | F3 hybrid                                 | 21                                |
| SM-605JQ | H. himera            | father                  | M           | N, replaced           | McMillan                     | 6363                                   | Qiagen DNeasy     | 1/2 thorax                             | Inbred                      | Ecuador                                   | 21                                |
| SM-605JR | H. erato             | Mother                  | F           | Y                     | McMillan                     | 6394                                   | Qiagen DNeasy     | 1/2 thorax                             | Inbred                      | Panama                                    | 21                                |
| SM-605JQ | H. donis             | viridis                 | M           | Y                     | McMillan                     | 6897                                   | Qiagen DNeasy     | thorax                                 | Lab raised                  | Panama                                    | 19-32                             |
| SM-605JN | A. vanillae          | vanillae                | M           | Y                     | Reed                         | none                                   | Qiagen DNeasy     | thorax                                 | Purchased lab stock         | USA                                       | 31                                |
| SM-585JR | H. besckei           |                         | M           | Y                     | Moreira/Dasmahapatra         | 110-111                                | Qiagen Magtract   | thorax                                 | Field                       | SE Brazil                                 | 21                                |
| SM-585JS | H. sode              | cupidineus              | F           | Y, cross-contaminated | Dasmahapatra                 | 09-282                                 | Qiagen Magtract   | thorax                                 | Field                       | Peru                                      | 21-23                             |
| SM-585JT | E. tates             | michael                 | F           | Y                     | Dasmahapatra                 | 09-322                                 | Qiagen Magtract   | thorax                                 | Field                       | Peru                                      | 31                                |
| SM-585JU | H. telesiphe         | telesiphe               | M           | Y, cross-contaminated | Dasmahapatra                 | 09-229                                 | Qiagen Magtract   | thorax                                 | Field                       | Peru                                      | 21                                |
| SM-605KN | H. parbalinus        |                         | F           | Y                     | Dasmahapatra                 | RL13-139                               | Qiagen Magtract   | thorax                                 | Inbred, sib x sib offspring | Peru                                      | 21                                |
| SM-605KO | H. burneyi           |                         | M           | Y                     | Dasmahapatra                 | 09-93                                  | Qiagen Magtract   | thorax                                 | Field                       | Peru                                      | 21                                |
| SM-605KP | H. demeter           |                         | F           | Y                     | Dasmahapatra                 | 09-323                                 | Qiagen Magtract   | thorax                                 | Field                       | Peru                                      | 21                                |
| SM-585JV | H. abrotus           |                         | F           | Y                     | Dasmahapatra                 | 6846                                   | Qiagen Magtract   | thorax                                 | Lab                         | Peru                                      | 21                                |
| SM-793F2 | H. himera            |                         | M           | N, 2015 replacement   | McMillan                     | 6900                                   | Qiagen Magtract   | thorax                                 | Inbred                      | Ecuador                                   | 21                                |
| SM-793F3 | H. hecale            |                         | F           | N, 2015 replacement   | McMillan/Ioron/Chouteau      | 7203                                   | Qiagen Magtract   | thorax                                 | field                       | Peru                                      | 21                                |
| SM-ADRBN | H. lala              | magdalena               | M           | N, 2016 addition      | Jiggins                      | CAM003802                              | Qiagen DNeasy     | thorax                                 | lab, inbred                 | Panama                                    | 21                                |
| SM-ADRBM | H. hecale            | formosus                | F           | N, 2016 addition      | Jiggins                      | CAM002492                              | Qiagen DNeasy     | thorax                                 | field                       | Panama                                    | 21                                |
| SM-ADRBQ | H. telesiphe         | telesiphe               | M           | N, 2016, replacement  | Dasmahapatra                 | 11-919                                 | Qiagen Magtract   | thorax                                 | field                       | Peru                                      | 21                                |
| SM-ADRBP | D. lala              |                         | F           | N, 2016 addition      | Dasmahapatra                 | 11-759                                 | Qiagen Magtract   | thorax                                 | field                       | Peru                                      | 31                                |

**Table S2: Assembly Statistics.** This table provides metrics for each stage of the assembly pipeline.

| Sample                   | Taxon                        | Initial contigs |        |       |       |       |               |               |        |       |       | Filtered contigs |             |         |        |       |       |       |             |        |        | Scaffolds soap |        |        |             |      |    |        |             |      |     | Scaffolds modified soap |           |               |  |  |  |  |  |  |  |
|--------------------------|------------------------------|-----------------|--------|-------|-------|-------|---------------|---------------|--------|-------|-------|------------------|-------------|---------|--------|-------|-------|-------|-------------|--------|--------|----------------|--------|--------|-------------|------|----|--------|-------------|------|-----|-------------------------|-----------|---------------|--|--|--|--|--|--|--|
|                          |                              | n               | n500   | N50   | N50   | N50   | n20           | Total Contain | n      | n500  | N50   | N50              | n20         | sum     | n      | n500  | N50   | N50   | n20         | sum    | n      | n500           | N50    | N50    | n20         | sum  | n  | n500   | N50         | N50  | n20 | sum                     | P1:Repeat | Mean:coverage |  |  |  |  |  |  |  |
| CAM_000492               | Heliconius hecalesia         | 207020          | 7058   | 5884  | 14985 | 34541 | 543,600,000   | 148332        | 43003  | 8373  | 20205 | 43842            | 380,000,000 | 130813  | 29029  | 15285 | 36588 | 72956 | 381,500,000 | 20793  | 20793  | 28416          | 68761  | 140011 | 380,700,000 | 1937 | NA | 140011 | 380,700,000 | 1937 | NA  |                         |           |               |  |  |  |  |  |  |  |
| CAM_000802               | H. sara                      | 167549          | 61085  | 6880  | 17382 | 37362 | 495,500,000   | 115865        | 31311  | 10201 | 23661 | 46278            | 339,400,000 | 102861  | 20296  | 18596 | 43055 | 81201 | 339,500,000 | 19649  | 19649  | 18735          | 43353  | 80206  | 339,300,000 | 18   | NA | 80206  | 339,300,000 | 18   | NA  |                         |           |               |  |  |  |  |  |  |  |
| DA5_09_132               | Euxoa talis                  | 418860          | 131109 | 4650  | 12344 | 29530 | 779,000,000   | 348961        | 86569  | 3379  | 14607 | 30055            | 538,000,000 | 340385  | 77490  | 6162  | 16682 | 34145 | 539,200,000 | 49376  | 49376  | 11337          | 32484  | 75183  | 538,300,000 | 18   | NA | 75183  | 538,300,000 | 18   | NA  |                         |           |               |  |  |  |  |  |  |  |
| DA5_09_229               | H. helesiphoe (contaminated) | 1031124         | 392929 | 1185  | 1342  | 63730 | 821,500,000   | 1006511       | 349216 | 1039  | 2870  | 61466            | 682,300,000 | 1002087 | 346139 | 1047  | 2934  | 69841 | 683,000,000 | 295933 | 295933 | 1275           | 3631   | 237585 | 683,400,000 | NA   | NA | 237585 | 683,400,000 | NA   | NA  |                         |           |               |  |  |  |  |  |  |  |
| DA5_09_282               | H. sarae (contaminated)      | 378579          | 164605 | 5021  | 13117 | 30760 | 1,056,000,000 | 295511        | 114377 | 6337  | 15886 | 33553            | 864,000,000 | 281774  | 104207 | 7161  | 17905 | 36697 | 864,000,000 | 75266  | 75266  | 10960          | 30705  | 63304  | 863,400,000 | NA   | NA | 63304  | 863,400,000 | NA   | NA  |                         |           |               |  |  |  |  |  |  |  |
| DA5_09_313               | H. demeter                   | 247161          | 66358  | 5918  | 17609 | 45434 | 458,000,000   | 209934        | 43155  | 8624  | 23462 | 52141            | 366,500,000 | 203389  | 39455  | 9821  | 23598 | 56518 | 367,300,000 | 22362  | 22362  | 2743           | 67916  | 138168 | 366,200,000 | 19   | 19 | 138168 | 366,200,000 | 19   | 19  | 0.012612                |           |               |  |  |  |  |  |  |  |
| DA5_09_59                | H. burnesii                  | 236587          | 72288  | 8355  | 23488 | 50187 | 528,000,000   | 231511        | 52511  | 10442 | 28075 | 59154            | 382,100,000 | 224566  | 48466  | 11577 | 33002 | 66154 | 381,300,000 | 31357  | 31357  | 33996          | 106212 | 236566 | 518,600,000 | 18   | 18 | 236566 | 518,600,000 | 18   | 18  | 0.0219661               |           |               |  |  |  |  |  |  |  |
| DA5_110_111              | H. hecalesia                 | 244773          | 68517  | 4117  | 16849 | 46621 | 351,600,000   | 218888        | 48470  | 6223  | 22140 | 51023            | 299,000,000 | 213955  | 47335  | 6804  | 23685 | 53378 | 300,800,000 | 28758  | 28758  | 21561          | 64748  | 137215 | 299,500,000 | 19   | 19 | 137215 | 299,500,000 | 19   | 19  |                         |           |               |  |  |  |  |  |  |  |
| DA5_11_759               | Dryas kala                   | 262564          | 126648 | 4655  | 10717 | 21379 | 738,300,000   | 181690        | 84166  | 5384  | 13229 | 24030            | 568,000,000 | 172380  | 76244  | 6209  | 13988 | 27176 | 567,300,000 | 53607  | 53607  | 9200           | 21881  | 44869  | 566,300,000 | 21   | 21 | 44869  | 566,300,000 | 21   | 21  | 0.03004445              |           |               |  |  |  |  |  |  |  |
| DA5_11_819               | H. helesiphoe                | 288514          | 127668 | 3876  | 9876  | 23834 | 625,200,000   | 181845        | 76422  | 5031  | 13162 | 29887            | 483,700,000 | 168094  | 64146  | 6218  | 16255 | 35533 | 484,000,000 | 37487  | 37487  | 13919          | 42617  | 93266  | 483,200,000 | 14   | 14 | 93266  | 483,200,000 | 14   | 14  | 0.00984165              |           |               |  |  |  |  |  |  |  |
| DA5_GEE1                 | H. helesiphoe                | 353019          | 101318 | 4991  | 16636 | 36549 | 580,800,000   | 326487        | 89196  | 4839  | 18062 | 40389            | 444,200,000 | 320240  | 83726  | 4949  | 19584 | 44177 | 446,100,000 | 62414  | 62414  | 7710           | 30062  | 68093  | 443,400,000 | 15   | 15 | 62414  | 443,400,000 | 15   | 15  |                         |           |               |  |  |  |  |  |  |  |
| DA5_H313_133             | H. parthenocera              | 265243          | 86702  | 5628  | 13961 | 42988 | 554,800,000   | 243331        | 66861  | 5815  | 20855 | 48146            | 400,100,000 | 234887  | 62915  | 6409  | 22957 | 53483 | 400,000,000 | 45174  | 45174  | 9770           | 33387  | 79033  | 399,400,000 | 15   | 15 | 79033  | 399,400,000 | 15   | 15  | 0.0227011               |           |               |  |  |  |  |  |  |  |
| DA5_I_samarita           | H. samarita                  | 198294          | 60476  | 5598  | 17498 | 46888 | 383,200,000   | 179991        | 45771  | 7102  | 21606 | 54861            | 318,500,000 | 343031  | 82052  | 8203  | 23886 | 56035 | 338,900,000 | 28649  | 28649  | 13864          | 41310  | 86120  | 338,200,000 | 15   | 15 | 86120  | 338,200,000 | 15   | 15  | 0.02123072              |           |               |  |  |  |  |  |  |  |
| DA5_I_yafno              | H. yafno                     | 176072          | 63050  | 7916  | 20282 | 48977 | 501,700,000   | 159886        | 48970  | 5978  | 25487 | 48979            | 321,500,000 | 299325  | 76765  | 10888 | 28486 | 54179 | 441,200,000 | 26207  | 26207  | 18569          | 34460  | 109117 | 320,900,000 | 14   | 14 | 109117 | 320,900,000 | 14   | 14  | 0.02738164              |           |               |  |  |  |  |  |  |  |
| DA5_I_nicula             | H. nicula                    | 336937          | 153231 | 1545  | 4255  | 16864 | 389,700,000   | 225349        | 100713 | 2069  | 3755  | 28818            | 235,300,000 | 224707  | 390067 | 2084  | 5807  | 20892 | 315,400,000 | 96141  | 96141  | 6213           | 6213   | 21638  | 315,200,000 | NA   | NA | 21638  | 315,200,000 | NA   | NA  |                         |           |               |  |  |  |  |  |  |  |
| DA5_4_nunata             | H. nunata                    | 105488          | 36351  | 15823 | 40235 | 87601 | 459,200,000   | 94732         | 27983  | 18825 | 48647 | 103825           | 349,300,000 | 183176  | 54797  | 18979 | 48049 | 97720 | 459,000,000 | 20089  | 20089  | 24669          | 61332  | 119220 | 349,000,000 | 15   | 15 | 119220 | 349,000,000 | 15   | 15  | 0.02357045              |           |               |  |  |  |  |  |  |  |
| DA5_5_madagascara        | H. madagascara               | 100965          | 39445  | 9339  | 23391 | 64861 | 385,200,000   | 87178         | 28778  | 12362 | 31653 | 78161            | 293,400,000 | 171385  | 53379  | 13150 | 33008 | 74748 | 387,000,000 | 17878  | 17878  | 23034          | 59409  | 122385 | 383,200,000 | 14   | 14 | 122385 | 383,200,000 | 14   | 14  | 0.01305165              |           |               |  |  |  |  |  |  |  |
| MCM_davis_8897           | H. davis                     | 221409          | 91245  | 3880  | 14833 | 37885 | 468,000,000   | 154882        | 60204  | 5818  | 18626 | 41275            | 404,800,000 | 145759  | 54304  | 6597  | 20760 | 44847 | 405,400,000 | 31556  | 31556  | 16578          | 48801  | 94078  | 404,300,000 | 22   | 22 | 94078  | 404,300,000 | 22   | 22  | 0.00906053              |           |               |  |  |  |  |  |  |  |
| MCM_antoniolewis_F1_6700 | H. arato H. himera hybrid    | 265842          | 68706  | 15463 | 24266 | 70239 | 789,700,000   | 245020        | 59910  | 14725 | 39027 | 78716            | 587,700,000 | -       | -      | -     | -     | -     | -           | 38570  | 38570  | 20397          | 52193  | 108955 | 587,200,000 | 21   | 21 | 108955 | 587,200,000 | 21   | 21  |                         |           |               |  |  |  |  |  |  |  |
| MCM_nicula_7203          | H. nicula                    | 321789          | 118425 | 2970  | 9064  | 23151 | 461,000,000   | 279796        | 88656  | 3327  | 11325 | 27610            | 351,100,000 | 264792  | 80086  | 3693  | 12717 | 30065 | 352,600,000 | 53970  | 53970  | 6678           | 36514  | 89999  | 350,700,000 | 15   | 15 | 89999  | 350,700,000 | 15   | 15  | 0.0202421               |           |               |  |  |  |  |  |  |  |
| MCM_himera_6900          | H. himera                    | 251946          | 86424  | 8575  | 22399 | 38780 | 441,000,000   | 115395        | 45443  | 8637  | 26714 | 63100            | 399,000,000 | 109230  | 29688  | 9746  | 28271 | 64226 | 401,300,000 | 25411  | 25411  | 19884          | 48840  | 105881 | 376,400,000 | NA   | NA | 105881 | 376,400,000 | NA   | NA  |                         |           |               |  |  |  |  |  |  |  |
| MCM_himera_father_6363   | H. himera                    | 230072          | 88626  | 3658  | 12057 | 38868 | 485,300,000   | 162340        | 63848  | 5083  | 13757 | 32461            | 410,800,000 | 165811  | 62968  | 5187  | 14914 | 32848 | 411,000,000 | 44859  | 44859  | 6244           | 23885  | 48666  | 410,000,000 | 21   | 21 | 48666  | 410,000,000 | 21   | 21  | 0.01885764              |           |               |  |  |  |  |  |  |  |
| MCM_arato_mother_6304    | H. arato                     | 225412          | 69910  | 10121 | 27480 | 68004 | 564,000,000   | 201688        | 48728  | 13032 | 32668 | 70938            | 447,700,000 | 196462  | 43501  | 13478 | 35816 | 75008 | 448,500,000 | 31014  | 31014  | 20626          | 53995  | 112169 | 447,200,000 | 21   | 21 | 112169 | 447,200,000 | 21   | 21  | 0.00813964              |           |               |  |  |  |  |  |  |  |
| REL_wytilae              | A. wytilae                   | 419513          | 138877 | 3212  | 7439  | 16553 | 505,500,000   | 333333        | 79911  | 3698  | 9233  | 19317            | 390,500,000 | -       | -      | -     | -     | -     | -           | 45022  | 45022  | 7064           | 21374  | 47700  | 390,100,000 | 14   | 14 | 47700  | 390,100,000 | 14   | 14  | 0.0158481               |           |               |  |  |  |  |  |  |  |

**Table S3: Mapping to reference.** This table provides statistics on the reciprocal mapping coverage of *de novo* genomes and previously published reference genome assemblies.

| Genome                         | Total Size | Total Sequences > 1KB | Fraction Aligned * | Fraction Single Copy | fraction repeats | single copy + repeats | coding aligned | non-coding aligned | Alignment Target               |
|--------------------------------|------------|-----------------------|--------------------|----------------------|------------------|-----------------------|----------------|--------------------|--------------------------------|
| H. melpomene reference (Hmel2) | 275198219  | 794                   | 0.942361           | 0.814264045          | 0.1473           | 0.961564045           | NA             | NA                 | H. melpomene w2rap             |
| H. melpomene w2rap             | 289529429  | 12179                 | 0.957001           | 0.851926705          | 0.1464           | 0.998326705           | 0.993          | 0.953              | H. melpomene reference (Hmel2) |
| H. erato demophoon reference   | 382828983  | 195                   | 0.883146           | 0.658102687          | 0.2015           | 0.859602687           | NA             | NA                 | H. erato w2rap                 |
| H. erato w2rap                 | 441457298  | 21969                 | 0.925971           | 0.749634089          | 0.2133           | 0.962934089           | 0.985          | 0.919              | H. erato demophoon reference   |

\* this value is the percent of the alignment target covered at least 1X by the query genome

**Table S4: Scaffolding With DISCOVAR filled gap.** This is an example output for the SWD pipeline showing a group of three filled gaps.

| <b>Scaffold</b> | <b>Group</b> | <b>Contig</b>       | <b>Start</b> | <b>End</b> | <b>Strand</b> |
|-----------------|--------------|---------------------|--------------|------------|---------------|
| Hmel201001o     | 3            | Hmel201001o_2       | 0            | 92309      | +             |
| Hmel201001o     | 3            | El-a-scaffold-12909 | 8072         | 9336       | -             |
| Hmel201001o     | 3            | Hmel201001o_3       | 761          | 280226     | +             |
| Hmel201001o     | 3            | El-a-scaffold-13029 | 6832         | 7959       | +             |
| Hmel201001o     | 3            | Hmel201001o_4       | 639          | 69269      | +             |
| Hmel201001o     | 3            | El-a-scaffold-13029 | 77551        | 78099      | +             |
| Hmel201001o     | 3            | Hmel201001o_5       | 555          | 491511     | +             |



**Table S5: Gap-filling output.** This table is a comparison of summary statistics for the Hmel2.5 genome and that same genome after gaps were filled with SWD.

| Genome              | Contigs | Total Contig Length | Mean contig | Contig N50 | Gaps | Total Gap Length | Mean Gap Length | Gap N50 |
|---------------------|---------|---------------------|-------------|------------|------|------------------|-----------------|---------|
| Hmel2.5             | 3111    | 274214515           | 88143       | 329606     | 2990 | 1031298          | 371             | 2233    |
| Hmel2.5, gap-filled | 2423    | 274117371           | 113131      | 458152     | 2091 | 795323           | 380             | 1466    |

w2rap melpomene full genome

```
=====
sequences:          12179
total length:      289529429 bp (289477054 bp excl N/X-runs)
GC level:          32.74 %
bases masked:      42390139 bp ( 14.64 %)
```

|                                    | number of elements* | length occupied | percentage of sequence |
|------------------------------------|---------------------|-----------------|------------------------|
| Retroelements                      | 18032               | 4390549 bp      | 1.52 %                 |
| SINEs:                             | 684                 | 34049 bp        | 0.01 %                 |
| Penelope                           | 2                   | 155 bp          | 0.00 %                 |
| LINEs:                             | 12167               | 3257088 bp      | 1.12 %                 |
| CRE/SLACS                          | 0                   | 0 bp            | 0.00 %                 |
| L2/CR1/Rex                         | 6128                | 1511859 bp      | 0.52 %                 |
| R1/LOA/Jockey                      | 2340                | 674824 bp       | 0.23 %                 |
| R2/R4/NeSL                         | 1459                | 468411 bp       | 0.16 %                 |
| RTE/Bov-B                          | 1740                | 483943 bp       | 0.17 %                 |
| L1/CIN4                            | 12                  | 624 bp          | 0.00 %                 |
| LTR elements:                      | 5181                | 1099412 bp      | 0.38 %                 |
| BEL/Pao                            | 633                 | 144481 bp       | 0.05 %                 |
| Ty1/Copia                          | 178                 | 40374 bp        | 0.01 %                 |
| Gypsy/DIRS1                        | 3862                | 807954 bp       | 0.28 %                 |
| Retroviral                         | 0                   | 0 bp            | 0.00 %                 |
| DNA transposons                    | 231972              | 30820377 bp     | 10.64 %                |
| hobo-Activator                     | 8196                | 1506936 bp      | 0.52 %                 |
| Tc1-IS630-Pogo                     | 123631              | 15828698 bp     | 5.47 %                 |
| En-Spm                             | 0                   | 0 bp            | 0.00 %                 |
| MuDR-IS905                         | 0                   | 0 bp            | 0.00 %                 |
| PiggyBac                           | 88                  | 35700 bp        | 0.01 %                 |
| Tourist/Harbinger                  | 11                  | 1563 bp         | 0.00 %                 |
| Other (Mirage, P-element, Transib) | 146                 | 7447 bp         | 0.00 %                 |
| Rolling-circles                    | 0                   | 0 bp            | 0.00 %                 |
| Unclassified:                      | 1997                | 282672 bp       | 0.10 %                 |
| Total interspersed repeats:        |                     | 35493598 bp     | 12.26 %                |
| Small RNA:                         | 790                 | 49738 bp        | 0.02 %                 |
| Satellites:                        | 331                 | 18247 bp        | 0.01 %                 |
| Simple repeats:                    | 128725              | 5687070 bp      | 1.96 %                 |
| Low complexity:                    | 25791               | 1246843 bp      | 0.43 %                 |

w2rap sequences inserted across gaps

```
=====
sequences:          792
total length:      1909413 bp (1908113 bp excl N/X-runs)
GC level:          32.90 %
bases masked:      600714 bp ( 31.46 %)
```

|                                    | number of elements* | length occupied | percentage of sequence |
|------------------------------------|---------------------|-----------------|------------------------|
| Retroelements                      | 1805                | 299637 bp       | 15.69 %                |
| SINEs:                             | 1432                | 179734 bp       | 9.41 %                 |
| Penelope                           | 15                  | 7175 bp         | 0.38 %                 |
| LINEs:                             | 274                 | 91167 bp        | 4.77 %                 |
| CRE/SLACS                          | 0                   | 0 bp            | 0.00 %                 |
| L2/CR1/Rex                         | 84                  | 29195 bp        | 1.53 %                 |
| R1/LOA/Jockey                      | 23                  | 5461 bp         | 0.29 %                 |
| R2/R4/NeSL                         | 19                  | 7326 bp         | 0.38 %                 |
| RTE/Bov-B                          | 71                  | 24710 bp        | 1.29 %                 |
| L1/CIN4                            | 0                   | 0 bp            | 0.00 %                 |
| LTR elements:                      | 99                  | 28736 bp        | 1.50 %                 |
| BEL/Pao                            | 9                   | 2630 bp         | 0.14 %                 |
| Ty1/Copia                          | 5                   | 322 bp          | 0.02 %                 |
| Gypsy/DIRS1                        | 45                  | 10596 bp        | 0.55 %                 |
| Retroviral                         | 0                   | 0 bp            | 0.00 %                 |
| DNA transposons                    | 620                 | 90142 bp        | 4.72 %                 |
| hobo-Activator                     | 41                  | 8030 bp         | 0.42 %                 |
| Tc1-IS630-Pogo                     | 371                 | 40697 bp        | 2.13 %                 |
| En-Spm                             | 0                   | 0 bp            | 0.00 %                 |
| MuDR-IS905                         | 0                   | 0 bp            | 0.00 %                 |
| PiggyBac                           | 51                  | 10913 bp        | 0.57 %                 |
| Tourist/Harbinger                  | 0                   | 0 bp            | 0.00 %                 |
| Other (Mirage, P-element, Transib) | 9                   | 704 bp          | 0.04 %                 |
| Rolling-circles                    | 0                   | 0 bp            | 0.00 %                 |
| Unclassified:                      | 652                 | 174562 bp       | 9.14 %                 |
| Total interspersed repeats:        |                     | 564341 bp       | 29.56 %                |
| Small RNA:                         | 1431                | 179655 bp       | 9.41 %                 |
| Satellites:                        | 7                   | 338 bp          | 0.02 %                 |
| Simple repeats:                    | 695                 | 30687 bp        | 1.61 %                 |
| Low complexity:                    | 137                 | 6194 bp         | 0.32 %                 |

**Table S6 Comparison of general *H melpomene* de novo repeat content with repeat content of regions used to fill gaps in Hmel2.**

**Table S7: Pairwise coverage.** This table provides a summary of pairwise coverage between the indicated genome and *H. melpomene* (Hmel2.5) in the progressiveCactus multiple sequence alignment.

| Species                          | Exonic Aligned Bases | Intronic Aligned Bases | Intergenic Aligned Bases | Total Aligned Bases | Total fraction Aligned Bases | Percent Identity with Hmel2.5 |
|----------------------------------|----------------------|------------------------|--------------------------|---------------------|------------------------------|-------------------------------|
| <i>A. vanillae</i>               | 24097265             | 28989986               | 66553755                 | 119641006           | 0.434742028                  | 85.744                        |
| <i>B. anynana</i>                | 21097464             | 10153992               | 18682837                 | 49934293            | 0.181447286                  | 75.122                        |
| <i>B. mori</i>                   | 18148815             | 3531535                | 5495058                  | 27175408            | 0.098747849                  | 70.161                        |
| <i>D. plexippus</i>              | 20456742             | 7653762                | 14576915                 | 42687419            | 0.155114168                  | 74.559                        |
| <i>E. tales</i>                  | 24621153             | 37597605               | 82128987                 | 144347745           | 0.524519422                  | 87.93                         |
| <i>H. besckei</i>                | 26688422             | 66337604               | 135787543                | 228813569           | 0.831444655                  | 94.493                        |
| <i>H. cydno</i>                  | 26949426             | 71193415               | 145130181                | 243273022           | 0.883986272                  | 95.431                        |
| <i>H. demeter</i>                | 25348301             | 53240913               | 113086551                | 191675765           | 0.696496239                  | 92.083                        |
| <i>H. erato de novo</i>          | 25098699             | 51204203               | 109130872                | 185433774           | 0.673814586                  | 91.463                        |
| <i>H. erato/H. himera hybrid</i> | 25152324             | 52063794               | 110781241                | 187997359           | 0.683129938                  | 91.725                        |
| <i>H. erato reference</i>        | 25014475             | 51118217               | 108693122                | 184825814           | 0.671605429                  | 92.461                        |
| <i>H. himera</i>                 | 25064348             | 50612316               | 107874008                | 183550672           | 0.666971919                  | 91.661                        |
| <i>H. hecalesia</i>              | 25215400             | 51964526               | 110511018                | 187690944           | 0.682016512                  | 91.559                        |
| <i>H. melpomene de novo</i>      | 27622639             | 78415264               | 160715437                | 266753340           | 0.969307195                  | 96.367                        |
| <i>H. numata</i>                 | 26557912             | 67149274               | 137656437                | 231363623           | 0.840710839                  | 94.867                        |
| <i>H. pardalinus</i>             | 26559866             | 67296306               | 138047997                | 231904169           | 0.842675033                  | 95.183                        |
| <i>H. sara</i>                   | 25205144             | 51454453               | 109981601                | 186641198           | 0.678202028                  | 91.047                        |
| <i>H. telesiphe</i>              | 25320375             | 53937353               | 114098714                | 193356442           | 0.70260335                   | 91.75                         |
| <i>H. timareta</i>               | 27134044             | 71545070               | 145798364                | 244477478           | 0.888362929                  | 95.71                         |
| <i>L. accius</i>                 | 18662013             | 4727985                | 8021427                  | 31411425            | 0.114140352                  | 72.767                        |
| <i>H. doris</i>                  | 25476851             | 54956304               | 114965325                | 195398480           | 0.710023547                  | 90.728                        |
| <i>M. cinxia</i>                 | 19301595             | 13207459               | 28287896                 | 60796950            | 0.22091915                   | 76.646                        |
| <i>P. polytes</i>                | 18342885             | 5153458                | 8888529                  | 32384872            | 0.117677587                  | 72.614                        |
| <i>P. xytostella</i>             | 15083665             | 2414768                | 3610607                  | 21109040            | 0.07670436                   | 68.717                        |

**Table S8: Phylogeny Datasets.** This table provides a summary of all datasets used to construct species trees.

| Data set                                            | Number of taxa | Number of loci used in ASTRAL analyses | Number of characters used in concatenated analysis |
|-----------------------------------------------------|----------------|----------------------------------------|----------------------------------------------------|
| Genes                                               | 25             | 4090                                   | 4,955,181                                          |
| Noncoding blocks (100 bp or longer)                 | 25             | 100                                    | 15,144                                             |
| Noncoding blocks (150 bp or longer)                 | 25             | 30                                     | 6640                                               |
| Coding blocks (100 bp or longer)                    | 25             | 3572                                   | 596,163                                            |
| Coding blocks (150 bp or longer)                    | 25             | 1641                                   | 367,915                                            |
| Heliconini only noncoding blocks (100 bp or longer) | 17             | 328                                    | 47,945                                             |
| Heliconini only noncoding blocks (150 bp or longer) | 17             | 102                                    | 20,368                                             |
| Heliconini only coding blocks (100 bp or longer)    | 17             | 10,473                                 | 1,870,808                                          |
| Heliconini only coding blocks (150 bp or longer)    | 17             | 5441                                   | 1,258,140                                          |

| Outgroup | P3   | P2   | P1   | D       | SE       | Z       | BABA  | ABBA  | Total SNPs |
|----------|------|------|------|---------|----------|---------|-------|-------|------------|
| Etal     | Htel | Hhsa | Hera | -0.2427 | 0.003064 | -79.224 | 58235 | 95569 | 6671421    |
| Etal     | Htel | Hhsa | Hhim | -0.2426 | 0.00309  | -78.502 | 57923 | 95029 | 6671421    |
| Etal     | Hdem | Hhsa | Hera | -0.1554 | 0.002941 | -52.818 | 61308 | 83862 | 6671421    |
| Etal     | Hdem | Hhsa | Hhim | -0.1529 | 0.002966 | -51.551 | 61093 | 83144 | 6671421    |
| Etal     | Hsar | Hhsa | Hera | -0.1476 | 0.002905 | -50.819 | 63018 | 84849 | 6671421    |
| Etal     | Hsar | Hhsa | Hhim | -0.1458 | 0.002946 | -49.495 | 62823 | 84273 | 6671421    |
| Etal     | Htel | Hsar | Hdem | 0.1427  | 0.003014 | 47.344  | 66620 | 49980 | 6671421    |
| Etal     | Hhsa | Hsar | Hdem | 0.1332  | 0.002961 | 44.98   | 69992 | 53537 | 6671421    |
| Etal     | Hhim | Hsar | Hdem | 0.1304  | 0.002939 | 44.375  | 68700 | 52846 | 6671421    |
| Etal     | Hera | Hsar | Hdem | 0.1293  | 0.002931 | 44.107  | 68706 | 52974 | 6671421    |
| Etal     | Hdem | Htel | Hera | -0.109  | 0.002801 | -38.905 | 69053 | 85941 | 6671421    |
| Etal     | Hdem | Htel | Hhim | -0.1061 | 0.002827 | -37.543 | 68989 | 85374 | 6671421    |
| Etal     | Hsar | Htel | Hera | -0.1016 | 0.002781 | -36.532 | 70651 | 86631 | 6671421    |
| Etal     | Hsar | Htel | Hhim | -0.0995 | 0.002806 | -35.455 | 70600 | 86199 | 6671421    |
| Etal     | Hsar | Htel | Hhsa | 0.0421  | 0.003168 | 13.296  | 72375 | 66524 | 6671421    |
| Etal     | Hdem | Htel | Hhsa | 0.0414  | 0.003197 | 12.954  | 71248 | 65582 | 6671421    |
| Etal     | Hdem | Hera | Hhim | 0.007   | 0.003845 | 1.832   | 35957 | 35454 | 6671421    |
| Etal     | Hhsa | Hera | Hhim | 0.0055  | 0.003732 | 1.465   | 38612 | 38192 | 6671421    |
| Etal     | Hsar | Hera | Hhim | 0.0052  | 0.003787 | 1.376   | 36735 | 36354 | 6671421    |
| Etal     | Htel | Hera | Hhim | 0.0032  | 0.003803 | 0.828   | 36298 | 36070 | 6671421    |

**Table S9 *erato* clade *D*-statistics given species tree**

*These erato clade D-statistic values are ordered by absolute value, and assume the species tree shown in Fig. 1A.*

| Outgroup | P3   | P2   | P1   | D       | SE       | Z       | BABA  | ABBA  | Total SNPs |
|----------|------|------|------|---------|----------|---------|-------|-------|------------|
| Etal     | Hmel | Hbes | Hpar | 0.2691  | 0.003107 | 86.621  | 93490 | 53839 | 6671421    |
| Etal     | Htim | Hbes | Hpar | 0.2491  | 0.003073 | 81.045  | 91074 | 54755 | 6671421    |
| Etal     | Hpar | Hbes | Hnum | 0.2267  | 0.003089 | 73.392  | 84703 | 53395 | 6671421    |
| Etal     | Hcyd | Hbes | Hpar | 0.2168  | 0.003118 | 69.537  | 86650 | 55771 | 6671421    |
| Etal     | Hbes | Hpar | Hmel | -0.1679 | 0.003451 | -48.639 | 53839 | 75559 | 6671421    |
| Etal     | Hmel | Hpar | Hnum | -0.1655 | 0.003587 | -46.143 | 52575 | 73431 | 6671421    |
| Etal     | Hmel | Hbes | Hnum | 0.1490  | 0.00316  | 47.159  | 72458 | 53663 | 6671421    |
| Etal     | Htim | Hpar | Hnum | -0.1482 | 0.003544 | -41.827 | 53024 | 71480 | 6671421    |
| Etal     | Htim | Hbes | Hnum | 0.1421  | 0.003149 | 45.131  | 71777 | 53914 | 6671421    |
| Etal     | Hcyd | Hbes | Hnum | 0.1265  | 0.003135 | 40.339  | 69857 | 54172 | 6671421    |
| Etal     | Hcyd | Hpar | Hnum | -0.1248 | 0.003575 | -34.899 | 53294 | 68488 | 6671421    |
| Etal     | Hbes | Hpar | Hnum | 0.1191  | 0.003539 | 33.665  | 67839 | 53395 | 6671421    |
| Etal     | Hpar | Hcyd | Hmel | 0.1140  | 0.004143 | 27.509  | 51848 | 41239 | 6671421    |
| Etal     | Hcyd | Htim | Hmel | -0.1132 | 0.005137 | -22.040 | 51004 | 64028 | 6671421    |
| Etal     | Hnum | Hbes | Hpar | 0.1106  | 0.003456 | 31.989  | 84703 | 67839 | 6671421    |
| Etal     | Hpar | Htim | Hcyd | -0.0887 | 0.004067 | -21.798 | 38607 | 46118 | 6671421    |
| Etal     | Hnum | Hcyd | Hmel | 0.0575  | 0.004007 | 14.358  | 45466 | 40519 | 6671421    |
| Etal     | Hnum | Htim | Hcyd | -0.0535 | 0.004005 | -13.364 | 37568 | 41817 | 6671421    |
| Etal     | Ldor | Hbes | Hcyd | 0.0442  | 0.00308  | 14.339  | 55903 | 51174 | 6671421    |
| Etal     | Ldor | Hbes | Hnum | 0.0418  | 0.003251 | 12.857  | 49650 | 45666 | 6671421    |
| Etal     | Ldor | Hbes | Htim | 0.0349  | 0.003114 | 11.193  | 55385 | 51654 | 6671421    |
| Etal     | Hpar | Htim | Hmel | 0.0331  | 0.004243 | 7.812   | 48280 | 45182 | 6671421    |
| Etal     | Ldor | Hpar | Hcyd | 0.0315  | 0.003312 | 9.508   | 47857 | 44935 | 6671421    |
| Etal     | Ldor | Hbes | Hmel | 0.0298  | 0.003121 | 9.562   | 55457 | 52243 | 6671421    |
| Etal     | Hbes | Htim | Hcyd | -0.0271 | 0.00399  | -6.797  | 37145 | 39216 | 6671421    |
| Etal     | Ldor | Hpar | Hnum | 0.0253  | 0.003432 | 7.373   | 44106 | 41929 | 6671421    |
| Etal     | Ldor | Hcyd | Hmel | -0.0242 | 0.004009 | -6.042  | 30517 | 32032 | 6671421    |
| Etal     | Hbes | Hcyd | Hmel | 0.0222  | 0.003958 | 5.601   | 42353 | 40516 | 6671421    |
| Etal     | Ldor | Hpar | Htim | 0.0212  | 0.003382 | 6.259   | 46405 | 44481 | 6671421    |
| Etal     | Hmel | Htim | Hcyd | -0.0198 | 0.004771 | -4.151  | 51004 | 53065 | 6671421    |
| Etal     | Ldor | Hbes | Hpar | 0.0175  | 0.003143 | 5.581   | 52407 | 50600 | 6671421    |
| Etal     | Ldor | Htim | Hcyd | 0.0173  | 0.004163 | 4.162   | 29300 | 28302 | 6671421    |
| Etal     | Ldor | Hpar | Hmel | 0.0156  | 0.003434 | 4.542   | 45806 | 44399 | 6671421    |
| Etal     | Ldor | Htim | Hmel | -0.0083 | 0.004034 | -2.047  | 31053 | 31570 | 6671421    |
| Etal     | Hnum | Htim | Hmel | 0.0081  | 0.004022 | 2.014   | 43439 | 42741 | 6671421    |
| Etal     | Ldor | Hnum | Hmel | -0.0081 | 0.003328 | -2.423  | 47369 | 48139 | 6671421    |
| Etal     | Ldor | Hnum | Hcyd | 0.0078  | 0.00324  | 2.408   | 48121 | 47376 | 6671421    |
| Etal     | Hbes | Htim | Hmel | -0.0028 | 0.00396  | -0.717  | 41097 | 41331 | 6671421    |
| Etal     | Ldor | Hnum | Htim | -0.0027 | 0.003309 | -0.803  | 47464 | 47717 | 6671421    |

**Table S10** *melpomene* clade *D*-statistics given species tree

*These melpomene clade D-statistic values are ordered by absolute value and assume the species tree shown in Fig. 1A. Values for all topologies are shown when they include the silvaniform clade polytomy.*

**Table S11: D statistics.** This table shows the raw output of the D statistic calculations using the full Lepidoptera alignment and the Heliconiini-only alignment

| Outgroup | P3          | P2   | P1          | Lepidoptera Alignment (Harvard) |          |        |      | Heliconiini Alignment (Leibase) |        |         |        | BABA sites | ABBA sites | Total SNPs |        |        |         |
|----------|-------------|------|-------------|---------------------------------|----------|--------|------|---------------------------------|--------|---------|--------|------------|------------|------------|--------|--------|---------|
|          |             |      |             | D                               | SE       | Z      | best | D                               | SE     | Z       | best   |            |            |            |        |        |         |
| Etal     | Htel        | Hhsa | Hera        | 0.2431                          | 0.015724 | 15.459 | -    | 58235                           | 95569  | 6671421 | 0.2426 | 0.011299   | 21.474     | -          | 28766  | 47179  | 3242509 |
| Etal     | Hhsa        | Htel | Hera        | 0.007                           | 0.032702 | 0.214  | best | 96921                           | 95569  | 6671421 | 0.0056 | 0.021243   | 0.262      | best       | 46658  | 47179  | 3242509 |
| Etal     | Hera        | Htel | Hhsa        | 0.2496                          | 0.016523 | 15.11  | -    | 96921                           | 58235  | 6671421 | 0.2374 | 0.010306   | 23.033     | -          | 46658  | 28766  | 3242509 |
| Etal     | Htel        | Hhsa | Hhim        | 0.2429                          | 0.016322 | 14.884 | -    | 57923                           | 95029  | 6671421 | 0.2344 | 0.012196   | 19.218     | -          | 28687  | 46231  | 3242509 |
| Etal     | Hhsa        | Htel | Hhim        | 0.0092                          | 0.032859 | 0.28   | best | 96801                           | 95029  | 6671421 | 0.0038 | 0.021894   | 0.175      | best       | 46590  | 46231  | 3242509 |
| Etal     | Hhim        | Htel | Hhsa        | 0.2516                          | 0.016492 | 15.255 | -    | 96801                           | 57923  | 6671421 | 0.238  | 0.010465   | 22.739     | -          | 46590  | 28687  | 3242509 |
| Etal     | Htel        | Hhsa | HeraHhimHyl | 0.241                           | 0.015971 | 15.093 | -    | 58040                           | 94840  | 6671421 | 0.2354 | 0.011828   | 19.904     | -          | 28673  | 46312  | 3242509 |
| Etal     | Hhsa        | Htel | HeraHhimHyl | 0.0101                          | 0.032771 | 0.31   | best | 96789                           | 94840  | 6671421 | 0.0036 | 0.021585   | 0.168      | best       | 46651  | 46312  | 3242509 |
| Etal     | HeraHhimHyl | Htel | Hhsa        | 0.2506                          | 0.016728 | 14.98  | -    | 96789                           | 58040  | 6671421 | 0.2388 | 0.010526   | 22.688     | -          | 46651  | 28673  | 3242509 |
| Etal     | Htel        | Hhsa | Hsar        | 0.2892                          | 0.019022 | 15.206 | -    | 66524                           | 120626 | 6671421 | 0.2706 | 0.012806   | 21.134     | -          | 33628  | 58570  | 3242509 |
| Etal     | Hhsa        | Htel | Hsar        | 0.2502                          | 0.015011 | 16.666 | -    | 72375                           | 120626 | 6671421 | 0.2375 | 0.011128   | 21.344     | -          | 36097  | 58570  | 3242509 |
| Etal     | Hsar        | Htel | Hhsa        | 0.0421                          | 0.009787 | 4.297  | best | 72375                           | 66524  | 6671421 | 0.0354 | 0.006844   | 5.169      | best       | 36097  | 33628  | 3242509 |
| Etal     | Htel        | Hhsa | Hdem        | 0.2224                          | 0.022406 | 9.925  | -    | 65582                           | 103044 | 6671421 | 0.1993 | 0.015746   | 12.656     | -          | 33147  | 49630  | 3242509 |
| Etal     | Hhsa        | Htel | Hdem        | 0.1827                          | 0.017541 | 10.413 | -    | 71248                           | 103044 | 6671421 | 0.171  | 0.013243   | 12.912     | -          | 35149  | 49630  | 3242509 |
| Etal     | Hdem        | Htel | Hhsa        | 0.0413                          | 0.010152 | 4.071  | best | 71248                           | 65582  | 6671421 | 0.0293 | 0.007614   | 3.844      | best       | 35149  | 33147  | 3242509 |
| Etal     | Htel        | Hhsa | Ldor        | 0.7787                          | 0.005388 | 100    | -    | 58556                           | 470383 | 6671421 | 0.7925 | 0.003556   | 100        | -          | 28649  | 247396 | 3242509 |
| Etal     | Hhsa        | Htel | Ldor        | 0.7828                          | 0.00523  | 100    | -    | 57333                           | 470383 | 6671421 | 0.8019 | 0.003507   | 100        | -          | 27196  | 247396 | 3242509 |
| Etal     | Ldor        | Htel | Hhsa        | 0.0106                          | 0.002427 | 4.35   | best | 57333                           | 58556  | 6671421 | 0.026  | 0.003757   | 6.926      | best       | 27196  | 28649  | 3242509 |
| Etal     | Htel        | Hhsa | Hbes        | 0.7784                          | 0.005516 | 100    | -    | 57308                           | 459805 | 6671421 | 0.7794 | 0.003836   | 100        | -          | 28817  | 232385 | 3242509 |
| Etal     | Hhsa        | Htel | Hbes        | 0.782                           | 0.005467 | 100    | -    | 56257                           | 459805 | 6671421 | 0.7886 | 0.003714   | 100        | -          | 27467  | 232385 | 3242509 |
| Etal     | Hbes        | Htel | Hhsa        | 0.0093                          | 0.002785 | 3.322  | best | 56257                           | 57308  | 6671421 | 0.024  | 0.003989   | 6.015      | best       | 27467  | 28817  | 3242509 |
| Etal     | Htel        | Hhsa | Hpar        | 0.7794                          | 0.005347 | 100    | -    | 56683                           | 457032 | 6671421 | 0.7801 | 0.003866   | 100        | -          | 28485  | 230557 | 3242509 |
| Etal     | Hhsa        | Htel | Hpar        | 0.7821                          | 0.005318 | 100    | -    | 55902                           | 457032 | 6671421 | 0.7893 | 0.003735   | 100        | -          | 27151  | 230557 | 3242509 |
| Etal     | Hpar        | Htel | Hhsa        | 0.0069                          | 0.002895 | 2.395  | best | 55902                           | 56683  | 6671421 | 0.024  | 0.003798   | 6.314      | best       | 27151  | 28485  | 3242509 |
| Etal     | Htel        | Hhsa | Hnum        | 0.779                           | 0.00541  | 100    | -    | 56522                           | 454845 | 6671421 | 0.7802 | 0.003846   | 100        | -          | 28366  | 229645 | 3242509 |
| Etal     | Hhsa        | Htel | Hnum        | 0.7823                          | 0.005438 | 100    | -    | 55574                           | 454845 | 6671421 | 0.789  | 0.003649   | 100        | -          | 27096  | 229645 | 3242509 |
| Etal     | Hnum        | Htel | Hhsa        | 0.0085                          | 0.003277 | 2.58   | best | 55574                           | 56522  | 6671421 | 0.0229 | 0.004108   | 5.576      | best       | 27096  | 28366  | 3242509 |
| Etal     | Htel        | Hhsa | Htim        | 0.7798                          | 0.005353 | 100    | -    | 56339                           | 455127 | 6671421 | 0.7809 | 0.003771   | 100        | -          | 28311  | 230022 | 3242509 |
| Etal     | Hhsa        | Htel | Htim        | 0.7828                          | 0.005378 | 100    | -    | 55464                           | 455127 | 6671421 | 0.79   | 0.003697   | 100        | -          | 26985  | 230022 | 3242509 |
| Etal     | Htim        | Htel | Hhsa        | 0.0078                          | 0.003345 | 2.338  | best | 55464                           | 56339  | 6671421 | 0.024  | 0.004014   | 5.974      | best       | 26985  | 28311  | 3242509 |
| Etal     | Htel        | Hhsa | Hcyd        | 0.7796                          | 0.005356 | 100    | -    | 56314                           | 454456 | 6671421 | 0.7812 | 0.003758   | 100        | -          | 28218  | 229634 | 3242509 |
| Etal     | Hhsa        | Htel | Hcyd        | 0.783                           | 0.00542  | 100    | -    | 55320                           | 454456 | 6671421 | 0.7905 | 0.003659   | 100        | -          | 26870  | 229634 | 3242509 |
| Etal     | Hcyd        | Htel | Hhsa        | 0.0089                          | 0.003246 | 2.74   | best | 55320                           | 56314  | 6671421 | 0.0245 | 0.003941   | 6.21       | best       | 26870  | 28218  | 3242509 |
| Etal     | Htel        | Hhsa | Hmel        | 0.7796                          | 0.005363 | 100    | -    | 56467                           | 455855 | 6671421 | 0.7811 | 0.003827   | 100        | -          | 28306  | 230241 | 3242509 |
| Etal     | Hhsa        | Htel | Hmel        | 0.7832                          | 0.005465 | 100    | -    | 55439                           | 455855 | 6671421 | 0.7914 | 0.003643   | 100        | -          | 26820  | 230241 | 3242509 |
| Etal     | Hmel        | Htel | Hhsa        | 0.0092                          | 0.002893 | 3.172  | best | 55439                           | 56467  | 6671421 | 0.027  | 0.004144   | 6.506      | best       | 26820  | 28306  | 3242509 |
| Etal     | Htel        | Hhsa | Hhim        | 0.0031                          | 0.004158 | 0.755  | best | 36298                           | 36070  | 6671421 | 0.0247 | 0.005638   | 4.373      | best       | 18038  | 17169  | 3242509 |
| Etal     | Hera        | Htel | Hhim        | 0.7377                          | 0.005732 | 100    | -    | 238914                          | 36070  | 6671421 | 0.7395 | 0.004525   | 100        | -          | 114634 | 17169  | 3242509 |
| Etal     | Hhim        | Htel | Hera        | 0.7362                          | 0.005454 | 100    | -    | 238914                          | 36298  | 6671421 | 0.7281 | 0.004018   | 100        | -          | 114634 | 18038  | 3242509 |
| Etal     | Htel        | Hera | HeraHhimHyl | 0.01                            | 0.004787 | 2.085  | best | 26890                           | 26356  | 6671421 | 0.0299 | 0.006517   | 4.588      | best       | 13319  | 12545  | 3242509 |
| Etal     | Hera        | Htel | HeraHhimHyl | 0.8288                          | 0.00706  | 100    | -    | 281375                          | 26356  | 6671421 | 0.8304 | 0.005122   | 100        | -          | 135390 | 12545  | 3242509 |
| Etal     | HeraHhimHyl | Htel | Hera        | 0.8256                          | 0.00658  | 100    | -    | 281375                          | 26890  | 6671421 | 0.8209 | 0.005004   | 100        | -          | 135390 | 13319  | 3242509 |
| Etal     | Htel        | Hera | Hsar        | 0.0883                          | 0.007139 | 12.363 | best | 86631                           | 103399 | 6671421 | 0.0701 | 0.006021   | 11.636     | best       | 43348  | 49877  | 3242509 |
| Etal     | Hera        | Htel | Hsar        | 0.1882                          | 0.005951 | 31.623 | -    | 70651                           | 103399 | 6671421 | 0.1734 | 0.005348   | 32.412     | -          | 35142  | 49877  | 3242509 |
| Etal     | Hsar        | Htel | Hera        | 0.1016                          | 0.00449  | 22.631 | -    | 70651                           | 86631  | 6671421 | 0.1046 | 0.004471   | 23.388     | -          | 35142  | 43348  | 3242509 |
| Etal     | Htel        | Hera | Hdem        | 0.0008                          | 0.008587 | 0.092  | best | 85941                           | 80669  | 6671421 | 0.0229 | 0.007354   | 3.111      | best       | 43065  | 41135  | 3242509 |
| Etal     | Hera        | Htel | Hdem        | 0.1098                          | 0.007428 | 14.775 | -    | 69053                           | 80669  | 6671421 | 0.0928 | 0.006708   | 13.835     | -          | 34152  | 41135  | 3242509 |
| Etal     | Hdem        | Htel | Hera        | 0.109                           | 0.004531 | 24.052 | -    | 69053                           | 85941  | 6671421 | 0.1154 | 0.004865   | 23.728     | -          | 34152  | 43065  | 3242509 |
| Etal     | Htel        | Hera | Ldor        | 0.7365                          | 0.00312  | 100    | -    | 66996                           | 441489 | 6671421 | 0.7548 | 0.002401   | 100        | -          | 32538  | 232872 | 3242509 |
| Etal     | Hera        | Htel | Ldor        | 0.7397                          | 0.003302 | 100    | -    | 66066                           | 441489 | 6671421 | 0.7643 | 0.002084   | 100        | -          | 31108  | 232872 | 3242509 |
| Etal     | Ldor        | Htel | Hera        | 0.007                           | 0.003031 | 2.306  | best | 66066                           | 66996  | 6671421 | 0.0225 | 0.00379    | 5.929      | best       | 31108  | 32538  | 3242509 |
| Etal     | Htel        | Hera | Hbes        | 0.7366                          | 0.003244 | 100    | -    | 65291                           | 430454 | 6671421 | 0.7395 | 0.002822   | 100        | -          | 32610  | 217765 | 3242509 |
| Etal     | Hera        | Htel | Hbes        | 0.7342                          | 0.003287 | 100    | -    | 65978                           | 430454 | 6671421 | 0.7447 | 0.00238    | 100        | -          | 31871  | 217765 | 3242509 |
| Etal     | Hbes        | Htel | Hera        | 0.0052                          | 0.00343  | 1.528  | best | 65978                           | 65291  | 6671421 | 0.0115 | 0.004833   | 2.372      | best       | 31871  | 32610  | 3242509 |
| Etal     | Htel        | Hera | Hpar        | 0.7373                          | 0.003193 | 100    | -    | 64681                           | 427696 | 6671421 | 0.7402 | 0.002932   | 100        | -          | 32241  | 215900 | 3242509 |
| Etal     | Hera        | Htel | Hpar        | 0.733                           | 0.003157 | 100    | -    | 65911                           | 427696 | 6671421 | 0.7446 | 0.002369   | 100        | -          | 31615  | 215900 | 3242509 |
| Etal     | Hpar        | Htel | Hera        | 0.0094                          | 0.00302  | 3.12   | best | 65911                           | 64681  | 6671421 | 0.0098 | 0.004688   | 2.093      | best       | 31615  | 32241  | 3242509 |
| Etal     | Htel        | Hera | Hnum        | 0.737                           | 0.003347 | 100    | -    | 64405                           | 425394 | 6671421 | 0.7398 | 0.002846   | 100        | -          | 32153  | 215019 | 3242509 |
| Etal     | Hera        | Htel | Hnum        | 0.7322                          | 0.003299 | 100    | -    | 65784                           | 425394 | 6671421 | 0.744  | 0.002325   | 100        | -          | 31562  | 215019 | 3242509 |
| Etal     | Hnum        | Htel | Hera        | 0.0106                          | 0.003138 | 3.376  | best | 65784                           | 64405  | 6671421 | 0.0093 | 0.004683   | 1.982      | best       | 31562  | 32153  | 3242509 |
| Etal     | Htel        | Hera | Htim        | 0.7373                          | 0.003179 | 100    | -    | 64393                           | 425847 | 6671421 | 0.7405 | 0.002888   | 100        | -          | 32120  | 215418 | 3242509 |
| Etal     | Hera        | Htel | Htim        | 0.7345                          | 0.00321  | 100    | -    | 65189                           | 425847 | 6671421 | 0.746  | 0.002376   | 100        | -          | 31345  | 215418 | 3242509 |
| Etal     | Htim        | Htel | Hera        | 0.0061                          | 0.003178 | 1.934  | best | 65189                           | 64393  | 6671421 | 0.0122 | 0.00462    | 2.645      | best       | 31345  | 32120  | 3242509 |
|          |             |      |             |                                 |          |        |      |                                 |        |         |        |            |            |            |        |        |         |

|      |            |            |            |        |          |        |      |        |        |         |        |          |        |      |       |        |         |
|------|------------|------------|------------|--------|----------|--------|------|--------|--------|---------|--------|----------|--------|------|-------|--------|---------|
| Etal | Htel       | Hhim       | Hmel       | 0.7383 | 0.003143 | 100    | -    | 64204  | 426486 | 6671421 | 0.7458 | 0.002465 | 100    | -    | 31428 | 215819 | 3242509 |
| Etal | Hhim       | Htel       | Hmel       | 0.734  | 0.003101 | 100    | -    | 65430  | 426486 | 6671421 | 0.7473 | 0.002327 | 100    | -    | 31221 | 215819 | 3242509 |
| Etal | Hmel       | Htel       | Hhim       | 0.0095 | 0.002686 | 3.522  | best | 65430  | 64204  | 6671421 | 0.0033 | 0.004506 | 0.734  | best | 31221 | 31428  | 3242509 |
| Etal | Htel       | HeraHhimHy | Hsar       | 0.0914 | 0.007569 | 12.072 | best | 86047  | 103349 | 6671421 | 0.0788 | 0.005949 | 13.251 | best | 42684 | 49987  | 3242509 |
| Etal | HeraHhimHy | Htel       | Hsar       | 0.1887 | 0.005948 | 31.733 | -    | 70534  | 103349 | 6671421 | 0.1766 | 0.005723 | 30.862 | -    | 34983 | 49987  | 3242509 |
| Etal | Hsar       | Htel       | HeraHhimHy | 0.0991 | 0.00488  | 20.306 | -    | 70534  | 86047  | 6671421 | 0.0992 | 0.004248 | 23.341 | -    | 34983 | 42684  | 3242509 |
| Etal | Htel       | HeraHhimHy | Hdem       | 0.0039 | 0.00916  | 0.427  | best | 85266  | 85928  | 6671421 | 0.0138 | 0.0073   | 1.89   | best | 42342 | 41186  | 3242509 |
| Etal | HeraHhimHy | Htel       | Hdem       | 0.1099 | 0.007671 | 14.332 | -    | 68913  | 85928  | 6671421 | 0.0964 | 0.006811 | 14.151 | -    | 33948 | 41186  | 3242509 |
| Etal | Hdem       | Htel       | HeraHhimHy | 0.1061 | 0.004917 | 21.574 | -    | 68913  | 85266  | 6671421 | 0.11   | 0.004807 | 22.89  | -    | 33948 | 42342  | 3242509 |
| Etal | Htel       | HeraHhimHy | Ldor       | 0.7383 | 0.003244 | 100    | -    | 66490  | 441517 | 6671421 | 0.7587 | 0.002323 | 100    | -    | 31981 | 233089 | 3242509 |
| Etal | HeraHhimHy | Htel       | Ldor       | 0.7404 | 0.003243 | 100    | -    | 65870  | 441517 | 6671421 | 0.7652 | 0.002237 | 100    | -    | 31002 | 233089 | 3242509 |
| Etal | Ldor       | Htel       | HeraHhimHy | 0.0047 | 0.003137 | 1.493  | best | 65870  | 66490  | 6671421 | 0.0155 | 0.00403  | 3.858  | best | 31002 | 31981  | 3242509 |
| Etal | Htel       | HeraHhimHy | Hbes       | 0.7382 | 0.003434 | 100    | -    | 64857  | 430554 | 6671421 | 0.7434 | 0.002642 | 100    | -    | 32092 | 218021 | 3242509 |
| Etal | HeraHhimHy | Htel       | Hbes       | 0.7344 | 0.003125 | 100    | -    | 65942  | 430554 | 6671421 | 0.7459 | 0.002383 | 100    | -    | 31728 | 218021 | 3242509 |
| Etal | Hbes       | Htel       | HeraHhimHy | 0.0083 | 0.00329  | 2.522  | best | 65942  | 64857  | 6671421 | 0.0057 | 0.004651 | 1.228  | best | 31728 | 32092  | 3242509 |
| Etal | Htel       | HeraHhimHy | Hpar       | 0.7387 | 0.003301 | 100    | -    | 64320  | 427869 | 6671421 | 0.744  | 0.00276  | 100    | -    | 31737 | 216170 | 3242509 |
| Etal | HeraHhimHy | Htel       | Hpar       | 0.7333 | 0.003126 | 100    | -    | 65852  | 427869 | 6671421 | 0.7454 | 0.002297 | 100    | -    | 31540 | 216170 | 3242509 |
| Etal | Hpar       | Htel       | HeraHhimHy | 0.0118 | 0.00285  | 4.131  | best | 65852  | 64320  | 6671421 | 0.0031 | 0.004667 | 0.669  | best | 31540 | 31737  | 3242509 |
| Etal | Htel       | HeraHhimHy | Hnum       | 0.7386 | 0.003485 | 100    | -    | 63978  | 425501 | 6671421 | 0.7437 | 0.002658 | 100    | -    | 31643 | 215283 | 3242509 |
| Etal | HeraHhimHy | Htel       | Hnum       | 0.733  | 0.003213 | 100    | -    | 65561  | 425501 | 6671421 | 0.7457 | 0.002276 | 100    | -    | 31357 | 215283 | 3242509 |
| Etal | Hnum       | Htel       | HeraHhimHy | 0.0122 | 0.002684 | 4.553  | best | 65561  | 63978  | 6671421 | 0.0045 | 0.004613 | 0.985  | best | 31357 | 31643  | 3242509 |
| Etal | Htel       | HeraHhimHy | Htim       | 0.739  | 0.003417 | 100    | -    | 63945  | 425933 | 6671421 | 0.7445 | 0.002669 | 100    | -    | 31580 | 215652 | 3242509 |
| Etal | HeraHhimHy | Htel       | Htim       | 0.7348 | 0.003109 | 100    | -    | 65129  | 425933 | 6671421 | 0.7464 | 0.002315 | 100    | -    | 31317 | 215652 | 3242509 |
| Etal | Htim       | Htel       | HeraHhimHy | 0.0092 | 0.003109 | 2.952  | best | 65129  | 63945  | 6671421 | 0.0042 | 0.004442 | 0.943  | best | 31317 | 31580  | 3242509 |
| Etal | Htel       | HeraHhimHy | Hcyd       | 0.739  | 0.003393 | 100    | -    | 63835  | 425177 | 6671421 | 0.7451 | 0.002642 | 100    | -    | 31442 | 215219 | 3242509 |
| Etal | HeraHhimHy | Htel       | Hcyd       | 0.7353 | 0.003202 | 100    | -    | 64868  | 425177 | 6671421 | 0.7472 | 0.00239  | 100    | -    | 31147 | 215219 | 3242509 |
| Etal | Hcyd       | Htel       | HeraHhimHy | 0.008  | 0.003155 | 2.545  | best | 64868  | 63835  | 6671421 | 0.0047 | 0.004536 | 1.04   | best | 31147 | 31442  | 3242509 |
| Etal | Htel       | HeraHhimHy | Hmel       | 0.7389 | 0.003338 | 100    | -    | 64072  | 426660 | 6671421 | 0.7451 | 0.002675 | 100    | -    | 31526 | 215822 | 3242509 |
| Etal | HeraHhimHy | Htel       | Hmel       | 0.7347 | 0.003264 | 100    | -    | 65272  | 426660 | 6671421 | 0.7475 | 0.00237  | 100    | -    | 31187 | 215822 | 3242509 |
| Etal | Hmel       | Htel       | HeraHhimHy | 0.0093 | 0.003047 | 3.046  | best | 65272  | 64072  | 6671421 | 0.0054 | 0.004628 | 1.169  | best | 31187 | 31526  | 3242509 |
| Etal | Htel       | Hsar       | Hdem       | 0.1427 | 0.003556 | 40.131 | best | 66620  | 49980  | 6671421 | 0.145  | 0.005177 | 28.012 | best | 33993 | 24934  | 3242509 |
| Etal | Hsar       | Htel       | Hdem       | 0.4939 | 0.003608 | 100    | -    | 147531 | 49980  | 6671421 | 0.5001 | 0.003856 | 100    | -    | 74829 | 24934  | 3242509 |
| Etal | Hdem       | Htel       | Hsar       | 0.3778 | 0.00349  | 100    | -    | 147531 | 66620  | 6671421 | 0.3829 | 0.004339 | 88.236 | -    | 74829 | 33993  | 3242509 |
| Etal | Htel       | Hsar       | Ldor       | 0.6957 | 0.002924 | 100    | -    | 78228  | 435953 | 6671421 | 0.719  | 0.002642 | 100    | -    | 37882 | 231687 | 3242509 |
| Etal | Hsar       | Htel       | Ldor       | 0.734  | 0.002136 | 100    | -    | 66872  | 435953 | 6671421 | 0.7579 | 0.002048 | 100    | -    | 31903 | 231687 | 3242509 |
| Etal | Ldor       | Htel       | Hsar       | 0.0783 | 0.003507 | 22.314 | best | 66872  | 78228  | 6671421 | 0.0857 | 0.003694 | 23.192 | best | 31903 | 37882  | 3242509 |
| Etal | Htel       | Hsar       | Hbes       | 0.6929 | 0.002908 | 100    | -    | 77231  | 425626 | 6671421 | 0.7005 | 0.00292  | 100    | -    | 38182 | 216808 | 3242509 |
| Etal | Hsar       | Htel       | Hbes       | 0.7353 | 0.002109 | 100    | -    | 64915  | 425626 | 6671421 | 0.7417 | 0.002217 | 100    | -    | 32157 | 216808 | 3242509 |
| Etal | Hbes       | Htel       | Hsar       | 0.0866 | 0.003828 | 22.635 | best | 64915  | 77231  | 6671421 | 0.0857 | 0.004195 | 20.42  | best | 32157 | 38182  | 3242509 |
| Etal | Htel       | Hsar       | Hpar       | 0.6929 | 0.002763 | 100    | -    | 76740  | 422987 | 6671421 | 0.7008 | 0.003044 | 100    | -    | 37814 | 214944 | 3242509 |
| Etal | Hsar       | Htel       | Hpar       | 0.736  | 0.002323 | 100    | -    | 64325  | 422987 | 6671421 | 0.7411 | 0.002412 | 100    | -    | 31968 | 214944 | 3242509 |
| Etal | Hpar       | Htel       | Hsar       | 0.088  | 0.003752 | 23.455 | best | 64325  | 76740  | 6671421 | 0.0838 | 0.004389 | 19.091 | best | 31968 | 37814  | 3242509 |
| Etal | Htel       | Hsar       | Hnum       | 0.692  | 0.002843 | 100    | -    | 76605  | 420826 | 6671421 | 0.7003 | 0.002967 | 100    | -    | 37732 | 214069 | 3242509 |
| Etal | Hsar       | Htel       | Hnum       | 0.7365 | 0.002401 | 100    | -    | 63858  | 420826 | 6671421 | 0.7414 | 0.002383 | 100    | -    | 31797 | 214069 | 3242509 |
| Etal | Hnum       | Htel       | Hsar       | 0.0907 | 0.003504 | 25.901 | best | 63858  | 76605  | 6671421 | 0.0854 | 0.003921 | 21.771 | best | 31797 | 37732  | 3242509 |
| Etal | Htel       | Hsar       | Htim       | 0.6928 | 0.002875 | 100    | -    | 76416  | 421102 | 6671421 | 0.7011 | 0.002873 | 100    | -    | 37676 | 214445 | 3242509 |
| Etal | Hsar       | Htel       | Htim       | 0.7363 | 0.002276 | 100    | -    | 63963  | 421102 | 6671421 | 0.7426 | 0.002297 | 100    | -    | 31677 | 214445 | 3242509 |
| Etal | Htim       | Htel       | Hsar       | 0.0887 | 0.003863 | 22.962 | best | 63963  | 76416  | 6671421 | 0.0865 | 0.003902 | 22.171 | best | 31677 | 37676  | 3242509 |
| Etal | Htel       | Hsar       | Hcyd       | 0.6927 | 0.002783 | 100    | -    | 76321  | 420361 | 6671421 | 0.7012 | 0.002842 | 100    | -    | 37605 | 214079 | 3242509 |
| Etal | Hsar       | Htel       | Hcyd       | 0.7367 | 0.002284 | 100    | -    | 63742  | 420361 | 6671421 | 0.743  | 0.002313 | 100    | -    | 31561 | 214079 | 3242509 |
| Etal | Hcyd       | Htel       | Hsar       | 0.0898 | 0.003759 | 23.891 | best | 63742  | 76321  | 6671421 | 0.0874 | 0.003827 | 22.835 | best | 31561 | 37605  | 3242509 |
| Etal | Htel       | Hsar       | Hmel       | 0.6932 | 0.002754 | 100    | -    | 76433  | 421719 | 6671421 | 0.7018 | 0.00298  | 100    | -    | 37610 | 214603 | 3242509 |
| Etel | Hsar       | Htel       | Hmel       | 0.7362 | 0.00223  | 100    | -    | 64074  | 421719 | 6671421 | 0.7432 | 0.002354 | 100    | -    | 31621 | 214603 | 3242509 |
| Etal | Hmel       | Htel       | Hsar       | 0.088  | 0.003789 | 23.212 | best | 64074  | 76433  | 6671421 | 0.0865 | 0.004222 | 20.49  | best | 31621 | 37610  | 3242509 |
| Etal | Htel       | Hdem       | Ldor       | 0.746  | 0.002043 | 100    | -    | 63726  | 438091 | 6671421 | 0.7674 | 0.001932 | 100    | -    | 30646 | 232910 | 3242509 |
| Etal | Hdem       | Htel       | Ldor       | 0.7551 | 0.002076 | 100    | -    | 61144  | 438091 | 6671421 | 0.7774 | 0.001814 | 100    | -    | 29169 | 232910 | 3242509 |
| Etal | Ldor       | Htel       | Hdem       | 0.0207 | 0.00278  | 7.437  | best | 61144  | 63726  | 6671421 | 0.0247 | 0.003277 | 7.537  | best | 29169 | 30646  | 3242509 |
| Etal | Htel       | Hdem       | Hbes       | 0.7447 | 0.002157 | 100    | -    | 62572  | 427607 | 6671421 | 0.7519 | 0.002192 | 100    | -    | 30865 | 217950 | 3242509 |
| Etal | Hdem       | Htel       | Hbes       | 0.7541 | 0.001973 | 100    | -    | 59961  | 427607 | 6671421 | 0.7609 | 0.001962 | 100    | -    | 29595 | 217950 | 3242509 |
| Etal | Hbes       | Htel       | Hdem       | 0.0213 | 0.00269  | 7.919  | best | 59961  | 62572  | 6671421 | 0.021  | 0.004748 | 4.424  | best | 29595 | 30865  | 3242509 |
| Etal | Htel       | Hdem       | Hpar       | 0.7449 | 0.002001 | 100    | -    | 62157  | 425044 | 6671421 | 0.7523 | 0.002209 | 100    | -    | 30548 | 216137 | 3242509 |
| Etal | Hdem       | Htel       | Hpar       | 0.7543 | 0.001972 | 100    | -    | 59526  | 425044 | 6671421 | 0.7621 | 0.001966 | 100    | -    | 29178 | 216137 | 3242509 |
| Etal | Hpar       | Htel       | Hdem       | 0.0216 | 0.002674 | 8.086  | best | 59526  | 62157  | 6671421 | 0.0229 | 0.004079 | 5.623  | best | 29178 | 30548  | 3242509 |
| Etal | Htel       | Hdem       | Hnum       | 0.7441 | 0.002024 | 100    | -    | 62060  | 422921 | 6671421 | 0.7521 | 0.002107 | 100    | -    | 30457 | 215253 | 3242509 |
| Etal | Hdem       | Htel       | Hnum       | 0.7544 | 0.002128 | 100    | -    | 59207  | 422921 | 6671421 | 0.7619 | 0.001915 | 100    | -    | 29090 | 215253 | 3242509 |
| Etal | Hnum       | Htel       | Hdem       | 0.0235 | 0.002441 | 9.638  | best | 59207  | 62060  | 6671421 | 0.023  | 0.003787 | 6.062  | best | 29090 | 30457  | 3242509 |
| Etal | Htel       | Hdem       | Htim       | 0.7453 | 0.002118 | 100    | -    | 61755  | 423081 | 6671421 | 0.7535 | 0.002139 | 100    | -    | 30304 | 215532 | 3242509 |
| Etal | Hdem       | Htel       | Htim       | 0.7548 | 0.002099 | 100    | -    | 59130  | 423081 | 6671421 | 0.7623 | 0.001914 | 100    | -    | 29078 | 215532 | 3242509 |
| Etal | Htim       | Htel       | Hdem       | 0.0217 | 0.00283  | 7.672  | best | 59130  | 61755  | 6671421 | 0.0206 | 0.003807 | 5.424  | best | 29078 | 30304  | 3242509 |
| Etal | Htel       | Hdem       | Hcyd       | 0.7452 | 0.002084 | 100    | -    | 61660  | 422340 | 6671421 | 0.7538 | 0.002129 | 100    | -    | 30196 | 215129 | 3242509 |
| Etal | Hdem       | Htel       | Hcyd       | 0.7546 | 0.00219  | 100    | -    | 59084  | 422340 | 6671421 | 0.7623 | 0.002044 | 100    | -    | 29020 | 215129 | 3242509 |
| Etal | Hcyd       | Htel       | Hdem       | 0.0213 | 0.00295  | 7.233  | best | 59084  | 61660  | 6671421 | 0.0199 | 0.003988 | 4.979  | best | 29020 | 30196  | 3242509 |



|      |             |      |             |        |          |             |        |        |         |        |          |             |        |        |         |
|------|-------------|------|-------------|--------|----------|-------------|--------|--------|---------|--------|----------|-------------|--------|--------|---------|
| Etal | Hbes        | Htel | Htim        | 0.8492 | 0.001532 | 100 -       | 574348 | 46839  | 6671421 | 0.853  | 0.002027 | 100 -       | 289322 | 22959  | 3242509 |
| Etal | Htim        | Htel | Hbes        | 0.8382 | 0.001932 | 100 -       | 574348 | 50548  | 6671421 | 0.842  | 0.002113 | 100 -       | 289322 | 24816  | 3242509 |
| Etal | Htel        | Hbes | Hcyd        | 0.0447 | 0.003362 | 13.308 best | 50844  | 46489  | 6671421 | 0.0451 | 0.004522 | 9.963 best  | 24960  | 22808  | 3242509 |
| Etal | Hbes        | Htel | Hcyd        | 0.8497 | 0.001664 | 100 -       | 571927 | 46489  | 6671421 | 0.8533 | 0.002109 | 100 -       | 288036 | 22808  | 3242509 |
| Etal | Hcyd        | Htel | Hbes        | 0.8367 | 0.001865 | 100 -       | 571927 | 50844  | 6671421 | 0.8405 | 0.002189 | 100 -       | 288036 | 24960  | 3242509 |
| Etal | Htel        | Hbes | Hmel        | 0.0316 | 0.003655 | 8.658 best  | 50669  | 47560  | 6671421 | 0.0343 | 0.005144 | 6.661 best  | 24643  | 23010  | 3242509 |
| Etal | Hbes        | Htel | Hmel        | 0.8472 | 0.001797 | 100 -       | 574835 | 47560  | 6671421 | 0.8528 | 0.002109 | 100 -       | 289526 | 23010  | 3242509 |
| Etal | Hmel        | Htel | Hbes        | 0.838  | 0.001774 | 100 -       | 574835 | 50669  | 6671421 | 0.8431 | 0.002087 | 100 -       | 289526 | 24643  | 3242509 |
| Etal | Htel        | Hpar | Hnum        | 0.0259 | 0.002232 | 11.608 best | 40118  | 38092  | 6671421 | 0.0206 | 0.00525  | 3.925 best  | 19634  | 18841  | 3242509 |
| Etal | Hpar        | Htel | Hnum        | 0.8836 | 0.001659 | 100 -       | 616247 | 38092  | 6671421 | 0.8848 | 0.002121 | 100 -       | 308191 | 18841  | 3242509 |
| Etal | Hnum        | Htel | Hpar        | 0.8778 | 0.00181  | 100 -       | 616247 | 40118  | 6671421 | 0.8802 | 0.001952 | 100 -       | 308191 | 19634  | 3242509 |
| Etal | Htel        | Hpar | Htim        | 0.0189 | 0.002452 | 7.695 best  | 42136  | 40575  | 6671421 | 0.009  | 0.004564 | 1.966 best  | 20297  | 19936  | 3242509 |
| Etal | Hpar        | Htel | Htim        | 0.8738 | 0.002398 | 100 -       | 602255 | 40575  | 6671421 | 0.8762 | 0.002195 | 100 -       | 301968 | 19936  | 3242509 |
| Etal | Htim        | Htel | Hpar        | 0.8693 | 0.002502 | 100 -       | 602255 | 42136  | 6671421 | 0.8741 | 0.002242 | 100 -       | 301968 | 20297  | 3242509 |
| Etal | Htel        | Hpar | Hcyd        | 0.0261 | 0.003136 | 8.33 best   | 43337  | 41130  | 6671421 | 0.016  | 0.004746 | 3.375 best  | 20792  | 20136  | 3242509 |
| Etal | Hpar        | Htel | Hcyd        | 0.8708 | 0.002501 | 100 -       | 595299 | 41130  | 6671421 | 0.8736 | 0.002367 | 100 -       | 298460 | 20136  | 3242509 |
| Etal | Hcyd        | Htel | Hpar        | 0.8643 | 0.002532 | 100 -       | 595299 | 43337  | 6671421 | 0.8698 | 0.002299 | 100 -       | 298460 | 20792  | 3242509 |
| Etal | Htel        | Hpar | Hmel        | 0.0117 | 0.003487 | 3.355 best  | 41564  | 40603  | 6671421 | 0.0035 | 0.005162 | 0.676 best  | 19712  | 19575  | 3242509 |
| Etal | Hpar        | Htel | Hmel        | 0.8743 | 0.002146 | 100 -       | 605381 | 40603  | 6671421 | 0.8789 | 0.002162 | 100 -       | 303598 | 19575  | 3242509 |
| Etal | Hmel        | Htel | Hpar        | 0.8715 | 0.002232 | 100 -       | 605381 | 41564  | 6671421 | 0.8781 | 0.002187 | 100 -       | 303598 | 19712  | 3242509 |
| Etal | Htel        | Hnum | Htim        | 0.0054 | 0.002479 | 2.174 best  | 42938  | 43403  | 6671421 | 0.0103 | 0.005446 | 1.884 best  | 20828  | 21260  | 3242509 |
| Etal | Hnum        | Htel | Htim        | 0.8618 | 0.001698 | 100 -       | 584601 | 43403  | 6671421 | 0.8652 | 0.001753 | 100 -       | 294029 | 21260  | 3242509 |
| Etal | Htim        | Htel | Hnum        | 0.8632 | 0.001757 | 100 -       | 584601 | 42938  | 6671421 | 0.8677 | 0.001963 | 100 -       | 294029 | 20828  | 3242509 |
| Etal | Htel        | Hnum | Hcyd        | 0.0021 | 0.003181 | 0.655 best  | 43497  | 43316  | 6671421 | 0.0032 | 0.004798 | 0.675 best  | 21058  | 21195  | 3242509 |
| Etal | Hnum        | Htel | Hcyd        | 0.8611 | 0.001705 | 100 -       | 580265 | 43316  | 6671421 | 0.8646 | 0.00177  | 100 -       | 291898 | 21195  | 3242509 |
| Etal | Hcyd        | Htel | Hnum        | 0.8605 | 0.001617 | 100 -       | 580265 | 43497  | 6671421 | 0.8654 | 0.001904 | 100 -       | 291898 | 21058  | 3242509 |
| Etal | Htel        | Hnum | Hmel        | 0.0123 | 0.00387  | 3.175 best  | 42845  | 43910  | 6671421 | 0.0158 | 0.004767 | 3.306 best  | 20498  | 21154  | 3242509 |
| Etal | Hnum        | Htel | Hmel        | 0.8606 | 0.001906 | 100 -       | 585806 | 43910  | 6671421 | 0.866  | 0.001888 | 100 -       | 294654 | 21154  | 3242509 |
| Etal | Hmel        | Htel | Hnum        | 0.8637 | 0.001603 | 100 -       | 585806 | 42845  | 6671421 | 0.8699 | 0.001876 | 100 -       | 294654 | 20498  | 3242509 |
| Etal | Htel        | Htim | Hcyd        | 0.0123 | 0.004388 | 2.813 best  | 26534  | 25888  | 6671421 | 0.0117 | 0.00592  | 1.983 best  | 12695  | 12400  | 3242509 |
| Etal | Htim        | Htel | Hcyd        | 0.9258 | 0.002286 | 100 -       | 672175 | 25888  | 6671421 | 0.9291 | 0.002093 | 100 -       | 337137 | 12400  | 3242509 |
| Etal | Hcyd        | Htel | Htim        | 0.9241 | 0.002364 | 100 -       | 672175 | 26534  | 6671421 | 0.9274 | 0.002028 | 100 -       | 337137 | 12695  | 3242509 |
| Etal | Htel        | Htim | Hmel        | 0.0105 | 0.005572 | 1.887 best  | 28138  | 28738  | 6671421 | 0.0081 | 0.006521 | 1.242 best  | 13716  | 13940  | 3242509 |
| Etal | Htim        | Htel | Hmel        | 0.9171 | 0.001799 | 100 -       | 664062 | 28738  | 6671421 | 0.9193 | 0.001655 | 100 -       | 331329 | 13940  | 3242509 |
| Etal | Hmel        | Htel | Htim        | 0.9187 | 0.001895 | 100 -       | 664062 | 28138  | 6671421 | 0.9205 | 0.001643 | 100 -       | 331329 | 13716  | 3242509 |
| Etal | Htel        | Hcyd | Hmel        | 0.0219 | 0.004473 | 4.901 best  | 27779  | 29025  | 6671421 | 0.0189 | 0.006343 | 2.972 best  | 13499  | 14018  | 3242509 |
| Etal | Hcyd        | Htel | Hmel        | 0.916  | 0.001638 | 100 -       | 661642 | 29025  | 6671421 | 0.9185 | 0.001577 | 100 -       | 329879 | 14018  | 3242509 |
| Etal | Hmel        | Htel | Hcyd        | 0.9194 | 0.00167  | 100 -       | 661642 | 27779  | 6671421 | 0.9214 | 0.001606 | 100 -       | 329879 | 13499  | 3242509 |
| Etal | Hhsa        | Hera | Hhim        | 0.0055 | 0.003708 | 1.474 best  | 38612  | 38192  | 6671421 | 0.0236 | 0.005216 | 4.53 best   | 19047  | 18167  | 3242509 |
| Etal | Hera        | Hhsa | Hhim        | 0.6825 | 0.003872 | 100 -       | 202350 | 38192  | 6671421 | 0.6865 | 0.004007 | 100 -       | 97740  | 18167  | 3242509 |
| Etal | Hera        | Hhsa | Hera        | 0.6795 | 0.003556 | 100 -       | 202350 | 38612  | 6671421 | 0.6738 | 0.003433 | 100 -       | 97740  | 19047  | 3242509 |
| Etal | Hhsa        | Hera | HeraHhimHyl | 0.0105 | 0.004143 | 2.543 best  | 28463  | 27866  | 6671421 | 0.0314 | 0.005565 | 5.646 best  | 14107  | 13247  | 3242509 |
| Etal | Hera        | Hhsa | HeraHhimHyl | 0.7952 | 0.007666 | 100 -       | 244199 | 27866  | 6671421 | 0.7985 | 0.005822 | 100 -       | 118200 | 13247  | 3242509 |
| Etal | HeraHhimHyl | Hhsa | Hera        | 0.7913 | 0.006875 | 100 -       | 244199 | 28463  | 6671421 | 0.7868 | 0.005823 | 100 -       | 118200 | 14107  | 3242509 |
| Etal | Hhsa        | Hera | Hsar        | 0.2262 | 0.017942 | 12.609 best | 84849  | 134452 | 6671421 | 0.2063 | 0.012366 | 16.681 best | 42241  | 64193  | 3242509 |
| Etal | Hera        | Hhsa | Hsar        | 0.3618 | 0.009951 | 36.364 best | 63018  | 134452 | 6671421 | 0.3408 | 0.007148 | 47.672 best | 31566  | 64193  | 3242509 |
| Etal | Hsar        | Hhsa | Hera        | 0.1478 | 0.008539 | 17.304 best | 63018  | 84849  | 6671421 | 0.1447 | 0.006436 | 22.481 best | 31566  | 42241  | 3242509 |
| Etal | Hhsa        | Hera | Hdem        | 0.165  | 0.019265 | 8.567 best  | 83862  | 117010 | 6671421 | 0.1435 | 0.013448 | 10.673 best | 41658  | 55618  | 3242509 |
| Etal | Hera        | Hhsa | Hdem        | 0.3125 | 0.011035 | 28.317 best | 61308  | 117010 | 6671421 | 0.2881 | 0.007869 | 36.612 best | 30743  | 55618  | 3242509 |
| Etal | Hdem        | Hhsa | Hera        | 0.1555 | 0.008453 | 18.395 best | 61308  | 83862  | 6671421 | 0.1508 | 0.006536 | 23.077 best | 30743  | 41658  | 3242509 |
| Etal | Hhsa        | Hera | Ldor        | 0.7704 | 0.00225  | 100 -       | 61771  | 476173 | 6671421 | 0.7871 | 0.001866 | 100 -       | 29705  | 249384 | 3242509 |
| Etal | Hera        | Hhsa | Ldor        | 0.7694 | 0.002515 | 100 -       | 62064  | 476173 | 6671421 | 0.787  | 0.001604 | 100 -       | 29728  | 249384 | 3242509 |
| Etal | Ldor        | Hhsa | Hera        | 0.0024 | 0.003008 | 0.786 best  | 62064  | 61771  | 6671421 | 0.0004 | 0.003607 | 0.106 best  | 29728  | 29705  | 3242509 |
| Etal | Hhsa        | Hera | Hbes        | 0.7707 | 0.002084 | 100 -       | 60224  | 465124 | 6671421 | 0.7736 | 0.002208 | 100 -       | 29908  | 234305 | 3242509 |
| Etal | Hera        | Hhsa | Hbes        | 0.7649 | 0.002243 | 100 -       | 61962  | 465124 | 6671421 | 0.7695 | 0.00179  | 100 -       | 30519  | 234305 | 3242509 |
| Etal | Hbes        | Hhsa | Hera        | 0.0142 | 0.002601 | 5.468 best  | 61962  | 60224  | 6671421 | 0.0101 | 0.00423  | 2.389 best  | 30519  | 29908  | 3242509 |
| Etal | Hhsa        | Hera | Hpar        | 0.7713 | 0.002192 | 100 -       | 59682  | 462164 | 6671421 | 0.7744 | 0.002232 | 100 -       | 29560  | 232445 | 3242509 |
| Etal | Hera        | Hhsa | Hpar        | 0.7645 | 0.00238  | 100 -       | 61693  | 462164 | 6671421 | 0.7696 | 0.001886 | 100 -       | 30268  | 232445 | 3242509 |
| Etal | Hpar        | Hhsa | Hera        | 0.0166 | 0.002475 | 6.696 best  | 61693  | 59682  | 6671421 | 0.0118 | 0.004084 | 2.897 best  | 30268  | 29560  | 3242509 |
| Etal | Hhsa        | Hera | Hnum        | 0.7715 | 0.002334 | 100 -       | 59330  | 459953 | 6671421 | 0.7741 | 0.002227 | 100 -       | 29477  | 231505 | 3242509 |
| Etal | Hera        | Hhsa | Hnum        | 0.7636 | 0.002375 | 100 -       | 61657  | 459953 | 6671421 | 0.7695 | 0.001738 | 100 -       | 30156  | 231505 | 3242509 |
| Etal | Hnum        | Hhsa | Hera        | 0.0192 | 0.002981 | 6.451 best  | 61657  | 59330  | 6671421 | 0.0114 | 0.00417  | 2.729 best  | 30156  | 29477  | 3242509 |
| Etal | Hhsa        | Hera | Htim        | 0.7711 | 0.002325 | 100 -       | 59526  | 460541 | 6671421 | 0.7742 | 0.002337 | 100 -       | 29526  | 232042 | 3242509 |
| Etal | Hera        | Hhsa | Htim        | 0.7654 | 0.002417 | 100 -       | 61197  | 460541 | 6671421 | 0.7705 | 0.001843 | 100 -       | 30077  | 232042 | 3242509 |
| Etal | Htim        | Hhsa | Hera        | 0.0138 | 0.002616 | 5.291 best  | 61197  | 59526  | 6671421 | 0.0092 | 0.004237 | 2.18 best   | 30077  | 29526  | 3242509 |
| Etal | Hhsa        | Hera | Hcyd        | 0.7715 | 0.002234 | 100 -       | 59321  | 459809 | 6671421 | 0.7749 | 0.002229 | 100 -       | 29379  | 231622 | 3242509 |
| Etal | Hera        | Hhsa | Hcyd        | 0.7652 | 0.00245  | 100 -       | 61156  | 459809 | 6671421 | 0.7705 | 0.001732 | 100 -       | 30025  | 231622 | 3242509 |
| Etal | Hcyd        | Hhsa | Hera        | 0.0152 | 0.002441 | 6.242 best  | 61156  | 59321  | 6671421 | 0.0109 | 0.004128 | 2.633 best  | 30025  | 29379  | 3242509 |
| Etal | Hhsa        | Hera | Hmel        | 0.7716 | 0.002254 | 100 -       | 59461  | 461229 | 6671421 | 0.7757 | 0.002204 | 100 -       | 29329  | 232229 | 3242509 |
| Etal | Hera        | Hhsa | Hmel        | 0.765  | 0.002511 | 100 -       | 61413  | 461229 | 6671421 | 0.771  | 0.001837 | 100 -       | 30035  | 232229 | 3242509 |
| Etal | Hmel        | Hhsa | Hera        | 0.0162 | 0.002535 | 6.373 best  | 61413  | 59461  | 6671421 | 0.0119 | 0.004152 | 2.864 best  | 30035  | 29329  | 3242509 |
| Etal | Hhsa        | Hhim | HeraHhimHyl | 0.0039 | 0.004647 | 0.849 best  | 22713  | 22536  | 6671421 | 0.0009 | 0.006001 | 0.147 best  | 10752  | 10772  | 3242509 |
| Etal | Hhim        | Hhsa | HeraHhimHyl | 0.844  | 0.003011 | 100 -       | 266408 | 22536  | 6671421 | 0.8458 | 0.003986 | 100 -       | 128874 | 10772  | 3242509 |
| Etal | HeraHhimHyl | Hhsa | Hhim        | 0.8429 | 0.003681 | 100 -       | 266408 | 22713  | 6671421 | 0.846  | 0.004277 | 100 -       | 128874 | 10752  | 3242509 |
| Etal | Hhsa        | Hhim | Hsar        | 0.2289 | 0.017858 | 12.818 best | 84273  | 134296 | 6671421 | 0.216  | 0.012391 | 17.434 best | 41437  | 64269  | 3242509 |
| Etal | Hhim        | Hhsa | Hsar        | 0.3627 | 0.010159 | 35.699 best | 62823  | 134296 | 6671421 | 0.3438 | 0.007314 | 47.003 best | 31389  | 6      |         |

|      |            |            |            |        |          |             |        |        |         |        |          |             |       |        |         |
|------|------------|------------|------------|--------|----------|-------------|--------|--------|---------|--------|----------|-------------|-------|--------|---------|
| Etal | Hmel       | Hhsa       | Hhim       | 0.0187 | 0.002535 | 7.383 best  | 61355  | 59101  | 6671421 | 0.0218 | 0.004504 | 4.845 best  | 29939 | 28660  | 3242509 |
| Etal | Hhsa       | HeraHhimHy | Hsar       | 0.2298 | 0.01783  | 12.888 best | 84150  | 134350 | 6671421 | 0.2152 | 0.012384 | 17.381 best | 41592 | 64404  | 3242509 |
| Etal | HeraHhimHy | Hhsa       | Hsar       | 0.3631 | 0.010264 | 35.379 -    | 62786  | 134350 | 6671421 | 0.3442 | 0.007278 | 47.3 -      | 31422 | 64404  | 3242509 |
| Etal | Hsar       | Hhsa       | HeraHhimHy | 0.1455 | 0.008366 | 17.393 -    | 62786  | 84150  | 6671421 | 0.1393 | 0.00641  | 21.739 -    | 31422 | 41592  | 3242509 |
| Etal | Hhsa       | HeraHhimHy | Hdem       | 0.1689 | 0.019172 | 8.809 best  | 83046  | 116791 | 6671421 | 0.1533 | 0.013477 | 11.375 best | 40937 | 55757  | 3242509 |
| Etal | HeraHhimHy | Hhsa       | Hdem       | 0.3137 | 0.01131  | 27.737 -    | 61027  | 116791 | 6671421 | 0.2923 | 0.007903 | 36.984 -    | 30541 | 55757  | 3242509 |
| Etal | Hdem       | Hhsa       | HeraHhimHy | 0.153  | 0.008199 | 18.655 -    | 61027  | 83046  | 6671421 | 0.1455 | 0.006485 | 22.437 -    | 30541 | 40937  | 3242509 |
| Etal | Hhsa       | HeraHhimHy | Ldor       | 0.7723 | 0.002055 | 100 -       | 61167  | 476166 | 6671421 | 0.7912 | 0.001652 | 100 -       | 29103 | 249642 | 3242509 |
| Etal | HeraHhimHy | Hhsa       | Ldor       | 0.7704 | 0.002527 | 100 -       | 61770  | 476166 | 6671421 | 0.7881 | 0.001787 | 100 -       | 29577 | 249642 | 3242509 |
| Etal | Ldor       | Hhsa       | HeraHhimHy | 0.0049 | 0.003095 | 1.587 best  | 61770  | 61167  | 6671421 | 0.0081 | 0.004129 | 1.957 best  | 29577 | 29103  | 3242509 |
| Etal | Hhsa       | HeraHhimHy | Hbes       | 0.7727 | 0.001898 | 100 -       | 59638  | 465135 | 6671421 | 0.7777 | 0.001989 | 100 -       | 29331 | 234588 | 3242509 |
| Etal | HeraHhimHy | Hhsa       | Hbes       | 0.7655 | 0.002158 | 100 -       | 61774  | 465135 | 6671421 | 0.7711 | 0.001907 | 100 -       | 30317 | 234588 | 3242509 |
| Etal | Hbes       | Hhsa       | HeraHhimHy | 0.0176 | 0.002753 | 6.392 best  | 61774  | 59638  | 6671421 | 0.0165 | 0.00443  | 3.731 best  | 30317 | 29331  | 3242509 |
| Etal | Hhsa       | HeraHhimHy | Hpar       | 0.7731 | 0.001975 | 100 -       | 59163  | 462242 | 6671421 | 0.7786 | 0.002023 | 100 -       | 28970 | 232715 | 3242509 |
| Etal | HeraHhimHy | Hhsa       | Hpar       | 0.7652 | 0.002467 | 100 -       | 61476  | 462242 | 6671421 | 0.7709 | 0.001982 | 100 -       | 30107 | 232715 | 3242509 |
| Etal | Hpar       | Hhsa       | HeraHhimHy | 0.0192 | 0.002781 | 6.898 best  | 61476  | 59163  | 6671421 | 0.0192 | 0.004418 | 4.356 best  | 30107 | 28970  | 3242509 |
| Etal | Hhsa       | HeraHhimHy | Hnum       | 0.7735 | 0.002089 | 100 -       | 58744  | 459964 | 6671421 | 0.7783 | 0.002034 | 100 -       | 28904 | 231792 | 3242509 |
| Etal | HeraHhimHy | Hhsa       | Hnum       | 0.7649 | 0.002268 | 100 -       | 61275  | 459964 | 6671421 | 0.7716 | 0.001889 | 100 -       | 29888 | 231792 | 3242509 |
| Etal | Hnum       | Hhsa       | HeraHhimHy | 0.0211 | 0.002849 | 7.403 best  | 61275  | 58744  | 6671421 | 0.0167 | 0.004523 | 3.7 best    | 29888 | 28904  | 3242509 |
| Etal | Hhsa       | HeraHhimHy | Htim       | 0.7732 | 0.002077 | 100 -       | 58914  | 460526 | 6671421 | 0.7787 | 0.00208  | 100 -       | 28907 | 232283 | 3242509 |
| Etal | HeraHhimHy | Hhsa       | Htim       | 0.7662 | 0.002378 | 100 -       | 60973  | 460526 | 6671421 | 0.7714 | 0.001946 | 100 -       | 29970 | 232283 | 3242509 |
| Etal | Htim       | Hhsa       | HeraHhimHy | 0.0172 | 0.003153 | 5.449 best  | 60973  | 58914  | 6671421 | 0.0181 | 0.004553 | 3.964 best  | 29970 | 28907  | 3242509 |
| Etal | Hhsa       | HeraHhimHy | Hcyd       | 0.7735 | 0.001975 | 100 -       | 58724  | 459809 | 6671421 | 0.7792 | 0.001937 | 100 -       | 28785 | 231888 | 3242509 |
| Etal | HeraHhimHy | Hhsa       | Hcyd       | 0.7666 | 0.002476 | 100 -       | 60751  | 459809 | 6671421 | 0.772  | 0.001894 | 100 -       | 29838 | 231888 | 3242509 |
| Etal | Hcyd       | Hhsa       | HeraHhimHy | 0.017  | 0.00308  | 5.51 best   | 60751  | 58724  | 6671421 | 0.018  | 0.004258 | 4.219 best  | 29838 | 28785  | 3242509 |
| Etal | Hhsa       | HeraHhimHy | Hmel       | 0.7737 | 0.002012 | 100 -       | 58849  | 461214 | 6671421 | 0.7801 | 0.001972 | 100 -       | 28711 | 232471 | 3242509 |
| Etal | HeraHhimHy | Hhsa       | Hmel       | 0.7661 | 0.002513 | 100 -       | 61077  | 461214 | 6671421 | 0.7724 | 0.001927 | 100 -       | 29858 | 232471 | 3242509 |
| Etal | Hmel       | Hhsa       | HeraHhimHy | 0.0186 | 0.002771 | 6.707 best  | 61077  | 58849  | 6671421 | 0.0196 | 0.004459 | 4.392 best  | 29858 | 28711  | 3242509 |
| Etal | Hhsa       | Hsar       | Hdem       | 0.1332 | 0.003745 | 35.571 best | 69992  | 53537  | 6671421 | 0.1334 | 0.004365 | 30.548 best | 33962 | 25970  | 3242509 |
| Etal | Hsar       | Hhsa       | Hdem       | 0.4614 | 0.006919 | 66.679 -    | 145237 | 53537  | 6671421 | 0.4773 | 0.004998 | 95.5 -      | 73396 | 25970  | 3242509 |
| Etal | Hdem       | Hhsa       | Hsar       | 0.3496 | 0.00674  | 51.871 -    | 145237 | 69992  | 6671421 | 0.3673 | 0.005213 | 70.468 -    | 73396 | 33962  | 3242509 |
| Etal | Hhsa       | Hsar       | Ldor       | 0.6949 | 0.003823 | 100 -       | 80097  | 444896 | 6671421 | 0.7217 | 0.003041 | 100 -       | 38133 | 235860 | 3242509 |
| Etal | Hsar       | Hhsa       | Ldor       | 0.7282 | 0.003117 | 100 -       | 69964  | 444896 | 6671421 | 0.7506 | 0.00244  | 100 -       | 33607 | 235860 | 3242509 |
| Etal | Ldor       | Hhsa       | Hsar       | 0.0675 | 0.003512 | 19.228 best | 69964  | 80097  | 6671421 | 0.0631 | 0.003458 | 18.244 best | 33607 | 38133  | 3242509 |
| Etal | Hhsa       | Hsar       | Hbes       | 0.6917 | 0.004003 | 100 -       | 79209  | 434506 | 6671421 | 0.7029 | 0.003283 | 100 -       | 38559 | 221004 | 3242509 |
| Etal | Hsar       | Hhsa       | Hbes       | 0.7296 | 0.003268 | 100 -       | 67944  | 434506 | 6671421 | 0.7341 | 0.0027   | 100 -       | 33884 | 221004 | 3242509 |
| Etal | Hbes       | Hhsa       | Hsar       | 0.0766 | 0.003562 | 21.495 best | 67944  | 79209  | 6671421 | 0.0645 | 0.003342 | 19.313 best | 33884 | 38559  | 3242509 |
| Etal | Hhsa       | Hsar       | Hpar       | 0.6912 | 0.003937 | 100 -       | 78829  | 431708 | 6671421 | 0.703  | 0.003398 | 100 -       | 38218 | 219151 | 3242509 |
| Etal | Hsar       | Hhsa       | Hpar       | 0.7307 | 0.003478 | 100 -       | 67195  | 431708 | 6671421 | 0.7334 | 0.002845 | 100 -       | 33706 | 219151 | 3242509 |
| Etal | Hpar       | Hhsa       | Hsar       | 0.0797 | 0.003301 | 24.14 best  | 67195  | 78829  | 6671421 | 0.0627 | 0.003602 | 17.417 best | 33706 | 38218  | 3242509 |
| Etal | Hhsa       | Hnum       | Hsar       | 0.6908 | 0.003991 | 100 -       | 78576  | 429596 | 6671421 | 0.7025 | 0.003284 | 100 -       | 38128 | 218204 | 3242509 |
| Etal | Hsar       | Hhsa       | Hnum       | 0.731  | 0.003415 | 100 -       | 66777  | 429596 | 6671421 | 0.7341 | 0.002858 | 100 -       | 33463 | 218204 | 3242509 |
| Etal | Hnum       | Hhsa       | Hsar       | 0.0812 | 0.003344 | 24.275 best | 66777  | 78576  | 6671421 | 0.0652 | 0.003112 | 20.941 best | 33463 | 38128  | 3242509 |
| Etal | Hhsa       | Hsar       | Htim       | 0.6911 | 0.004034 | 100 -       | 78548  | 429660 | 6671421 | 0.703  | 0.003305 | 100 -       | 38139 | 218703 | 3242509 |
| Etal | Hsar       | Hhsa       | Htim       | 0.7305 | 0.003353 | 100 -       | 66970  | 429660 | 6671421 | 0.7346 | 0.002712 | 100 -       | 33466 | 218703 | 3242509 |
| Etal | Htim       | Hhsa       | Hsar       | 0.0796 | 0.003408 | 23.346 best | 66970  | 78548  | 6671421 | 0.0653 | 0.003332 | 19.59 best  | 33466 | 38139  | 3242509 |
| Etal | Hhsa       | Hsar       | Hcyd       | 0.6915 | 0.003999 | 100 -       | 78285  | 429170 | 6671421 | 0.7034 | 0.003258 | 100 -       | 38011 | 218302 | 3242509 |
| Etal | Hsar       | Hhsa       | Hcyd       | 0.731  | 0.003347 | 100 -       | 66700  | 429170 | 6671421 | 0.7352 | 0.002797 | 100 -       | 33315 | 218302 | 3242509 |
| Etal | Hcyd       | Hhsa       | Hsar       | 0.0799 | 0.003234 | 24.71 best  | 66700  | 78285  | 6671421 | 0.0658 | 0.003144 | 20.944 best | 33315 | 38011  | 3242509 |
| Etal | Hhsa       | Hmel       | Hmel       | 0.692  | 0.003934 | 100 -       | 78385  | 430550 | 6671421 | 0.7046 | 0.003347 | 100 -       | 37942 | 218890 | 3242509 |
| Etal | Hsar       | Hhsa       | Hmel       | 0.7305 | 0.003343 | 100 -       | 67054  | 430550 | 6671421 | 0.735  | 0.002864 | 100 -       | 33439 | 218890 | 3242509 |
| Etal | Hmel       | Hhsa       | Hsar       | 0.0779 | 0.003417 | 22.801 best | 67054  | 78385  | 6671421 | 0.0631 | 0.003367 | 18.738 best | 33439 | 37942  | 3242509 |
| Etal | Hhsa       | Hdem       | Ldor       | 0.744  | 0.00306  | 100 -       | 65602  | 446856 | 6671421 | 0.7679 | 0.00242  | 100 -       | 31092 | 236811 | 3242509 |
| Etal | Hdem       | Hhsa       | Ldor       | 0.7486 | 0.00321  | 100 -       | 64243  | 446856 | 6671421 | 0.7681 | 0.002364 | 100 -       | 31068 | 236811 | 3242509 |
| Etal | Ldor       | Hhsa       | Hdem       | 0.0105 | 0.003269 | 3.201 best  | 64243  | 65602  | 6671421 | 0.0004 | 0.003396 | 0.115 best  | 31068 | 31092  | 3242509 |
| Etal | Hhsa       | Hdem       | Hbes       | 0.7423 | 0.003286 | 100 -       | 64550  | 436302 | 6671421 | 0.7522 | 0.002745 | 100 -       | 31374 | 221811 | 3242509 |
| Etal | Hdem       | Hhsa       | Hbes       | 0.7477 | 0.003061 | 100 -       | 62990  | 436302 | 6671421 | 0.7516 | 0.002421 | 100 -       | 31454 | 221811 | 3242509 |
| Etal | Hbes       | Hhsa       | Hdem       | 0.0122 | 0.00255  | 4.799 best  | 62990  | 64550  | 6671421 | 0.0013 | 0.004021 | 0.301 best  | 31454 | 31374  | 3242509 |
| Etal | Hhsa       | Hdem       | Hpar       | 0.7419 | 0.003257 | 100 -       | 64268  | 433602 | 6671421 | 0.7524 | 0.002794 | 100 -       | 31088 | 220013 | 3242509 |
| Etal | Hdem       | Hhsa       | Hpar       | 0.7484 | 0.003087 | 100 -       | 62418  | 433602 | 6671421 | 0.7527 | 0.002514 | 100 -       | 31052 | 220013 | 3242509 |
| Etal | Hpar       | Hhsa       | Hdem       | 0.0146 | 0.003085 | 4.737 best  | 62418  | 64268  | 6671421 | 0.0006 | 0.004305 | 0.136 best  | 31052 | 31088  | 3242509 |
| Etal | Hhsa       | Hdem       | Hnum       | 0.7416 | 0.003286 | 100 -       | 64032  | 431507 | 6671421 | 0.7522 | 0.002682 | 100 -       | 30974 | 219042 | 3242509 |
| Etal | Hdem       | Hhsa       | Hnum       | 0.7483 | 0.003109 | 100 -       | 62127  | 431507 | 6671421 | 0.7529 | 0.002436 | 100 -       | 30877 | 219042 | 3242509 |
| Etal | Hnum       | Hhsa       | Hdem       | 0.0151 | 0.002899 | 5.211 best  | 62127  | 64032  | 6671421 | 0.0016 | 0.004118 | 0.383 best  | 30877 | 30974  | 3242509 |
| Etal | Hhsa       | Hdem       | Htim       | 0.7422 | 0.003336 | 100 -       | 63897  | 431764 | 6671421 | 0.7533 | 0.002737 | 100 -       | 30885 | 219441 | 3242509 |
| Etal | Hdem       | Hhsa       | Htim       | 0.7484 | 0.003082 | 100 -       | 62147  | 431764 | 6671421 | 0.7526 | 0.00231  | 100 -       | 30985 | 219441 | 3242509 |
| Etal | Htim       | Hhsa       | Hdem       | 0.0139 | 0.003281 | 4.235 best  | 62147  | 63897  | 6671421 | 0.0016 | 0.003927 | 0.409 best  | 30985 | 30885  | 3242509 |
| Etal | Hhsa       | Hdem       | Hcyd       | 0.7427 | 0.003347 | 100 -       | 63629  | 430969 | 6671421 | 0.754  | 0.002735 | 100 -       | 30722 | 219005 | 3242509 |
| Etal | Hdem       | Hhsa       | Hcyd       | 0.7483 | 0.003211 | 100 -       | 62047  | 430969 | 6671421 | 0.7528 | 0.002529 | 100 -       | 30894 | 219005 | 3242509 |
| Etal | Hcyd       | Hhsa       | Hdem       | 0.0126 | 0.00314  | 4.012 best  | 62047  | 63629  | 6671421 | 0.0028 | 0.003958 | 0.704 best  | 30894 | 30722  | 3242509 |
| Etal | Hhsa       | Hdem       | Hmel       | 0.7428 | 0.003283 | 100 -       | 63835  | 432455 | 6671421 | 0.7546 | 0.002785 | 100 -       | 30723 | 219663 | 3242509 |
| Etal | Hdem       | Hhsa       | Hmel       | 0.7486 | 0.003219 | 100 -       | 62169  | 432455 | 6671421 | 0.7532 | 0.002468 | 100 -       | 30924 | 219663 | 3242509 |
| Etal | Hmel       | Hhsa       | Hdem       | 0.0132 | 0.002948 | 4.487 best  | 62169  | 63835  | 6671421 | 0.0033 | 0.003837 | 0.848 best  | 30924 | 30723  | 3242509 |
| Etal | Hhsa       | Ldor       | Hbes       | 0.0377 | 0.003342 | 11.282 best | 130775 | 121273 | 6671421 | 0.1126 | 0.003759 | 29.957 best | 75499 | 60217  | 3242509 |
| Etal | Ldor       | Hhsa       | Hbes       | 0.3937 | 0.004498 | 87.521 -    | 278744 | 121273 | 6671421 | 0.3898 | 0.003943 | 98.         |       |        |         |

|      |             |             |             |        |          |             |        |        |         |        |          |            |        |        |         |
|------|-------------|-------------|-------------|--------|----------|-------------|--------|--------|---------|--------|----------|------------|--------|--------|---------|
| Etal | Hhsa        | Hbes        | Hcyd        | 0.0447 | 0.003214 | 13.897 best | 51589  | 47177  | 6671421 | 0.0447 | 0.00475  | 9.411 best | 25169  | 23015  | 3242509 |
| Etal | Hbes        | Hhsa        | Hcyd        | 0.848  | 0.001712 | 100 -       | 573666 | 47177  | 6671421 | 0.8528 | 0.002039 | 100 -      | 289593 | 23015  | 3242509 |
| Etal | Hcyd        | Hhsa        | Hbes        | 0.835  | 0.001907 | 100 -       | 573666 | 51589  | 6671421 | 0.8401 | 0.002066 | 100 -      | 289593 | 25169  | 3242509 |
| Etal | Hhsa        | Hbes        | Hmel        | 0.0314 | 0.003775 | 8.324 best  | 51398  | 48266  | 6671421 | 0.0312 | 0.005413 | 5.758 best | 24760  | 23263  | 3242509 |
| Etal | Hbes        | Hhsa        | Hmel        | 0.8455 | 0.001777 | 100 -       | 576592 | 48266  | 6671421 | 0.852  | 0.002105 | 100 -      | 291129 | 23263  | 3242509 |
| Etal | Hmel        | Hhsa        | Hbes        | 0.8363 | 0.001889 | 100 -       | 576592 | 51398  | 6671421 | 0.8432 | 0.002023 | 100 -      | 291129 | 24760  | 3242509 |
| Etal | Hhsa        | Hpar        | Hnum        | 0.0234 | 0.00287  | 8.156 best  | 40638  | 38779  | 6671421 | 0.022  | 0.005628 | 3.909 best | 19904  | 19047  | 3242509 |
| Etal | Hpar        | Hhsa        | Hnum        | 0.8819 | 0.001716 | 100 -       | 617715 | 38779  | 6671421 | 0.8841 | 0.002074 | 100 -      | 309731 | 19047  | 3242509 |
| Etal | Hnum        | Hhsa        | Hpar        | 0.8766 | 0.001864 | 100 -       | 617715 | 40638  | 6671421 | 0.8792 | 0.001976 | 100 -      | 309731 | 19904  | 3242509 |
| Etal | Hhsa        | Hpar        | Htim        | 0.0174 | 0.003127 | 5.579 best  | 42778  | 41311  | 6671421 | 0.009  | 0.004526 | 1.999 best | 20577  | 20208  | 3242509 |
| Etal | Hpar        | Hhsa        | Htim        | 0.8719 | 0.002359 | 100 -       | 603772 | 41311  | 6671421 | 0.8752 | 0.002076 | 100 -      | 303574 | 20208  | 3242509 |
| Etal | Htim        | Hhsa        | Hpar        | 0.8677 | 0.002522 | 100 -       | 603772 | 42778  | 6671421 | 0.8731 | 0.002173 | 100 -      | 303574 | 20577  | 3242509 |
| Etal | Hhsa        | Hpar        | Hcyd        | 0.0233 | 0.002783 | 8.362 best  | 43831  | 41837  | 6671421 | 0.0155 | 0.004632 | 3.351 best | 20998  | 20356  | 3242509 |
| Etal | Hpar        | Hhsa        | Hcyd        | 0.869  | 0.002457 | 100 -       | 596787 | 41837  | 6671421 | 0.8729 | 0.002286 | 100 -      | 300014 | 20356  | 3242509 |
| Etal | Hcyd        | Hhsa        | Hpar        | 0.8632 | 0.002545 | 100 -       | 596787 | 43831  | 6671421 | 0.8692 | 0.002249 | 100 -      | 300014 | 20998  | 3242509 |
| Etal | Hhsa        | Hpar        | Hmel        | 0.0086 | 0.004146 | 2.067 best  | 42039  | 41325  | 6671421 | 0.0004 | 0.005125 | 0.073 best | 19823  | 19838  | 3242509 |
| Etal | Hpar        | Hhsa        | Hmel        | 0.8725 | 0.002092 | 100 -       | 606884 | 41325  | 6671421 | 0.878  | 0.002077 | 100 -      | 305195 | 19838  | 3242509 |
| Etal | Hmel        | Hhsa        | Hpar        | 0.8705 | 0.002297 | 100 -       | 606884 | 42039  | 6671421 | 0.878  | 0.002127 | 100 -      | 305195 | 19823  | 3242509 |
| Etal | Hhsa        | Hnum        | Htim        | 0.0045 | 0.002892 | 1.546 best  | 43663  | 44055  | 6671421 | 0.0115 | 0.005834 | 1.965 best | 21053  | 21541  | 3242509 |
| Etal | Hnum        | Hhsa        | Htim        | 0.8602 | 0.001758 | 100 -       | 586201 | 44055  | 6671421 | 0.8642 | 0.001832 | 100 -      | 295580 | 21541  | 3242509 |
| Etal | Htim        | Hhsa        | Hnum        | 0.8614 | 0.001773 | 100 -       | 586201 | 43663  | 6671421 | 0.867  | 0.001897 | 100 -      | 295580 | 21053  | 3242509 |
| Etal | Hhsa        | Hnum        | Hcyd        | 0.0015 | 0.003294 | 0.465 best  | 44128  | 43993  | 6671421 | 0.005  | 0.005003 | 1.008 best | 21209  | 21424  | 3242509 |
| Etal | Hnum        | Hhsa        | Hcyd        | 0.8594 | 0.001739 | 100 -       | 581890 | 43993  | 6671421 | 0.8639 | 0.001809 | 100 -      | 293397 | 21424  | 3242509 |
| Etal | Hcyd        | Hhsa        | Hnum        | 0.859  | 0.001671 | 100 -       | 581890 | 44128  | 6671421 | 0.8652 | 0.00183  | 100 -      | 293397 | 21209  | 3242509 |
| Etal | Hhsa        | Hnum        | Hmel        | 0.013  | 0.004346 | 2.997 best  | 43396  | 44541  | 6671421 | 0.0207 | 0.005054 | 4.105 best | 20585  | 21457  | 3242509 |
| Etal | Hnum        | Hhsa        | Hmel        | 0.859  | 0.00188  | 100 -       | 587385 | 44541  | 6671421 | 0.8649 | 0.001905 | 100 -      | 296227 | 21457  | 3242509 |
| Etal | Hmel        | Hhsa        | Hnum        | 0.8624 | 0.001753 | 100 -       | 587385 | 43396  | 6671421 | 0.8701 | 0.001854 | 100 -      | 296227 | 20585  | 3242509 |
| Etal | Hhsa        | Htim        | Hcyd        | 0.0099 | 0.004761 | 2.085 best  | 26907  | 26380  | 6671421 | 0.0108 | 0.006491 | 1.659 best | 12791  | 12518  | 3242509 |
| Etal | Htim        | Hhsa        | Hcyd        | 0.9246 | 0.002224 | 100 -       | 673542 | 26380  | 6671421 | 0.9287 | 0.00212  | 100 -      | 338581 | 12518  | 3242509 |
| Etal | Hcyd        | Hhsa        | Htim        | 0.9232 | 0.002396 | 100 -       | 673542 | 26907  | 6671421 | 0.9272 | 0.002046 | 100 -      | 338581 | 12791  | 3242509 |
| Etal | Hhsa        | Htim        | Hmel        | 0.013  | 0.006292 | 2.061 best  | 28568  | 29321  | 6671421 | 0.0137 | 0.005735 | 2.395 best | 13783  | 14167  | 3242509 |
| Etal | Htim        | Hhsa        | Hmel        | 0.9156 | 0.001764 | 100 -       | 665520 | 29321  | 6671421 | 0.9184 | 0.001627 | 100 -      | 332882 | 14167  | 3242509 |
| Etal | Hmel        | Hhsa        | Htim        | 0.9177 | 0.001918 | 100 -       | 665520 | 28568  | 6671421 | 0.9205 | 0.001614 | 100 -      | 332882 | 13783  | 3242509 |
| Etal | Hhsa        | Hcyd        | Hmel        | 0.0222 | 0.004743 | 4.674 best  | 28212  | 29492  | 6671421 | 0.0237 | 0.00669  | 3.546 best | 13515  | 14172  | 3242509 |
| Etal | Hcyd        | Hhsa        | Hmel        | 0.9149 | 0.001629 | 100 -       | 663103 | 29492  | 6671421 | 0.918  | 0.001553 | 100 -      | 331381 | 14172  | 3242509 |
| Etal | Hmel        | Hhsa        | Hcyd        | 0.9184 | 0.001678 | 100 -       | 663103 | 28212  | 6671421 | 0.9216 | 0.001611 | 100 -      | 331381 | 13515  | 3242509 |
| Etal | Hera        | Hhim        | HeraHhimHyl | 0.5877 | 0.03529  | 16.652 -    | 70548  | 18373  | 6671421 | 0.5977 | 0.023922 | 24.986 -   | 33947  | 8567   | 3242509 |
| Etal | Hhim        | Hera        | HeraHhimHyl | 0.6854 | 0.017384 | 39.425 -    | 98507  | 18373  | 6671421 | 0.697  | 0.013045 | 53.428 -   | 47976  | 8567   | 3242509 |
| Etal | HeraHhimHyl | Hera        | Hhim        | 0.165  | 0.030225 | 5.46 best   | 98507  | 70548  | 6671421 | 0.171  | 0.027196 | 6.289 best | 47976  | 33947  | 3242509 |
| Etal | Hera        | Hhim        | Hsar        | 0.7642 | 0.003753 | 100 -       | 36354  | 271946 | 6671421 | 0.7614 | 0.003263 | 100 -      | 17583  | 129783 | 3242509 |
| Etal | Hhim        | Hera        | Hsar        | 0.762  | 0.003789 | 100 -       | 36735  | 271946 | 6671421 | 0.7539 | 0.003025 | 100 -      | 18210  | 129783 | 3242509 |
| Etal | Hsar        | Hera        | Hhim        | 0.0052 | 0.004579 | 1.139 best  | 36735  | 36354  | 6671421 | 0.0175 | 0.005722 | 3.059 best | 18210  | 17583  | 3242509 |
| Etal | Hera        | Hhim        | Hdem        | 0.7561 | 0.003894 | 100 -       | 35454  | 255314 | 6671421 | 0.7531 | 0.003337 | 100 -      | 17121  | 121569 | 3242509 |
| Etal | Hhim        | Hera        | Hdem        | 0.7531 | 0.003978 | 100 -       | 35957  | 255314 | 6671421 | 0.7442 | 0.003338 | 100 -      | 17829  | 121569 | 3242509 |
| Etal | Hdem        | Hera        | Hhim        | 0.007  | 0.003977 | 1.771 best  | 35957  | 35454  | 6671421 | 0.0202 | 0.00508  | 3.986 best | 17829  | 17121  | 3242509 |
| Etal | Hera        | Hhim        | Ldor        | 0.8937 | 0.001268 | 100 -       | 34397  | 612664 | 6671421 | 0.903  | 0.001166 | 100 -      | 16066  | 315295 | 3242509 |
| Etal | Hhim        | Hera        | Ldor        | 0.8933 | 0.001142 | 100 -       | 34516  | 612664 | 6671421 | 0.9009 | 0.001075 | 100 -      | 16438  | 315295 | 3242509 |
| Etal | Ldor        | Hera        | Hhim        | 0.0017 | 0.003952 | 0.436 best  | 34516  | 34397  | 6671421 | 0.0114 | 0.006142 | 1.858 best | 16438  | 16066  | 3242509 |
| Etal | Hera        | Hhim        | Hbes        | 0.8937 | 0.001223 | 100 -       | 33741  | 601061 | 6671421 | 0.8971 | 0.001094 | 100 -      | 16246  | 299605 | 3242509 |
| Etal | Hhim        | Hera        | Hbes        | 0.8921 | 0.001134 | 100 -       | 34286  | 601061 | 6671421 | 0.8941 | 0.001195 | 100 -      | 16751  | 299605 | 3242509 |
| Etal | Hbes        | Hera        | Hhim        | 0.008  | 0.003311 | 2.418 best  | 34286  | 33741  | 6671421 | 0.0153 | 0.004681 | 3.266 best | 16751  | 16246  | 3242509 |
| Etal | Hera        | Hhim        | Hpar        | 0.8935 | 0.00132  | 100 -       | 33643  | 598272 | 6671421 | 0.8977 | 0.001129 | 100 -      | 16051  | 297801 | 3242509 |
| Etal | Hhim        | Hera        | Hpar        | 0.8923 | 0.001222 | 100 -       | 34061  | 598272 | 6671421 | 0.8941 | 0.00117  | 100 -      | 16650  | 297801 | 3242509 |
| Etal | Hpar        | Hera        | Hhim        | 0.0062 | 0.004023 | 1.534 best  | 34061  | 33643  | 6671421 | 0.0183 | 0.005229 | 3.5 best   | 16650  | 16051  | 3242509 |
| Etal | Hera        | Hhim        | Hnum        | 0.8932 | 0.001259 | 100 -       | 33613  | 596067 | 6671421 | 0.8972 | 0.001058 | 100 -      | 16091  | 297013 | 3242509 |
| Etal | Hhim        | Hera        | Hnum        | 0.8926 | 0.001193 | 100 -       | 33814  | 596067 | 6671421 | 0.8944 | 0.001189 | 100 -      | 16554  | 297013 | 3242509 |
| Etal | Hnum        | Hera        | Hhim        | 0.003  | 0.003533 | 0.842 best  | 33814  | 33613  | 6671421 | 0.0142 | 0.005178 | 2.737 best | 16554  | 16091  | 3242509 |
| Etal | Hera        | Hhim        | Htim        | 0.894  | 0.001187 | 100 -       | 33404  | 596906 | 6671421 | 0.898  | 0.001091 | 100 -      | 15983  | 297521 | 3242509 |
| Etal | Hhim        | Hera        | Htim        | 0.8927 | 0.001223 | 100 -       | 33845  | 596906 | 6671421 | 0.8943 | 0.001215 | 100 -      | 16594  | 297521 | 3242509 |
| Etal | Htim        | Hera        | Hhim        | 0.0066 | 0.004138 | 1.586 best  | 33845  | 33404  | 6671421 | 0.0187 | 0.005137 | 3.649 best | 16594  | 15983  | 3242509 |
| Etal | Hera        | Hhim        | Hcyd        | 0.8937 | 0.001277 | 100 -       | 33454  | 596265 | 6671421 | 0.8979 | 0.001005 | 100 -      | 15982  | 297152 | 3242509 |
| Etal | Hhim        | Hera        | Hcyd        | 0.8929 | 0.001225 | 100 -       | 33721  | 596265 | 6671421 | 0.8945 | 0.001222 | 100 -      | 16548  | 297152 | 3242509 |
| Etal | Hcyd        | Hera        | Hhim        | 0.004  | 0.004    | 0.993 best  | 33721  | 33454  | 6671421 | 0.0174 | 0.005229 | 3.327 best | 16548  | 15982  | 3242509 |
| Etal | Hera        | Hhim        | Hmel        | 0.8938 | 0.001257 | 100 -       | 33508  | 597482 | 6671421 | 0.8982 | 0.001042 | 100 -      | 15969  | 297736 | 3242509 |
| Etal | Hhim        | Hera        | Hmel        | 0.8929 | 0.001206 | 100 -       | 33810  | 597482 | 6671421 | 0.8947 | 0.001206 | 100 -      | 16542  | 297736 | 3242509 |
| Etal | Hmel        | Hera        | Hhim        | 0.0045 | 0.00395  | 1.135 best  | 33810  | 33508  | 6671421 | 0.0176 | 0.004945 | 3.563 best | 16542  | 15969  | 3242509 |
| Etal | Hera        | HeraHhimHyl | Hsar        | 0.8439 | 0.006103 | 100 -       | 26618  | 314385 | 6671421 | 0.842  | 0.004441 | 100 -      | 12911  | 150491 | 3242509 |
| Etal | HeraHhimHyl | Hera        | Hsar        | 0.8414 | 0.005798 | 100 -       | 27085  | 314385 | 6671421 | 0.8363 | 0.004457 | 100 -      | 13416  | 150491 | 3242509 |
| Etal | Hsar        | Hera        | HeraHhimHyl | 0.0087 | 0.004648 | 1.865 best  | 27085  | 26618  | 6671421 | 0.0192 | 0.006373 | 3.009 best | 13416  | 12911  | 3242509 |
| Etal | Hera        | HeraHhimHyl | Hdem        | 0.8398 | 0.006273 | 100 -       | 25965  | 298000 | 6671421 | 0.8379 | 0.004644 | 100 -      | 12561  | 142389 | 3242509 |
| Etal | HeraHhimHyl | Hera        | Hdem        | 0.8367 | 0.005864 | 100 -       | 26500  | 298000 | 6671421 | 0.8318 | 0.004528 | 100 -      | 13080  | 142389 | 3242509 |
| Etal | Hdem        | Hera        | HeraHhimHyl | 0.0102 | 0.004651 | 2.183 best  | 26500  | 25965  | 6671421 | 0.0202 | 0.006365 | 3.177 best | 13080  | 12561  | 3242509 |
| Etal | Hera        | HeraHhimHyl | Ldor        | 0.9262 | 0.002539 | 100 -       | 25129  | 655571 | 6671421 | 0.933  | 0.001589 | 100 -      | 11652  | 336261 | 3242509 |
| Etal | HeraHhimHyl | Hera        | Ldor        | 0.9253 | 0.002335 | 100 -       | 25439  | 655571 | 6671421 | 0.9305 | 0.001627 | 100 -      | 12103  | 336261 | 3242509 |
| Etal | Ldor        | Hera        | HeraHhimHyl | 0.0061 | 0.004581 | 1.333 best  | 25439  | 25129  | 6671421 | 0.019  | 0.007316 | 2.594 best | 12103  | 11652  | 3242509 |
| Etal | Hera        | HeraHhimHyl | Hbes        | 0.9261 | 0.002457 | 100 -       | 24734  | 644229 | 6671421 | 0.9283 | 0.001728 | 100 -      | 11927  | 320666 | 324250  |

|      |      |      |      |        |          |             |        |        |         |        |          |             |        |        |         |
|------|------|------|------|--------|----------|-------------|--------|--------|---------|--------|----------|-------------|--------|--------|---------|
| Etal | Hsar | Hera | Hbes | 0.7016 | 0.002661 | 100 -       | 73304  | 418035 | 6671421 | 0.708  | 0.002737 | 100 -       | 36383  | 212828 | 3242509 |
| Etal | Hbes | Hera | Hsar | 0.0815 | 0.003047 | 26.739 best | 73304  | 86307  | 6671421 | 0.0677 | 0.003626 | 18.679 best | 36383  | 41669  | 3242509 |
| Etal | Hera | Hsar | Hpar | 0.6562 | 0.00311  | 100 -       | 86218  | 415255 | 6671421 | 0.6719 | 0.002832 | 100 -       | 41390  | 210940 | 3242509 |
| Etal | Hsar | Hera | Hpar | 0.7025 | 0.002885 | 100 -       | 72573  | 415255 | 6671421 | 0.7073 | 0.002855 | 100 -       | 36170  | 210940 | 3242509 |
| Etal | Hpar | Hera | Hsar | 0.0859 | 0.002627 | 32.706 best | 72573  | 86218  | 6671421 | 0.0673 | 0.003392 | 19.845 best | 36170  | 41390  | 3242509 |
| Etal | Hera | Hsar | Hnum | 0.6548 | 0.003133 | 100 -       | 86168  | 413030 | 6671421 | 0.6712 | 0.002776 | 100 -       | 41326  | 210048 | 3242509 |
| Etal | Hsar | Hera | Hnum | 0.703  | 0.002976 | 100 -       | 72042  | 413030 | 6671421 | 0.7075 | 0.002909 | 100 -       | 35982  | 210048 | 3242509 |
| Etal | Hnum | Hera | Hsar | 0.0893 | 0.002674 | 33.392 best | 72042  | 86168  | 6671421 | 0.0691 | 0.00352  | 19.64 best  | 35982  | 41326  | 3242509 |
| Etal | Hera | Hsar | Htim | 0.657  | 0.003209 | 100 -       | 85597  | 413507 | 6671421 | 0.6728 | 0.002873 | 100 -       | 41183  | 210521 | 3242509 |
| Etal | Hsar | Hera | Htim | 0.7022 | 0.002803 | 100 -       | 72348  | 413507 | 6671421 | 0.7082 | 0.002922 | 100 -       | 35959  | 210521 | 3242509 |
| Etal | Htim | Hera | Hsar | 0.0839 | 0.003076 | 27.27 best  | 72348  | 85597  | 6671421 | 0.0677 | 0.003593 | 18.846 best | 35959  | 41183  | 3242509 |
| Etal | Hera | Hsar | Hcyd | 0.6568 | 0.003154 | 100 -       | 85501  | 412720 | 6671421 | 0.6726 | 0.00208  | 100 -       | 41119  | 210089 | 3242509 |
| Etal | Hsar | Hera | Hcyd | 0.7027 | 0.002721 | 100 -       | 72081  | 412720 | 6671421 | 0.709  | 0.002905 | 100 -       | 35777  | 210089 | 3242509 |
| Etal | Hcyd | Hera | Hsar | 0.0852 | 0.002693 | 31.62 best  | 72081  | 85501  | 6671421 | 0.0695 | 0.003559 | 19.52 best  | 35777  | 41119  | 3242509 |
| Etal | Hera | Hsar | Hmel | 0.657  | 0.003201 | 100 -       | 85709  | 414091 | 6671421 | 0.6735 | 0.002937 | 100 -       | 41101  | 210668 | 3242509 |
| Etal | Hsar | Hera | Hmel | 0.7023 | 0.002803 | 100 -       | 72426  | 414091 | 6671421 | 0.7089 | 0.002941 | 100 -       | 35892  | 210668 | 3242509 |
| Etal | Hmel | Hera | Hsar | 0.084  | 0.00301  | 27.908 best | 72426  | 85709  | 6671421 | 0.0677 | 0.003654 | 18.518 best | 35892  | 41101  | 3242509 |
| Etal | Hera | Hdem | Ldor | 0.7142 | 0.002578 | 100 -       | 71701  | 430108 | 6671421 | 0.7426 | 0.002073 | 100 -       | 33764  | 228545 | 3242509 |
| Etal | Hdem | Hera | Ldor | 0.7199 | 0.00244  | 100 -       | 70049  | 430108 | 6671421 | 0.7429 | 0.002302 | 100 -       | 33717  | 228545 | 3242509 |
| Etal | Ldor | Hera | Hdem | 0.0117 | 0.003028 | 3.849 best  | 70049  | 71701  | 6671421 | 0.0007 | 0.003793 | 0.184 best  | 33717  | 33764  | 3242509 |
| Etal | Hera | Hdem | Hbes | 0.708  | 0.00264  | 100 -       | 71662  | 419122 | 6671421 | 0.7214 | 0.002302 | 100 -       | 34551  | 213462 | 3242509 |
| Etal | Hdem | Hera | Hbes | 0.7195 | 0.0024   | 100 -       | 68364  | 419122 | 6671421 | 0.7251 | 0.002581 | 100 -       | 34020  | 213462 | 3242509 |
| Etal | Hbes | Hera | Hdem | 0.0236 | 0.00259  | 9.097 best  | 68364  | 71662  | 6671421 | 0.0077 | 0.004354 | 1.778 best  | 34020  | 34551  | 3242509 |
| Etal | Hera | Hdem | Hpar | 0.7061 | 0.002603 | 100 -       | 71741  | 416510 | 6671421 | 0.7208 | 0.002322 | 100 -       | 34338  | 211640 | 3242509 |
| Etal | Hdem | Hera | Hpar | 0.7197 | 0.002511 | 100 -       | 67880  | 416510 | 6671421 | 0.726  | 0.002644 | 100 -       | 33594  | 211640 | 3242509 |
| Etal | Hpar | Hera | Hdem | 0.0277 | 0.002726 | 10.148 best | 67880  | 71741  | 6671421 | 0.011  | 0.004279 | 2.559 best  | 33594  | 34338  | 3242509 |
| Etal | Hera | Hdem | Hnum | 0.705  | 0.00261  | 100 -       | 71694  | 414288 | 6671421 | 0.7205 | 0.002323 | 100 -       | 34237  | 210711 | 3242509 |
| Etal | Hdem | Hera | Hnum | 0.7199 | 0.002698 | 100 -       | 67462  | 414288 | 6671421 | 0.7259 | 0.002648 | 100 -       | 33461  | 210711 | 3242509 |
| Etal | Hnum | Hera | Hdem | 0.0304 | 0.002602 | 11.688 best | 67462  | 71694  | 6671421 | 0.0115 | 0.004399 | 2.606 best  | 33461  | 34237  | 3242509 |
| Etal | Hera | Hdem | Htim | 0.7075 | 0.002682 | 100 -       | 71050  | 414692 | 6671421 | 0.7225 | 0.002489 | 100 -       | 34007  | 211097 | 3242509 |
| Etal | Hdem | Hera | Htim | 0.7196 | 0.00259  | 100 -       | 67629  | 414692 | 6671421 | 0.7257 | 0.002676 | 100 -       | 33556  | 211097 | 3242509 |
| Etal | Htim | Hera | Hdem | 0.0247 | 0.002636 | 9.362 best  | 67629  | 71050  | 6671421 | 0.0067 | 0.004415 | 1.512 best  | 33556  | 34007  | 3242509 |
| Etal | Hera | Hdem | Hcyd | 0.7075 | 0.002683 | 100 -       | 70908  | 413859 | 6671421 | 0.7226 | 0.00241  | 100 -       | 33929  | 210651 | 3242509 |
| Etal | Hdem | Hera | Hcyd | 0.7196 | 0.002646 | 100 -       | 67491  | 413859 | 6671421 | 0.7259 | 0.002771 | 100 -       | 33455  | 210651 | 3242509 |
| Etal | Hcyd | Hera | Hdem | 0.0247 | 0.002576 | 9.586 best  | 67491  | 70908  | 6671421 | 0.007  | 0.004254 | 1.653 best  | 33455  | 33929  | 3242509 |
| Etal | Hera | Hdem | Hmel | 0.7072 | 0.00272  | 100 -       | 71240  | 415354 | 6671421 | 0.7229 | 0.002473 | 100 -       | 33987  | 211306 | 3242509 |
| Etal | Hdem | Hera | Hmel | 0.72   | 0.002666 | 100 -       | 67622  | 415354 | 6671421 | 0.7265 | 0.00273  | 100 -       | 33482  | 211306 | 3242509 |
| Etal | Hmel | Hera | Hdem | 0.0261 | 0.002496 | 10.441 best | 67622  | 71240  | 6671421 | 0.0075 | 0.00411  | 1.82 best   | 33482  | 33987  | 3242509 |
| Etal | Hera | Ldor | Hbes | 0.0431 | 0.003848 | 11.199 best | 132495 | 121548 | 6671421 | 0.1165 | 0.003849 | 30.261 best | 76054  | 60184  | 3242509 |
| Etal | Ldor | Hera | Hbes | 0.3927 | 0.004443 | 88.389 -    | 278726 | 121548 | 6671421 | 0.3898 | 0.00387  | 100 -       | 137084 | 60184  | 3242509 |
| Etal | Hbes | Hera | Ldor | 0.3556 | 0.003953 | 89.96 -     | 278726 | 132495 | 6671421 | 0.2863 | 0.003406 | 84.064 -    | 137084 | 76054  | 3242509 |
| Etal | Hera | Ldor | Hpar | 0.0544 | 0.003958 | 13.734 best | 132290 | 118652 | 6671421 | 0.1304 | 0.00362  | 36.021 best | 75762  | 58283  | 3242509 |
| Etal | Ldor | Hera | Hpar | 0.4012 | 0.004325 | 92.754 -    | 277637 | 118652 | 6671421 | 0.4015 | 0.003666 | 100 -       | 136476 | 58283  | 3242509 |
| Etal | Hpar | Hera | Ldor | 0.3546 | 0.003689 | 96.124 -    | 277637 | 132290 | 6671421 | 0.2861 | 0.003405 | 84.016 -    | 136476 | 75762  | 3242509 |
| Etal | Hera | Ldor | Hnum | 0.0638 | 0.003821 | 16.704 best | 131808 | 115995 | 6671421 | 0.1381 | 0.004261 | 32.417 best | 75416  | 57109  | 3242509 |
| Etal | Ldor | Hera | Hnum | 0.4099 | 0.004335 | 94.566 -    | 277157 | 115995 | 6671421 | 0.4096 | 0.00404  | 100 -       | 136353 | 57109  | 3242509 |
| Etal | Hnum | Hera | Ldor | 0.3554 | 0.003947 | 90.05 -     | 277157 | 131808 | 6671421 | 0.2878 | 0.003456 | 83.271 -    | 136353 | 75416  | 3242509 |
| Etal | Hera | Ldor | Htim | 0.0597 | 0.003904 | 15.296 best | 131032 | 116267 | 6671421 | 0.1335 | 0.003868 | 34.519 best | 75095  | 57404  | 3242509 |
| Etal | Ldor | Hera | Htim | 0.409  | 0.004093 | 99.932 -    | 277176 | 116267 | 6671421 | 0.4073 | 0.00395  | 100 -       | 136293 | 57404  | 3242509 |
| Etal | Htim | Hera | Ldor | 0.358  | 0.003689 | 97.056 -    | 277176 | 131032 | 6671421 | 0.2895 | 0.003603 | 80.345 -    | 136293 | 75095  | 3242509 |
| Etal | Hera | Ldor | Hcyd | 0.0628 | 0.003927 | 15.996 best | 130776 | 115320 | 6671421 | 0.1368 | 0.003698 | 36.988 best | 75054  | 56995  | 3242509 |
| Etal | Ldor | Hera | Hcyd | 0.4125 | 0.004139 | 99.661 -    | 277227 | 115320 | 6671421 | 0.4102 | 0.003837 | 100 -       | 136270 | 56995  | 3242509 |
| Etal | Hcyd | Hera | Ldor | 0.359  | 0.003708 | 96.908 -    | 277227 | 130776 | 6671421 | 0.2897 | 0.003508 | 82.583 -    | 136270 | 75054  | 3242509 |
| Etal | Hera | Ldor | Hmel | 0.0577 | 0.004132 | 13.956 best | 131072 | 116779 | 6671421 | 0.132  | 0.004109 | 32.113 best | 74892  | 57430  | 3242509 |
| Etal | Ldor | Hera | Hmel | 0.4072 | 0.004424 | 92.034 -    | 277171 | 116779 | 6671421 | 0.4069 | 0.003974 | 100 -       | 136213 | 57430  | 3242509 |
| Etal | Hmel | Hera | Ldor | 0.3579 | 0.003704 | 96.616 -    | 277171 | 131072 | 6671421 | 0.2905 | 0.00354  | 82.064 -    | 136213 | 74892  | 3242509 |
| Etal | Hera | Hbes | Hpar | 0.0281 | 0.003411 | 8.252 best  | 49145  | 46454  | 6671421 | 0.0346 | 0.00459  | 7.534 best  | 24064  | 22455  | 3242509 |
| Etal | Hbes | Hera | Hpar | 0.8551 | 0.001526 | 100 -       | 594762 | 46454  | 6671421 | 0.8608 | 0.002028 | 100 -       | 300158 | 22455  | 3242509 |
| Etal | Hpar | Hera | Hbes | 0.8474 | 0.001626 | 100 -       | 594762 | 49145  | 6671421 | 0.8516 | 0.002021 | 100 -       | 300158 | 24064  | 3242509 |
| Etal | Hera | Hbes | Hnum | 0.055  | 0.003628 | 15.161 best | 46670  | 41804  | 6671421 | 0.0563 | 0.004993 | 11.276 best | 22861  | 20424  | 3242509 |
| Etal | Hbes | Hera | Hnum | 0.8707 | 0.001887 | 100 -       | 604556 | 41804  | 6671421 | 0.8745 | 0.002193 | 100 -       | 305129 | 20424  | 3242509 |
| Etal | Hnum | Hera | Hbes | 0.8567 | 0.002114 | 100 -       | 604556 | 46670  | 6671421 | 0.8606 | 0.002274 | 100 -       | 305129 | 22861  | 3242509 |
| Etal | Hera | Hbes | Htim | 0.0384 | 0.004018 | 9.559 best  | 51616  | 47798  | 6671421 | 0.0375 | 0.005008 | 7.496 best  | 25162  | 23341  | 3242509 |
| Etal | Hbes | Hera | Htim | 0.8464 | 0.001466 | 100 -       | 574620 | 47798  | 6671421 | 0.8512 | 0.002003 | 100 -       | 290443 | 23341  | 3242509 |
| Etal | Htim | Hera | Hbes | 0.8352 | 0.001949 | 100 -       | 574620 | 51616  | 6671421 | 0.8406 | 0.002094 | 100 -       | 290443 | 25162  | 3242509 |
| Etal | Hera | Hbes | Hcyd | 0.0454 | 0.003424 | 13.249 best | 51958  | 47449  | 6671421 | 0.0451 | 0.004278 | 10.549 best | 25347  | 23158  | 3242509 |
| Etal | Hbes | Hera | Hcyd | 0.8469 | 0.001579 | 100 -       | 572200 | 47449  | 6671421 | 0.8517 | 0.00201  | 100 -       | 289125 | 23158  | 3242509 |
| Etal | Hcyd | Hera | Hbes | 0.8335 | 0.001863 | 100 -       | 572200 | 51958  | 6671421 | 0.8388 | 0.002099 | 100 -       | 289125 | 25347  | 3242509 |
| Etal | Hera | Hbes | Hmel | 0.0334 | 0.004064 | 8.208 best  | 51811  | 48465  | 6671421 | 0.0329 | 0.00524  | 6.277 best  | 24986  | 23394  | 3242509 |
| Etal | Hbes | Hera | Hmel | 0.8446 | 0.001769 | 100 -       | 575053 | 48465  | 6671421 | 0.851  | 0.002119 | 100 -       | 290649 | 23394  | 3242509 |
| Etal | Hmel | Hera | Hbes | 0.8347 | 0.001863 | 100 -       | 575053 | 51811  | 6671421 | 0.8417 | 0.001993 | 100 -       | 290649 | 24986  | 3242509 |
| Etal | Hera | Hpar | Hnum | 0.0271 | 0.002662 | 10.184 best | 41195  | 39020  | 6671421 | 0.0211 | 0.005379 | 3.929 best  | 19992  | 19164  | 3242509 |
| Etal | Hpar | Hera | Hnum | 0.8809 | 0.001718 | 100 -       | 615945 | 39020  | 6671421 | 0.8833 | 0.002097 | 100 -       | 309140 | 19164  | 3242509 |
| Etal | Hnum | Hera | Hpar | 0.8746 | 0.001807 | 100 -       | 615945 | 41195  | 6671421 | 0.8785 | 0.001958 | 100 -       | 309140 | 19992  | 3242509 |
| Etal | Hera | Hpar | Htim | 0.0133 | 0.003667 | 3.631 best  | 42881  | 41754  | 6671421 | 0.0052 | 0.004546 | 1.135 best  | 20617  | 20405  | 3242509 |
| Etal | Hpar | Hera | Htim | 0.8703 | 0.002348 | 100 -       | 602204 |        |         |        |          |             |        |        |         |

|      |             |            |             |        |          |             |        |        |         |        |          |             |        |        |         |
|------|-------------|------------|-------------|--------|----------|-------------|--------|--------|---------|--------|----------|-------------|--------|--------|---------|
| Etal | Hmel        | Hera       | Hcyd        | 0.9175 | 0.001764 | 100 -       | 661388 | 28449  | 6671421 | 0.9207 | 0.001617 | 100 -       | 330815 | 13655  | 3242509 |
| Etal | Hhim        | HeraHhimHy | Hsar        | 0.8794 | 0.002809 | 100 -       | 21625  | 336970 | 6671421 | 0.8782 | 0.003066 | 100 -       | 10475  | 161457 | 3242509 |
| Etal | HeraHhimHyl | Hhim       | Hsar        | 0.8789 | 0.003211 | 100 -       | 21711  | 336970 | 6671421 | 0.8795 | 0.003218 | 100 -       | 10353  | 161457 | 3242509 |
| Etal | Hsar        | Hhim       | HeraHhimHyl | 0.002  | 0.005295 | 0.383 best  | 21711  | 21625  | 6671421 | 0.0058 | 0.006035 | 0.967 best  | 10353  | 10475  | 3242509 |
| Etal | Hhim        | HeraHhimHy | Hdem        | 0.876  | 0.002883 | 100 -       | 21190  | 320681 | 6671421 | 0.8744 | 0.003176 | 100 -       | 10281  | 153430 | 3242509 |
| Etal | HeraHhimHyl | Hhim       | Hdem        | 0.8759 | 0.003332 | 100 -       | 21222  | 320681 | 6671421 | 0.8766 | 0.003349 | 100 -       | 10092  | 153430 | 3242509 |
| Etal | Hdem        | Hhim       | HeraHhimHyl | 0.0008 | 0.00449  | 0.178 best  | 21222  | 21190  | 6671421 | 0.0092 | 0.00591  | 1.561 best  | 10092  | 10281  | 3242509 |
| Etal | Hhim        | HeraHhimHy | Ldor        | 0.9418 | 0.001276 | 100 -       | 20351  | 678633 | 6671421 | 0.9472 | 0.001301 | 100 -       | 9438   | 347704 | 3242509 |
| Etal | HeraHhimHyl | Hhim       | Ldor        | 0.9412 | 0.001434 | 100 -       | 20542  | 678633 | 6671421 | 0.9467 | 0.001427 | 100 -       | 9517   | 347704 | 3242509 |
| Etal | Ldor        | Hhim       | HeraHhimHyl | 0.0047 | 0.005559 | 0.843 best  | 20542  | 20351  | 6671421 | 0.0042 | 0.007251 | 0.582 best  | 9517   | 9438   | 3242509 |
| Etal | Hhim        | HeraHhimHy | Hbes        | 0.9412 | 0.00122  | 100 -       | 20222  | 667131 | 6671421 | 0.9435 | 0.001407 | 100 -       | 9655   | 331918 | 3242509 |
| Etal | HeraHhimHyl | Hhim       | Hbes        | 0.9416 | 0.001297 | 100 -       | 20075  | 667131 | 6671421 | 0.9442 | 0.001419 | 100 -       | 9525   | 331918 | 3242509 |
| Etal | Hbes        | Hhim       | HeraHhimHyl | 0.0036 | 0.003946 | 0.924 best  | 20075  | 20222  | 6671421 | 0.0067 | 0.006572 | 1.027 best  | 9525   | 9655   | 3242509 |
| Etal | Hhim        | HeraHhimHy | Hpar        | 0.9413 | 0.001194 | 100 -       | 20083  | 664428 | 6671421 | 0.9434 | 0.001393 | 100 -       | 9615   | 330175 | 3242509 |
| Etal | HeraHhimHyl | Hhim       | Hpar        | 0.9417 | 0.001354 | 100 -       | 19967  | 664428 | 6671421 | 0.9444 | 0.001414 | 100 -       | 9445   | 330175 | 3242509 |
| Etal | Hpar        | Hhim       | HeraHhimHyl | 0.0029 | 0.005068 | 0.569 best  | 19967  | 20083  | 6671421 | 0.0089 | 0.006824 | 1.302 best  | 9445   | 9615   | 3242509 |
| Etal | Hhim        | HeraHhimHy | Hnum        | 0.9415 | 0.001237 | 100 -       | 19944  | 662331 | 6671421 | 0.9436 | 0.001422 | 100 -       | 9562   | 329430 | 3242509 |
| Etal | HeraHhimHyl | Hhim       | Hnum        | 0.9415 | 0.001316 | 100 -       | 19947  | 662331 | 6671421 | 0.9445 | 0.001381 | 100 -       | 9404   | 329430 | 3242509 |
| Etal | Hnum        | Hhim       | HeraHhimHyl | 0.0001 | 0.004185 | 0.02 best   | 19947  | 19944  | 6671421 | 0.0083 | 0.007232 | 1.151 best  | 9404   | 9562   | 3242509 |
| Etal | Hhim        | HeraHhimHy | Htim        | 0.9416 | 0.001231 | 100 -       | 19937  | 663132 | 6671421 | 0.9438 | 0.001334 | 100 -       | 9537   | 329873 | 3242509 |
| Etal | HeraHhimHyl | Hhim       | Htim        | 0.9418 | 0.001288 | 100 -       | 19884  | 663132 | 6671421 | 0.9444 | 0.001382 | 100 -       | 9438   | 329873 | 3242509 |
| Etal | Htim        | Hhim       | HeraHhimHyl | 0.0013 | 0.004232 | 0.313 best  | 19884  | 19937  | 6671421 | 0.0052 | 0.006819 | 0.76 best   | 9438   | 9537   | 3242509 |
| Etal | Hhim        | HeraHhimHy | Hcyd        | 0.9417 | 0.001215 | 100 -       | 19906  | 662584 | 6671421 | 0.9437 | 0.001366 | 100 -       | 9546   | 329559 | 3242509 |
| Etal | HeraHhimHyl | Hhim       | Hcyd        | 0.9419 | 0.001331 | 100 -       | 19831  | 662584 | 6671421 | 0.9446 | 0.001417 | 100 -       | 9387   | 329559 | 3242509 |
| Etal | Hcyd        | Hhim       | HeraHhimHyl | 0.0019 | 0.004419 | 0.425 best  | 19831  | 19906  | 6671421 | 0.0084 | 0.006528 | 1.28 best   | 9387   | 9546   | 3242509 |
| Etal | Hhim        | HeraHhimHy | Hmel        | 0.9418 | 0.001176 | 100 -       | 19903  | 663709 | 6671421 | 0.9439 | 0.001386 | 100 -       | 9521   | 330124 | 3242509 |
| Etal | HeraHhimHyl | Hhim       | Hmel        | 0.9418 | 0.001327 | 100 -       | 19877  | 663709 | 6671421 | 0.9447 | 0.001394 | 100 -       | 9389   | 330124 | 3242509 |
| Etal | Hmel        | Hhim       | HeraHhimHyl | 0.0006 | 0.004062 | 0.157 best  | 19877  | 19903  | 6671421 | 0.0069 | 0.006766 | 1.026 best  | 9389   | 9521   | 3242509 |
| Etal | Hhim        | Hsar       | Hdem        | 0.1304 | 0.003599 | 36.237 best | 68700  | 52846  | 6671421 | 0.1338 | 0.004432 | 30.182 best | 33192  | 25359  | 3242509 |
| Etal | Hsar        | Hhim       | Hdem        | 0.517  | 0.00368  | 100 -       | 165996 | 52846  | 6671421 | 0.5312 | 0.003136 | 100 -       | 82833  | 25359  | 3242509 |
| Etal | Hdem        | Hhim       | Hsar        | 0.4146 | 0.004075 | 100 -       | 165996 | 68700  | 6671421 | 0.4279 | 0.003611 | 100 -       | 82833  | 33192  | 3242509 |
| Etal | Hhim        | Hsar       | Ldor        | 0.6666 | 0.003238 | 100 -       | 85774  | 428711 | 6671421 | 0.6978 | 0.002856 | 100 -       | 40552  | 227836 | 3242509 |
| Etal | Hsar        | Hhim       | Ldor        | 0.7015 | 0.0025   | 100 -       | 75229  | 428711 | 6671421 | 0.7295 | 0.002245 | 100 -       | 35631  | 227836 | 3242509 |
| Etal | Ldor        | Hhim       | Hsar        | 0.0655 | 0.002934 | 22.318 best | 75229  | 85774  | 6671421 | 0.0646 | 0.003331 | 19.391 best | 35631  | 40552  | 3242509 |
| Etal | Hhim        | Hsar       | Hbes        | 0.6571 | 0.003078 | 100 -       | 86513  | 418077 | 6671421 | 0.6729 | 0.002816 | 100 -       | 41630  | 212911 | 3242509 |
| Etal | Hsar        | Hhim       | Hbes        | 0.7028 | 0.002727 | 100 -       | 72965  | 418077 | 6671421 | 0.7119 | 0.002575 | 100 -       | 35839  | 212911 | 3242509 |
| Etal | Hbes        | Hhim       | Hsar        | 0.085  | 0.002849 | 29.814 best | 72965  | 86513  | 6671421 | 0.0748 | 0.003421 | 21.853 best | 35839  | 41630  | 3242509 |
| Etal | Hhim        | Hsar       | Hpar        | 0.6557 | 0.003035 | 100 -       | 86388  | 415388 | 6671421 | 0.6715 | 0.002815 | 100 -       | 41475  | 211053 | 3242509 |
| Etal | Hsar        | Hhim       | Hpar        | 0.7034 | 0.002979 | 100 -       | 72325  | 415388 | 6671421 | 0.711  | 0.002727 | 100 -       | 35656  | 211053 | 3242509 |
| Etal | Hpar        | Hhim       | Hsar        | 0.0886 | 0.00278  | 31.872 best | 72325  | 86388  | 6671421 | 0.0754 | 0.003397 | 22.207 best | 35656  | 41475  | 3242509 |
| Etal | Hhim        | Hsar       | Hnum        | 0.6551 | 0.003102 | 100 -       | 86105  | 413147 | 6671421 | 0.672  | 0.002825 | 100 -       | 41227  | 210113 | 3242509 |
| Etal | Hsar        | Hhim       | Hnum        | 0.704  | 0.002992 | 100 -       | 71778  | 413147 | 6671421 | 0.7115 | 0.002698 | 100 -       | 35420  | 210113 | 3242509 |
| Etal | Hnum        | Hhim       | Hsar        | 0.0907 | 0.002529 | 35.874 best | 71778  | 86105  | 6671421 | 0.0758 | 0.003279 | 23.106 best | 35420  | 41227  | 3242509 |
| Etal | Hhim        | Hsar       | Htim        | 0.6567 | 0.003131 | 100 -       | 85699  | 413549 | 6671421 | 0.6725 | 0.002864 | 100 -       | 41239  | 210593 | 3242509 |
| Etal | Hsar        | Hhim       | Htim        | 0.7034 | 0.002895 | 100 -       | 72009  | 413549 | 6671421 | 0.7122 | 0.00274  | 100 -       | 35404  | 210593 | 3242509 |
| Etal | Htim        | Hhim       | Hsar        | 0.0868 | 0.00311  | 27.915 best | 72009  | 85699  | 6671421 | 0.0761 | 0.003444 | 22.104 best | 35404  | 41239  | 3242509 |
| Etal | Hhim        | Hsar       | Hcyd        | 0.6569 | 0.00308  | 100 -       | 85493  | 412826 | 6671421 | 0.6725 | 0.002845 | 100 -       | 41158  | 210189 | 3242509 |
| Etal | Hsar        | Hhim       | Hcyd        | 0.7037 | 0.002822 | 100 -       | 71806  | 412826 | 6671421 | 0.7128 | 0.002731 | 100 -       | 35250  | 210189 | 3242509 |
| Etal | Hcyd        | Hhim       | Hsar        | 0.087  | 0.002503 | 34.763 best | 71806  | 85493  | 6671421 | 0.0773 | 0.003432 | 22.529 best | 35250  | 41158  | 3242509 |
| Etal | Hhim        | Hsar       | Hmel        | 0.6571 | 0.003098 | 100 -       | 85711  | 414172 | 6671421 | 0.6735 | 0.002933 | 100 -       | 41109  | 210730 | 3242509 |
| Etal | Hsar        | Hhim       | Hmel        | 0.7034 | 0.002889 | 100 -       | 72126  | 414172 | 6671421 | 0.7129 | 0.002732 | 100 -       | 35327  | 210730 | 3242509 |
| Etal | Hmel        | Hhim       | Hsar        | 0.0861 | 0.002971 | 28.973 best | 72126  | 85711  | 6671421 | 0.0756 | 0.003513 | 21.536 best | 35327  | 41109  | 3242509 |
| Etal | Hhim        | Hdem       | Ldor        | 0.7156 | 0.002516 | 100 -       | 71318  | 430109 | 6671421 | 0.7443 | 0.002266 | 100 -       | 33511  | 228628 | 3242509 |
| Etal | Hdem        | Hhim       | Ldor        | 0.7216 | 0.00251  | 100 -       | 69547  | 430109 | 6671421 | 0.7471 | 0.002186 | 100 -       | 33092  | 228628 | 3242509 |
| Etal | Ldor        | Hhim       | Hdem        | 0.0126 | 0.002893 | 4.345 best  | 69547  | 71318  | 6671421 | 0.0063 | 0.003885 | 1.618 best  | 33092  | 33511  | 3242509 |
| Etal | Hhim        | Hdem       | Hbes        | 0.7072 | 0.002402 | 100 -       | 71936  | 419354 | 6671421 | 0.7221 | 0.002322 | 100 -       | 34473  | 213587 | 3242509 |
| Etal | Hdem        | Hhim       | Hbes        | 0.7206 | 0.002403 | 100 -       | 68093  | 419354 | 6671421 | 0.7293 | 0.002328 | 100 -       | 33437  | 213587 | 3242509 |
| Etal | Hbes        | Hhim       | Hdem        | 0.0274 | 0.002366 | 11.603 best | 68093  | 71936  | 6671421 | 0.0153 | 0.004015 | 3.799 best  | 33437  | 34473  | 3242509 |
| Etal | Hhim        | Hdem       | Hpar        | 0.7058 | 0.002423 | 100 -       | 71895  | 416749 | 6671421 | 0.7208 | 0.002314 | 100 -       | 34363  | 211774 | 3242509 |
| Etal | Hdem        | Hhim       | Hpar        | 0.7208 | 0.002533 | 100 -       | 67616  | 416749 | 6671421 | 0.7302 | 0.002365 | 100 -       | 33020  | 211774 | 3242509 |
| Etal | Hpar        | Hhim       | Hdem        | 0.0307 | 0.00229  | 13.394 best | 67616  | 71895  | 6671421 | 0.0199 | 0.003699 | 5.388 best  | 33020  | 34363  | 3242509 |
| Etal | Hhim        | Hdem       | Hnum        | 0.7053 | 0.002469 | 100 -       | 71648  | 414544 | 6671421 | 0.7214 | 0.002331 | 100 -       | 34123  | 210842 | 3242509 |
| Etal | Hdem        | Hhim       | Hnum        | 0.721  | 0.002708 | 100 -       | 67215  | 414544 | 6671421 | 0.7302 | 0.002312 | 100 -       | 32884  | 210842 | 3242509 |
| Etal | Hnum        | Hhim       | Hdem        | 0.0319 | 0.002224 | 14.251 best | 67215  | 71648  | 6671421 | 0.0185 | 0.003792 | 4.876 best  | 32884  | 34123  | 3242509 |
| Etal | Hhim        | Hdem       | Htim        | 0.7073 | 0.002534 | 100 -       | 71130  | 414834 | 6671421 | 0.7227 | 0.002458 | 100 -       | 33989  | 211176 | 3242509 |
| Etal | Hdem        | Hhim       | Htim        | 0.721  | 0.002658 | 100 -       | 67268  | 414834 | 6671421 | 0.7302 | 0.002398 | 100 -       | 32927  | 211176 | 3242509 |
| Etal | Htim        | Hhim       | Hdem        | 0.0279 | 0.002741 | 10.183 best | 67268  | 71130  | 6671421 | 0.0159 | 0.004009 | 3.959 best  | 32927  | 33989  | 3242509 |
| Etal | Hhim        | Hdem       | Hcyd        | 0.7076 | 0.002527 | 100 -       | 70896  | 414083 | 6671421 | 0.7229 | 0.002457 | 100 -       | 33903  | 210767 | 3242509 |
| Etal | Hdem        | Hhim       | Hcyd        | 0.7207 | 0.002688 | 100 -       | 67212  | 414083 | 6671421 | 0.7302 | 0.002489 | 100 -       | 32863  | 210767 | 3242509 |
| Etal | Hcyd        | Hhim       | Hdem        | 0.0267 | 0.002698 | 9.89 best   | 67212  | 70896  | 6671421 | 0.0156 | 0.003918 | 3.975 best  | 32863  | 33903  | 3242509 |
| Etal | Hhim        | Hdem       | Hmel        | 0.7073 | 0.002528 | 100 -       | 71249  | 415564 | 6671421 | 0.7233 | 0.002477 | 100 -       | 33943  | 211397 | 3242509 |
| Etal | Hdem        | Hhim       | Hmel        | 0.7212 | 0.002713 | 100 -       | 67329  | 415564 | 6671421 | 0.7309 | 0.002432 | 100 -       | 32865  | 211397 | 3242509 |
| Etal | Hmel        | Hhim       | Hdem        | 0.0283 | 0.00275  | 10.289 best | 67329  | 71249  | 6671421 | 0.0161 | 0.003805 | 4.24 best   | 32865  | 33943  | 3242509 |
| Etal | Hhim        | Ldor       | Hbes        | 0.0448 | 0.003917 | 11.428 best | 132734 | 121361 | 6671421 | 0.1174 | 0.003964 | 29.608 best | 76186  | 60183  | 3242509 |
| Etal | Ldor        | Hhim       | Hbes        | 0.3929 | 0.004735 | 82.967 -    | 278420 | 121361 | 6671421 | 0.3887 | 0.003988 | 97.467 -    | 136711 | 60183  | 3242509 |
| Etal | Hbes        | Hhim       | Ldor        | 0.3543 | 0.003859 | 91.829 -    | 278420 | 132734 | 6671421 | 0.2843 | 0.00358  | 79.406 -    | 13671  |        |         |

|      |                |                |      |        |          |             |        |        |         |        |          |             |        |        |         |
|------|----------------|----------------|------|--------|----------|-------------|--------|--------|---------|--------|----------|-------------|--------|--------|---------|
| Etal | Hhim           | Hbes           | Hcyd | 0.0425 | 0.003433 | 12.376 best | 51911  | 47680  | 6671421 | 0.0463 | 0.004406 | 10.507 best | 25423  | 23173  | 3242509 |
| Etal | Hbes           | Hhim           | Hcyd | 0.8461 | 0.00165  | 100 -       | 571886 | 47680  | 6671421 | 0.8514 | 0.00209  | 100 -       | 288635 | 23173  | 3242509 |
| Etal | Hcyd           | Hhim           | Hbes | 0.8336 | 0.00194  | 100 -       | 571886 | 51911  | 6671421 | 0.8381 | 0.002146 | 100 -       | 288635 | 25423  | 3242509 |
| Etal | Hhim           | Hbes           | Hmel | 0.0309 | 0.003469 | 8.903 best  | 51781  | 48678  | 6671421 | 0.0343 | 0.005474 | 6.257 best  | 25049  | 23389  | 3242509 |
| Etal | Hbes           | Hhim           | Hmel | 0.8438 | 0.001805 | 100 -       | 574721 | 48678  | 6671421 | 0.8508 | 0.002243 | 100 -       | 290139 | 23389  | 3242509 |
| Etal | Hmel           | Hhim           | Hbes | 0.8347 | 0.001868 | 100 -       | 574721 | 51781  | 6671421 | 0.8411 | 0.001996 | 100 -       | 290139 | 25049  | 3242509 |
| Etal | Hhim           | Hpar           | Hnum | 0.0244 | 0.002511 | 9.699 best  | 41165  | 39207  | 6671421 | 0.0176 | 0.005227 | 3.373 best  | 19946  | 19254  | 3242509 |
| Etal | Hpar           | Hhim           | Hnum | 0.8803 | 0.00167  | 100 -       | 615714 | 39207  | 6671421 | 0.8826 | 0.002168 | 100 -       | 308631 | 19254  | 3242509 |
| Etal | Hnum           | Hhim           | Hpar | 0.8747 | 0.001765 | 100 -       | 615714 | 41165  | 6671421 | 0.8786 | 0.00192  | 100 -       | 308631 | 19946  | 3242509 |
| Etal | Hhim           | Hpar           | Htim | 0.0136 | 0.003289 | 4.121 best  | 42991  | 41841  | 6671421 | 0.0054 | 0.004697 | 1.158 best  | 20694  | 20470  | 3242509 |
| Etal | Hpar           | Hhim           | Htim | 0.87   | 0.002407 | 100 -       | 601873 | 41841  | 6671421 | 0.8733 | 0.002168 | 100 -       | 302529 | 20470  | 3242509 |
| Etal | Htim           | Hhim           | Hpar | 0.8667 | 0.00256  | 100 -       | 601873 | 42991  | 6671421 | 0.872  | 0.002213 | 100 -       | 302529 | 20694  | 3242509 |
| Etal | Hhim           | Hpar           | Hcyd | 0.0192 | 0.003547 | 5.425 best  | 44147  | 42480  | 6671421 | 0.013  | 0.004464 | 2.923 best  | 21216  | 20669  | 3242509 |
| Etal | Hpar           | Hhim           | Hcyd | 0.8668 | 0.002552 | 100 -       | 595001 | 42480  | 6671421 | 0.8707 | 0.002314 | 100 -       | 299020 | 20669  | 3242509 |
| Etal | Hcyd           | Hhim           | Hpar | 0.8619 | 0.002612 | 100 -       | 595001 | 44147  | 6671421 | 0.8675 | 0.002256 | 100 -       | 299020 | 21216  | 3242509 |
| Etal | Hhim           | Hpar           | Hmel | 0.0064 | 0.004473 | 1.431 best  | 42377  | 41838  | 6671421 | 0.0011 | 0.004688 | 0.23 best   | 20010  | 20053  | 3242509 |
| Etal | Hpar           | Hhim           | Hmel | 0.8707 | 0.002158 | 100 -       | 604968 | 41838  | 6671421 | 0.8763 | 0.002159 | 100 -       | 304103 | 20053  | 3242509 |
| Etal | Hmel           | Hhim           | Hpar | 0.8691 | 0.002274 | 100 -       | 604968 | 42377  | 6671421 | 0.8765 | 0.002079 | 100 -       | 304103 | 20010  | 3242509 |
| Etal | Hhim           | Hnum           | Htim | 0.0091 | 0.002871 | 3.178 best  | 43894  | 44702  | 6671421 | 0.0109 | 0.005959 | 1.832 best  | 21199  | 21667  | 3242509 |
| Etal | Hnum           | Hhim           | Htim | 0.8579 | 0.00171  | 100 -       | 584320 | 44702  | 6671421 | 0.863  | 0.001845 | 100 -       | 294564 | 21667  | 3242509 |
| Etal | Htim           | Hhim           | Hnum | 0.8603 | 0.001714 | 100 -       | 584320 | 43894  | 6671421 | 0.8657 | 0.002027 | 100 -       | 294564 | 21199  | 3242509 |
| Etal | Hhim           | Hnum           | Hcyd | 0.0033 | 0.00355  | 0.92 best   | 44366  | 44657  | 6671421 | 0.0034 | 0.005132 | 0.657 best  | 21425  | 21570  | 3242509 |
| Etal | Hnum           | Hhim           | Hcyd | 0.857  | 0.00169  | 100 -       | 580026 | 44657  | 6671421 | 0.8626 | 0.001811 | 100 -       | 292401 | 21570  | 3242509 |
| Etal | Hcyd           | Hhim           | Hnum | 0.8579 | 0.001685 | 100 -       | 580026 | 44366  | 6671421 | 0.8635 | 0.001969 | 100 -       | 292401 | 21425  | 3242509 |
| Etal | Hhim           | Hnum           | Hmel | 0.016  | 0.004421 | 3.615 best  | 43712  | 45131  | 6671421 | 0.0174 | 0.005095 | 3.408 best  | 20802  | 21537  | 3242509 |
| Etal | Hnum           | Hhim           | Hmel | 0.8569 | 0.001859 | 100 -       | 585447 | 45131  | 6671421 | 0.864  | 0.001952 | 100 -       | 295165 | 21537  | 3242509 |
| Etal | Hmel           | Hhim           | Hnum | 0.8611 | 0.001629 | 100 -       | 585447 | 43712  | 6671421 | 0.8683 | 0.001923 | 100 -       | 295165 | 20802  | 3242509 |
| Etal | Hhim           | Htim           | Hcyd | 0.0097 | 0.004421 | 2.19 best   | 27010  | 26493  | 6671421 | 0.0127 | 0.006459 | 1.959 best  | 12892  | 12569  | 3242509 |
| Etal | Htim           | Hhim           | Hcyd | 0.9241 | 0.002295 | 100 -       | 671543 | 26493  | 6671421 | 0.9282 | 0.002125 | 100 -       | 337470 | 12569  | 3242509 |
| Etal | Hcyd           | Hhim           | Htim | 0.9227 | 0.002383 | 100 -       | 671543 | 27010  | 6671421 | 0.9264 | 0.002072 | 100 -       | 337470 | 12892  | 3242509 |
| Etal | Hhim           | Htim           | Hmel | 0.0105 | 0.005577 | 1.877 best  | 28773  | 29384  | 6671421 | 0.0095 | 0.0058   | 1.637 best  | 13934  | 14201  | 3242509 |
| Etal | Htim           | Hhim           | Hmel | 0.9152 | 0.001775 | 100 -       | 663471 | 29384  | 6671421 | 0.9179 | 0.001649 | 100 -       | 331754 | 14201  | 3242509 |
| Etal | Hmel           | Hhim           | Htim | 0.9169 | 0.001937 | 100 -       | 663471 | 28773  | 6671421 | 0.9194 | 0.001618 | 100 -       | 331754 | 13934  | 3242509 |
| Etal | Hhim           | Hcyd           | Hmel | 0.0194 | 0.004337 | 4.468 best  | 28514  | 29642  | 6671421 | 0.0211 | 0.0062   | 3.406 best  | 13675  | 14265  | 3242509 |
| Etal | Hcyd           | Hhim           | Hmel | 0.9142 | 0.001672 | 100 -       | 661151 | 29642  | 6671421 | 0.9172 | 0.001618 | 100 -       | 330262 | 14265  | 3242509 |
| Etal | Hmel           | Hhim           | Hcyd | 0.9173 | 0.001751 | 100 -       | 661151 | 28514  | 6671421 | 0.9205 | 0.001565 | 100 -       | 330262 | 13675  | 3242509 |
| Etal | HeraHhimHyHsar | Hdem           |      | 0.1299 | 0.003917 | 33.17 best  | 68706  | 52906  | 6671421 | 0.1325 | 0.004842 | 27.368 best | 33183  | 25417  | 3242509 |
| Etal | Hsar           | HeraHhimHyHdem |      | 0.5166 | 0.003789 | 100 -       | 165970 | 52906  | 6671421 | 0.5312 | 0.00325  | 100 -       | 83013  | 25417  | 3242509 |
| Etal | Hdem           | HeraHhimHyHsar |      | 0.4145 | 0.003962 | 100 -       | 165970 | 68706  | 6671421 | 0.4288 | 0.003661 | 100 -       | 83013  | 33183  | 3242509 |
| Etal | HeraHhimHyHsar | Ldor           |      | 0.6664 | 0.003249 | 100 -       | 85839  | 428671 | 6671421 | 0.6969 | 0.002763 | 100 -       | 40680  | 227763 | 3242509 |
| Etal | Hsar           | HeraHhimHyLdor |      | 0.7019 | 0.002536 | 100 -       | 75103  | 428671 | 6671421 | 0.7291 | 0.002224 | 100 -       | 35680  | 227763 | 3242509 |
| Etal | Ldor           | HeraHhimHyHsar |      | 0.6667 | 0.002844 | 23.455 best | 75103  | 85839  | 6671421 | 0.6655 | 0.003269 | 20.033 best | 35680  | 40680  | 3242509 |
| Etal | HeraHhimHyHsar | Hbes           |      | 0.6582 | 0.003154 | 100 -       | 86164  | 417961 | 6671421 | 0.6733 | 0.002807 | 100 -       | 41558  | 212847 | 3242509 |
| Etal | Hsar           | HeraHhimHyHbes |      | 0.7035 | 0.00279  | 100 -       | 72763  | 417961 | 6671421 | 0.7114 | 0.002626 | 100 -       | 35897  | 212847 | 3242509 |
| Etal | Hbes           | HeraHhimHyHsar |      | 0.0843 | 0.002917 | 28.905 best | 72763  | 86164  | 6671421 | 0.0731 | 0.003652 | 20.012 best | 35897  | 41558  | 3242509 |
| Etal | HeraHhimHyHsar | Hpar           |      | 0.6567 | 0.003176 | 100 -       | 86075  | 415277 | 6671421 | 0.6723 | 0.002784 | 100 -       | 41352  | 210978 | 3242509 |
| Etal | Hsar           | HeraHhimHyHpar |      | 0.7041 | 0.003038 | 100 -       | 72128  | 415277 | 6671421 | 0.7105 | 0.00277  | 100 -       | 35703  | 210978 | 3242509 |
| Etal | Hpar           | HeraHhimHyHsar |      | 0.0882 | 0.003014 | 29.248 best | 72128  | 86075  | 6671421 | 0.0733 | 0.003515 | 20.856 best | 35703  | 41352  | 3242509 |
| Etal | HeraHhimHyHsar | Hnum           |      | 0.6558 | 0.003151 | 100 -       | 85864  | 412989 | 6671421 | 0.6724 | 0.002787 | 100 -       | 41150  | 210072 | 3242509 |
| Etal | Hsar           | HeraHhimHyHnum |      | 0.7047 | 0.003076 | 100 -       | 71534  | 412989 | 6671421 | 0.7109 | 0.002772 | 100 -       | 35501  | 210072 | 3242509 |
| Etal | Hnum           | HeraHhimHyHsar |      | 0.091  | 0.002733 | 33.314 best | 71534  | 85864  | 6671421 | 0.0737 | 0.00349  | 21.117 best | 35501  | 41150  | 3242509 |
| Etal | HeraHhimHyHsar | Htim           |      | 0.6575 | 0.003178 | 100 -       | 85435  | 413424 | 6671421 | 0.6728 | 0.002809 | 100 -       | 41184  | 210515 | 3242509 |
| Etal | Hsar           | HeraHhimHyHtim |      | 0.7041 | 0.00295  | 100 -       | 71798  | 413424 | 6671421 | 0.7118 | 0.002786 | 100 -       | 35448  | 210515 | 3242509 |
| Etal | Htim           | HeraHhimHyHsar |      | 0.0867 | 0.003102 | 27.955 best | 71798  | 85435  | 6671421 | 0.0748 | 0.003763 | 19.889 best | 35448  | 41184  | 3242509 |
| Etal | HeraHhimHyHsar | Hcyd           |      | 0.6579 | 0.003147 | 100 -       | 85145  | 412639 | 6671421 | 0.6732 | 0.002799 | 100 -       | 41035  | 210103 | 3242509 |
| Etal | Hsar           | HeraHhimHyHcyd |      | 0.7045 | 0.002831 | 100 -       | 71533  | 412639 | 6671421 | 0.7124 | 0.002733 | 100 -       | 35286  | 210103 | 3242509 |
| Etal | Hcyd           | HeraHhimHyHsar |      | 0.0869 | 0.002679 | 32.429 best | 71533  | 85145  | 6671421 | 0.0753 | 0.003583 | 21.021 best | 35286  | 41035  | 3242509 |
| Etal | HeraHhimHyHsar | Hmel           |      | 0.6578 | 0.003254 | 100 -       | 85477  | 414050 | 6671421 | 0.674  | 0.002897 | 100 -       | 41020  | 210651 | 3242509 |
| Etal | Hsar           | HeraHhimHyHmel |      | 0.704  | 0.002969 | 100 -       | 71918  | 414050 | 6671421 | 0.7125 | 0.002817 | 100 -       | 35370  | 210651 | 3242509 |
| Etal | Hmel           | HeraHhimHyHsar |      | 0.0861 | 0.003091 | 27.87 best  | 71918  | 85477  | 6671421 | 0.074  | 0.003791 | 19.508 best | 35370  | 41020  | 3242509 |
| Etal | HeraHhimHyHdem | Ldor           |      | 0.7151 | 0.002529 | 100 -       | 71456  | 430088 | 6671421 | 0.743  | 0.00219  | 100 -       | 33699  | 228548 | 3242509 |
| Etal | Hdem           | HeraHhimHyLdor |      | 0.7218 | 0.002537 | 100 -       | 69494  | 430088 | 6671421 | 0.7463 | 0.002209 | 100 -       | 33201  | 228548 | 3242509 |
| Etal | Ldor           | HeraHhimHyHdem |      | 0.0139 | 0.003223 | 4.32 best   | 69494  | 71456  | 6671421 | 0.0074 | 0.003804 | 1.957 best  | 33201  | 33699  | 3242509 |
| Etal | HeraHhimHyHdem | Hbes           |      | 0.7082 | 0.002414 | 100 -       | 71626  | 419223 | 6671421 | 0.7221 | 0.002323 | 100 -       | 34453  | 213508 | 3242509 |
| Etal | Hdem           | HeraHhimHyHbes |      | 0.7211 | 0.002469 | 100 -       | 67930  | 419223 | 6671421 | 0.7284 | 0.002362 | 100 -       | 33547  | 213508 | 3242509 |
| Etal | Hbes           | HeraHhimHyHdem |      | 0.0265 | 0.002648 | 10.002 best | 67930  | 71626  | 6671421 | 0.0133 | 0.00435  | 3.062 best  | 33547  | 34453  | 3242509 |
| Etal | HeraHhimHyHdem | Hpar           |      | 0.7067 | 0.002557 | 100 -       | 71615  | 416617 | 6671421 | 0.7212 | 0.0023   | 100 -       | 34296  | 211688 | 3242509 |
| Etal | Hdem           | HeraHhimHyHpar |      | 0.7213 | 0.00259  | 100 -       | 67452  | 416617 | 6671421 | 0.7294 | 0.002379 | 100 -       | 33123  | 211688 | 3242509 |
| Etal | Hpar           | HeraHhimHyHdem |      | 0.0299 | 0.002817 | 10.629 best | 67452  | 71615  | 6671421 | 0.0174 | 0.004032 | 4.315 best  | 33123  | 34296  | 3242509 |
| Etal | HeraHhimHyHdem | Hnum           |      | 0.7059 | 0.002502 | 100 -       | 71436  | 414361 | 6671421 | 0.7216 | 0.002349 | 100 -       | 34092  | 210780 | 3242509 |
| Etal | Hdem           | HeraHhimHyHnum |      | 0.7216 | 0.002774 | 100 -       | 67000  | 414361 | 6671421 | 0.7292 | 0.002401 | 100 -       | 33011  | 210780 | 3242509 |
| Etal | Hnum           | HeraHhimHyHdem |      | 0.032  | 0.002594 | 12.356 best | 67000  | 71436  | 6671421 | 0.0161 | 0.004345 | 3.708 best  | 33011  | 34092  | 3242509 |
| Etal | HeraHhimHyHdem | Htim           |      | 0.7079 | 0.002558 | 100 -       | 70935  | 414724 | 6671421 | 0.7226 | 0.002452 | 100 -       | 34002  | 211099 | 3242509 |
| Etal | Hdem           | HeraHhimHyHtim |      | 0.7214 | 0.00272  | 100 -       | 67126  | 414724 | 6671421 | 0.7294 | 0.00243  | 100 -       | 33039  | 211099 | 3242509 |
| Etal | Htim           | HeraHhimHyHdem |      | 0.0276 | 0.002875 | 9.599 best  | 67126  | 70935  | 6671421 | 0.0144 | 0.004331 | 3.317 best  | 33039  | 34002  | 3242509 |
| Etal | HeraHhimHyHdem | Hcyd           |      | 0.7085 | 0.002582 | 100 -       | 70610  | 413904 | 6671421 | 0.7233 | 0.0      |             |        |        |         |

|      |            |            |      |        |          |             |        |        |         |        |          |             |         |        |         |
|------|------------|------------|------|--------|----------|-------------|--------|--------|---------|--------|----------|-------------|---------|--------|---------|
| Etal | Hbes       | HeraHhimHy | Hpar | 0.8549 | 0.001435 | 100 -       | 594416 | 46506  | 6671421 | 0.8607 | 0.002074 | 100 -       | 299781  | 22453  | 3242509 |
| Etal | Hpar       | HeraHhimHy | Hbes | 0.8474 | 0.001596 | 100 -       | 594416 | 49101  | 6671421 | 0.8511 | 0.001964 | 100 -       | 299781  | 24116  | 3242509 |
| Etal | HeraHhimHy | Hbes       | Hnum | 0.0529 | 0.004093 | 12.915 best | 46527  | 41855  | 6671421 | 0.0548 | 0.00508  | 10.789 best | 22775   | 20408  | 3242509 |
| Etal | Hbes       | HeraHhimHy | Hnum | 0.8705 | 0.001877 | 100 -       | 604209 | 41855  | 6671421 | 0.8745 | 0.002278 | 100 -       | 304738  | 20408  | 3242509 |
| Etal | Hnum       | HeraHhimHy | Hbes | 0.857  | 0.002142 | 100 -       | 604209 | 46527  | 6671421 | 0.8609 | 0.002253 | 100 -       | 304738  | 22775  | 3242509 |
| Etal | HeraHhimHy | Hbes       | Htim | 0.0383 | 0.004002 | 9.567 best  | 51628  | 47820  | 6671421 | 0.0403 | 0.005018 | 8.032 best  | 25267   | 23309  | 3242509 |
| Etal | Hbes       | HeraHhimHy | Htim | 0.8463 | 0.001484 | 100 -       | 574244 | 47820  | 6671421 | 0.8512 | 0.00208  | 100 -       | 290036  | 23309  | 3242509 |
| Etal | Htim       | HeraHhimHy | Hbes | 0.835  | 0.001865 | 100 -       | 574244 | 51628  | 6671421 | 0.8397 | 0.002101 | 100 -       | 290036  | 25267  | 3242509 |
| Etal | HeraHhimHy | Hbes       | Hcyd | 0.0433 | 0.003765 | 11.496 best | 51861  | 47558  | 6671421 | 0.0457 | 0.004501 | 10.154 best | 25408   | 23187  | 3242509 |
| Etal | Hbes       | HeraHhimHy | Hcyd | 0.8465 | 0.001586 | 100 -       | 571911 | 47558  | 6671421 | 0.8514 | 0.002092 | 100 -       | 288779  | 23187  | 3242509 |
| Etal | Hcyd       | HeraHhimHy | Hbes | 0.8337 | 0.001918 | 100 -       | 571911 | 51861  | 6671421 | 0.8383 | 0.002121 | 100 -       | 288779  | 25408  | 3242509 |
| Etal | HeraHhimHy | Hbes       | Hmel | 0.0321 | 0.003992 | 8.048 best  | 51771  | 48547  | 6671421 | 0.0342 | 0.005328 | 6.422 best  | 25044   | 23386  | 3242509 |
| Etal | Hbes       | HeraHhimHy | Hmel | 0.8442 | 0.001743 | 100 -       | 574737 | 48547  | 6671421 | 0.8509 | 0.002222 | 100 -       | 290266  | 23386  | 3242509 |
| Etal | Hmel       | HeraHhimHy | Hbes | 0.8347 | 0.001823 | 100 -       | 574737 | 51771  | 6671421 | 0.8412 | 0.001938 | 100 -       | 290266  | 25044  | 3242509 |
| Etal | HeraHhimHy | Hpar       | Hnum | 0.0259 | 0.002633 | 9.829 best  | 41159  | 39082  | 6671421 | 0.018  | 0.005109 | 3.515 best  | 19934   | 19230  | 3242509 |
| Etal | Hpar       | HeraHhimHy | Hnum | 0.8806 | 0.001669 | 100 -       | 615705 | 39082  | 6671421 | 0.8828 | 0.002132 | 100 -       | 308777  | 19230  | 3242509 |
| Etal | Hnum       | HeraHhimHy | Hpar | 0.8747 | 0.001779 | 100 -       | 615705 | 41159  | 6671421 | 0.8787 | 0.001909 | 100 -       | 308777  | 19934  | 3242509 |
| Etal | HeraHhimHy | Hpar       | Htim | 0.0143 | 0.003375 | 4.24 best   | 42976  | 41763  | 6671421 | 0.0072 | 0.004571 | 1.568 best  | 20717   | 20422  | 3242509 |
| Etal | Hpar       | HeraHhimHy | Htim | 0.8703 | 0.002403 | 100 -       | 601911 | 41763  | 6671421 | 0.8736 | 0.002145 | 100 -       | 302651  | 20422  | 3242509 |
| Etal | Htim       | HeraHhimHy | Hpar | 0.8667 | 0.002554 | 100 -       | 601911 | 42976  | 6671421 | 0.8719 | 0.002219 | 100 -       | 302651  | 20717  | 3242509 |
| Etal | HeraHhimHy | Hpar       | Hcyd | 0.0197 | 0.003465 | 5.695 best  | 44128  | 42420  | 6671421 | 0.0133 | 0.004451 | 2.992 best  | 21206   | 20648  | 3242509 |
| Etal | Hpar       | HeraHhimHy | Hcyd | 0.8669 | 0.002524 | 100 -       | 595057 | 42420  | 6671421 | 0.8709 | 0.002308 | 100 -       | 299169  | 20648  | 3242509 |
| Etal | Hcyd       | HeraHhimHy | Hpar | 0.862  | 0.002636 | 100 -       | 595057 | 44128  | 6671421 | 0.8676 | 0.002243 | 100 -       | 299169  | 21206  | 3242509 |
| Etal | HeraHhimHy | Hpar       | Hmel | 0.0075 | 0.004214 | 1.775 best  | 42377  | 41748  | 6671421 | 0.0001 | 0.00457  | 0.028 best  | 20011   | 20016  | 3242509 |
| Etal | Hpar       | HeraHhimHy | Hmel | 0.8709 | 0.002114 | 100 -       | 604994 | 41748  | 6671421 | 0.8766 | 0.002114 | 100 -       | 304236  | 20016  | 3242509 |
| Etal | Hmel       | HeraHhimHy | Hpar | 0.8691 | 0.0023   | 100 -       | 604994 | 42377  | 6671421 | 0.8766 | 0.00204  | 100 -       | 304236  | 20011  | 3242509 |
| Etal | HeraHhimHy | Hnum       | Htim | 0.0098 | 0.002968 | 3.292 best  | 43778  | 44642  | 6671421 | 0.0096 | 0.005938 | 1.609 best  | 21187   | 21596  | 3242509 |
| Etal | Hnum       | HeraHhimHy | Htim | 0.858  | 0.001701 | 100 -       | 584257 | 44642  | 6671421 | 0.8634 | 0.001816 | 100 -       | 294651  | 21596  | 3242509 |
| Etal | Htim       | HeraHhimHy | Hnum | 0.8606 | 0.001775 | 100 -       | 584257 | 43778  | 6671421 | 0.8658 | 0.002077 | 100 -       | 294651  | 21187  | 3242509 |
| Etal | HeraHhimHy | Hnum       | Hcyd | 0.0042 | 0.00363  | 1.144 best  | 44208  | 44577  | 6671421 | 0.0034 | 0.005115 | 0.664 best  | 21397   | 21543  | 3242509 |
| Etal | Hnum       | HeraHhimHy | Hcyd | 0.8573 | 0.001638 | 100 -       | 579943 | 44577  | 6671421 | 0.8628 | 0.001776 | 100 -       | 292532  | 21543  | 3242509 |
| Etal | Hcyd       | HeraHhimHy | Hnum | 0.8584 | 0.001746 | 100 -       | 579943 | 44208  | 6671421 | 0.8637 | 0.001991 | 100 -       | 292532  | 21397  | 3242509 |
| Etal | HeraHhimHy | Hnum       | Hmel | 0.0164 | 0.004515 | 3.622 best  | 43575  | 45023  | 6671421 | 0.0168 | 0.005196 | 3.231 best  | 20772   | 21481  | 3242509 |
| Etal | Hnum       | HeraHhimHy | Hmel | 0.8572 | 0.001833 | 100 -       | 585336 | 45023  | 6671421 | 0.8644 | 0.001966 | 100 -       | 295267  | 21481  | 3242509 |
| Etal | Hmel       | HeraHhimHy | Hnum | 0.8614 | 0.001669 | 100 -       | 585336 | 43575  | 6671421 | 0.8686 | 0.001907 | 100 -       | 295267  | 20772  | 3242509 |
| Etal | HeraHhimHy | Htim       | Hcyd | 0.0093 | 0.004385 | 2.116 best  | 26984  | 26489  | 6671421 | 0.0103 | 0.006191 | 1.66 best   | 12874   | 12611  | 3242509 |
| Etal | Htim       | HeraHhimHy | Hcyd | 0.9241 | 0.002314 | 100 -       | 671592 | 26489  | 6671421 | 0.928  | 0.002158 | 100 -       | 337611  | 12611  | 3242509 |
| Etal | Hcyd       | HeraHhimHy | Htim | 0.9228 | 0.002428 | 100 -       | 671592 | 26984  | 6671421 | 0.9266 | 0.002063 | 100 -       | 337611  | 12874  | 3242509 |
| Etal | HeraHhimHy | Htim       | Hmel | 0.01   | 0.005513 | 1.816 best  | 28753  | 29337  | 6671421 | 0.0107 | 0.006171 | 1.728 best  | 13929   | 14229  | 3242509 |
| Etal | Htim       | HeraHhimHy | Hmel | 0.9153 | 0.001771 | 100 -       | 663477 | 29337  | 6671421 | 0.9178 | 0.001715 | 100 -       | 331881  | 14229  | 3242509 |
| Etal | Hmel       | HeraHhimHy | Htim | 0.9169 | 0.001967 | 100 -       | 663477 | 28753  | 6671421 | 0.9195 | 0.00162  | 100 -       | 331881  | 13929  | 3242509 |
| Etal | HeraHhimHy | Hcyd       | Hmel | 0.0186 | 0.004587 | 4.048 best  | 28483  | 29562  | 6671421 | 0.0202 | 0.006175 | 3.266 best  | 13675   | 14238  | 3242509 |
| Etal | Hcyd       | HeraHhimHy | Hmel | 0.9144 | 0.001666 | 100 -       | 661146 | 29562  | 6671421 | 0.9174 | 0.001624 | 100 -       | 330394  | 14238  | 3242509 |
| Etal | Hmel       | HeraHhimHy | Hcyd | 0.9174 | 0.001755 | 100 -       | 661146 | 28483  | 6671421 | 0.9205 | 0.001577 | 100 -       | 330394  | 13675  | 3242509 |
| Etal | Hsar       | Hdem       | Ldor | 0.8139 | 0.001275 | 100 -       | 53356  | 51988  | 6671421 | 0.8331 | 0.001178 | 100 -       | 25010   | 274689 | 3242509 |
| Etal | Hdem       | Hsar       | Ldor | 0.7866 | 0.001944 | 100 -       | 62130  | 51988  | 6671421 | 0.806  | 0.001674 | 100 -       | 29512   | 274689 | 3242509 |
| Etal | Ldor       | Hsar       | Hdem | 0.076  | 0.003338 | 22.761 best | 62130  | 53356  | 6671421 | 0.0826 | 0.004469 | 18.478 best | 29512   | 25010  | 3242509 |
| Etal | Hsar       | Hdem       | Hbes | 0.8161 | 0.001458 | 100 -       | 51649  | 509911 | 6671421 | 0.824  | 0.001408 | 100 -       | 25052   | 259598 | 3242509 |
| Etal | Hdem       | Hsar       | Hbes | 0.7852 | 0.001859 | 100 -       | 61354  | 509911 | 6671421 | 0.794  | 0.001793 | 100 -       | 29807   | 259598 | 3242509 |
| Etal | Hbes       | Hsar       | Hdem | 0.0859 | 0.003959 | 21.691 best | 61354  | 51649  | 6671421 | 0.0867 | 0.004873 | 17.789 best | 29807   | 25052  | 3242509 |
| Etal | Hsar       | Hdem       | Hpar | 0.817  | 0.001442 | 100 -       | 51107  | 507320 | 6671421 | 0.8236 | 0.001417 | 100 -       | 24933   | 257804 | 3242509 |
| Etal | Hdem       | Hsar       | Hpar | 0.7857 | 0.001834 | 100 -       | 60891  | 507320 | 6671421 | 0.7952 | 0.001869 | 100 -       | 29409   | 257804 | 3242509 |
| Etal | Hpar       | Hsar       | Hdem | 0.0874 | 0.003586 | 24.363 best | 60891  | 51107  | 6671421 | 0.0824 | 0.004855 | 16.968 best | 29409   | 24933  | 3242509 |
| Etal | Hsar       | Hdem       | Hnum | 0.8172 | 0.001595 | 100 -       | 50825  | 505344 | 6671421 | 0.824  | 0.001412 | 100 -       | 24798   | 256965 | 3242509 |
| Etal | Hdem       | Hsar       | Hnum | 0.7855 | 0.00203  | 100 -       | 60719  | 505344 | 6671421 | 0.7949 | 0.001919 | 100 -       | 29366   | 256965 | 3242509 |
| Etal | Hnum       | Hsar       | Hdem | 0.0887 | 0.003913 | 22.67 best  | 60719  | 50825  | 6671421 | 0.0843 | 0.00463  | 18.218 best | 29366   | 24798  | 3242509 |
| Etal | Hsar       | Hdem       | Htim | 0.8168 | 0.001519 | 100 -       | 50981  | 505671 | 6671421 | 0.8249 | 0.001452 | 100 -       | 24701   | 257364 | 3242509 |
| Etal | Hdem       | Hsar       | Htim | 0.7853 | 0.001959 | 100 -       | 60809  | 505671 | 6671421 | 0.7945 | 0.001748 | 100 -       | 29474   | 257364 | 3242509 |
| Etal | Htim       | Hsar       | Hdem | 0.0879 | 0.004027 | 21.829 best | 60809  | 50981  | 6671421 | 0.0881 | 0.004239 | 20.786 best | 29474   | 24701  | 3242509 |
| Etal | Hsar       | Hdem       | Hcyd | 0.8176 | 0.001495 | 100 -       | 50670  | 504840 | 6671421 | 0.8256 | 0.001432 | 100 -       | 24550   | 256963 | 3242509 |
| Etal | Hdem       | Hsar       | Hcyd | 0.7854 | 0.001928 | 100 -       | 60673  | 504840 | 6671421 | 0.7946 | 0.001816 | 100 -       | 29418   | 256963 | 3242509 |
| Etal | Hcyd       | Hsar       | Hdem | 0.0898 | 0.003731 | 24.079 best | 60673  | 50670  | 6671421 | 0.0902 | 0.004249 | 21.228 best | 29418   | 24550  | 3242509 |
| Etal | Hsar       | Hdem       | Hmel | 0.817  | 0.001569 | 100 -       | 50995  | 506191 | 6671421 | 0.8253 | 0.001486 | 100 -       | 24652   | 257529 | 3242509 |
| Etal | Hdem       | Hsar       | Hmel | 0.786  | 0.001958 | 100 -       | 60660  | 506191 | 6671421 | 0.7954 | 0.001795 | 100 -       | 29356   | 257529 | 3242509 |
| Etal | Hmel       | Hsar       | Hdem | 0.0866 | 0.004013 | 21.57 best  | 60660  | 50995  | 6671421 | 0.0871 | 0.004193 | 20.775 best | 29356   | 24652  | 3242509 |
| Etal | Hsar       | Ldor       | Hbes | 0.0329 | 0.003556 | 9.246 best  | 131471 | 123101 | 6671421 | 0.1098 | 0.003748 | 29.309 best | 76452   | 61319  | 3242509 |
| Etal | Ldor       | Hsar       | Hbes | 0.405  | 0.004207 | 96.279 best | 290705 | 123101 | 6671421 | 0.3991 | 0.003694 | 100 -       | 142768  | 61319  | 3242509 |
| Etal | Hbes       | Hsar       | Ldor | 0.3772 | 0.003863 | 97.634 best | 290705 | 131471 | 6671421 | 0.3025 | 0.003555 | 85.086 -    | 142768  | 76452  | 3242509 |
| Etal | Hsar       | Ldor       | Hpar | 0.0415 | 0.003586 | 11.578 best | 130709 | 120290 | 6671421 | 0.1239 | 0.00357  | 34.703 best | 76248   | 59440  | 3242509 |
| Etal | Ldor       | Hsar       | Hpar | 0.4132 | 0.004024 | 100 -       | 289701 | 120290 | 6671421 | 0.4104 | 0.003445 | 100 -       | 142182  | 59440  | 3242509 |
| Etal | Hpar       | Hsar       | Ldor | 0.3782 | 0.003769 | 100 -       | 289701 | 130709 | 6671421 | 0.3019 | 0.003441 | 87.714 -    | 142182  | 76248  | 3242509 |
| Etal | Hsar       | Ldor       | Hnum | 0.0489 | 0.003645 | 13.409 best | 129970 | 117857 | 6671421 | 0.1307 | 0.004235 | 30.862 best | 75756   | 58244  | 3242509 |
| Etal | Ldor       | Hsar       | Hnum | 0.4213 | 0.004139 | 100 -       | 289445 | 117857 | 6671421 | 0.4184 | 0.003903 | 100 -       | 142037  | 58244  | 3242509 |
| Etal | Hnum       | Hsar       | Ldor | 0.3802 | 0.003943 | 96.444 -    | 289445 | 129970 | 6671421 | 0.3043 | 0.003456 | 88.055 -    | 142037  | 75756  | 3242509 |
| Etal | Hsar       | Ldor       | Htim | 0.0482 | 0.003383 | 14.251 best | 129838 | 117896 | 6671421 | 0.1268 | 0.003712 | 34.156 best | 75607</ |        |         |

|      |      |      |      |        |          |             |        |        |         |        |          |             |        |       |         |
|------|------|------|------|--------|----------|-------------|--------|--------|---------|--------|----------|-------------|--------|-------|---------|
| Etal | Hnum | Hsar | Hpar | 0.8772 | 0.001917 | 100 -       | 630099 | 41223  | 6671421 | 0.8789 | 0.002004 | 100 -       | 314789 | 20297 | 3242509 |
| Etal | Hsar | Hpar | Htim | 0.0178 | 0.003261 | 5.453 best  | 43579  | 42056  | 6671421 | 0.005  | 0.004603 | 1.08 best   | 20995  | 20787 | 3242509 |
| Etal | Hpar | Hsar | Htim | 0.8722 | 0.002261 | 100 -       | 616151 | 42056  | 6671421 | 0.8738 | 0.002176 | 100 -       | 308665 | 20787 | 3242509 |
| Etal | Htim | Hsar | Hpar | 0.8679 | 0.002414 | 100 -       | 616151 | 43579  | 6671421 | 0.8726 | 0.002179 | 100 -       | 308665 | 20995 | 3242509 |
| Etal | Hsar | Hpar | Hcyd | 0.0234 | 0.003683 | 6.357 best  | 44648  | 42605  | 6671421 | 0.0108 | 0.00442  | 2.434 best  | 21471  | 21013 | 3242509 |
| Etal | Hpar | Hsar | Hcyd | 0.8693 | 0.002328 | 100 -       | 609189 | 42605  | 6671421 | 0.8712 | 0.002352 | 100 -       | 305183 | 21013 | 3242509 |
| Etal | Hcyd | Hsar | Hpar | 0.8635 | 0.002487 | 100 -       | 609189 | 44648  | 6671421 | 0.8686 | 0.00215  | 100 -       | 305183 | 21471 | 3242509 |
| Etal | Hsar | Hpar | Hmel | 0.012  | 0.004144 | 2.892 best  | 42972  | 41955  | 6671421 | 0.0002 | 0.004609 | 0.033 best  | 20382  | 20388 | 3242509 |
| Etal | Hpar | Hsar | Hmel | 0.8731 | 0.00201  | 100 -       | 619148 | 41955  | 6671421 | 0.8767 | 0.002106 | 100 -       | 310257 | 20388 | 3242509 |
| Etal | Hmel | Hsar | Hpar | 0.8702 | 0.002217 | 100 -       | 619148 | 42972  | 6671421 | 0.8767 | 0.002094 | 100 -       | 310257 | 20382 | 3242509 |
| Etal | Hsar | Hnum | Htim | 0.0019 | 0.002883 | 0.665 best  | 44549  | 44720  | 6671421 | 0.0114 | 0.005519 | 2.067 best  | 21493  | 21989 | 3242509 |
| Etal | Hnum | Hsar | Htim | 0.861  | 0.001748 | 100 -       | 598665 | 44720  | 6671421 | 0.8637 | 0.00188  | 100 -       | 300693 | 21989 | 3242509 |
| Etal | Htim | Hsar | Hnum | 0.8615 | 0.001653 | 100 -       | 598665 | 44549  | 6671421 | 0.8666 | 0.001826 | 100 -       | 300693 | 21493 | 3242509 |
| Etal | Hsar | Hnum | Hcyd | 0.0039 | 0.003618 | 1.076 best  | 44983  | 44634  | 6671421 | 0.0056 | 0.004845 | 1.165 best  | 21680  | 21926 | 3242509 |
| Etal | Hnum | Hsar | Hcyd | 0.8603 | 0.00171  | 100 -       | 594330 | 44634  | 6671421 | 0.8632 | 0.001888 | 100 -       | 298564 | 21926 | 3242509 |
| Etal | Hcyd | Hsar | Hnum | 0.8593 | 0.001552 | 100 -       | 594330 | 44983  | 6671421 | 0.8646 | 0.001797 | 100 -       | 298564 | 21680 | 3242509 |
| Etal | Hsar | Hnum | Hmel | 0.0076 | 0.004426 | 1.709 best  | 44474  | 45151  | 6671421 | 0.0165 | 0.004581 | 3.601 best  | 21172  | 21882 | 3242509 |
| Etal | Hnum | Hsar | Hmel | 0.86   | 0.001992 | 100 -       | 599794 | 45151  | 6671421 | 0.8646 | 0.001945 | 100 -       | 301317 | 21882 | 3242509 |
| Etal | Hmel | Hsar | Hnum | 0.8619 | 0.001675 | 100 -       | 599794 | 44474  | 6671421 | 0.8687 | 0.001877 | 100 -       | 301317 | 21172 | 3242509 |
| Etal | Hsar | Htim | Hcyd | 0.0096 | 0.004391 | 2.193 best  | 27343  | 26823  | 6671421 | 0.0096 | 0.005799 | 1.653 best  | 13114  | 12864 | 3242509 |
| Etal | Htim | Hsar | Hcyd | 0.9247 | 0.00228  | 100 -       | 685563 | 26823  | 6671421 | 0.9278 | 0.002133 | 100 -       | 343600 | 12864 | 3242509 |
| Etal | Hcyd | Hsar | Htim | 0.9233 | 0.002412 | 100 -       | 685563 | 27343  | 6671421 | 0.9265 | 0.002021 | 100 -       | 343600 | 13114 | 3242509 |
| Etal | Hsar | Htim | Hmel | 0.0085 | 0.005028 | 1.699 best  | 29256  | 29762  | 6671421 | 0.0075 | 0.005421 | 1.381 best  | 14201  | 14415 | 3242509 |
| Etal | Htim | Hsar | Hmel | 0.9159 | 0.001646 | 100 -       | 677539 | 29762  | 6671421 | 0.9182 | 0.00158  | 100 -       | 337803 | 14415 | 3242509 |
| Etal | Hmel | Hsar | Htim | 0.9172 | 0.00181  | 100 -       | 677539 | 29256  | 6671421 | 0.9193 | 0.001552 | 100 -       | 337803 | 14201 | 3242509 |
| Etal | Hsar | Hcyd | Hmel | 0.0174 | 0.004526 | 3.853 best  | 28889  | 29915  | 6671421 | 0.0163 | 0.005846 | 2.788 best  | 14002  | 14466 | 3242509 |
| Etal | Hcyd | Hsar | Hmel | 0.9152 | 0.001582 | 100 -       | 675111 | 29915  | 6671421 | 0.9175 | 0.001548 | 100 -       | 336371 | 14466 | 3242509 |
| Etal | Hmel | Hsar | Hcyd | 0.9179 | 0.001603 | 100 -       | 675111 | 28889  | 6671421 | 0.9201 | 0.001581 | 100 -       | 336371 | 14002 | 3242509 |
| Etal | Hdem | Ldor | Hbes | 0.0375 | 0.003308 | 11.328 best | 128748 | 119447 | 6671421 | 0.1139 | 0.00379  | 30.054 best | 75233  | 59847 | 3242509 |
| Etal | Ldor | Hdem | Hbes | 0.3994 | 0.004532 | 88.132 -    | 278277 | 119447 | 6671421 | 0.3913 | 0.003915 | 99.964      | 136794 | 59847 | 3242509 |
| Etal | Hbes | Hdem | Ldor | 0.3674 | 0.004011 | 91.589 -    | 278277 | 128748 | 6671421 | 0.2904 | 0.003815 | 76.1 -      | 136794 | 75233 | 3242509 |
| Etal | Hdem | Ldor | Hpar | 0.0467 | 0.003421 | 13.642 best | 128171 | 116742 | 6671421 | 0.1263 | 0.003671 | 34.397 best | 74854  | 58072 | 3242509 |
| Etal | Ldor | Hdem | Hpar | 0.4076 | 0.004252 | 95.87 -     | 277379 | 116742 | 6671421 | 0.4025 | 0.003651 | 100 -       | 136312 | 58072 | 3242509 |
| Etal | Hpar | Hdem | Ldor | 0.3679 | 0.003832 | 96.018 -    | 277379 | 128171 | 6671421 | 0.2911 | 0.003811 | 76.367 -    | 136312 | 74854 | 3242509 |
| Etal | Hdem | Ldor | Hnum | 0.0547 | 0.003321 | 16.475 best | 127567 | 114334 | 6671421 | 0.1338 | 0.004321 | 30.967 best | 74476  | 56898 | 3242509 |
| Etal | Ldor | Hdem | Hnum | 0.4159 | 0.00429  | 96.957 -    | 277148 | 114334 | 6671421 | 0.4107 | 0.004036 | 100 -       | 136189 | 56898 | 3242509 |
| Etal | Hnum | Hdem | Ldor | 0.3696 | 0.003989 | 92.647 -    | 277148 | 127567 | 6671421 | 0.293  | 0.003808 | 76.936 -    | 136189 | 74476 | 3242509 |
| Etal | Hdem | Ldor | Htim | 0.0538 | 0.003175 | 16.943 best | 127303 | 114307 | 6671421 | 0.1313 | 0.003773 | 34.808 best | 74600  | 57173 | 3242509 |
| Etal | Ldor | Hdem | Htim | 0.4156 | 0.004015 | 100 -       | 276868 | 114307 | 6671421 | 0.4084 | 0.003868 | 100 -       | 136109 | 57173 | 3242509 |
| Etal | Htim | Hdem | Ldor | 0.3701 | 0.003777 | 97.967 -    | 276868 | 127303 | 6671421 | 0.2928 | 0.003957 | 74 -        | 136109 | 74460 | 3242509 |
| Etal | Hdem | Ldor | Hcyd | 0.0569 | 0.003172 | 17.952 best | 127056 | 113365 | 6671421 | 0.1346 | 0.003733 | 36.046 best | 74336  | 56704 | 3242509 |
| Etal | Ldor | Hdem | Hcyd | 0.4191 | 0.004098 | 100 -       | 276924 | 113365 | 6671421 | 0.4116 | 0.00387  | 100 -       | 136026 | 56704 | 3242509 |
| Etal | Hcyd | Hdem | Ldor | 0.371  | 0.00387  | 95.863 -    | 276924 | 127056 | 6671421 | 0.2933 | 0.003841 | 76.346 -    | 136026 | 74336 | 3242509 |
| Etal | Hdem | Ldor | Hmel | 0.0509 | 0.003605 | 14.124 best | 127222 | 114895 | 6671421 | 0.1294 | 0.00404  | 32.033 best | 74202  | 57198 | 3242509 |
| Etal | Ldor | Hdem | Hmel | 0.4136 | 0.004477 | 92.384 -    | 276939 | 114895 | 6671421 | 0.408  | 0.003937 | 100 -       | 136028 | 57198 | 3242509 |
| Etal | Hmel | Hdem | Ldor | 0.3705 | 0.00382  | 96.983 -    | 276939 | 127222 | 6671421 | 0.2941 | 0.003893 | 75.538 -    | 136028 | 74202 | 3242509 |
| Etal | Hdem | Hbes | Hpar | 0.0227 | 0.003013 | 7.528 best  | 47978  | 45850  | 6671421 | 0.0304 | 0.00522  | 5.817 best  | 23682  | 22286 | 3242509 |
| Etal | Hbes | Hdem | Hpar | 0.8575 | 0.001403 | 100 -       | 597456 | 45850  | 6671421 | 0.8619 | 0.002032 | 100 -       | 300520 | 22286 | 3242509 |
| Etal | Hpar | Hdem | Hbes | 0.8513 | 0.001634 | 100 -       | 597456 | 47978  | 6671421 | 0.8539 | 0.002039 | 100 -       | 300520 | 23682 | 3242509 |
| Etal | Hdem | Hbes | Hnum | 0.0453 | 0.004227 | 10.715 best | 45384  | 41452  | 6671421 | 0.0511 | 0.0052   | 9.829 best  | 22541  | 20349 | 3242509 |
| Etal | Hbes | Hdem | Hnum | 0.8723 | 0.001822 | 100 -       | 607502 | 41452  | 6671421 | 0.8752 | 0.002183 | 100 -       | 305585 | 20349 | 3242509 |
| Etal | Hnum | Hdem | Hbes | 0.861  | 0.002247 | 100 -       | 607502 | 45384  | 6671421 | 0.8626 | 0.002364 | 100 -       | 305585 | 22541 | 3242509 |
| Etal | Hdem | Hbes | Htim | 0.0377 | 0.003912 | 9.636 best  | 50857  | 47162  | 6671421 | 0.0395 | 0.005204 | 7.581 best  | 25040  | 23139 | 3242509 |
| Etal | Hbes | Hdem | Htim | 0.849  | 0.001522 | 100 -       | 577282 | 47162  | 6671421 | 0.8526 | 0.002061 | 100 -       | 290772 | 23139 | 3242509 |
| Etal | Htim | Hdem | Hbes | 0.8381 | 0.002007 | 100 -       | 577282 | 50857  | 6671421 | 0.8414 | 0.002086 | 100 -       | 290772 | 25040 | 3242509 |
| Etal | Hdem | Hbes | Hcyd | 0.0448 | 0.003524 | 12.726 best | 51141  | 46751  | 6671421 | 0.0466 | 0.004755 | 9.808 best  | 25203  | 22957 | 3242509 |
| Etal | Hbes | Hdem | Hcyd | 0.8496 | 0.001656 | 100 -       | 574800 | 46751  | 6671421 | 0.853  | 0.002093 | 100 -       | 289455 | 22957 | 3242509 |
| Etal | Hcyd | Hdem | Hbes | 0.8366 | 0.00199  | 100 -       | 574800 | 51141  | 6671421 | 0.8398 | 0.002099 | 100 -       | 289455 | 25203 | 3242509 |
| Etal | Hdem | Hbes | Hmel | 0.0307 | 0.003983 | 7.701 best  | 50826  | 47800  | 6671421 | 0.0338 | 0.005363 | 6.294 best  | 24774  | 23156 | 3242509 |
| Etal | Hbes | Hdem | Hmel | 0.8472 | 0.001754 | 100 -       | 577686 | 47800  | 6671421 | 0.8526 | 0.002091 | 100 -       | 290942 | 23156 | 3242509 |
| Etal | Hmel | Hdem | Hbes | 0.8383 | 0.001944 | 100 -       | 577686 | 50826  | 6671421 | 0.8431 | 0.002055 | 100 -       | 290942 | 24774 | 3242509 |
| Etal | Hdem | Hpar | Hnum | 0.0229 | 0.003621 | 6.328 best  | 40268  | 38464  | 6671421 | 0.0205 | 0.005093 | 4.03 best   | 19782  | 18986 | 3242509 |
| Etal | Hpar | Hdem | Hnum | 0.883  | 0.0016   | 100 -       | 619250 | 38464  | 6671421 | 0.8845 | 0.002023 | 100 -       | 309706 | 18986 | 3242509 |
| Etal | Hnum | Hdem | Hpar | 0.8779 | 0.001832 | 100 -       | 619250 | 40268  | 6671421 | 0.8799 | 0.00197  | 100 -       | 309706 | 19782 | 3242509 |
| Etal | Hdem | Hpar | Htim | 0.0188 | 0.00336  | 5.586 best  | 42522  | 40955  | 6671421 | 0.0124 | 0.004965 | 2.5 best    | 20593  | 20088 | 3242509 |
| Etal | Hpar | Hdem | Htim | 0.8733 | 0.002329 | 100 -       | 605266 | 40955  | 6671421 | 0.8759 | 0.002218 | 100 -       | 303490 | 20088 | 3242509 |
| Etal | Htim | Hdem | Hpar | 0.8687 | 0.002566 | 100 -       | 605266 | 42522  | 6671421 | 0.8729 | 0.00224  | 100 -       | 303490 | 20593 | 3242509 |
| Etal | Hdem | Hpar | Hcyd | 0.0266 | 0.003372 | 7.886 best  | 43655  | 41393  | 6671421 | 0.0206 | 0.004577 | 4.494 best  | 21073  | 20223 | 3242509 |
| Etal | Hpar | Hdem | Hcyd | 0.8706 | 0.002436 | 100 -       | 598193 | 41393  | 6671421 | 0.8737 | 0.002389 | 100 -       | 299917 | 20223 | 3242509 |
| Etal | Hcyd | Hdem | Hpar | 0.864  | 0.002579 | 100 -       | 598193 | 43655  | 6671421 | 0.8687 | 0.002231 | 100 -       | 299917 | 21073 | 3242509 |
| Etal | Hdem | Hpar | Hmel | 0.0109 | 0.0045   | 2.415 best  | 41781  | 40883  | 6671421 | 0.0056 | 0.004643 | 1.209 best  | 19910  | 19688 | 3242509 |
| Etal | Hpar | Hdem | Hmel | 0.8741 | 0.002113 | 100 -       | 608292 | 40883  | 6671421 | 0.8788 | 0.002104 | 100 -       | 305081 | 19688 | 3242509 |
| Etal | Hmel | Hdem | Hpar | 0.8715 | 0.002286 | 100 -       | 608292 | 41781  | 6671421 | 0.8775 | 0.002161 | 100 -       | 305081 | 19910 | 3242509 |
| Etal | Hdem | Hnum | Htim | 0.0027 | 0.003346 | 0.815 best  | 43399  | 43636  | 6671421 | 0.0069 | 0.005931 | 1.155 best  | 21088  | 21379 | 3242509 |
| Etal | Hnum | Hdem | Htim | 0.8618 | 0.001691 | 100 -       | 587687 | 43636  | 6671421 | 0.8651 | 0.001874 | 100 -       | 295515 | 21379 | 3242509 |
| Etal | Htim | Hdem | Hnum | 0.8625 | 0.001723 | 100 -       | 587687 | 43399  | 667     |        |          |             |        |       |         |



|      |      |      |      |        |          |             |        |       |         |        |          |             |        |       |         |
|------|------|------|------|--------|----------|-------------|--------|-------|---------|--------|----------|-------------|--------|-------|---------|
| Etal | Ldor | Hbes | Hcyd | 0.0442 | 0.003894 | 11.342 best | 55903  | 51174 | 6671421 | 0.0466 | 0.004331 | 10.765 best | 26659  | 24284 | 3242509 |
| Etal | Hbes | Ldor | Hcyd | 0.7872 | 0.002097 | 100 -       | 429694 | 51174 | 6671421 | 0.8084 | 0.002567 | 100 -       | 229221 | 24284 | 3242509 |
| Etal | Hcyd | Ldor | Hbes | 0.7698 | 0.00295  | 100 -       | 429694 | 55903 | 6671421 | 0.7916 | 0.002784 | 100 -       | 229221 | 26659 | 3242509 |
| Etal | Ldor | Hbes | Hmel | 0.0298 | 0.003685 | 8.097 best  | 55457  | 52243 | 6671421 | 0.0369 | 0.00483  | 7.643 best  | 26445  | 24562 | 3242509 |
| Etal | Hbes | Ldor | Hmel | 0.7845 | 0.002083 | 100 -       | 432600 | 52243 | 6671421 | 0.8076 | 0.002626 | 100 -       | 230787 | 24562 | 3242509 |
| Etal | Hmel | Ldor | Hbes | 0.7728 | 0.002726 | 100 -       | 432600 | 55457 | 6671421 | 0.7944 | 0.002653 | 100 -       | 230787 | 26445 | 3242509 |
| Etal | Ldor | Hpar | Hnum | 0.0253 | 0.004029 | 6.277 best  | 44106  | 41929 | 6671421 | 0.0255 | 0.005123 | 4.987 best  | 21088  | 20037 | 3242509 |
| Etal | Hpar | Ldor | Hnum | 0.8373 | 0.002106 | 100 -       | 473507 | 41929 | 6671421 | 0.8512 | 0.002595 | 100 -       | 249299 | 20037 | 3242509 |
| Etal | Hnum | Ldor | Hpar | 0.8296 | 0.002327 | 100 -       | 473507 | 44106 | 6671421 | 0.844  | 0.002676 | 100 -       | 249299 | 21088 | 3242509 |
| Etal | Ldor | Hpar | Htim | 0.0212 | 0.003471 | 6.102 best  | 46405  | 44481 | 6671421 | 0.0161 | 0.005355 | 3.011 best  | 21943  | 21247 | 3242509 |
| Etal | Hpar | Ldor | Htim | 0.8236 | 0.003527 | 100 -       | 459584 | 44481 | 6671421 | 0.8393 | 0.002816 | 100 -       | 243191 | 21247 | 3242509 |
| Etal | Htim | Ldor | Hpar | 0.8166 | 0.003975 | 100 -       | 459584 | 46405 | 6671421 | 0.8345 | 0.002917 | 100 -       | 243191 | 21943 | 3242509 |
| Etal | Ldor | Hpar | Hcyd | 0.0315 | 0.003573 | 8.817 best  | 47857  | 44935 | 6671421 | 0.0246 | 0.004767 | 5.166 best  | 22513  | 21431 | 3242509 |
| Etal | Hpar | Ldor | Hcyd | 0.8194 | 0.003682 | 100 -       | 452527 | 44935 | 6671421 | 0.8359 | 0.002952 | 100 -       | 239667 | 21431 | 3242509 |
| Etal | Hcyd | Ldor | Hpar | 0.8088 | 0.004196 | 100 -       | 452527 | 47857 | 6671421 | 0.8283 | 0.003107 | 100 -       | 239667 | 22513 | 3242509 |
| Etal | Ldor | Hpar | Hmel | 0.0156 | 0.004001 | 3.901 best  | 45806  | 44399 | 6671421 | 0.0139 | 0.004978 | 2.798 best  | 21505  | 20915 | 3242509 |
| Etal | Hpar | Ldor | Hmel | 0.8249 | 0.003085 | 100 -       | 462600 | 44399 | 6671421 | 0.8426 | 0.00265  | 100 -       | 244850 | 20915 | 3242509 |
| Etal | Hmel | Ldor | Hpar | 0.8199 | 0.003623 | 100 -       | 462600 | 45806 | 6671421 | 0.8386 | 0.00291  | 100 -       | 244850 | 21505 | 3242509 |
| Etal | Ldor | Hnum | Htim | 0.0027 | 0.002888 | 0.918 best  | 47464  | 47171 | 6671421 | 0.0079 | 0.005456 | 1.449 best  | 22268  | 22623 | 3242509 |
| Etal | Hnum | Ldor | Htim | 0.8052 | 0.002467 | 100 -       | 442187 | 47171 | 6671421 | 0.8244 | 0.0025   | 100 -       | 235046 | 22623 | 3242509 |
| Etal | Htim | Ldor | Hnum | 0.8062 | 0.002435 | 100 -       | 442187 | 47464 | 6671421 | 0.8269 | 0.002419 | 100 -       | 235046 | 22268 | 3242509 |
| Etal | Ldor | Hnum | Hcyd | 0.0078 | 0.00339  | 2.302 best  | 48121  | 47376 | 6671421 | 0.0007 | 0.005004 | 0.139 best  | 22484  | 22453 | 3242509 |
| Etal | Hnum | Ldor | Hcyd | 0.8046 | 0.002466 | 100 -       | 437597 | 47376 | 6671421 | 0.8241 | 0.002402 | 100 -       | 232810 | 22453 | 3242509 |
| Etal | Hcyd | Ldor | Hnum | 0.8019 | 0.002278 | 100 -       | 437597 | 48121 | 6671421 | 0.8239 | 0.002462 | 100 -       | 232810 | 22484 | 3242509 |
| Etal | Ldor | Hnum | Hmel | 0.0081 | 0.003469 | 2.327 best  | 47369  | 48139 | 6671421 | 0.0103 | 0.005248 | 1.968 best  | 22085  | 22546 | 3242509 |
| Etal | Hnum | Ldor | Hmel | 0.8041 | 0.00259  | 100 -       | 443307 | 48139 | 6671421 | 0.8254 | 0.002588 | 100 -       | 235700 | 22546 | 3242509 |
| Etal | Hmel | Ldor | Hnum | 0.8069 | 0.002211 | 100 -       | 443307 | 47369 | 6671421 | 0.8287 | 0.002459 | 100 -       | 235700 | 22085 | 3242509 |
| Etal | Ldor | Htim | Hcyd | 0.0174 | 0.004179 | 4.152 best  | 29300  | 28302 | 6671421 | 0.0145 | 0.00703  | 2.056 best  | 13548  | 13162 | 3242509 |
| Etal | Htim | Ldor | Hcyd | 0.8982 | 0.003397 | 100 -       | 527649 | 28302 | 6671421 | 0.9095 | 0.002685 | 100 -       | 277476 | 13162 | 3242509 |
| Etal | Hcyd | Ldor | Htim | 0.8948 | 0.003677 | 100 -       | 527649 | 29300 | 6671421 | 0.9069 | 0.002846 | 100 -       | 277476 | 13548 | 3242509 |
| Etal | Ldor | Htim | Hmel | 0.0082 | 0.004338 | 1.897 best  | 31053  | 31570 | 6671421 | 0.0036 | 0.006023 | 0.592 best  | 14704  | 14810 | 3242509 |
| Etal | Htim | Ldor | Hmel | 0.8856 | 0.002781 | 100 -       | 519954 | 31570 | 6671421 | 0.8967 | 0.002086 | 100 -       | 271776 | 14810 | 3242509 |
| Etal | Hmel | Ldor | Htim | 0.8873 | 0.002977 | 100 -       | 519954 | 31053 | 6671421 | 0.8974 | 0.002337 | 100 -       | 271776 | 14704 | 3242509 |
| Etal | Ldor | Hcyd | Hmel | 0.0242 | 0.004706 | 5.146 best  | 30517  | 32032 | 6671421 | 0.0168 | 0.006435 | 2.607 best  | 14410  | 14902 | 3242509 |
| Etal | Hcyd | Ldor | Hmel | 0.8834 | 0.002628 | 100 -       | 517357 | 32032 | 6671421 | 0.8955 | 0.002206 | 100 -       | 270249 | 14902 | 3242509 |
| Etal | Hmel | Ldor | Hcyd | 0.8886 | 0.002675 | 100 -       | 517357 | 30517 | 6671421 | 0.8988 | 0.002263 | 100 -       | 270249 | 14410 | 3242509 |
| Etal | Hbes | Hpar | Hnum | 0.1197 | 0.024587 | 4.868 -     | 67839  | 53395 | 6671421 | 0.1163 | 0.01639  | 7.095 -     | 33684  | 26682 | 3242509 |
| Etal | Hpar | Hbes | Hnum | 0.2268 | 0.006471 | 35.05 -     | 84703  | 53395 | 6671421 | 0.2065 | 0.006302 | 32.766 -    | 40564  | 26682 | 3242509 |
| Etal | Hnum | Hbes | Hpar | 0.1103 | 0.029543 | 3.734 best  | 84703  | 67839 | 6671421 | 0.0925 | 0.019814 | 4.669 best  | 40564  | 33684 | 3242509 |
| Etal | Hbes | Hpar | Htim | 0.164  | 0.006418 | 25.556 -    | 54755  | 76241 | 6671421 | 0.1653 | 0.008619 | 19.182 -    | 26765  | 37366 | 3242509 |
| Etal | Hpar | Hbes | Htim | 0.0889 | 0.018414 | 4.825 best  | 91074  | 76241 | 6671421 | 0.0808 | 0.01485  | 5.442 best  | 43930  | 37366 | 3242509 |
| Etal | Htim | Hbes | Hpar | 0.2493 | 0.019098 | 13.054 -    | 91074  | 54755 | 6671421 | 0.2429 | 0.012237 | 19.851 -    | 43930  | 26765 | 3242509 |
| Etal | Hbes | Hpar | Hcyd | 0.1744 | 0.006798 | 25.65 -     | 55771  | 79328 | 6671421 | 0.1773 | 0.008656 | 20.485 -    | 27232  | 38968 | 3242509 |
| Etal | Hpar | Hbes | Hcyd | 0.0444 | 0.021191 | 2.093 best  | 86650  | 79328 | 6671421 | 0.0354 | 0.015961 | 2.219 best  | 41824  | 38968 | 3242509 |
| Etal | Hcyd | Hbes | Hpar | 0.2171 | 0.021438 | 10.128 -    | 86650  | 55771 | 6671421 | 0.2114 | 0.012908 | 16.38 -     | 41824  | 27232 | 3242509 |
| Etal | Hbes | Hpar | Hmel | 0.1678 | 0.006523 | 25.729 -    | 53839  | 75559 | 6671421 | 0.1672 | 0.008554 | 19.551 -    | 26014  | 36462 | 3242509 |
| Etal | Hpar | Hbes | Hmel | 0.1063 | 0.017004 | 6.25 best   | 93490  | 75559 | 6671421 | 0.1051 | 0.014234 | 7.381 best  | 45017  | 36462 | 3242509 |
| Etal | Hmel | Hbes | Hpar | 0.2694 | 0.018289 | 14.729 -    | 93490  | 53839 | 6671421 | 0.2676 | 0.012415 | 21.558 -    | 45017  | 26014 | 3242509 |
| Etal | Hbes | Hnum | Htim | 0.2503 | 0.02047  | 12.228 -    | 53914  | 89844 | 6671421 | 0.2496 | 0.014866 | 16.79 -     | 26486  | 44089 | 3242509 |
| Etal | Hnum | Hbes | Htim | 0.1121 | 0.024404 | 4.592 best  | 71777  | 89844 | 6671421 | 0.1125 | 0.016906 | 6.654 best  | 35181  | 44089 | 3242509 |
| Etal | Htim | Hbes | Hnum | 0.1422 | 0.004851 | 29.312 -    | 71777  | 53914 | 6671421 | 0.141  | 0.005797 | 24.328 -    | 35181  | 26486 | 3242509 |
| Etal | Hbes | Hnum | Hcyd | 0.26   | 0.01963  | 13.245 -    | 54172  | 92173 | 6671421 | 0.2616 | 0.014109 | 18.542 -    | 26465  | 45203 | 3242509 |
| Etal | Hnum | Hbes | Hcyd | 0.138  | 0.02242  | 6.154 best  | 69857  | 92173 | 6671421 | 0.1383 | 0.015605 | 8.86 best   | 34229  | 45203 | 3242509 |
| Etal | Hcyd | Hbes | Hnum | 0.1265 | 0.003912 | 32.333 -    | 69857  | 54172 | 6671421 | 0.1279 | 0.00535  | 23.913 -    | 34229  | 26465 | 3242509 |
| Etal | Hbes | Hnum | Hmel | 0.2525 | 0.020693 | 12.2 -      | 53663  | 89827 | 6671421 | 0.2513 | 0.015119 | 16.624 -    | 26022  | 43472 | 3242509 |
| Etal | Hnum | Hbes | Hmel | 0.1073 | 0.025249 | 4.251 best  | 72458  | 89827 | 6671421 | 0.104  | 0.017825 | 5.833 best  | 35295  | 43472 | 3242509 |
| Etal | Hmel | Hbes | Hnum | 0.1491 | 0.004743 | 31.432 -    | 72458  | 53663 | 6671421 | 0.1513 | 0.005374 | 28.146 -    | 35295  | 26022 | 3242509 |
| Etal | Hbes | Htim | Hcyd | 0.0271 | 0.004699 | 5.774 best  | 37145  | 39216 | 6671421 | 0.0314 | 0.006406 | 4.899 best  | 17540  | 18675 | 3242509 |
| Etal | Htim | Hbes | Hcyd | 0.6099 | 0.01764  | 34.572 -    | 161703 | 39216 | 6671421 | 0.6173 | 0.012293 | 50.218 -    | 78906  | 18675 | 3242509 |
| Etal | Hcyd | Hbes | Htim | 0.6266 | 0.016893 | 37.092 -    | 161703 | 37145 | 6671421 | 0.6364 | 0.011473 | 55.466 -    | 78906  | 17540 | 3242509 |
| Etal | Hbes | Htim | Hmel | 0.0028 | 0.004998 | 0.56 best   | 41097  | 41331 | 6671421 | 0.0038 | 0.006002 | 0.636 best  | 20234  | 20081 | 3242509 |
| Etal | Htim | Hbes | Hmel | 0.5745 | 0.012515 | 45.9 -      | 152855 | 41331 | 6671421 | 0.5684 | 0.008905 | 63.833 -    | 72964  | 20081 | 3242509 |
| Etal | Hmel | Hbes | Htim | 0.5764 | 0.013231 | 43.562 -    | 152855 | 41097 | 6671421 | 0.5659 | 0.009549 | 59.26 -     | 72964  | 20234 | 3242509 |
| Etal | Hbes | Hcyd | Hmel | 0.0222 | 0.006025 | 3.69 best   | 42353  | 40516 | 6671421 | 0.0319 | 0.006972 | 4.581 best  | 20838  | 19550 | 3242509 |
| Etal | Hcyd | Hbes | Hmel | 0.5793 | 0.011021 | 52.565 -    | 152050 | 40516 | 6671421 | 0.5745 | 0.008332 | 68.954 -    | 72335  | 19550 | 3242509 |
| Etal | Hmel | Hbes | Hcyd | 0.5644 | 0.013018 | 43.354 -    | 152050 | 42353 | 6671421 | 0.5528 | 0.009769 | 56.586 -    | 72335  | 20838 | 3242509 |
| Etal | Hpar | Hnum | Htim | 0.103  | 0.02748  | 3.747 best  | 71480  | 87955 | 6671421 | 0.0957 | 0.019936 | 4.798 best  | 34539  | 41857 | 3242509 |
| Etal | Hnum | Hpar | Htim | 0.2478 | 0.005544 | 44.697 -    | 53024  | 87955 | 6671421 | 0.2325 | 0.008481 | 27.409 -    | 26069  | 41857 | 3242509 |
| Etal | Htim | Hpar | Hnum | 0.1488 | 0.02756  | 5.401 -     | 53024  | 71480 | 6671421 | 0.14   | 0.017324 | 8.082 -     | 26069  | 34539 | 3242509 |
| Etal | Hpar | Hnum | Hcyd | 0.1486 | 0.030243 | 4.915 -     | 68488  | 92474 | 6671421 | 0.1432 | 0.021035 | 6.807 -     | 32959  | 43985 | 3242509 |
| Etal | Hnum | Hpar | Hcyd | 0.2688 | 0.006037 | 44.529 -    | 53294  | 92474 | 6671421 | 0.2547 | 0.008446 | 30.155 -    | 26131  | 43985 | 3242509 |
| Etal | Hcyd | Hpar | Hnum | 0.1255 | 0.029823 | 4.208 best  | 53294  | 68488 | 6671421 | 0.1159 | 0.01806  | 6.415 best  | 26131  | 32959 | 3242509 |
| Etal | Hpar | Hnum | Hmel | 0.0831 | 0.026515 | 3.134 best  | 73431  | 86808 | 6671421 | 0.07   | 0.019526 | 3.583 best  | 35329  | 40656 | 3242509 |
| Etal | Hnum | Hpar | Hmel | 0.2456 | 0.006466 | 37.985 -    | 52575  | 86808 | 6671421 | 0.2273 | 0.008628 | 26.342 -    | 25599  | 40656 | 3242509 |
| Etal | Hmel | Hpar | Hnum | 0.1661 | 0.027363 | 6.071 -     | 52575  | 73431 | 6671421 | 0.16   | 0.017634 | 9.071 -     | 25599  | 35329 | 3242509 |
| Etal | Hpar | Htim | Hcyd | 0.0888 | 0.005828 | 15.2        |        |       |         |        |          |             |        |       |         |

| C  | Intro Rate |
|----|------------|
| 1  | 0.1        |
| 2  | 0.2        |
| 3  | 0.3        |
| 4  | 0.4        |
| 5  | 0.5        |
| 6  | 0.6        |
| 7  | 0.7        |
| 8  | 0.8        |
| 9  | 0.9        |
| 10 | -          |

**Table S12 Branch length test tree simulation parameters**

*650 coalescent trees for a population of size 1E6 were generated for 10 replicates of every combination of the values of C and introgression probabilities listed above.*

Table S13: QuBL results

| triplet           | outgroup | C1 | C2        | topology ILS proportion | topology non-ILS proportion | numTrees | BIC ILS+Introgression | BIC ILS only | dBIC         | total non-ILS |
|-------------------|----------|----|-----------|-------------------------|-----------------------------|----------|-----------------------|--------------|--------------|---------------|
| Hdem_HeraRef_Hhim | HeraRef  | 0  | 2.057531  | 0.793465                | 0.206535                    | 71       | -361.505298           | -370.068824  | 8.563526     | 0.002618569   |
| Hdem_HeraRef_Hhim | Hhim     | 0  | 15.227301 | 0.983312                | 0.016688                    | 61       | -294.136955           | -284.724582  | -9.412373    | 0.00018178    |
| Hdem_HeraRef_Hhim | Hdem     | 0  | 1.125482  | 0.010098                | 0.989902                    | 5469     | -29597.94544          | -25645.6843  | -3952.261131 | 0.966745364   |
| HeraRef_Hhim_Hsar | HeraRef  | 0  | 1.87269   | 0.643545                | 0.356455                    | 78       | -413.101013           | -420.635075  | 7.534062     | 0.004964909   |
| HeraRef_Hhim_Hsar | Hhim     | 0  | 14.418657 | 0.982132                | 0.017868                    | 57       | -257.665278           | -251.163442  | -6.501836    | 0.000181871   |
| HeraRef_Hhim_Hsar | Hsar     | 0  | 1.125737  | 0.010423                | 0.989577                    | 5466     | -29590.5868           | -25647.1986  | -3943.388221 | 0.965897836   |
| HeraRef_Hhim_Hhsa | HeraRef  | 0  | 0.925975  | 0.613002                | 0.386998                    | 99       | -524.283413           | -532.33038   | 8.046967     | 0.006841572   |
| HeraRef_Hhim_Hhsa | Hhim     | 0  | 10.600214 | 0.975165                | 0.024835                    | 91       | -458.014902           | -446.75402   | -11.260882   | 0.000403569   |
| HeraRef_Hhim_Hhsa | Hhsa     | 0  | 1.059925  | 0.009218                | 0.990782                    | 5411     | -32520.3515           | -28848.8324  | -3671.51913  | 0.957343108   |
| HeraRef_Hhim_Htel | HeraRef  | 0  | 2.477635  | 0.762397                | 0.237603                    | 80       | -423.580761           | -431.460546  | 7.879785     | 0.003394329   |
| HeraRef_Hhim_Htel | Hhim     | 0  | 8.40641   | 0.957962                | 0.042038                    | 68       | -323.848983           | -317.012627  | -6.836356    | 0.000510461   |
| HeraRef_Hhim_Htel | Htel     | 0  | 1.10061   | 0.007925                | 0.992075                    | 5453     | -30696.52225          | -26824.997   | -3871.525274 | 0.966033031   |
| Hdem_HeraRef_Hsar | HeraRef  | 0  | 0.789898  | 0.031609                | 0.968391                    | 5181     | -32382.32376          | -30086.4459  | -2295.877874 | 0.895934602   |
| Hdem_HeraRef_Hsar | Hdem     | 0  | 4.94368   | 0.050132                | 0.949868                    | 220      | -1257.595307          | -1257.73713  | -0.141827    | 0.001969471   |
| Hdem_HeraRef_Hsar | Hsar     | 0  | 3.909883  | 0.951471                | 0.048529                    | 199      | -1134.873815          | -1144.51409  | 9.640273     | 0.001724513   |
| Hdem_HeraRef_Hhsa | HeraRef  | 0  | 0.459958  | 0.189623                | 0.810377                    | 1308     | -8823.137161          | -8629.84017  | -202.296992  | 0.189280914   |
| Hdem_HeraRef_Hhsa | Hdem     | 0  | 0.504114  | 0.09214                 | 0.90786                     | 3884     | -25362.25088          | -24456.4777  | -905.773168  | 0.629665757   |
| Hdem_HeraRef_Hhsa | Hhsa     | 0  | 0.254643  | 0.77184                 | 0.22816                     | 409      | -2597.708981          | -2611.22678  | 13.517799    | 0.016663829   |
| HeraRef_Hsar_Htel | HeraRef  | 0  | 0.359318  | 0.197908                | 0.802092                    | 1746     | -12345.2966           | -12113.8402  | -231.456445  | 0.250080827   |
| Hdem_HeraRef_Htel | Hdem     | 0  | 0.443302  | 0.136761                | 0.863239                    | 2816     | -19898.97183          | -19384.3412  | -514.630632  | 0.434085897   |
| Hdem_HeraRef_Htel | Htel     | 0  | 0.487047  | 0.278998                | 0.721002                    | 1039     | -7396.028943          | -7289.86701  | -106.161934  | 0.133771621   |
| HeraRef_Hhsa_Hsar | HeraRef  | 0  | 0.468472  | 0.195945                | 0.804055                    | 1304     | -8840.500303          | -8639.38476  | -201.115544  | 0.18722995    |
| HeraRef_Hhsa_Hsar | Hsar     | 0  | 0.515912  | 0.093607                | 0.906393                    | 3879     | -25401.63856          | -24494.598   | -907.040515  | 0.627839008   |
| HeraRef_Hhsa_Hsar | Hhsa     | 0  | 0.261912  | 0.702549                | 0.297451                    | 418      | -2690.742075          | -2702.51712  | 11.775048    | 0.022202593   |
| HeraRef_Hsar_Htel | HeraRef  | 0  | 0.350743  | 0.207251                | 0.792749                    | 1741     | -12244.25297          | -12025.0904  | -219.162545  | 0.246460002   |
| HeraRef_Hsar_Htel | Hsar     | 0  | 0.450188  | 0.139836                | 0.860164                    | 2823     | -20045.16677          | -19522.3369  | -522.829914  | 0.433614816   |
| HeraRef_Hsar_Htel | Htel     | 0  | 0.466968  | 0.23126                 | 0.76874                     | 1037     | -7385.346024          | -7258.93623  | -126.40979   | 0.142354175   |
| HeraRef_Hhsa_Htel | HeraRef  | 0  | 0.643171  | 0.059855                | 0.940145                    | 2252     | -15606.37346          | -14906.64    | -699.733488  | 0.378072596   |
| HeraRef_Hhsa_Htel | Hhsa     | 0  | 0.319433  | 0.49473                 | 0.50527                     | 546      | -3516.346509          | -3508.04387  | -8.30264     | 0.049263825   |
| HeraRef_Hhsa_Htel | Htel     | 0  | 0.563221  | 0.073115                | 0.926885                    | 2803     | -18771.0552           | -18007.0465  | -764.008072  | 0.463939046   |
| Hdem_Hhim_Hsar    | Hhim     | 0  | 0.779486  | 0.03104                 | 0.968996                    | 5186     | -32380.66889          | -30094.3696  | -2286.299341 | 0.897326171   |
| Hdem_Hhim_Hsar    | Hdem     | 0  | 5.222097  | 0.951884                | 0.048116                    | 211      | -1196.043605          | -1192.12261  | -3.920993    | 0.001812942   |
| Hdem_Hhim_Hsar    | Hsar     | 0  | 3.895007  | 0.953575                | 0.046425                    | 203      | -1157.629236          | -1167.60083  | 9.971596     | 0.001682906   |
| Hdem_Hhim_Hhsa    | Hhim     | 0  | 0.456133  | 0.180636                | 0.819364                    | 1312     | -8846.481866          | -8637.2574   | -209.224464  | 0.19196528    |
| Hdem_Hhim_Hhsa    | Hdem     | 0  | 0.50376   | 0.080657                | 0.919343                    | 3874     | -25345.41414          | -24406.934   | -938.480151  | 0.635988354   |
| Hdem_Hhim_Hhsa    | Hhsa     | 0  | 0.257622  | 0.738655                | 0.261345                    | 415      | -2663.923935          | -2676.66086  | 12.736922    | 0.019367531   |
| Hdem_Hhim_Htel    | Hhim     | 0  | 0.36801   | 0.235066                | 0.764934                    | 1758     | -12379.498            | -12176.2094  | -203.288565  | 0.240134638   |
| Hdem_Hhim_Htel    | Hdem     | 0  | 0.443385  | 0.116065                | 0.883935                    | 2804     | -19853.56392          | -19306.4731  | -547.090809  | 0.442598882   |
| Hdem_Hhim_Htel    | Htel     | 0  | 0.484657  | 0.271341                | 0.728659                    | 1039     | -7394.195951          | -7285.25548  | -108.940473  | 0.135192268   |
| Hhim_Hhsa_Hsar    | Hhim     | 0  | 0.456081  | 0.172768                | 0.827232                    | 1301     | -8795.495182          | -8583.19927  | -212.295914  | 0.19218372    |
| Hhim_Hhsa_Hsar    | Hsar     | 0  | 0.514892  | 0.082006                | 0.917994                    | 3872     | -25400.03989          | -24459.6468  | -940.393073  | 0.63472728    |
| Hhim_Hhsa_Hsar    | Hhsa     | 0  | 0.289956  | 0.712546                | 0.287454                    | 428      | -2795.830827          | -2808.99046  | 13.159631    | 0.021969699   |
| Hhim_Hsar_Htel    | Hhim     | 0  | 0.342549  | 0.211073                | 0.788927                    | 1744     | -12205.23495          | -11991.7364  | -213.498556  | 0.245694409   |
| Hhim_Hsar_Htel    | Hsar     | 0  | 0.449463  | 0.124215                | 0.875785                    | 2816     | -20020.48942          | -19472.8728  | -547.616667  | 0.440394743   |
| Hhim_Hsar_Htel    | Htel     | 0  | 0.481915  | 0.261653                | 0.738347                    | 1041     | -7409.311041          | -7295.31707  | -113.993968  | 0.137253433   |
| Hhim_Hhsa_Htel    | Hhim     | 0  | 0.636701  | 0.065522                | 0.934478                    | 2257     | -15592.59829          | -14912.6958  | -679.902535  | 0.376628008   |
| Hhim_Hhsa_Htel    | Hhsa     | 0  | 0.308069  | 0.456403                | 0.543597                    | 546      | -3546.425361          | -3532.38628  | -14.039083   | 0.053000708   |
| Hhim_Hhsa_Htel    | Htel     | 0  | 0.555889  | 0.059001                | 0.940999                    | 2798     | -18781.74554          | -17983.4117  | -798.33379   | 0.470163429   |
| Hdem_Hhsa_Hsar    | Hdem     | 0  | 0.395254  | 0.865194                | 0.134806                    | 249      | -1448.460406          | -1462.508    | 14.047589    | 0.005994053   |
| Hdem_Hhsa_Hsar    | Hsar     | 0  | 0.523523  | 0.817126                | 0.182874                    | 259      | -1557.644272          | -1571.58832  | 13.944047    | 0.008457923   |
| Hdem_Hhsa_Hsar    | Hhsa     | 0  | 0.798602  | 0.037758                | 0.962242                    | 5092     | -32711.07474          | -30546.4139  | -2164.660869 | 0.874952904   |
| Hdem_Hsar_Htel    | Hdem     | 0  | 5.167494  | 0.953091                | 0.046909                    | 220      | -1226.673099          | -1222.77547  | -3.897628    | 0.001842854   |
| Hdem_Hsar_Htel    | Hsar     | 0  | 0.406189  | 0.857314                | 0.142686                    | 213      | -1218.517329          | -1234.26056  | 15.74323     | 0.005427164   |
| Hdem_Hsar_Htel    | Htel     | 0  | 0.82382   | 0.030906                | 0.969094                    | 5167     | -33218.78113          | -30839.2075  | -2379.573656 | 0.894162268   |
| Hdem_Hhsa_Htel    | Hdem     | 0  | 0.670144  | 0.295311                | 0.704689                    | 3259     | -21402.17834          | -20939.4945  | -462.683837  | 0.410103831   |
| Hdem_Hhsa_Htel    | Hhsa     | 0  | 0.308819  | 0.360583                | 0.639417                    | 1066     | -7338.899598          | -7275.55391  | -63.345685   | 0.121717593   |
| Hdem_Hhsa_Htel    | Htel     | 0  | 0.498155  | 0.158744                | 0.841256                    | 1276     | -8843.001179          | -8620.02517  | -222.976008  | 0.191686189   |
| Hhsa_Hsar_Htel    | Hsar     | 0  | 0.991904  | 0.544019                | 0.455981                    | 3255     | -21207.36039          | -20978.52145 | -228.942978  | 0.265038956   |
| Hhsa_Hsar_Htel    | Hhsa     | 0  | 0.298721  | 0.365553                | 0.634447                    | 1069     | -7337.194619          | -7275.52445  | -61.670169   | 0.121111401   |
| Hhsa_Hsar_Htel    | Htel     | 0  | 0.525667  | 0.180016                | 0.819984                    | 1277     | -8888.16268           | -8671.74486  | -216.4178162 | 0.186985637   |

**triplet:** The three-taxon subset considered. Species abbreviations separated by underscores. **Outgroup:** Species inferred to be the outgroup in the triplet gene tree topology tested.

**Cx:** Inferred species tree branch length for (1) the ILS case and (2) the non-ILS case. The ILS case is forced to be 0, as all lineages must be in the same population.

**Topology proportions:** Inferred mixture proportion for the ILS and non-ILS distributions. These values sum to 1.

**numTrees:** Frequency of the topology in the sample. **BICx:** Raw BIC values for each model **dBIC:** difference in BIC value between the models. **dBIC < -10** implies that the ILS+introgression model is a better fit for the data.

**total non-ILS:** topology non-ILS proportion \* (numTrees/total trees in sample). This value represents the genome-wide introgression fraction

**Table S14: Topology to chromosome size correlation.** This table shows correlations for the relationship of percent of windows within a chromosome showing a particular topology to chromosome total size. Formula for each linear model is  $\text{lm}(\text{percent topology} \sim \text{Chromosome Length})$

| Topology | r <sup>2</sup> | p        | slope      | intercept  |
|----------|----------------|----------|------------|------------|
| Tree 1   | 0.883          | 0        | -0.0328905 | 0.89383691 |
| Tree 2   | 0.726          | 0        | 0.01694918 | -0.0731941 |
| Tree 3   | 0.584          | 1.00E-04 | 0.01592566 | -0.1597327 |
| Tree 4   | 0.197          | 0.0286   | -0.0035893 | 0.14176093 |
| Tree 5   | 0.854          | 0        | 0.0056696  | -0.0523581 |
| Tree 6   | 0.712          | 0        | -0.0029986 | 0.08772379 |
| Tree 7   | 0.195          | 0.0294   | 0.00129813 | 0.01784327 |
| Tree 8   | 0.248          | 0.0148   | 0.00187587 | -7.13E-05  |
